# Supplementary material for: Remodeling of whole-body lipid metabolism and a diabetic-like phenotype caused by loss of CDK1 and hepatocyte division
Source: eLife. 2020 Dec 21;9:e63835. doi: 10.7554/eLife.63835 (PMC7771968; doi:10.7554/eLife.63835)
Supplement: Supplementary file 1. [file elife-63835-supp1.xlsx]

## Sheet: TG
TG - Intensity normalised to IS	Control_8wo							Cdk1 cKO_8wo
	Control 1	Control 2	Control 3	Control 4	Control 5	Average	Std. Dev.	KO 1	KO 2	KO 3	KO 4	KO 5	Average	Std. Dev.
TG 48:0 - d5	1	1	1	1	1	1	0	1	1	1	1	1	1	0
TG 48:0	5.07626	2.22606e-05	0.633029	18.0595	4.41112e-05	4.75377	7.73504	0.491656	1.6292e-05	1.49888	8.4246e-06	2.84511	0.967136	1.21514
TG 48:1	9.2799	4.49999	5.11428	16.4507	7.26952	8.52288	4.81656	2.25007	2.14784	1.71608	0.865543	3.32143	2.06019	0.891635
TG 48:2	7.53538	2.22785	6.51672	23.4371	5.33083	9.00957	8.30761	1.52648	3.94898	1.76216	1.61836	2.25169	2.22153	1.00535
TG 48:3	4.48873	0.90445	3.2398	8.64976	4.0865	4.27385	2.813	0.602535	1.60818	1.45405	1.28986	2.11259	1.41344	0.548002
TG 50:1	14.5776	8.29565	5.55351	22.8039	14.7777	13.2017	6.69222	3.10414	1.94461	1.3838	1.94389	3.92312	2.45991	1.03027
TG 50:2	6.22314	3.61914	8.001	9.7561e-05	11.6687	5.90242	4.41044	4.14024	1.6292e-05	2.4493	1.81697	6.64868	3.01104	2.51571
TG 50:3	5.00217	2.23719	3.11639	11.1366	1.72695	4.64386	3.83788	3.09676	1.68149	0.246806	0.256445	1.93703	1.44371	1.21188
TG 50:4	1.49653	2.79594	2.75585	13.3054	3.21216	4.71317	4.84594	0.486521	1.09035	0.918042	0.816291	1.51129	0.9645	0.376631
TG 52:0	5.0247	2.39614	4.03445	17.9941	5.75915	7.04172	6.25088	0.738286	2.01206	1.26252	0.965122	1.79135	1.35387	0.539215
TG 52:1	5.95797	2.80217	2.8602	21.5054	6.53286	7.93171	7.78025	2.17266	0.616325	1.39911	0.707329	0.0421053	0.987505	0.819155
TG 52:2	0.883882	1.34788	6.42843	25.2361	15.6714	9.91353	10.4281	3.71791	2.66862	1.57341	1.56091	5.6235	3.02887	1.70367
TG 52:3	10.3847	1.31627	6.8107	29.0566	12.9771	12.1091	10.4343	4.07285	3.58667	2.01095	2.05512	6.04023	3.55316	1.66427
TG 52:4	1.30329	1.10524	2.32207	11.7922	5.20379	4.34532	4.47321	1.75899	1.57299	0.861387	1.07035	2.41222	1.53518	0.610488
TG 52:5	2.9753	4.0619	2.80368	22.4176	3.31187	7.11406	8.56852	3.15449	2.22564	1.87214	1.51457	3.6547	2.48431	0.894566
TG 52:6	4.60615	1.40509	0.777592	1.80195	2.77195	2.27255	1.49197	0.725931	1.01059	0.606266	0.278602	1.8797e-05	0.524281	0.393411
TG 53:2	44.2197	23.1072	32.0097	128.518	45.5421	54.6794	42.2959	12.695	15.4356	9.06855	6.4321	25.1521	13.7567	7.23583
TG 53:3	6.7279	0.562749	3.34448e-05	2.50439	5.57449	3.07391	2.98679	1.05103	2.16833	1.04948	1.13218	2.65545	1.61129	0.751604
TG 53:4	4.36525	1.92666	2.39799	9.52878	2.13013	4.06976	3.20305	1.19833	0.849625	0.351754	0.20893	0.647556	0.651239	0.394971
TG 54:1	7.10355	5.48168	0.295987	11.6341	7.00397	6.30387	4.07161	2.1347	3.33034	1.66761	0.930413	1.54436	1.92148	0.89711
TG 54:2	10.3579	1.79888	6.61137	20.5512	7.5386	9.37159	6.96924	2.59419	3.34115	0.972217	1.25864	2.86823	2.20689	1.03652
TG 54:3	1.17418	2.10051	1.36254	11.8702	7.73274	4.84804	4.76518	1.1051	1.37357	1.47469	1.38916	2.99361	1.66723	0.754304
TG 54:4	5.86872	2.53237	2.45418	7.04488	6.66696	4.91342	2.24988	0.324615	0.650863	0.890996	0.627043	1.87237	0.873177	0.593638
TG 54:5	2.32236	2.17108	2.89365	13.1024	5.4367	5.18524	4.6173	1.65404	1.33301	1.41158	1.0353	1.90564	1.46791	0.329688
TG 54:6	5.34445	2.07625	2.38294	9.49561	7.24452	5.30875	3.17363	1.48344	1.0202	1.8981	0.612721	3.44436	1.69177	1.09235
TG 54:7	0.889948	3.51117	3.8612	14.5854	6.50563	5.87066	5.26217	1.89561	3.15543	1.27661	1.16411	3.78383	2.25512	1.16453
TG 54:8	2.66551	2.23653	2.87425	9.37268	7.38994	4.90778	3.25558	2.98981	0.125611	1.41604	1.27091	2.73722	1.70792	1.17074
TG 56:2	7.29983	2.47494	3.66856	10.7366	8.26687	6.48936	3.3885	2.80777	2.41561	2.24701	0.846757	3.25094	2.31362	0.906818
TG 56:3	0.761265	3.03902	3.90903	13.2927	4.43891	5.08818	4.79706	2.75321	1.47344	1.81931	1.26116	3.49211	2.15985	0.938315
TG 56:4	4.89428	0.900888	2.57659	6.65561	3.36259	3.67799	2.20059	1.03179	0.843687	1.05462	0.918264	1.56165	1.082	0.281488
TG 56:5	4.79939	0.291169	0.803679	11.3737	8.3101	5.1156	4.77849	2.37417	0.91854	0.939972	1.58239	2.90714	1.74444	0.880905
TG 56:6	2.13908	1.11192	1.42308	8.14927	2.69042	3.10275	2.8875	1.62323	0.834752	0.705029	0.69663	1.96898	1.16573	0.590842
TG 56:7	6.75217	3.74669	3.20067	10.6322	5.82893	6.03213	2.95638	1.39249	2.53943	1.46867	0.79385	1.6985	1.57859	0.632479
TG 56:8	10.8605	5.13442	0.517057	9.34146	6.85223	6.54113	4.0269	2.15982	2.02885	1.7901	0.552734	2.24737	1.75578	0.694257
TG 56:9	0.238735	1.29312	2.33378	4.01268	3.60954	2.29757	1.57416	1.77487	1.71408	0.553843	0.767056	1.53665	1.2693	0.567678
TG 58:10	5.9792	2.22606e-05	1.80769	7.05854	6.30569	4.23023	3.12766	1.37115	1.99644	0.987122	0.861247	2.31823	1.50684	0.633122
TG 58:8	2.20537	2.16281	3.19025	10.1395	4.41112e-05	3.5396	3.86927	0.962933	2.18361	0.507402	0.756024	2.66974	1.41594	0.952296

## Sheet: AcylCarnitine
Acylcarnitine - Intensity normalised to IS	Control_8wo							Cdk1 cKO_8wo
	Control 1	Control 2	Control 3	Control 4	Control 5	Average	Std. Dev.	KO 1	KO 2	KO 3	KO 4	KO 5	Average	Std. Dev.
AcylCarnitine 16:0-d3 (IS)	1	1	1	1	1	1	0	1	1	1	1	1	1	0
AcylCarnitine 16:0	5.88312	12.7108	1.50834	3.55249	4.7116	5.67327	4.25265	7.70368	13.3108	1.52022	10.7422	10.8954	8.83447	4.54701
AcylCarnitine 16:1	2.34946	5.35996	0.425097	1.9537	3.60128	2.7379	1.85308	4.99774	5.82738	0.290545	5.38713	7.53051	4.80666	2.70324
AcylCarnitine 18:0	1.58954	2.21557	0.912133	1.16279	1.40162	1.45633	0.494848	2.17006	2.72628	1.1073	2.92288	3.18691	2.42269	0.82469
AcylCarnitine 18:1	16.6702	31.0745	2.66975	14.1032	35.2074	19.945	13.2296	43.6119	40.8252	1.74953	60.5306	56.5581	40.6551	23.2935
AcylCarnitine 18:2	5.33428	8.62851	1.39713	2.56571	5.79694	4.74451	2.85013	7.68364	9.80349	1.79042	7.4377	15.5832	8.4597	4.9668
AcylCarnitine 20:4	1.5839	1.65945	1.33019	1.43713	2.05591	1.61332	0.278426	3.12102	2.8336	1.58255	2.66719	2.26861	2.49459	0.595819

## Sheet: LPC
LPC - Intensity normalised to IS	Control_8wo							Cdk1 cKO_8wo
	Control 1	Control 2	Control 3	Control 4	Control 5	Average	Std. Dev.	KO 1	KO 2	KO 3	KO 4	KO 5	Average	Std. Dev.
LPC 20:0 (IS)	1	1	1	1	1	1	0	1	1	1	1	1	1	0
LPC 15:0/LPC O-16:0	0.00179473	0.00248403	0.00699385	0.00407471	0.00254293	0.00357805	0.00208344	0.00183371	0.00257851	0.00308194	0.00195089	0.00521557	0.00293212	0.00137213
LPC 16:0	0.412186	0.504751	1.15802	0.742984	0.646267	0.692841	0.289489	0.602035	0.572542	1.0104	0.595556	0.719074	0.699921	0.182661
LPC 16:1	0.0135707	0.0207757	0.0278302	0.0357663	0.0270621	0.025001	0.0083164	0.0233357	0.0285947	0.0376581	0.0302936	0.0223017	0.0284368	0.00616778
LPC 17:0/LPC O-18:0	0.00721954	0.00806085	0.0215972	0.0118515	0.00684074	0.011114	0.00618853	0.00535403	0.007417	0.00802114	0.00463622	0.0100803	0.00710174	0.00217658
LPC 17:1/LPC O-18:1/LPC P-18:0	0.0020032	0.00246264	0.00516696	0.00483201	0.00306323	0.00350561	0.00141952	0.00208523	0.00322492	0.00377786	0.00233748	0.00310673	0.00290644	0.000689022
LPC 18:0	0.193356	0.2632	0.414141	0.273918	0.256557	0.280235	0.0811934	0.223148	0.280913	0.377525	0.19393	0.29631	0.274365	0.0711679
LPC 18:1	0.121537	0.157229	0.369328	0.41592	0.295639	0.271931	0.128992	0.23958	0.224638	0.513378	0.301712	0.229486	0.301759	0.12229
LPC 18:2	0.350948	0.501626	0.693892	0.717161	0.622387	0.577203	0.151781	0.474955	0.572594	0.757641	0.470027	0.469257	0.548895	0.124666
LPC 18:3	0.0118544	0.0125346	0.0164373	0.0275637	0.019698	0.0176176	0.0063972	0.0149538	0.0190535	0.0280648	0.0217858	0.017737	0.020319	0.00498004
LPC 20:1	0.00586404	0.0065324	0.0128053	0.00758665	0.00658735	0.00787515	0.00282381	0.00664917	0.00904803	0.00697374	0.00481898	0.00357834	0.00621365	0.00210304
LPC 20:2	0.00619738	0.00738748	0.0183897	0.0134841	0.00839071	0.0107699	0.0050852	0.00723183	0.00959248	0.0131522	0.00748259	0.00624493	0.00874081	0.00275117
LPC 20:3	0.0384395	0.0529762	0.129039	0.129377	0.135472	0.0970608	0.0472289	0.0768414	0.102365	0.0959108	0.0606608	0.0615762	0.0794709	0.0192053
LPC 20:4	0.266188	0.254548	0.553787	0.449021	0.38407	0.381523	0.126157	0.316227	0.423575	0.54912	0.302557	0.32448	0.383192	0.104399
LPC 20:5	0.00338142	0.00428435	0.00569833	0.0158181	0.0098921	0.00781485	0.00512264	0.00468754	0.00852235	0.0131237	0.0116978	0.00653533	0.00891333	0.00350518
LPC 22:0	0.00334026	0.00497589	0.00250147	0.00298976	0.00256467	0.00327441	0.00101015	0.00238245	0.00352924	0.00172091	0.00249496	0.00482565	0.00299064	0.00121297
LPC 22:1	0.00114948	0.00164157	0.00158351	0.00158392	0.00111553	0.0014148	0.000259058	0.00102783	0.00154791	0.00101281	0.000784656	0.00113037	0.00110071	0.000280086
LPC 22:2	0.000750816	0.000863092	0.00102984	0.00104864	0.000767565	0.000891992	0.000141236	0.000733078	0.000931872	0.000727501	0.000657535	0.000823755	0.000774748	0.000105827
LPC 22:4	0.00211926	0.00326217	0.00841323	0.0071203	0.00546525	0.00527604	0.00261247	0.00493205	0.00396914	0.0102939	0.00531189	0.00445627	0.00579265	0.00256632
LPC 22:5	0.0124408	0.00992783	0.0419235	0.0349718	0.0203775	0.0239283	0.0140211	0.0202057	0.0234163	0.0403356	0.026994	0.025996	0.0273895	0.0076989
LPC 22:6	0.221306	0.261624	0.613291	0.453889	0.385743	0.38717	0.157207	0.309853	0.405158	0.448203	0.286868	0.327332	0.355483	0.0682773

## Sheet: LPE
LPE - Intensity normalised to IS	Control_8wo							Cdk1 cKO_8wo
	Control 1	Control 2	Control 3	Control 4	Control 5	Average	Std. Dev.	KO 1	KO 2	KO 3	KO 4	KO 5	Average	Std. Dev.
LPE 14:0 (IS)	1	1	1	1	1	1	0	1	1	1	1	1	1	0
LPE 16:0	0.663931	0.692767	2.34185	1.10322	0.885838	1.13752	0.695884	0.802632	0.732244	2.36552	0.860858	1.02403	1.15706	0.684088
LPE 16:1	0.0364692	0.0352553	0.0548825	0.0521785	0.0410635	0.0439698	0.00904319	0.0396836	0.0416899	0.0575691	0.0384146	0.034428	0.042357	0.00890804
LPE 18:0	0.46956	0.604225	2.96931	0.945935	0.8535	1.16851	1.02452	0.721314	0.656649	2.85975	0.711709	0.937539	1.17739	0.946558
LPE 18:1	0.354968	0.40585	0.847788	0.482985	0.398524	0.498023	0.200887	0.415004	0.395045	0.629188	0.322857	0.390911	0.430601	0.116328
LPE 18:2	0.487171	0.478845	0.753105	0.596807	0.649599	0.593106	0.115198	0.571291	0.57321	0.749201	0.548147	0.501197	0.588609	0.0943464
LPE 20:0	0.00949082	0.00848819	0.0286862	0.011696	0.0120307	0.0140784	0.00829991	0.00759986	0.00935402	0.0257112	0.00941589	0.0061733	0.0116508	0.00797461
LPE 20:1	0.021136	0.0209262	0.0485215	0.0238037	0.0252968	0.0279368	0.0116531	0.0242887	0.0251769	0.0325494	0.0170899	0.0150724	0.0228355	0.00698625
LPE 20:2	0.0159405	0.0163919	0.0403735	0.0194326	0.016	0.0216277	0.0105789	0.0170576	0.0156762	0.0258552	0.0137006	0.0150654	0.017471	0.00483966
LPE 20:3	0.0649598	0.0675678	0.115638	0.0913814	0.10834	0.0895773	0.0230481	0.107227	0.102931	0.111189	0.0894933	0.0776479	0.0976976	0.01387
LPE 20:4	1.01519	0.937837	1.53708	1.37272	1.58646	1.28986	0.298042	1.34434	1.57309	1.68068	1.22743	1.16748	1.3986	0.221176
LPE 20:5	0.0187407	0.019472	0.0220804	0.0310701	0.0354113	0.0253549	0.00746448	0.0243318	0.0315229	0.026887	0.0258463	0.0241615	0.0265499	0.00299848
LPE 22:6	1.16962	1.12416	2.3466	1.31921	1.86716	1.56535	0.527559	2.08124	1.88059	2.49775	1.6499	1.85119	1.99213	0.321334

## Sheet: PG
PG - Intensity normalised to IS	Control_8wo							Cdk1 cKO_8wo
	Control 1	Control 2	Control 3	Control 4	Control 5	Average	Std. Dev.	KO 1	KO 2	KO 3	KO 4	KO 5	Average	Std. Dev.
PG 28:0 (IS)	1	1	1	1	1	1	0	1	1	1	1	1	1	0
PG 32:0	0.0997928	0.0696992	0.107827	0.117235	0.0856115	0.0960331	0.0187405	0.138392	0.112019	0.15272	0.158361	0.114274	0.135153	0.0213824
PG 32:1	0.0805882	0.10045	0.0820647	0.145359	0.113672	0.104427	0.0266696	0.222134	0.150833	0.199028	0.220815	0.122601	0.183082	0.0444439
PG 32:2	0.0330389	0.0367317	0.0278	0.0288194	0.0232687	0.0299317	0.00514956	0.0663187	0.0368694	0.037004	0.0481736	0.0259409	0.0428613	0.0152887
PG 34:0	0.0379119	0	0.0793808	0	0.0228108	0.0280207	0.0329134	0	0.0402885	0.0140241	0.0702054	0.0333535	0.0315743	0.0268161
PG 34:1	4.0543	5.26809	3.13173	4.08321	3.82495	4.07246	0.770746	7.06663	4.58253	4.9326	4.80993	5.1166	5.30166	1.00555
PG 34:2	3.78954	3.07696	2.62276	2.78523	1.87502	2.8299	0.696179	3.28311	3.25584	2.91024	2.93099	2.3796	2.95196	0.364618
PG 34:3	0.294214	0.33332	0.274044	0.302321	0.177893	0.276358	0.0590303	0.380432	0.487491	0.299562	0.325741	0.270241	0.352693	0.085568
PG 36:1	0.273091	0.258779	0.139591	0.225381	0.213455	0.222059	0.0520545	0.281578	0.255648	0.349548	0.313672	0.382786	0.316646	0.0510302
PG 36:2	1.82421	1.97022	1.49211	1.13194	0.972807	1.47826	0.429334	1.88886	1.3404	2.07616	1.61395	1.61153	1.70618	0.283511
PG 36:3	1.22097	1.08298	1.08829	0.961041	0.713883	1.01343	0.19104	1.45689	1.28547	1.5974	1.14796	0.979576	1.29346	0.244359
PG 36:4	3.7138	2.7202	3.83521	3.02812	2.21733	3.10293	0.679291	3.32765	3.33286	4.6241	3.16491	2.36828	3.36356	0.809513
PG 36:5	0.154284	0.127173	0.145427	0.134329	0.0793663	0.128116	0.0291568	0.150864	0.128755	0.179542	0.150494	0.0905657	0.140044	0.0330225
PG 38:4	0.962921	0.500323	0.945901	0.720401	0.33241	0.692391	0.276005	0.992594	0.83405	1.20057	0.749412	0.615544	0.878433	0.226125
PG 38:5	0.431223	0.224484	0.494894	0.365132	0.18387	0.339921	0.132915	0.660343	0.434666	0.44735	0.32514	0.241296	0.421759	0.157834
PG 38:6	1.09214	0.452616	1.16718	0.79669	0.387232	0.779171	0.356742	1.37608	0.984898	1.32756	0.770606	0.481227	0.988074	0.37749
PG 40:5	0.0274119	0.0139498	0.0526102	0.021426	0.0173879	0.0265572	0.0154016	0.0760984	0.0456208	0.0783971	0.0307264	0.0354103	0.0532506	0.0225732
PG 40:6	0.294704	0.119728	0.321162	0.16081	0.102053	0.199691	0.101515	0.378353	0.217341	0.471652	0.234508	0.171582	0.294687	0.125574
PG 40:7	0.17341	0.102604	0.222248	0.128355	0.0558606	0.136495	0.0640956	0.24564	0.159205	0.175728	0.125741	0.0821463	0.157692	0.0608081

## Sheet: PI
PI - Intensity normalised to IS	Control_8wo							Cdk1 cKO_8wo
	Control 1	Control 2	Control 3	Control 4	Control 5	Average	Std. Dev.	KO 1	KO 2	KO 3	KO 4	KO 5	Average	Std. Dev.
PI 12:0/13:0 (IS)	1	1	1	1	1	1	0	1	1	1	1	1	1	0
PI 32:1	0.0512489	0.0562302	0.0300452	0.142022	0.0857238	0.073054	0.0433744	0.0985515	0.104454	0.0948493	0.133466	0.0611871	0.0985016	0.0258052
PI 34:0	0.00949953	0.00872307	0.0165699	0.0265233	0.0122202	0.0147072	0.00728363	0.00818802	0.0166951	0.0125027	0.0143708	0.00116731	0.0105848	0.00611925
PI 34:1	0.257228	0.325926	0.197931	0.573439	0.409085	0.352722	0.146364	0.466682	0.3786	0.506645	0.551576	0.366987	0.454098	0.0801715
PI 34:2	3.17244	2.9079	2.28692	3.29314	2.73532	2.87915	0.396753	2.36775	3.09326	2.42514	2.85885	2.54647	2.65829	0.308503
PI 34:3	0.199882	0.173162	0.0911689	0.209153	0.16715	0.168103	0.0464768	0.173158	0.193911	0.144424	0.192747	0.144303	0.169709	0.0245619
PI 36:0	0.0117383	0.010456	0.00925301	0.00914631	0.00472644	0.009064	0.00264321	0.00752507	0.00769826	0.0141575	0.0139693	0.0147858	0.0116272	0.00367863
PI 36:1	0.0602897	0.043131	0.1466	0.124531	0.150775	0.105065	0.0500852	0.0974907	0.109144	0.181041	0.139597	0.117109	0.128876	0.0329736
PI 36:2	2.85607	3.50024	2.50769	3.05671	2.54809	2.89376	0.407529	1.56321	1.93585	1.58764	1.79639	1.93478	1.76358	0.181084
PI 36:3	1.80779	2.20261	1.8945	2.31844	2.10853	2.06637	0.212296	1.69988	2.12689	1.46557	1.93412	1.77971	1.80123	0.248553
PI 36:4	6.04933	5.65783	5.67915	8.05622	7.87374	6.66325	1.20019	7.16386	7.65366	7.60858	9.18089	7.04594	7.73059	0.853538
PI 36:5	0.22163	0.205121	0.11918	0.222629	0.179798	0.189671	0.0430487	0.206295	0.264905	0.202888	0.297205	0.154949	0.225249	0.056017
PI 38:2	0.281964	0.26558	0.193289	0.3021	0.272644	0.263115	0.0413751	0.280782	0.11924	0.304094	0.305006	0.208713	0.243567	0.0798363
PI 38:3	3.18666	3.26653	3.80327	3.31209	5.0422	3.72215	0.776467	3.88151	4.73917	2.52495	2.67298	3.11847	3.38742	0.921679
PI 38:4	52.4565	51.4843	38.4676	45.9234	45.5219	46.7708	5.60726	54.3017	52.2293	43.0841	49.6969	52.7805	50.4185	4.42299
PI 38:5	3.86514	3.62071	2.66826	2.73667	2.48212	3.07458	0.623205	3.77382	4.31203	2.36759	2.95206	2.47905	3.17691	0.842225
PI 38:6	0.560975	0.544615	0.644834	0.537037	0.483037	0.554099	0.0585469	0.628227	0.671302	0.434043	0.483637	0.582734	0.559989	0.099066
PI 40:4	0.710668	0.574968	0.455021	0.561347	0.614638	0.583328	0.0924819	0.556061	0.71896	0.527752	0.665502	0.402994	0.574254	0.123581
PI 40:5	0.397244	0.449065	0.513646	0.434848	0.442796	0.44752	0.0420882	0.416396	0.4655	0.359597	0.451674	0.365889	0.411811	0.04829
PI 40:6	0.691602	0.659266	0.761007	0.619825	0.646527	0.675645	0.0542525	0.589768	0.67298	0.526862	0.469929	0.513692	0.554646	0.0788395
PI 40:7	0.0773758	0.0785722	0.0788989	0.0547833	0.0400755	0.0659412	0.0176899	0.0579566	0.100043	0.0443536	0.0472131	0.061219	0.0621571	0.0223281

## Sheet: SM
SM - Intensity normalised to IS	Control_8wo							Cdk1 cKO_8wo
	Control 1	Control 2	Control 3	Control 4	Control 5	Average	Std. Dev.	KO 1	KO 2	KO 3	KO 4	KO 5	Average	Std. Dev.
SM 30:1 (IS)	1	1	1	1	1	1	0	1	1	1	1	1	1	0
SM 32:1	0.0102441	0.0111594	0.00752733	0.00762074	0.00754202	0.00881873	0.00174953	0.0102316	0.00997487	0.0064199	0.0064813	0.0136905	0.00935962	0.00303404
SM 33:1	0.0447619	0.0529514	0.0345349	0.0339604	0.0329457	0.0398309	0.00875185	0.0322634	0.0462853	0.0201053	0.0244905	0.0362615	0.0318812	0.0102482
SM 34:0	0.0923005	0.0887769	0.0689721	0.123761	0.111962	0.0971546	0.0213025	0.136008	0.113985	0.141074	0.13834	0.106188	0.127119	0.0158923
SM 34:1	1.26009	1.29237	1.33196	1.11685	1.03851	1.20796	0.12473	1.86878	1.37132	1.2404	1.2414	2.29346	1.60307	0.464566
SM 34:2	0.034488	0.0349044	0.026161	0.0320628	0.0344416	0.0324116	0.00366874	0.0469253	0.0317645	0.0259539	0.0284792	0.0488396	0.0363925	0.0107107
SM 35:1	0.0226671	0.0226513	0.0235485	0.0236777	0.0165004	0.021809	0.00300604	0.0273376	0.0239624	0.0172284	0.0199051	0.0311946	0.0239256	0.00560128
SM 36:1	0.153158	0.195184	0.151394	0.178916	0.18335	0.1724	0.0193196	0.323445	0.207479	0.25418	0.227701	0.418827	0.286326	0.0860544
SM 36:2	0.0120514	0.0145452	0.00806629	0.00978366	0.0104053	0.0109704	0.00245507	0.0214608	0.0147153	0.0132278	0.0151534	0.029437	0.0187989	0.00673157
SM 37:1	0.0256718	0.0275925	0.0199271	0.0209951	0.0187357	0.0225845	0.003841	0.0236474	0.0262986	0.0160352	0.0152946	0.0256288	0.0213809	0.00531472
SM 39:1	0.203412	0.195975	0.125208	0.12108	0.120899	0.153315	0.0424543	0.0764195	0.183835	0.0730496	0.0740863	0.108331	0.103144	0.0474398
SM 40:0	0.0707242	0.148606	0.0137326	0.0830972	0.0491018	0.0730523	0.0497671	0.0528446	0.074992	0.0461517	0.053338	0.0442931	0.0543239	0.0122243
SM 40:1	3.34929	3.34869	2.01304	2.09833	2.29475	2.62082	0.67253	2.66998	2.99694	2.07541	2.12305	3.33238	2.63955	0.546281
SM 40:2	0.536108	0.483362	0.284476	0.386094	0.384551	0.414918	0.0976467	0.595112	0.581401	0.248807	0.29962	0.468514	0.438691	0.158997
SM 41:0	0.0145493	0.0141586	0.0204408	0.0133848	0.00593353	0.0136934	0.00516689	0.010616	0	0.00487455	0.0144901	0.01429	0.00885414	0.00629781
SM 41:1	1.00612	0.900535	0.747794	0.787817	0.582023	0.804858	0.160362	0.401748	1.1104	0.580509	0.539988	0.589202	0.64437	0.271142
SM 41:2	0.220376	0.198651	0.138074	0.167012	0.13284	0.171391	0.0379408	0.178596	0.217965	0.080487	0.0948727	0.132342	0.140853	0.057449
SM 42:0	0.0454651	0.0244256	0.0344489	0.0295678	0.0267595	0.0321334	0.00833619	0.0287485	0.0257208	0	0.0297023	0.0153376	0.0199018	0.0125009
SM 42:1	2.33768	2.3621	1.81671	1.78256	1.95684	2.05118	0.28053	2.21703	2.14093	2.35558	1.90051	2.4863	2.22007	0.22228
SM 42:2	3.06539	3.04451	2.56172	2.64319	2.51705	2.76637	0.267387	5.47426	3.11772	1.92185	2.46547	3.61286	3.31843	1.36497
SM 42:3	0.540332	0.554996	0.444862	0.447065	0.386249	0.474701	0.0711205	0.878371	0.576323	0.364002	0.428042	0.84493	0.618334	0.235386
SM 43:0	0.0319072	0.0322411	0.0219474	0.0207418	0.0202032	0.0254081	0.00611902	0.0237621	0.031084	0.0199601	0.0185755	0.0290068	0.0244777	0.00547522
SM 43:1	0.0791797	0.081043	0.0732889	0.082586	0.0633048	0.0758805	0.0078639	0.0582297	0.082366	0.0449516	0.0505326	0.0694831	0.0611126	0.0150266
SM 43:2	0.0343482	0.0327514	0.0338457	0.0301056	0.0223139	0.030673	0.00495201	0.0290558	0.0339611	0.0190385	0.0233188	0.0301845	0.0271117	0.00590971
SM 44:1	0.0100028	0.0111252	0.00756624	0.00902988	0.00799647	0.00914412	0.00145618	0.00877738	0.0114608	0.00884171	0.00813231	0.00996563	0.00943556	0.00131024
SM 44:2	0.0100266	0.0102072	0.00931499	0.00964612	0.00915178	0.00966934	0.000450251	0.0162826	0.0112575	0.00847391	0.00925623	0.015951	0.0122443	0.00367987

## Sheet: PC
PC - Intensity normalised to IS	Control_8wo							Cdk1 cKO_8wo
	Control 1	Control 2	Control 3	Control 4	Control 5	Average	Std. Dev.	KO 1	KO 2	KO 3	KO 4	KO 5	Average	Std. Dev.
PC 28:0 (IS)	1	1	1	1	1	1	0	1	1	1	1	1	1	0
PC 31:0/PC O-32:0	0.0291503	0.0307653	0.0232025	0.0266744	0.0253581	0.0270301	0.00300082	0.0331627	0.0273366	0.0243087	0.0220845	0.0363795	0.0286544	0.00599555
PC 32:0	0.414249	0.506492	0.295801	0.462836	0.414735	0.418823	0.0787324	0.553666	0.458422	0.412738	0.476721	0.491338	0.478577	0.0513458
PC 32:1	0.159045	0.176995	0.0937688	0.267998	0.232135	0.185988	0.0673914	0.30197	0.313454	0.290483	0.423466	0.210436	0.307962	0.0761973
PC 32:2	0.0549177	0.0651152	0.0260732	0.0494014	0.0439387	0.0478892	0.0144911	0.0576532	0.0530497	0.0462549	0.053638	0.0440079	0.0509208	0.00563025
PC 33:0	0.0135348	0.0116055	0.0122682	0.0140269	0.0124325	0.0127736	0.000985704	0.0128947	0.01327	0.0111536	0.0143463	0.0165302	0.0136389	0.00198286
PC 33:1/PC O-34:1	0.0513747	0.0548205	0.0425163	0.0642962	0.0454821	0.051698	0.00853683	0.0508989	0.0504021	0.0585067	0.056405	0.0656567	0.0563739	0.00625218
PC 33:2/PC O-34:2/PC P-34:1	0.044674	0.0606566	0.0367629	0.0479806	0.0306847	0.0441518	0.0114379	0.0260821	0.0387296	0.025406	0.0229905	0.055753	0.0337922	0.0137214
PC 34:0	0.067724	0.0729663	0.0326391	0.0632732	0.0712235	0.0615652	0.0165894	0.0649141	0.0553955	0.0892858	0.103137	0.0562491	0.0737962	0.0213669
PC 34:1	1.52763	1.90423	1.30707	2.57529	2.30847	1.92454	0.526806	3.09087	2.47383	2.92219	3.50128	2.68023	2.93368	0.394559
PC 34:2	6.12181	7.48881	3.68099	5.3392	5.68759	5.66368	1.3764	5.58037	5.66983	4.60932	4.73795	4.91997	5.10349	0.489811
PC 34:3	0.442838	0.516864	0.232754	0.386156	0.355869	0.386896	0.105764	0.401301	0.4367	0.292604	0.413801	0.369825	0.382846	0.055929
PC 34:4	0.0313055	0.0387091	0.0160553	0.0302082	0.0257489	0.0284054	0.00832781	0.0299522	0.0366962	0.0231016	0.0295127	0.0267462	0.0292018	0.00500168
PC 35:1/PC O-36:1	0.0296413	0.033912	0.0185332	0.040282	0.0321446	0.0309026	0.0079556	0.022364	0.0264209	0.0232882	0.0295866	0.0457173	0.0294754	0.00951307
PC 35:2/PC O-36:2	0.0909241	0.100367	0.0683188	0.086405	0.0667656	0.0825561	0.0146126	0.0544043	0.0677976	0.0436842	0.0504944	0.0858891	0.0604539	0.0167174
PC 35:3/PC O-36:3/PC P-36:2	0.031588	0.0360947	0.018357	0.0257389	0.0208165	0.026519	0.00736776	0.0209583	0.031029	0.0116357	0.0134273	0.023393	0.0200887	0.00786118
PC 35:4/PC O-36:4/PC P-36:3	0.0347938	0.0360716	0.032442	0.0364306	0.0313093	0.0342095	0.00225153	0.039224	0.0362903	0.0307828	0.0257857	0.0461104	0.0356386	0.0078038
PC 36:0/PC 37:7/PC O-38:7/PC P-38:6	0.0202676	0.0294383	0.0139824	0.0120637	0.0148627	0.0181229	0.00702005	0.0178349	0.0187113	0.0151457	0.0126524	0.0120173	0.0152723	0.00299452
PC 36:1	0.140097	0.160116	0.0720799	0.195134	0.146804	0.142846	0.0448981	0.206557	0.191023	0.178403	0.190576	0.205078	0.194327	0.0116586
PC 36:2	2.2012	2.7092	1.13286	1.84517	2.00511	1.97871	0.573828	2.02961	1.95899	1.5229	1.31888	1.37602	1.64128	0.331687
PC 36:3	0.980554	1.32848	0.636263	1.05329	0.977602	0.995238	0.246886	1.03581	1.06764	0.72238	0.852606	0.915049	0.918697	0.140375
PC 36:4	3.9933	4.28807	2.52666	3.43138	3.48856	3.5456	0.671982	3.85105	4.42174	2.63843	2.92637	2.78133	3.32378	0.775471
PC 36:5	0.227132	0.263109	0.133485	0.229832	0.228002	0.216312	0.0487	0.204302	0.266056	0.174679	0.222322	0.159277	0.205327	0.0419459
PC 37:4/PC O-38:4/PC P-38:3	0.0770054	0.0726306	0.0525912	0.0574214	0.050199	0.0619695	0.0121132	0.0537247	0.0762816	0.0366762	0.036337	0.0690171	0.0544073	0.0182574
PC 37:5/PC O-38:5/PC P-38:4	0.0292031	0.0357318	0.0278677	0.0258265	0.0216089	0.0280476	0.00516731	0.0304418	0.034927	0.0263593	0.0206816	0.0270927	0.0279005	0.00526712
PC 37:6/PC O-38:6/PC P-38:5	0.0199021	0.0152916	0.0130074	0.0152181	0.0125188	0.0151876	0.00292037	0.0135053	0.0139142	0.0118647	0.00876996	0.0192186	0.0134546	0.00380498
PC 38:2	0.0830424	0.0926701	0.0305246	0.0661312	0.0722011	0.0689139	0.02375	0.0583959	0.0769498	0.0460879	0.0516013	0.0508861	0.0567842	0.0120966
PC 38:3	0.255121	0.280789	0.140721	0.245494	0.242453	0.232916	0.0536982	0.236999	0.338301	0.156648	0.174487	0.154146	0.212116	0.0780946
PC 38:4	2.12361	1.89709	0.934998	1.38519	1.32965	1.53411	0.474916	1.7163	2.12118	1.08844	1.1354	1.50718	1.5137	0.428391
PC 38:5	0.784445	0.814571	0.537028	0.566707	0.54929	0.650408	0.136932	0.749327	0.870775	0.477446	0.489689	0.470974	0.611642	0.186263
PC 38:6	2.60205	2.64191	1.65609	1.96081	2.28945	2.23007	0.422333	2.37609	2.80137	1.47593	1.72142	1.9405	2.06306	0.529042
PC 38:7/PC 37:0/PC O-38:0	0.0727756	0.0949292	0.0588885	0.0629111	0.0664597	0.0711928	0.0142154	0.0799447	0.0945013	0.0506387	0.0540129	0.0486587	0.0655513	0.0205314
PC 38:8/PC 37:1/PC O-38:1/PC P-38:0	0.009105	0.0101491	0.00615437	0.00961069	0.00674688	0.0083532	0.00178793	0.00629959	0.00967511	0.00514787	0.0067894	0.00791386	0.00716517	0.00171903
PC 38:9/PC 37:2/PC O-38:2/PC P-38:1	0.0508602	0.0458627	0.0278874	0.0368847	0.0295892	0.0382168	0.0100153	0.0237328	0.0385	0.0158723	0.0189185	0.0235552	0.0241158	0.00869387
PC 39:4/PC O-40:4/PC P-40:3	0.0348413	0.0309694	0.0209473	0.0235452	0.0206145	0.0261835	0.00638853	0.0184401	0.030563	0.0127353	0.0138762	0.0165501	0.0184329	0.00713989
PC 40:4	0.0479632	0.0472367	0.0259368	0.0357982	0.0330049	0.037988	0.00948554	0.0364741	0.0534492	0.039237	0.0301455	0.026671	0.0371954	0.0103603
PC 40:5	0.0669367	0.0750588	0.0426903	0.057678	0.059673	0.0604074	0.0120331	0.087787	0.0889812	0.0571993	0.0592482	0.0785258	0.0743483	0.0152829
PC 40:6	0.456364	0.48586	0.305011	0.371883	0.428576	0.409539	0.071979	0.547192	0.51147	0.475378	0.412866	0.487754	0.486932	0.0496321
PC 40:7	0.25725	0.256389	0.172475	0.182416	0.167337	0.207173	0.0456444	0.285584	0.291168	0.132188	0.113326	0.141362	0.192726	0.0879217
PC 40:8/PC 39:1/PC O-40:1/PC P-40:0	0.109482	0.100271	0.141322	0.0780225	0.083675	0.102555	0.0250718	0.0772216	0.105694	0.0788257	0.0588512	0.0528365	0.0746857	0.0206953

## Sheet: PE
PE - Intensity normalised to IS	Control_8wo							Cdk1 cKO_8wo
	Control 1	Control 2	Control 3	Control 4	Control 5	Average	Std. Dev.	KO 1	KO 2	KO 3	KO 4	KO 5	Average	Std. Dev.
PE 28:0 (IS)	1	1	1	1	1	1	0	1	1	1	1	1	1	0
PE 32:0	0.0104485	0.0114368	0.0151457	0.0154067	0.0118634	0.0128602	0.0022663	0.0241286	0.0143919	0.0196271	0.0172259	0.013297	0.0177341	0.00434714
PE 32:1	0.0285228	0.030103	0.0213278	0.0500859	0.0383502	0.0336779	0.0109879	0.0668088	0.0526233	0.0632535	0.0911411	0.0334081	0.061447	0.0210819
PE 33:1/PE O-34:1/PE P-34:0	0.0135588	0.0141426	0.0115308	0.021193	0.0191134	0.0159077	0.00406209	0.0206823	0.0167591	0.0205407	0.0167736	0.016234	0.0181979	0.00221455
PE 34:0	0.00914993	0.0125089	0.0120333	0.00858176	0.0109374	0.0106423	0.00173055	0.0176021	0.0105077	0.0124826	0.017626	0.0093855	0.0135208	0.00389767
PE 34:1	0.252075	0.219161	0.166636	0.334894	0.25767	0.246087	0.0614294	0.411022	0.317858	0.411639	0.50792	0.311068	0.391901	0.0809813
PE 34:2	1.51219	1.51644	0.820604	1.41115	1.10727	1.27353	0.303187	1.48063	1.29332	1.39404	1.67877	1.29497	1.42835	0.160192
PE 34:3	0.136828	0.119866	0.0486452	0.114021	0.0940464	0.102681	0.033854	0.125012	0.119261	0.106305	0.140534	0.0929544	0.116813	0.0181352
PE 35:1/PE O-36:1/PE P-36:0	0.0131111	0.0124655	0.0111613	0.0179175	0.0116049	0.0132521	0.00271523	0.0149881	0.0150688	0.0141566	0.0146153	0.0150621	0.0147782	0.00039434
PE 35:2/PE O-36:2/PE P-36:1	0.0518102	0.0477395	0.0337941	0.0432554	0.0366357	0.042647	0.00749628	0.0321833	0.0382656	0.0334111	0.040577	0.057897	0.0404668	0.0103328
PE 35:3/PE O-36:3/PE P-36:2	0.0130733	0.0132206	0.00912809	0.0119696	0.00987444	0.0114532	0.00186505	0.00897803	0.0114826	0.00694464	0.00844733	0.010719	0.00931433	0.00181347
PE 35:4/PE O-36:4/PE P-36:3	0.0148823	0.0160777	0.0095454	0.0122288	0.0112243	0.0127917	0.00266836	0.0147793	0.014225	0.0142275	0.0156032	0.0254374	0.0168545	0.00483098
PE 35:5/PE O-36:5/PE P-36:4	0.0132843	0.00926809	0.00804182	0.00811605	0.00836176	0.00941441	0.00221784	0.00880649	0.0115976	0.00703842	0.0124841	0.00985767	0.00995686	0.0021754
PE 36:1	0.0680631	0.0455371	0.0672167	0.0883544	0.0904599	0.0719262	0.0183499	0.108365	0.0764996	0.15374	0.109527	0.103126	0.110252	0.0277729
PE 36:2	1.00732	1.20936	0.685292	0.901118	0.849009	0.93042	0.194484	1.15781	0.923632	1.06327	1.20928	1.07734	1.08627	0.108752
PE 36:3	0.743889	0.832733	0.386437	0.602663	0.527628	0.61867	0.176054	0.729706	0.659428	0.472589	0.554969	0.597268	0.602792	0.0982155
PE 36:4	2.29314	2.67508	1.71957	2.41204	2.18085	2.25614	0.351696	2.78463	2.93756	2.32893	3.29269	2.29486	2.72773	0.422155
PE 36:5	0.171181	0.175535	0.0845607	0.151847	0.136581	0.143941	0.036684	0.177843	0.202366	0.112557	0.182043	0.127912	0.160544	0.0383348
PE 36:6	0.0110556	0.0119091	0.00477973	0.00746489	0.00701707	0.00844528	0.00296856	0.0116559	0.010839	0.00612528	0.0103227	0.00952257	0.00969311	0.00214014
PE 37:2/PE O-38:2/PE P-38:1	0.0238161	0.0201168	0.0166562	0.0193063	0.0138746	0.018754	0.00374154	0.0156872	0.0210737	0.0154697	0.0164457	0.0157438	0.016884	0.00237058
PE 37:3/PE O-38:3/PE P-38:2	0.00857518	0.011919	0.00783911	0.00935861	0.00540819	0.00862003	0.00236414	0.00521935	0.0112221	0.0106486	0.0102949	0.00978832	0.00943464	0.00241363
PE 37:4/PE O-38:4/PE P-38:3	0.112828	0.112974	0.102411	0.122635	0.101076	0.110385	0.00884558	0.118386	0.130071	0.0983068	0.107842	0.147647	0.12045	0.0192728
PE 37:5/PE O-38:5/PE P-38:4	0.0283238	0.0339381	0.023247	0.0248508	0.0250407	0.0270801	0.00425444	0.028363	0.0334183	0.0250221	0.0268078	0.035604	0.029843	0.00448932
PE 37:6/PE O-38:6/PE P-38:5	0.02793	0.0241688	0.0203719	0.0221597	0.0170171	0.0223295	0.00408749	0.0243828	0.0233595	0.0186426	0.023198	0.0376807	0.0254527	0.00718526
PE 38:1/PE 39:8/PE O-40:8/PE P-40:7	0.0173451	0.0151932	0.00981966	0.0132267	0.0132372	0.0137644	0.00278348	0.0172329	0.018634	0.0174274	0.0168319	0.0147133	0.0169679	0.00142819
PE 38:2	0.0655936	0.069096	0.0491566	0.0522296	0.0569633	0.0586078	0.00853687	0.0764289	0.0663002	0.0535624	0.0645905	0.0375877	0.0596939	0.0147814
PE 38:3	0.123617	0.240779	0.0811194	0.137763	0.142185	0.145093	0.0586767	0.22258	0.240813	0.195751	0.188075	0.200688	0.209582	0.0216636
PE 38:4	6.43612	6.89122	4.35886	4.75518	5.93377	5.67503	1.08441	7.50716	7.38756	5.6477	6.68422	5.85568	6.61647	0.852911
PE 38:5	1.73407	1.93955	1.06385	1.42981	1.35035	1.50353	0.34113	2.08707	1.96869	1.24468	1.66669	1.63046	1.71952	0.329157
PE 38:6	4.39293	4.24368	2.75626	2.9614	3.42467	3.55579	0.738875	4.77151	4.42205	3.61436	4.27098	4.34788	4.28536	0.421126
PE 38:7/PE 37:0/PE O-38:0	0.118011	0.125262	0.0698596	0.0766964	0.0857785	0.0951214	0.0249865	0.125547	0.136059	0.0677064	0.100058	0.0885329	0.103581	0.027673
PE 39:5/PE O-40:5/PE P-40:4	0.0211487	0.0214257	0.0176549	0.0202759	0.0166381	0.0194286	0.00215627	0.0210169	0.024991	0.0215133	0.0204828	0.0255025	0.0227013	0.00235902
PE 39:6/PE O-40:6/PE P-40:5	0.0539386	0.0525273	0.0512376	0.0436213	0.0394013	0.0481452	0.00630975	0.0487847	0.0512157	0.0470938	0.045249	0.0778561	0.0540399	0.0134938
PE 40:3	0.0139334	0.0131686	0.00645588	0.00732785	0.00663942	0.00950504	0.00371759	0.0128531	0.0159634	0.00677851	0.0122175	0.0100227	0.011567	0.00341762
PE 40:4	0.105945	0.135102	0.102906	0.102174	0.107795	0.110784	0.0137832	0.13497	0.132543	0.150513	0.140432	0.110802	0.133852	0.0146214
PE 40:5	0.172417	0.169753	0.131873	0.150993	0.137186	0.152444	0.0184158	0.227196	0.2119	0.232642	0.237727	0.240804	0.230054	0.0113894
PE 40:6	0.85489	1.06294	0.979853	0.821598	1.02004	0.947865	0.104955	1.69075	1.17002	1.61809	1.44365	1.66001	1.51651	0.216007
PE 40:7	0.591395	0.667546	0.397016	0.35137	0.413781	0.484222	0.137214	0.783514	0.683652	0.425311	0.486145	0.533581	0.582441	0.147499
PE 40:8	0.0750947	0.0794431	0.0993373	0.0483003	0.0553086	0.0714968	0.0203182	0.0680614	0.0821687	0.0601036	0.0456866	0.0470078	0.0606056	0.0152339
PE 41:0/PE 42:7	0.0228055	0.0250534	0.0140661	0.00974103	0.0141679	0.0171668	0.00647579	0.0276701	0.0249826	0.0177624	0.0159557	0.0128554	0.0198453	0.00624391
PE 41:1/PE 42:8/PE O-42:1/PE P-42:0	0.0135478	0.0145176	0.010321	0.00590747	0.00679393	0.0102175	0.00386941	0.0152321	0.0124735	0.00926486	0.0103559	0.00901991	0.0112692	0.00260122
PE 41:6/PE O-42:6/PE P-42:5	0.0246034	0.0189682	0.0239148	0.0165879	0.0189255	0.0206	0.00348493	0.0203477	0.0246577	0.017832	0.0224753	0.0183191	0.0207264	0.00286485
PE 42:4	0.00489086	0.00705925	0.0044386	0.00343005	0.00376884	0.00471752	0.00142733	0.00629907	0.00554726	0.00779029	0.00686612	0.00459779	0.00622011	0.00122205
PE 42:5	0.00831745	0.0126007	0.00734951	0.00532202	0.00739806	0.00819756	0.00269395	0.00885706	0.0107943	0.00946309	0.00748756	0.00882724	0.00908584	0.00119737
PE 42:6	0.0207787	0.0197849	0.0136981	0.0129039	0.0158489	0.0166029	0.0035444	0.0216142	0.0221175	0.0209562	0.0244167	0.0182901	0.0214789	0.00220784

## Sheet: PS
PS - Intensity normalised to IS	Control_8wo							Cdk1 cKO_8wo
	Control 1	Control 2	Control 3	Control 4	Control 5	Average	Std. Dev.	KO 1	KO 2	KO 3	KO 4	KO 5	Average	Std. Dev.
PS 28:0 (IS)	1	1	1	1	1	1	0	1	1	1	1	1	1	0
PS 36:0	0.00273641	0.000595347	0.00193879	0.000908877	0	0.00123588	0.00109434	0.00228458	0.00501646	0.00328048	0.001276	0.00215008	0.00280152	0.00142778
PS 36:1	0.151712	0.227993	0.0541447	0.155054	0.139082	0.145597	0.0618909	0.315391	0.204874	0.200799	0.329999	0.378898	0.285992	0.0794836
PS 36:2	0.198211	0.234639	0.0594953	0.194076	0.129333	0.163151	0.0692538	0.235686	0.245656	0.104548	0.219386	0.24558	0.210171	0.0600108
PS 36:3	0.0177239	0.0239865	0.00733805	0.0231638	0.0161915	0.0176807	0.00668987	0.0277958	0.0250078	0.00964304	0.0240505	0.0255521	0.0224098	0.00726832
PS 36:4	0.302123	0.336777	0.0593186	0.203105	0.166301	0.213525	0.110859	0.228497	0.310204	0.0591752	0.201835	0.162896	0.192522	0.092045
PS 38:2	0.0226635	0.0271692	0.00711957	0.0157509	0.0157115	0.0176829	0.00764851	0.0223812	0.0281122	0.0119181	0.019957	0.0190864	0.020291	0.0058568
PS 38:3	0.184067	0.227159	0.0400638	0.164016	0.133616	0.149784	0.0701154	0.225371	0.211418	0.0688537	0.181325	0.203584	0.178111	0.0631254
PS 38:4	2.64407	2.66408	0.405338	1.49778	1.44712	1.73168	0.948248	2.36493	2.87975	0.594601	1.85681	1.8154	1.9023	0.849873
PS 38:5	0.103429	0.135451	0.0230354	0.0876462	0.0664484	0.083202	0.0420106	0.107977	0.122637	0.0242264	0.0868715	0.0934476	0.087032	0.0377232
PS 38:6	0.386393	0.404407	0.0449242	0.22462	0.179021	0.247873	0.150133	0.291449	0.341047	0.0583902	0.296468	0.236971	0.244865	0.110588
PS 40:3	0.00723098	0.0119919	0.00222237	0.00569066	0.00619354	0.00666589	0.00352152	0.00936287	0.0115203	0.00609518	0.0105188	0.0103789	0.00957522	0.00209018
PS 40:4	0.167941	0.213409	0.0372531	0.14169	0.12442	0.136942	0.0650488	0.220337	0.213828	0.0778236	0.215392	0.219648	0.189406	0.0624372
PS 40:5	0.168668	0.239273	0.0326764	0.137283	0.0864617	0.132873	0.078764	0.227583	0.193864	0.0741695	0.211838	0.201119	0.181715	0.0614439
PS 40:6	1.52316	1.6828	0.167363	0.926212	0.830351	1.02598	0.604989	1.59418	1.41903	0.386917	1.7254	1.6353	1.35217	0.550957
PS 40:7	0.0618793	0.0757276	0.0101932	0.0358953	0.0322975	0.0431986	0.0258294	0.0623229	0.0684059	0.0129727	0.0462997	0.0533691	0.0486741	0.0216674
PS 42:4	0.00882851	0.0100402	0.00227102	0.00701318	0.00542711	0.00671601	0.00304223	0.00991253	0.0101778	0.0038585	0.00925279	0.0105692	0.00875416	0.00277844
PS 42:6	0.0255912	0.0275378	0.00266835	0.0129832	0.0115486	0.0160658	0.0103892	0.016468	0.0209177	0.00512922	0.0207461	0.0152619	0.0157046	0.0064267
