# Supplementary material for: Remodeling of whole-body lipid metabolism and a diabetic-like phenotype caused by loss of CDK1 and hepatocyte division
Source: eLife. 2020 Dec 21;9:e63835. doi: 10.7554/eLife.63835 (PMC7771968; doi:10.7554/eLife.63835)
Supplement: Supplementary file 2. [file elife-63835-supp2.xlsx]

## Sheet: AcylCarnitine
Acylcarnitine - Intensity normalised to IS	Control_8wo_isolated hepatocytes					Cdk1 cKO_8wo_isolated hepatocytes
	Control 1	Control 2	Control 3	Average	Std. Dev.	KO 1	KO 2	KO 3	Average	Std. Dev.
AcylCarnitine 16:0-d3 (IS)	1	1	1	1	0	1	1	1	1	0
AcylCarnitine 16:1	0.192099	0.154105	0.159423	0.168542	0.0205735	0.362897	0.936691	0.434638	0.578075	0.312635
AcylCarnitine 16:0	0.6805	1.10787	0.500046	0.762805	0.312158	1.30561	2.35553	1.41484	1.69199	0.577227
AcylCarnitine 18:2	0.581542	0.631948	0.507415	0.573635	0.0626417	1.0905	1.40011	1.32131	1.27064	0.160906
AcylCarnitine 18:1	0.638099	0.703397	0.636482	0.659326	0.0381756	2.04414	4.18706	1.5016	2.5776	1.41998
AcylCarnitine 18:0	0.445643	0.895857	0.40476	0.582087	0.272501	0.84978	1.28565	0.912116	1.01585	0.235722
AcylCarnitine 20:4	0.307267	0.313807	0.296003	0.305692	0.00900577	0.383259	0.789198	0.425218	0.532558	0.223245
AcylCarnitine 22:6	0.0518738	0.0534264	0.0556318	0.053644	0.00188843	0.0682869	0.143697	0.128818	0.113601	0.0399418

## Sheet: LPC
LPC - Intensity normalised to IS	Control_8wo_isolated hepatocytes					Cdk1 cKO_8wo_isolated hepatocytes
	Control 1	Control 2	Control 3	Average	Std. Dev.	KO 1	KO 2	KO 3	Average	Std. Dev.
LPC 20:0 (IS)	1	1	1	1	0	1	1	1	1	0
LPC 15:0/LPC O-16:0	0.0031064	0.00136216	0.00272028	0.00239628	0.000916147	0.00130492	0.00257759	0.0012806	0.00172104	0.000741898
LPC 16:1	0.0355429	0.00620167	0.0385236	0.0267561	0.0178629	0.00376581	0.0203563	0.0077976	0.0106399	0.00865275
LPC 16:0	0.704179	0.379318	0.799112	0.627536	0.220142	0.233823	0.73098	0.282671	0.415825	0.274023
LPC 17:0/LPC O-18:0	0.011672	0.00622742	0.0109991	0.00963283	0.0029683	0.00631548	0.0095715	0.00548736	0.00712478	0.002159
LPC 18:3	0.014515	0.00290089	0.0177575	0.0117245	0.00781154	0.00142953	0.0100553	0.00232344	0.00460275	0.00474313
LPC 18:2	0.91227	0.16955	1.16613	0.749316	0.517888	0.0987531	0.683046	0.118727	0.300175	0.331726
LPC 18:1	0.494733	0.0936625	0.480491	0.356296	0.227558	0.0741873	0.310547	0.0956624	0.160132	0.130705
LPC 18:0 or PAF 16:0	0.501639	0.429778	0.614677	0.515365	0.0932107	0.224026	0.513376	0.224188	0.32053	0.16701
LPC 20:5	0.00621356	0.000923539	0.00845045	0.00519585	0.00386528	0.000379146	0.0027294	0.000634355	0.00124763	0.00128957
LPC 20:4	0.570786	0.107294	0.62731	0.43513	0.285317	0.0433132	0.437279	0.0721817	0.184258	0.219597
LPC 20:3	0.127732	0.0185407	0.148427	0.0982333	0.0697872	0.00736971	0.0631747	0.0130971	0.0278805	0.0306995
LPC 20:2	0.0181732	0.00409836	0.0150246	0.0124321	0.00738688	0.00400303	0.0130443	0.00411108	0.0070528	0.00518907
LPC 20:1	0.00895962	0.00330142	0.00976208	0.00734104	0.00352135	0.00437081	0.00846334	0.00352814	0.0054541	0.00263992
LPC 22:6	0.30602	0.0778818	0.387984	0.257296	0.160691	0.0433601	0.329795	0.057858	0.143671	0.161351
LPC 22:5	0.0253531	0.00486535	0.0253324	0.0185169	0.0118226	0.00292532	0.0156253	0.0033374	0.00729602	0.00721635
LPC 22:4	0.00479746	0.000879839	0.00461226	0.00342985	0.00221032	0.000681922	0.0033639	0.000894187	0.00164667	0.00149095
LPC 22:0	0.00606538	0.00877863	0.00592611	0.00692337	0.00160821	0.00502031	0.00732719	0.0058013	0.0060496	0.00117331
LPC 24:6	0.00178958	0.00103386	0.00176357	0.001529	0.000429006	0.000643613	0.00133459	0.000779547	0.000919249	0.000366059

## Sheet: LPE
LPE - Intensity normalised to IS	Control_8wo_isolated hepatocytes					Cdk1 cKO_8wo_isolated hepatocytes
	Control 1	Control 2	Control 3	Average	Std. Dev.	KO 1	KO 2	KO 3	Average	Std. Dev.
LPE 14:0 (IS)	1	1	1	1	0	1	1	1	1	0
LPE 16:1	0.0854599	0.0159515	0.0912078	0.0642064	0.0418887	0.00934281	0.0469462	0.0209636	0.0257509	0.0192534
LPE 16:0	1.93923	0.985934	2.22817	1.71778	0.650053	0.539008	1.46125	0.607649	0.869302	0.513788
LPE 18:2	0.905557	0.181577	1.03834	0.70849	0.461124	0.127447	0.76518	0.138329	0.343652	0.365094
LPE 18:1	1.42164	0.373609	1.51318	1.10281	0.633162	0.278832	0.943857	0.395671	0.539453	0.355063
LPE 18:0	1.70372	1.35089	2.1554	1.73667	0.40327	0.74392	1.38808	0.726416	0.952804	0.377059
LPE 20:5	0.0386484	0.00984071	0.0523685	0.0336192	0.0217054	0.00411443	0.0250262	0.00553812	0.0115596	0.0116841
LPE 20:4	2.64023	0.602734	2.84539	2.02945	1.23982	0.311292	1.9814	0.471231	0.921306	0.921541
LPE 20:3	0.146463	0.0293273	0.159154	0.111648	0.0715736	0.0199586	0.100815	0.0213225	0.0473654	0.0462937
LPE 20:2	0.0332251	0.00772727	0.0296794	0.0235439	0.0138119	0.0107181	0.029614	0.00973679	0.0166896	0.0112036
LPE 20:1	0.0353566	0.0124712	0.0348862	0.0275713	0.0130792	0.0157364	0.0293536	0.0130289	0.019373	0.00874884
LPE 20:0	0.00523583	0.00283905	0.00488485	0.00431991	0.00129442	0.00447452	0.00370094	0.0025509	0.00357545	0.000967932
LPE 22:6	2.97664	0.796348	3.74795	2.50698	1.53083	0.632339	3.45624	0.624522	1.57103	1.63264

## Sheet: PG
PG - Intensity normalised to IS	Control_8wo_isolated hepatocytes					Cdk1 cKO_8wo_isolated hepatocytes
	Control 1	Control 2	Control 3	Average	Std. Dev.	KO 1	KO 2	KO 3	Average	Std. Dev.
PG 28:0 (IS)	1	1	1	1	0	1	1	1	1	0
PG 32:1	0.224832	0.100477	0.182881	0.169397	0.0632646	0.0903172	0.173699	0.171398	0.145138	0.0474902
PG 34:3	0.548831	0.305923	0.516573	0.457109	0.13192	0.455837	0.493732	0.352784	0.434118	0.0729407
PG 34:2	5.31823	3.81998	5.10702	4.74841	0.810951	3.60127	5.89801	4.10215	4.53381	1.20768
PG 34:1	16.7586	16.9278	16.5838	16.7567	0.171984	12.8418	14.2275	12.0366	13.0353	1.10825
PG 34:0	0.117866	0.148161	0.0306405	0.0988892	0.0610153	0.020055	0.00958891	0	0.0098813	0.0100307
PG 36:5	0.152555	0.103223	0.150514	0.135431	0.0279111	0.114422	0.154673	0.0911819	0.120092	0.032123
PG 36:4	6.25478	3.89742	7.00879	5.72033	1.62308	8.32016	7.02914	3.81905	6.38945	2.31774
PG 36:3	3.64068	2.6434	3.83673	3.3736	0.639925	3.62676	3.51781	2.09386	3.07948	0.855302
PG 36:2	4.59715	5.85504	4.58826	5.01348	0.728823	4.74333	5.36439	3.2129	4.4402	1.10731
PG 36:1	0.781725	1.0726	0.770361	0.874896	0.171313	0.566052	0.772442	0.574377	0.637624	0.11683
PG 36:0	0.0195692	0.0320529	0.0213642	0.0243288	0.00674925	0.0312372	0.00971825	0.0145568	0.0185041	0.0112894
PG 38:6	0.298984	0.194289	0.284307	0.259193	0.0566855	0.334494	0.356879	0.236294	0.309222	0.0641418
PG 38:5	0.483349	0.210682	0.392689	0.36224	0.138861	0.463486	0.583267	0.276565	0.441106	0.154571
PG 38:4	1.06592	0.870515	1.01447	0.983636	0.101286	1.19241	1.36482	0.668712	1.07531	0.362526
PG 40:8	0.0762876	0.0614689	0.0719366	0.0698977	0.00761685	0.0673219	0.101138	0.0732219	0.0805605	0.0180629
PG 40:7	0.157435	0.0670043	0.119641	0.114693	0.0454177	0.148471	0.203764	0.0957871	0.149341	0.0539939
PG 40:6	0.158107	0.155643	0.162134	0.158628	0.00327637	0.178966	0.193732	0.117903	0.163533	0.040201

## Sheet: PI
PI - Intensity normalised to IS	Control_8wo_isolated hepatocytes					Cdk1 cKO_8wo_isolated hepatocytes
	Control 1	Control 2	Control 3	Average	Std. Dev.	KO 1	KO 2	KO 3	Average	Std. Dev.
PI 12:0/13:0 (IS)	1	1	1	1	0	1	1	1	1	0
PI 34:3	0.0974287	0.0348743	0.0489455	0.0604162	0.0328168	0.0548133	0.104006	0.0757283	0.0781824	0.0246879
PI 34:2	0.671322	0.287296	0.324549	0.427722	0.211784	0.507643	1.14253	0.554147	0.734773	0.353892
PI 34:1	0.112684	0.0518947	0.0547174	0.0730985	0.0343107	0.0690968	0.134025	0.0839699	0.0956973	0.0340158
PI 36:5	0.564696	0.282804	0.467076	0.438192	0.143149	0.362787	0.476197	0.454316	0.4311	0.0601642
PI 36:4	29.3059	22.4665	23.9076	25.2267	3.60543	26.5207	25.1557	22.3866	24.6877	2.10644
PI 36:3	1.9174	0.623711	0.9059	1.149	0.680242	0.979624	1.66283	1.08964	1.24403	0.366838
PI 36:2	0.706408	0.46591	0.481576	0.551298	0.134557	0.493214	0.727845	0.476909	0.565989	0.140408
PI 36:1	0.0619055	0.0396319	0.0565302	0.0526892	0.011623	0.0410014	0.0660208	0.0585814	0.0552012	0.0128477
PI 38:6	1.13611	0.538779	0.739119	0.804671	0.304015	0.727552	0.934095	0.847317	0.836321	0.10371
PI 38:5	16.2771	9.5066	12.0561	12.6133	3.41945	14.0813	12.9142	11.8674	12.9543	1.10752
PI 38:4	126.404	151.594	122.563	133.52	15.7698	110.958	128.89	100.766	113.538	14.2381
PI 38:3	2.06947	1.89252	2.36915	2.11038	0.240935	1.4821	1.92988	1.26637	1.55945	0.338452
PI 38:2	0.506587	0.40198	0.388822	0.432463	0.0645291	0.289962	0.330842	0.343395	0.3214	0.0279397
PI 40:8	0.142161	0.110343	0.139684	0.130729	0.0176984	0.136962	0.177875	0.120699	0.145179	0.0294601
PI 40:7	0.0911246	0.04967	0.0611653	0.06732	0.0214017	0.053704	0.0980034	0.0755242	0.0757439	0.0221505
PI 40:6	0.281123	0.170611	0.204896	0.218876	0.0565668	0.319588	0.344338	0.223375	0.295767	0.0639028
PI 40:5	0.354583	0.211811	0.248715	0.271703	0.0741098	0.467047	0.331993	0.272405	0.357148	0.0997296
PI 40:4	0.280912	0.189293	0.221117	0.230441	0.046516	0.337336	0.319907	0.220327	0.292523	0.0631285

## Sheet: SM
SM - Intensity normalised to IS	Control_8wo_isolated hepatocytes					Cdk1 cKO_8wo_isolated hepatocytes
	Control 1	Control 2	Control 3	Average	Std. Dev.	KO 1	KO 2	KO 3	Average	Std. Dev.
SM 30:1 (IS)	1	1	1	1	0	1	1	1	1	0
SM 32:1	0.0410286	0.0475741	0.0416276	0.0434101	0.00361857	0.0351126	0.0426104	0.032649	0.0367907	0.00518837
SM 33:1	0.158086	0.183288	0.144814	0.162063	0.0195426	0.161074	0.137143	0.120403	0.13954	0.020441
SM 34:2	0.0871438	0.107258	0.088294	0.0942318	0.0112953	0.0935648	0.108208	0.077604	0.0931256	0.0153067
SM 34:1	5.68337	7.81613	5.1993	6.23293	1.39229	6.16656	6.69381	4.76199	5.87412	0.998563
SM 34:0	0.167653	0.141266	0.083379	0.130766	0.0431069	0.139802	0.172854	0.107282	0.139979	0.0327862
SM 35:1	0.0654803	0.0856154	0.054752	0.0686159	0.0156688	0.0661235	0.0687204	0.0547022	0.063182	0.00745763
SM 36:2	0.0387776	0.045833	0.0402196	0.0416101	0.00372754	0.0273513	0.0467798	0.0273218	0.0338176	0.0112256
SM 36:1	0.721884	1.03049	0.668877	0.807084	0.195282	0.365984	0.798974	0.517233	0.56073	0.219748
SM 36:0	0.0771848	0.0663782	0.0593101	0.0676244	0.00900225	0.0369175	0.0593069	0.0434246	0.0465497	0.0115172
SM 37:2	0.00506955	0.00543264	0.00476318	0.00508846	0.00033513	0.00410792	0.00583487	0.00396163	0.00463481	0.00104186
SM 37:1	0.0597062	0.0601883	0.0511931	0.0570292	0.00505994	0.0482811	0.0617164	0.0440904	0.0513626	0.00920821
SM 37:0	0.0140679	0.0111183	0.00917772	0.0114547	0.00246239	0.00958435	0.0108729	0.00992998	0.0101291	0.000666969
SM 38:2	0.0933472	0.0811889	0.0922296	0.0889219	0.00672024	0.0646812	0.100664	0.0707037	0.0786831	0.019273
SM 38:1	1.56855	1.70893	1.42966	1.56905	0.13964	1.49931	1.77842	1.21102	1.49625	0.283712
SM 39:1	0.224068	0.217515	0.224973	0.222185	0.00406965	0.2078	0.217989	0.185778	0.203856	0.0164638
SM 40:2	1.0066	0.792169	0.832252	0.877008	0.114008	0.8376	0.973177	0.681821	0.830866	0.145795
SM 40:1	4.83101	4.99705	5.09065	4.9729	0.131495	4.37476	4.75156	3.48098	4.20243	0.652586
SM 40:0	0.158326	0.212532	0.0883247	0.153061	0.0622706	0.16504	0.114639	0.127574	0.135751	0.0261766
SM 41:2	0.4799	0.409958	0.460871	0.450243	0.0361619	0.457645	0.407223	0.33461	0.399826	0.06185
SM 41:1	2.38538	2.27678	2.67505	2.44574	0.20588	2.56588	2.05757	1.92683	2.18342	0.337603
SM 41:0	0.0344698	0.0830564	0.0586586	0.0587282	0.0242934	0.0430126	0.0863853	0.0508374	0.0600784	0.0231159
SM 42:3	2.61867	2.61913	2.00596	2.41459	0.35388	2.11191	2.52153	1.75401	2.12915	0.384055
SM 42:2	11.901	14.2357	10.5839	12.2402	1.84938	12.0924	11.471	8.86704	10.8101	1.71121
SM 42:1	3.81456	4.12741	4.4565	4.13283	0.321004	4.05126	3.78478	3.44124	3.75909	0.305817
SM 42:0	0.0739272	0.108199	0.0762625	0.0861297	0.0191486	0.0779143	0.0595711	0.0525342	0.0633398	0.0131031
SM 43:2	0.147349	0.165826	0.144201	0.152459	0.0116831	0.170249	0.135861	0.121074	0.142394	0.02523
SM 43:1	0.194484	0.205811	0.225487	0.208594	0.0156876	0.233257	0.200399	0.201406	0.211687	0.0186867
SM 43:0	0.0844841	0.0976018	0.082141	0.0880756	0.00833265	0.067709	0.0756438	0.0572873	0.06688	0.0092063
SM 44:2	0.0323501	0.0367222	0.029003	0.0326918	0.00387091	0.0326006	0.0309445	0.0259834	0.0298428	0.00344338
SM 44:1	0.0202932	0.0237047	0.0247895	0.0229292	0.00234637	0.0203062	0.0228654	0.0206393	0.0212703	0.00139135

## Sheet: PC
PC - Intensity normalised to IS	Control_8wo_isolated hepatocytes					Cdk1 cKO_8wo_isolated hepatocytes
	Control 1	Control 2	Control 3	Average	Std. Dev.	KO 1	KO 2	KO 3	Average	Std. Dev.
PC 28:0 (IS)	1	1	1	1	0	1	1	1	1	0
PC 30:0	0.0223431	0.0142235	0.0133324	0.016633	0.00496514	0.0125001	0.0207724	0.0159948	0.0164224	0.00415272
PC 31:0/PC O-32:0	0.0317635	0.0201167	0.0169248	0.022935	0.00781049	0.0214513	0.0335621	0.0184839	0.0244991	0.0079878
PC 32:2	0.0912286	0.0569153	0.0733809	0.0738416	0.0171613	0.0550013	0.079807	0.0669204	0.0672429	0.012406
PC 32:1	0.711005	0.370342	0.504035	0.52846	0.17164	0.269826	0.408974	0.387317	0.355372	0.0748727
PC 32:0	0.469854	0.330431	0.270656	0.35698	0.102219	0.305394	0.54147	0.304947	0.383937	0.136428
PC 33:2/PC O-34:2/PC P-34:1	0.089666	0.0657017	0.0626207	0.0726628	0.0148056	0.0892225	0.0684766	0.0615194	0.0730728	0.0144122
PC 33:1/PC O-34:1	0.161375	0.0881901	0.0763062	0.108624	0.0460686	0.098876	0.0955895	0.0773661	0.0906105	0.0115871
PC 33:0	0.0171534	0.0113652	0.0103266	0.0129484	0.00367846	0.0101995	0.0132103	0.0109497	0.0114532	0.00156727
PC 34:4	0.0390223	0.0289376	0.0298091	0.0325897	0.00558784	0.0269948	0.037113	0.0305185	0.0315421	0.00513618
PC 34:3	0.86968	0.716976	0.717705	0.76812	0.0879539	0.553034	0.760109	0.622034	0.645059	0.10544
PC 34:2	15.2168	17.578	13.9438	15.5795	1.84406	17.5362	17.5502	11.9663	15.6842	3.21983
PC 34:1	8.52512	7.06297	6.82625	7.47145	0.920155	6.28202	6.4073	5.56953	6.08629	0.451883
PC 34:0	0.127389	0.0592078	0.0897872	0.0921279	0.0341507	0.130585	0.172394	0.0710175	0.124666	0.050947
PC 35:5/PC O-36:5/PC P-36:4	0.0139969	0.00971018	0.00932023	0.0110091	0.00259487	0.00863741	0.015751	0.00936705	0.0112518	0.00391345
PC 35:4/PC O-36:4/PC P-36:3	0.055983	0.0471253	0.0352335	0.0461139	0.0104117	0.0550815	0.0644948	0.0387201	0.0527655	0.0130425
PC 35:3/PC O-36:3/PC P-36:2	0.0742468	0.050628	0.0547525	0.0598758	0.0126154	0.0714926	0.0515597	0.0494976	0.0575166	0.0121474
PC 35:2/PC O-36:2	0.259055	0.20842	0.18186	0.216445	0.0392183	0.268148	0.190197	0.158996	0.20578	0.0562197
PC 35:1/PC O-36:1	0.121482	0.10482	0.0827551	0.103019	0.0194259	0.0963995	0.0767555	0.0705601	0.0812384	0.0134904
PC 36:7/PC 35:0/PC O-36:0	0.0077348	0.00597657	0.00537623	0.00636253	0.00122574	0.00604056	0.00597254	0.00462179	0.00554496	0.000800212
PC 36:6	0.0167917	0.0134009	0.0155811	0.0152579	0.00171833	0.0133821	0.0158487	0.0140488	0.0144265	0.00127595
PC 36:5	0.393763	0.289221	0.332517	0.338501	0.0525272	0.236415	0.294146	0.241992	0.257518	0.0318432
PC 36:4	8.70631	9.20986	7.97352	8.6299	0.621703	8.60017	10.3138	6.72774	8.54725	1.79363
PC 36:3	5.24582	3.74325	3.90106	4.29671	0.825732	3.99721	3.46326	3.28751	3.58266	0.369609
PC 36:2	9.52689	11.3597	9.45202	10.1129	1.08041	8.66536	8.54061	5.48621	7.56406	1.80055
PC 36:1	1.58805	1.50635	1.45441	1.51627	0.0673675	0.925426	0.830338	0.741485	0.832416	0.0919882
PC 36:0/PC 37:7/PC O-38:7/PC P-38:6	0.0446935	0.0509938	0.0354022	0.0436965	0.0078435	0.0501554	0.0578805	0.0249035	0.0443132	0.0172473
PC 37:6/PC O-38:6/PC P-38:5	0.0329612	0.0283935	0.0222146	0.0278565	0.00539341	0.0315951	0.0296609	0.0240944	0.0284501	0.00389419
PC 37:5/PC O-38:5/PC P-38:4	0.0624648	0.0441398	0.0377676	0.0481241	0.0128216	0.0488072	0.0618112	0.0418849	0.0508344	0.0101166
PC 37:4/PC O-38:4/PC P-38:3	0.178049	0.17235	0.126245	0.158881	0.0284074	0.221217	0.168631	0.135051	0.174966	0.0434308
PC 37:3/PC O-38:3/PC P-38:2	0.0907485	0.0704735	0.0666618	0.0759613	0.0129472	0.0881616	0.0598861	0.0495903	0.0658793	0.0199719
PC 38:9/PC 37:2/PC O-38:2/PC P-38:1	0.0854342	0.0736566	0.0762299	0.0784402	0.00619211	0.136458	0.073773	0.061718	0.0906498	0.0401267
PC 38:8/PC 37:1/PC O-38:1/PC P-38:0	0.0605957	0.065682	0.0725564	0.066278	0.00600257	0.0601414	0.0594313	0.0463104	0.0552944	0.00778841
PC 38:7/PC 37:0/PC O-38:0	0.134451	0.105023	0.111711	0.117062	0.015426	0.0940457	0.122221	0.100931	0.105733	0.0146885
PC 38:6	5.23335	6.17037	4.68115	5.36162	0.752852	5.43296	5.90749	4.44237	5.26094	0.747552
PC 38:5	2.71721	1.92499	1.88508	2.17576	0.469337	2.28105	2.14928	1.67673	2.03569	0.317766
PC 38:4	6.6838	8.64709	6.7513	7.36073	1.11453	6.69959	6.8154	4.4757	5.9969	1.31867
PC 38:3	1.28087	1.1685	1.18897	1.21278	0.0598482	0.954953	0.856112	0.624263	0.811776	0.169745
PC 38:2	0.218698	0.274257	0.236009	0.242988	0.0284295	0.329495	0.263611	0.199367	0.264158	0.0650658
PC 38:1/PC 39:8/PC O-40:8/PC P-40:7	0.10372	0.107401	0.121647	0.110922	0.00946814	0.111007	0.0922657	0.0757808	0.0930178	0.017625
PC 38:0/PC 39:7/PC O-40:7/PC P-40:6	0.0140268	0.0157834	0.00776578	0.0125253	0.00421444	0.0140792	0.017382	0.0136238	0.0150283	0.00205101
PC 39:6/PC O-40:6/PC P-40:5	0.0664312	0.0673178	0.0504229	0.0613906	0.00950867	0.0891491	0.0621364	0.0539117	0.0683991	0.0184346
PC 39:5/PC O-40:5/PC P-40:4	0.0428173	0.0428435	0.0299779	0.0385462	0.00742042	0.0431214	0.0348923	0.0280708	0.0353615	0.00753623
PC 39:4/PC O-40:4/PC P-40:3	0.0574346	0.0517647	0.0483428	0.052514	0.00459198	0.0802611	0.0528835	0.0419041	0.0583496	0.0197541
PC 40:10/PC 39:3/PC O-40:3/PC P-40:2	0.0218385	0.0276291	0.0230388	0.0241688	0.00305619	0.0228926	0.0188245	0.0145343	0.0187505	0.00417967
PC 40:9/PC 39:2/PC O-40:2/PC P-40:1	0.0106471	0.0111548	0.0085278	0.0101099	0.00139347	0.00879289	0.00786477	0.00583237	0.00749668	0.0015142
PC 40:8/PC 39:1/PC O-40:1/PC P-40:0	0.162663	0.122388	0.125678	0.13691	0.0223635	0.138589	0.153488	0.120746	0.137608	0.0163933
PC 40:7	0.797343	0.620562	0.551193	0.656366	0.126921	0.827246	0.722508	0.62162	0.723791	0.102819
PC 40:6	1.77188	2.63236	1.7396	2.04795	0.506378	2.00311	1.87074	1.31618	1.73001	0.364448
PC 40:5	0.266213	0.279722	0.242929	0.262955	0.0186116	0.277675	0.188083	0.152415	0.206057	0.064536
PC 40:4	0.0843116	0.0788458	0.0619259	0.0750278	0.011671	0.0797748	0.0675026	0.0479912	0.0650895	0.0160286
PC 40:3	0.0113379	0.0103039	0.0106528	0.0107649	0.000526077	0.0143421	0.0116377	0.00820127	0.0113937	0.00307766
PC 41:6/PC O-42:6/PC P-42:5	0.0166793	0.0183362	0.0154568	0.0168241	0.00144512	0.0255253	0.0167224	0.0141476	0.0187984	0.00596621
PC 41:5/PC O-42:5/PC P-42:4	0.00876102	0.0118449	0.00677579	0.00912724	0.00255432	0.00782916	0.0076283	0.00505471	0.00683739	0.00154711
PC 41:3/PC O-42:3/PC P-42:2	0.0212192	0.0137027	0.0178638	0.0175953	0.00376543	0.015486	0.0213363	0.0156794	0.0175006	0.00332321
PC 41:2/PC O-42:2/PC P-42:1	0.0117181	0.00822468	0.0096969	0.00987988	0.00175386	0.0103855	0.00907177	0.0077767	0.00907801	0.00130443
PC 42:8/PC 41:1/PC O-42:1/PC P-42:0	0.0308832	0.0284139	0.0220273	0.0271081	0.00457005	0.0545217	0.0301978	0.0242528	0.0363241	0.0160375
PC 42:7	0.024542	0.0234302	0.0217412	0.0232378	0.00141026	0.0422614	0.0252924	0.0205062	0.0293533	0.011432
PC 42:6	0.0152385	0.015012	0.0113374	0.0138626	0.00218988	0.0190698	0.0133752	0.00981659	0.0140872	0.00466753
PC 42:5	0.00837078	0.00867672	0.0062441	0.00776387	0.00132502	0.0101675	0.00829382	0.00596905	0.00814346	0.00210326

## Sheet: PE
PE - Intensity normalised to IS	Control_8wo_isolated hepatocytes					Cdk1 cKO_8wo_isolated hepatocytes
	Control 1	Control 2	Control 3	Average	Std. Dev.	KO 1	KO 2	KO 3	Average	Std. Dev.
PE 28:0 (IS)	1	1	1	1	0	1	1	1	1	0
PE 32:2	0.0120188	0.00621883	0.00895356	0.00906371	0.00290153	0.00602333	0.0100083	0.00878435	0.00827199	0.00204128
PE 32:1	0.102377	0.0455236	0.0692349	0.0723784	0.0285566	0.0377149	0.0515564	0.0449459	0.0447391	0.00692309
PE 32:0	0.0144878	0.00881148	0.00998056	0.0110933	0.00299729	0.007161	0.0119097	0.00977389	0.00961488	0.00237836
PE 33:2/PE O-34:2/PE P-34:1	0.0154045	0.011276	0.0133629	0.0133478	0.00206429	0.0149502	0.0135343	0.0101077	0.012864	0.00248986
PE 33:1/PE O-34:1/PE P-34:0	0.0236323	0.0142172	0.0143582	0.0174025	0.00539555	0.0143169	0.0173397	0.0147881	0.0154815	0.00162638
PE 34:3	0.299296	0.198444	0.260543	0.252761	0.0508745	0.180934	0.242949	0.189131	0.204338	0.0336885
PE 34:2	4.55105	4.16	4.0417	4.25092	0.266572	4.27111	4.34109	2.6676	3.75993	0.946633
PE 34:1	0.740562	0.364748	0.447222	0.51751	0.197521	0.426154	0.512496	0.377469	0.438706	0.0683833
PE 34:0	0.0077306	0.013735	0.0123418	0.0112691	0.00314264	0.0120198	0.0176001	0.0126334	0.0140844	0.00306007
PE 35:5/PE O-36:5/PE P-36:4	0.0233092	0.0180158	0.0161401	0.019155	0.00371788	0.0166697	0.0291	0.0142589	0.0200095	0.0079643
PE 35:4/PE O-36:4/PE P-36:3	0.0299174	0.0218724	0.0207793	0.0241897	0.00499036	0.0252395	0.0252945	0.0166589	0.0223976	0.00496997
PE 35:3/PE O-36:3/PE P-36:2	0.0345513	0.0205068	0.0273256	0.0274613	0.00702324	0.0283894	0.0258312	0.0185324	0.024251	0.00511497
PE 35:2/PE O-36:2/PE P-36:1	0.120324	0.0929699	0.0952319	0.102842	0.015182	0.135288	0.0992658	0.0681238	0.100892	0.0336114
PE 35:1/PE O-36:1/PE P-36:0	0.029209	0.0169435	0.0180669	0.0214065	0.00678047	0.0269352	0.0203135	0.0185678	0.0219388	0.00441413
PE 36:6	0.0235214	0.0146152	0.020727	0.0196212	0.00455494	0.012842	0.0195977	0.0155249	0.0159882	0.00340156
PE 36:5	0.618519	0.384935	0.573787	0.525747	0.123981	0.299276	0.446153	0.375288	0.373572	0.0734535
PE 36:4	10.4771	9.69532	10.0517	10.0747	0.39138	8.56439	9.52175	6.51411	8.20008	1.53656
PE 36:3	3.65386	2.15691	2.80623	2.87233	0.750659	2.9031	3.1807	2.13284	2.73888	0.54289
PE 36:2	3.9557	4.38607	3.85677	4.06618	0.281413	3.69785	4.01053	2.22995	3.31278	0.950696
PE 36:1	0.23395	0.158314	0.156263	0.182842	0.0442727	0.180433	0.173409	0.116009	0.156617	0.0353427
PE 36:0/PE 37:7/PE O-38:7/PE P-38:6	0.022818	0.0223265	0.0205783	0.0219076	0.00117711	0.0186469	0.0234647	0.0138241	0.0186452	0.00482033
PE 37:6/PE O-38:6/PE P-38:5	0.0700848	0.0612496	0.0504855	0.0606066	0.00981544	0.0703616	0.0664076	0.0448011	0.0605234	0.0137587
PE 37:5/PE O-38:5/PE P-38:4	0.095133	0.055673	0.0652704	0.0720255	0.020579	0.0663517	0.0783311	0.0546766	0.0664531	0.0118276
PE 37:4/PE O-38:4/PE P-38:3	0.359424	0.323862	0.271164	0.31815	0.0444062	0.451846	0.324286	0.230821	0.335651	0.11095
PE 37:3/PE O-38:3/PE P-38:2	0.0310156	0.0238991	0.0257772	0.0268973	0.0036881	0.0347587	0.0285869	0.020202	0.0278492	0.00730629
PE 37:2/PE O-38:2/PE P-38:1	0.041985	0.0311555	0.0380938	0.0370781	0.0054857	0.0638103	0.0425891	0.0279759	0.0447918	0.0180184
PE 37:1/PE O-38:1/PE P-38:0	0.0138776	0.00948606	0.0114611	0.0116083	0.00219947	0.0119444	0.0123926	0.00829604	0.0108777	0.00224697
PE 38:7/PE 37:0/PE O-38:0	0.451853	0.331865	0.410653	0.398124	0.0609673	0.267244	0.428103	0.352603	0.349317	0.08048
PE 38:6	19.5484	20.6263	19.8075	19.9941	0.562643	17.5039	21.2868	13.8783	17.5563	3.70451
PE 38:5	9.40496	6.45467	7.81624	7.89196	1.4766	7.4715	8.02706	6.17618	7.22491	0.949759
PE 38:4	17.4861	21.021	18.7905	19.0992	1.78751	15.9563	19.6558	12.6636	16.0919	3.49809
PE 38:3	0.720686	0.63595	0.640706	0.66578	0.0476088	0.615416	0.551199	0.307691	0.491435	0.162334
PE 38:2	0.114698	0.0928048	0.0970067	0.101503	0.0116185	0.122256	0.142408	0.093507	0.11939	0.024576
PE 38:1/PE 39:8/PE O-40:8/PE P-40:7	0.0344108	0.0284303	0.024609	0.02915	0.00494036	0.0337945	0.0356752	0.0209967	0.0301555	0.00798727
PE 38:0/PE 39:7/PE O-40:7/PE P-40:6	0.0606861	0.0433663	0.0462359	0.0500961	0.00928275	0.0473191	0.0533077	0.0434224	0.0480164	0.00497942
PE 39:6/PE O-40:6/PE P-40:5	0.228839	0.211038	0.192166	0.210681	0.0183395	0.244694	0.216168	0.151846	0.204236	0.0475601
PE 39:5/PE O-40:5/PE P-40:4	0.0716155	0.0536806	0.0560028	0.060433	0.00975373	0.0778291	0.0620787	0.0466912	0.0621997	0.0155693
PE 40:8	0.25934	0.19574	0.218075	0.224385	0.0322662	0.20016	0.272973	0.177942	0.217025	0.0497097
PE 40:7	5.19058	4.05288	4.77709	4.67351	0.57588	4.4078	6.23787	4.1304	4.92536	1.1451
PE 40:6	6.66272	8.83807	7.79342	7.76474	1.08796	6.56781	8.24393	4.49107	6.43427	1.87999
PE 40:5	0.739306	0.762648	0.605525	0.702493	0.0847841	0.609611	0.585202	0.38397	0.526261	0.12383
PE 40:4	0.157168	0.148541	0.141808	0.149172	0.00769944	0.188087	0.183023	0.115785	0.162298	0.0403613
PE 40:3	0.0132852	0.0076611	0.00644273	0.00912969	0.00365001	0.00983754	0.0105903	0.0068837	0.00910383	0.00195918
PE 40:2	0.0050338	0.00470323	0.0044778	0.00473828	0.00027965	0.00513692	0.00628294	0.00473784	0.0053859	0.000802076
PE 40:1/PE 41:8/PE-O 42:8/PE-P 42:7	0.0369577	0.0393104	0.0360302	0.0374328	0.00169095	0.0329445	0.0375764	0.0252163	0.0319124	0.00624436
PE 40:0/PE 41:7/PE O-42:7/PE P-42:6	0.0442702	0.0335328	0.0384454	0.0387494	0.00537516	0.0445931	0.0392595	0.02746	0.0371042	0.00876754
PE 41:6/PE O-42:6/PE P-42:5	0.0771566	0.07698	0.0795453	0.0778939	0.00143282	0.107491	0.0865627	0.0545215	0.0828585	0.0266785
PE 41:5/PE 42:12/PE O-42:5/PE P-42:4	0.012236	0.0104029	0.0111107	0.0112499	0.000924416	0.0133703	0.0131826	0.00870304	0.011752	0.00264215
PE 41:4/PE 42:11/PE O-42:4/PE P-42:3	0.0210872	0.0185259	0.0181547	0.0192559	0.00159676	0.0267951	0.0201035	0.015958	0.0209522	0.00546816
PE 41:3/PE 42:10/PE O-42:3/PE P-42:2	0.0444513	0.0302862	0.042652	0.0391298	0.00771145	0.0333473	0.0483518	0.0250139	0.035571	0.0118268
PE 41:2/PE 42:9/PE O-42:2/PE P-42:1	0.0268606	0.023063	0.0235712	0.0244982	0.00206154	0.0214088	0.0251857	0.0164791	0.0210246	0.004366
PE 41:1/PE 42:8/PE O-42:1/PE P-42:0	0.0878577	0.0795818	0.0759209	0.0811202	0.00611526	0.129344	0.107838	0.0659276	0.101036	0.0322505
PE 41:0/PE 42:7	0.108592	0.0924705	0.0995603	0.100208	0.0080802	0.162458	0.142648	0.0826161	0.129241	0.0415751
PE 42:6	0.0357014	0.0279926	0.0314993	0.0317311	0.00385962	0.0477395	0.0396671	0.022383	0.0365965	0.0129542
PE 42:5	0.0152537	0.0169114	0.0133134	0.0151595	0.00180082	0.0206983	0.0194821	0.0118195	0.0173333	0.00481369
PE 42:4	0.00668966	0.00666051	0.00517332	0.0061745	0.000867168	0.00948423	0.00915547	0.00567747	0.00810572	0.00210934
PE 44:12	0.00907954	0.00548587	0.0103686	0.00831133	0.00253037	0.00590215	0.0138353	0.00557338	0.00843694	0.004678

## Sheet: PS
PS - Intensity normalised to IS	Control_8wo_isolated hepatocytes					Cdk1 cKO_8wo_isolated hepatocytes
	Control 1	Control 2	Control 3	Average	Std. Dev.	KO 1	KO 2	KO 3	Average	Std. Dev.
PS 28:0 (IS)	1	1	1	1	0	1	1	1	1	0
PS 36:4	0.593771	0.545146	0.539049	0.559322	0.0299888	0.699368	0.648935	0.485118	0.61114	0.112014
PS 36:3	0.0446802	0.0290593	0.0241279	0.0326225	0.0107295	0.0390445	0.0388454	0.0282563	0.035382	0.00617191
PS 36:2	0.347156	0.262779	0.213606	0.274514	0.0675437	0.315157	0.360989	0.227137	0.301094	0.068025
PS 36:1	0.171697	0.103258	0.104774	0.126576	0.0390827	0.118739	0.220378	0.0998495	0.146322	0.0648262
PS 36:0	0.00376289	0.00491465	0.00334595	0.00400783	0.000812529	0.00431477	0.00298153	0.00357415	0.00362348	0.000667987
PS 38:6	0.772143	0.98926	0.780791	0.847398	0.122932	1.05464	1.19425	0.722013	0.990302	0.242606
PS 38:5	0.367538	0.275667	0.272184	0.30513	0.0540754	0.356854	0.327458	0.232983	0.305765	0.0647225
PS 38:4	4.81683	5.9629	4.7793	5.18634	0.672779	6.35199	6.35241	4.18058	5.62833	1.25379
PS 38:3	0.288084	0.196355	0.197656	0.227365	0.0525884	0.213659	0.246883	0.161209	0.207251	0.0431951
PS 38:2	0.0325459	0.0274275	0.0217931	0.0272555	0.00537848	0.0303657	0.0444928	0.0243779	0.0330788	0.0103282
PS 40:9	0.0086938	0.00946752	0.00829518	0.00881884	0.000596087	0.0112551	0.0115039	0.0078224	0.0101938	0.00205746
PS 40:8	0.013988	0.00924325	0.010641	0.0112907	0.00243819	0.0126674	0.0144573	0.00921666	0.0121138	0.00266381
PS 40:7	0.184975	0.162094	0.142849	0.163306	0.0210891	0.208621	0.206214	0.149599	0.188145	0.0334028
PS 40:6	3.1054	4.64428	3.13715	3.62894	0.879453	4.29198	4.71654	2.94345	3.98399	0.925802
PS 40:5	0.271303	0.267193	0.200025	0.246174	0.0400188	0.347698	0.333623	0.179841	0.287054	0.0931153
PS 40:4	0.204804	0.165838	0.128686	0.166443	0.0380628	0.196769	0.272076	0.151522	0.206789	0.0608987
PS 40:3	0.00985991	0.00816082	0.00844638	0.00882237	0.000909809	0.0110063	0.0139147	0.00764548	0.0108555	0.00313735
PS 40:2	0.0113953	0.00820902	0.00806338	0.00922258	0.00188307	0.00867264	0.0135476	0.00693746	0.00971924	0.00342711
PS 42:8	0.0111211	0.0115641	0.00899574	0.0105603	0.00137294	0.0157888	0.014172	0.0091092	0.0130233	0.0034848
PS 42:7	0.0136022	0.010885	0.00960184	0.011363	0.00204255	0.0291926	0.0194211	0.0138426	0.0208188	0.00776989
PS 42:6	0.0118692	0.010411	0.0100809	0.010787	0.000951594	0.0219154	0.0167694	0.00977417	0.016153	0.00609406
PS 42:4	0.00810829	0.00695867	0.00563568	0.00690088	0.00123732	0.00735541	0.0111637	0.00573481	0.00808464	0.00278694
