# Supplementary material for: Remodeling of whole-body lipid metabolism and a diabetic-like phenotype caused by loss of CDK1 and hepatocyte division
Source: eLife. 2020 Dec 21;9:e63835. doi: 10.7554/eLife.63835 (PMC7771968; doi:10.7554/eLife.63835)
Supplement: Supplementary file 3. [file elife-63835-supp3.xlsx]

## Sheet: Result
Normalised to IS
AnalysisID	Control_8wo							Cdk1 cKO_8wo
	Control 1	Control 2	Control 3	Control 4	Control 5	Average	Std. Dev.	KO 1	KO 2	KO 3	KO 4	KO 5	Average	Std. Dev.
C 12:0	0.0032082	0.0033542	0.00317821	0.00515162	0.00271505	0.00352146	0.000942291	0.00520593	0.00504051	0.00408916	0.00364886	0.0034896	0.00429481	0.000789639
C 14:0	0.0280377	0.0360476	0.026126	0.0411793	0.0231586	0.0309099	0.00746784	0.0510686	0.0625405	0.0400156	0.0410053	0.0393189	0.0467898	0.0100194
C 14:1_1	0.00229291	0.00259676	0.00207968	0.00350182	0.00142023	0.00237828	0.000762298	0.00565288	0.00584231	0.00371268	0.00411145	0.0042003	0.00470392	0.000972581
C 14:1_2	0.00410412	0.0038464	0.00314462	0.00707711	0.00336784	0.00430802	0.00159373	0.00304995	0.00280142	0.00171074	0.00277285	0.00205735	0.00247846	0.000566636
C 15:0	0.00994278	0.0108215	0.00598294	0.0121731	0.00755377	0.00929482	0.00250175	0.0168112	0.0223186	0.0133899	0.0121821	0.0108947	0.0151193	0.00458688
C 15:1	0.00115419	0.00128296	0.000309354	0.0020176	0.00115798	0.00118442	0.000606475	0.00297931	0.00185499	0.00204553	0.00119477	0.00207786	0.00203049	0.000638742
C 16:0	1.92843	1.73984	1.39428	1.78257	1.20067	1.60916	0.300878	2.71515	3.04221	1.78568	1.99205	2.07125	2.32127	0.532128
C 16:1	0.258872	0.271517	0.235299	0.303851	0.183419	0.250592	0.0449697	0.604688	0.66819	0.36438	0.48265	0.439293	0.51184	0.123415
C 17:0	0.0250993	0.0208459	0.0142405	0.0197515	0.0120986	0.0184072	0.00523686	0.0328663	0.042804	0.0225186	0.0236946	0.0237869	0.0291341	0.00869973
C 17:1	0.0302498	0.0284579	0.0207161	0.025224	0.0206947	0.0250685	0.00437127	0.0586653	0.076343	0.0372871	0.0413151	0.0372576	0.0501736	0.0170902
C 17:1_1	0.0243352	0.0213242	0.0175187	0.0189244	0.01439	0.0192985	0.0037707	0.04901	0.0715106	0.0305416	0.0391943	0.0317852	0.0444083	0.0168414
C 17:1_2	0.00591464	0.00713366	0.00319737	0.00629963	0.00630467	0.00576999	0.00150543	0.00965529	0.00483237	0.00674543	0.00212082	0.00547245	0.00576527	0.00275368
C 18:0	1.13748	1.08932	0.847386	1.05984	0.764628	0.979731	0.163628	1.15956	1.19017	0.953067	0.93098	1.02169	1.05109	0.118331
C 18:1	2.63825	2.32555	1.61693	2.3056	1.49294	2.07585	0.495433	4.40706	6.20481	2.97508	4.09934	3.72407	4.28207	1.20058
C 18:2	4.63395	3.83148	1.9025	3.80442	2.17046	3.26856	1.17689	5.43898	7.20642	3.47986	5.20175	4.84941	5.23528	1.33776
C 18:3	0.436732	0.387737	0.201444	0.420313	0.231931	0.335631	0.11053	0.56054	0.665548	0.351875	0.471489	0.501285	0.510147	0.115447
C 18:3_1	0.345684	0.337505	0.153868	0.337665	0.182671	0.271478	0.0948228	0.481259	0.520387	0.269567	0.352969	0.431451	0.411126	0.10086
C 18:3_2	0.0910483	0.0502324	0.0475754	0.0826483	0.04926	0.0641529	0.0209513	0.0792811	0.145162	0.0823079	0.11852	0.0698336	0.0990209	0.0317415
C 18:4	0.0145987	0.00599712	0.00771211	0.0138765	0.00795205	0.0100273	0.00392502	0.0136231	0.022584	0.014044	0.0170454	0.0092735	0.015314	0.00491962
C 19:0	0.0125533	0.00955077	0.00758501	0.0105164	0.00582901	0.0092069	0.00260154	0.0177521	0.0205433	0.0106304	0.0108091	0.0122894	0.0144049	0.00448708
C 20:0	0.085125	0.0937226	0.0631594	0.0947444	0.0757406	0.0824984	0.0132525	0.117936	0.0996847	0.0905623	0.0844013	0.0913928	0.0967955	0.013009
C 20:1	0.147593	0.181627	0.0652955	0.157561	0.0733291	0.125081	0.0524685	0.211357	0.286355	0.152832	0.153817	0.168759	0.194624	0.0565139
C 20:2	0.0712366	0.0619666	0.0477913	0.0560173	0.0411235	0.0556271	0.0117872	0.0614508	0.123535	0.052307	0.0755405	0.0494297	0.0724526	0.0303146
C 20:3	0.134299	0.123838	0.0990967	0.128519	0.0920453	0.11556	0.0187855	0.166115	0.328689	0.140042	0.197603	0.137733	0.194037	0.0790713
C 20:3_1	0.1187	0.109548	0.0856579	0.11586	0.0816374	0.102281	0.0173872	0.121793	0.266146	0.10831	0.158211	0.102072	0.151306	0.0677856
C 20:3_2	0.015599	0.0142898	0.0134388	0.0126591	0.0104079	0.0132789	0.00194017	0.044322	0.0625434	0.0317321	0.0393925	0.0356617	0.0427304	0.0120121
C 20:4	0.786509	0.695852	0.567416	0.645128	0.498802	0.638741	0.111589	0.672452	1.44724	0.614887	0.829149	0.63097	0.838939	0.350461
C 20:5	0.119638	0.0726427	0.0690849	0.0822184	0.0694913	0.0826151	0.0213637	0.079598	0.148511	0.0659964	0.0890261	0.0641451	0.0894554	0.0345539
C 22:1	0.0397356	0.0653332	0.0218903	0.0379434	0.0321681	0.0394141	0.0160752	0.0618998	0.0653088	0.0363783	0.0403929	0.0425741	0.0493108	0.0132908
C 22:4	0.0795969	0.0728991	0.0685454	0.079345	0.0645804	0.0729934	0.00660534	0.0614604	0.156031	0.0542846	0.0848353	0.0505844	0.0814391	0.0437721
C 22:5	0.143922	0.112344	0.101524	0.122478	0.095991	0.115252	0.0189876	0.120365	0.279821	0.119298	0.165453	0.103434	0.157674	0.0720886
C 22:5_1	0.0963637	0.0703745	0.0619464	0.0818262	0.0608983	0.0742818	0.0149254	0.0634367	0.12126	0.0649761	0.0802823	0.0515825	0.0763075	0.0271196
C 22:5_2	0.0475587	0.0419693	0.0395774	0.0406514	0.0350927	0.0409699	0.00449983	0.0569279	0.158561	0.0543223	0.085171	0.0518515	0.0813668	0.0452031
C 22:6	0.653272	0.435289	0.374837	0.464586	0.360317	0.45766	0.117418	0.325079	0.936676	0.31062	0.577748	0.277311	0.485487	0.279164
C 24:1	0.030417	0.027546	0.0262971	0.0372909	0.0284367	0.0299975	0.00434479	0.0417681	0.0413632	0.0276513	0.0284181	0.0274125	0.0333226	0.00753531
C 24:4	0.00771815	0.00633802	0.0088823	0.00893244	0.00759111	0.0078924	0.00107224	0.00316302	0.00803049	0.00360221	0.00545287	0.00281497	0.00461272	0.00216458
C 22:5	0.0213033	0.0143952	0.0186365	0.0189524	0.0175471	0.0181669	0.00251417	0.0140091	0.0336392	0.0147818	0.0223662	0.0118817	0.0193356	0.00892256
C 24:5_1	0.0165339	0.00941753	0.0120293	0.0141822	0.012163	0.0128652	0.00265856	0.00448184	0.0136896	0.00619991	0.00897063	0.00389377	0.00744715	0.00400824
C 24:5_2	0.00476944	0.00497771	0.00660715	0.00477023	0.00538407	0.00530172	0.000771641	0.00952725	0.0199497	0.00858191	0.0133956	0.00798795	0.0118885	0.00497436
C 24:6	0.0218587	0.0160204	0.0185316	0.0149133	0.0173939	0.0177436	0.00267664	0.0287872	0.0637738	0.029449	0.0434638	0.0243993	0.0379746	0.0161021
Total	13.5072	11.7481	7.8399	11.7657	7.60456	10.4931	2.62974	17.0591	23.2587	11.7721	15.7337	14.4345	16.4516	4.27748
