# Supplementary material for: Remodeling of whole-body lipid metabolism and a diabetic-like phenotype caused by loss of CDK1 and hepatocyte division
Source: eLife. 2020 Dec 21;9:e63835. doi: 10.7554/eLife.63835 (PMC7771968; doi:10.7554/eLife.63835)
Supplement: Supplementary file 4. [file elife-63835-supp4.xlsx]

## Sheet: Sheet1
	Findings	Control 1	Control 2	Control 3	Control 4	Control 5	KO 1	KO 2	KO 3	KO 4	KO 5
	Diffuse hepatocellular swelling (glycogen)	4	5	2	4	3	4	0	3	4	3
	Hepatocellular (microvesicular) fatty change	0	0	0	0	0	2	0	0	4	0
	Hepatocellular (macrovesicular) fatty change	0	0	0	0	0	3	0	1	4	1
	Multifocal extramedullary hematopoiesis (EMH)	0	0	0	0	0	0	0	1	0	0
	Multifocal polymorphonuclear, mononuclear inflammation	0	0	1	1	0	1	0	0	1	0
	Portal polymorphonuclear, mononuclear inflammation	0	0	0	0	0	1	0	0	0	0
	Individual hepatocyte necrosis/apoptosis	0	0	0	0	0	0	0	0	1	0
	Oval cell hyperplasia	0	0	0	0	0	0	0	0	2	0
	Fibrosis score	0	0	0	0	0	3	0	1	3	0
