# Supplementary material for: Remodeling of whole-body lipid metabolism and a diabetic-like phenotype caused by loss of CDK1 and hepatocyte division
Source: eLife. 2020 Dec 21;9:e63835. doi: 10.7554/eLife.63835 (PMC7771968; doi:10.7554/eLife.63835)
Supplement: Supplementary file 5. [file elife-63835-supp5.xlsx]

## Sheet: TG
TG - Intensity normalised to IS	Control_12mo							Cdk1 cKO__12mo
	Control 1	Control 2	Control 3	Control 4	Control 5	Average	Std. Dev.	KO 1	KO 2	KO 3	KO 4	KO 5	Average	Std. Dev.
TG 48:0 - 16:0 - d5	1	1	1	1	1	1	0	1	1	1	1	1	1	0
TG 48:0 - 16:0	0.241417	0.253334	0.162145	0.255993	0.15422	0.213422	0.0508014	0.586174	0.436658	1.35236	1.41045	0.444863	0.846099	0.492691
TG 48:1 - 14:0	0.0505374	0.0397727	0.0578217	0.0539333	0.0698277	0.0543785	0.0109409	0.247985	0.107297	0.271144	0.463158	0.129445	0.243806	0.141945
TG 48:1 - 16:0	0.306342	0.203715	0.320714	0.39655	0.418698	0.329204	0.0849807	1.01718	0.77925	1.15509	2.88076	0.425435	1.25154	0.951851
TG 48:2 - 14:0	0.0658791	0.0339161	0.0399276	0.0645329	0.0792928	0.0567097	0.0190818	0.332039	0.131321	0.274553	0.481519	0.115452	0.266977	0.151394
TG 48:2 - 16:0	0.185085	0.133348	0.107882	0.145069	0.193723	0.153021	0.0359601	0.621552	0.322917	0.519404	1.30619	0.348624	0.623737	0.400877
TG 48:3 - 14:0	0.0127984	0.00402098	0.00646775	0.00623506	0.0187963	0.00966371	0.00606303	0.0802306	0.0109434	0.0505768	0.0816794	0.0173307	0.0481522	0.0335165
TG 48:3 - 16:0	0.00902453	0.00673077	0.00888237	0.012574	0.013528	0.0101479	0.00282186	0.0501147	0.0321891	0.0362864	0.0701487	0.0472849	0.0472047	0.0148288
TG 50:1 - 16:0	1.96956	1.40105	1.7196	1.75522	2.80739	1.93057	0.530563	6.07023	3.82905	4.4247	13.9032	4.29663	6.50476	4.22159
TG 50:1 - 18:0	0.0507015	0.0316434	0.0276388	0.0173023	0.0304938	0.0315559	0.0121057	0.102817	0.0663446	0.129734	0.192768	0.056913	0.109716	0.054807
TG 50:2 - 14:0	0.0643203	0.0268357	0.0402725	0.0420347	0.0756318	0.049819	0.0197266	0.389977	0.124695	0.13814	0.512656	0.131028	0.259299	0.180636
TG 50:2 - 16:0	3.45377	1.60927	2.34922	2.36828	4.50388	2.85688	1.13158	13.9726	4.63481	5.66418	18.0052	6.5319	9.76175	5.89903
TG 50:3 - 14:0	0.0396259	0.0206294	0.0291911	0.0148083	0.15171	0.0511929	0.0569639	0.568967	0.0594622	0.124784	0.45673	0.130087	0.268006	0.228702
TG 50:3 - 16:0	0.568053	0.359353	0.660055	0.886158	1.22109	0.738942	0.329262	3.77695	1.88539	1.13347	4.18887	2.70735	2.73841	1.27346
TG 50:4 - 14:0	0.00598901	0.00493881	0.00970162	0.00270186	0.0505402	0.0147743	0.0201531	0.17846	0.0079511	0.0654275	0.0791081	0.0451453	0.0752184	0.0636379
TG 50:4 - 16:0	0.03979	0.0292395	0.020783	0.0410994	0.0912581	0.044434	0.0274565	0.319158	0.0910956	0.0870032	0.230976	0.141256	0.173898	0.0997882
TG 52:0 - 16:0	0.183936	0.0958042	0.107925	0.101112	0.099741	0.117704	0.0372824	0.151403	0.104647	0.114603	0.115508	0.100518	0.117336	0.020095
TG 52:0 - 18:0	0.289852	0.14882	0.159667	0.138262	0.132021	0.173724	0.0657649	0.209282	0.151456	0.207911	0.136963	0.130429	0.167208	0.038544
TG 52:1 - 16:0	0.369513	0.220105	0.214169	0.238751	0.284043	0.265316	0.0643693	0.797777	0.499209	0.714006	1.56802	0.450426	0.805887	0.449933
TG 52:1 - 18:0	0.368283	0.215778	0.263367	0.218331	0.276632	0.268478	0.0619387	0.744897	0.543539	0.64713	1.36476	0.477727	0.755612	0.355368
TG 52:2 - 16:0	6.02371	2.14554	3.14936	4.63857	5.4562	4.28268	1.61143	20.4176	9.58693	6.05595	29.6962	8.86983	14.9253	9.90174
TG 52:2 - 18:0	0.223316	0.17028	0.174112	0.151148	0.34762	0.213295	0.0796737	1.08817	0.313299	0.682903	1.1857	0.442766	0.742567	0.385201
TG 52:3 - 16:0	6.11117	3.35699	4.02453	3.42419	9.00174	5.18373	2.40905	32.5584	12.667	7.95475	20.2871	18.6183	18.4171	9.30105
TG 52:3 - 18:0	0.017885	0.0168269	0.030614	0.0270186	0.0613448	0.0307379	0.0180924	0.214046	0.0484333	0.0938215	0.180675	0.0821173	0.123819	0.0701702
TG 52:4 - 16:0	1.61465	0.984266	1.46382	0.691832	4.43508	1.83793	1.49811	14.0291	3.05668	3.81591	4.22881	6.60302	6.34669	4.49441
TG 52:5 - 16:0	0.174666	0.106556	0.148801	0.0535696	0.493883	0.195495	0.17299	1.57255	0.315009	0.3029	0.535717	0.776328	0.700502	0.524421
TG 52:6 - 16:0	0.00459431	0.00725524	0.0166868	0.00488413	0.0382623	0.0143366	0.0142511	0.087289	0.0154747	0.0207818	0.0319405	0.0398819	0.0390736	0.0285821
TG 53:3 - 16:0	0.0514398	0.0476836	0.0388496	0.0395926	0.143763	0.0642657	0.0447605	0.601788	0.12803	0.116285	0.161069	0.21015	0.243464	0.203589
TG 53:3 - 17:0	0.0309295	0.0193182	0.00931356	0.0109633	0.051701	0.0244451	0.0174781	0.164873	0.0583935	0.0513707	0.071354	0.055886	0.0803754	0.0478157
TG 53:4 - 17:0	0.00492247	0.000174825	0.000129355	0	0.0328601	0.00761735	0.0142648	0.0788777	0.0019664	0.0080325	0.0180796	0.0368009	0.0287514	0.030976
TG 54:1 - 16:0	0.10731	0.0593531	0.0725681	0.0406838	0.0937137	0.0747257	0.0265617	0.260514	0.101654	0.0664083	0.324508	0.155719	0.181761	0.108375
TG 54:1 - 18:0	0.112561	0.0475087	0.0393239	0.0667671	0.0513885	0.0635098	0.029174	0.0983472	0.064492	0.111194	0.100643	0.0767256	0.0902803	0.0190959
TG 54:1 - 20:0	0.148987	0.0692745	0.0765781	0.0918632	0.103402	0.0980209	0.0314267	0.347568	0.120292	0.0787372	0.364885	0.19252	0.220801	0.130302
TG 54:2 - 16:0	0.391993	0.176399	0.204769	0.277564	0.463256	0.302796	0.122399	1.3658	0.605395	0.272638	2.13628	0.652873	1.0066	0.746658
TG 54:2 - 18:0	0.184839	0.0967657	0.159236	0.106931	0.230378	0.15563	0.05543	0.684372	0.217116	0.409564	0.876738	0.239548	0.485468	0.287622
TG 54:2 - 20:0	0.0804004	0.0887675	0.0639876	0.0459836	0.144522	0.0847322	0.0372211	0.332392	0.118711	0.0823332	0.335998	0.194274	0.212742	0.118002
TG 54:3 - 16:0	0.37862	0.149607	0.239005	0.256209	0.412046	0.287097	0.107423	1.72772	0.591245	0.1932	1.0828	0.950576	0.909109	0.573493
TG 54:3 - 18:0	0.142998	0.0866696	0.14367	0.0831342	0.349674	0.161229	0.109328	1.50144	0.263284	0.478821	0.567497	0.445077	0.651224	0.488005
TG 54:4 - 16:0	0.197719	0.077535	0.152466	0.0733659	0.231003	0.146418	0.0705416	0.698135	0.281452	0.119554	0.762957	0.432453	0.45891	0.272501
TG 54:4 - 18:0	0.0272377	0.021722	0.0294067	0.0190169	0.120591	0.0435949	0.0432429	0.394624	0.0568119	0.140289	0.160948	0.16278	0.18309	0.125924
TG 54:5 - 16:0	0.185905	0.0391171	0.0840807	0.0559077	0.296768	0.132356	0.108128	0.566908	0.25016	0.135058	0.591483	0.364286	0.381579	0.197958
TG 54:5 - 18:0	0.00147674	4.37063e-06	0.00219903	0.00207835	0.014287	0.0040091	0.00581141	0.0489383	0.00615569	0.0149442	0.0175974	0.0134366	0.0202144	0.0166078
TG 56:2 - 16:0	0.0913939	0.041958	0.0435926	0.0578822	0.0714349	0.0612523	0.0206621	0.178754	0.0810499	0.0375006	0.213901	0.083829	0.119007	0.0739868
TG 56:2 - 20:0	0.0455329	0.0191434	0.0262159	0.0209914	0.0605411	0.0344849	0.017936	0.176343	0.0460394	0.0349788	0.120852	0.0784372	0.0913299	0.0580767
TG 56:3 - 16:0	0.0451227	0.0112762	0.0327699	0.0308116	0.0715242	0.0383009	0.0221774	0.151873	0.0575813	0.0392752	0.08409	0.0894347	0.0844509	0.0428182
TG 56:3 - 18:0	0.0242842	0.00817308	0.00797689	0.00613114	0.0225913	0.0138313	0.00882585	0.0710546	0.0206472	0.0255919	0.0406187	0.0253327	0.036649	0.0206512
TG 56:3 - 20:0	0.0347855	0.0232955	0.0310021	0.032786	0.0784445	0.0400627	0.0218929	0.322687	0.0329158	0.0393219	0.112897	0.084043	0.118373	0.118854
TG 56:4 - 16:0	0.0246124	0.00590035	0.0087099	0.00940455	0.0260291	0.0149313	0.00958766	0.0542321	0.0182533	0.0081259	0.0364805	0.0260174	0.0286218	0.0176919
TG 56:4 - 18:0	0.00886045	0.0041521	0.00633839	0.00150681	0.0165193	0.00747542	0.00573743	0.0681136	0.012235	0.0118153	0.0360386	0.00958535	0.0275576	0.0251114
TG 56:5 - 16:0	0.0402822	0.0167395	0.0144446	0.0295126	0.045763	0.0293484	0.0138755	0.0838774	0.0408242	0.0362864	0.172238	0.0810903	0.0828632	0.0546092
TG 56:6 - 16:0	0.0910657	0.0312937	0.0451449	0.0325262	0.0963032	0.0592668	0.0319368	0.254809	0.0802804	0.0920002	0.278666	0.185374	0.178226	0.0908741
TG 56:7 - 16:0	0.0772828	0.0212413	0.0308296	0.021407	0.102241	0.0506004	0.0370264	0.391624	0.0595905	0.0819596	0.191563	0.195729	0.184093	0.131522
TG 56:8 - 16:0	0.0369185	0.0145542	0.0214298	0.0136652	0.106617	0.0386369	0.0391275	0.277631	0.0481768	0.0380143	0.0734833	0.146904	0.116842	0.0994553
TG 48:1 - 16:1	0.180983	0.0987325	0.0959383	0.138055	0.111349	0.125012	0.0354451	0.254279	0.213055	0.312053	0.951788	0.141213	0.374478	0.328672
TG 48:1 - 18:1	0.0979572	0.0689685	0.053941	0.0869272	0.110724	0.0837036	0.0226197	0.241398	0.186509	0.299257	0.517798	0.17857	0.284706	0.139039
TG 48:2 - 16:1	0.215522	0.134309	0.160357	0.172296	0.209528	0.178402	0.0341093	0.501853	0.491557	0.416196	1.5585	0.315289	0.656679	0.50963
TG 48:2 - 18:1	0.0580852	0.0309878	0.0261728	0.0192248	0.054871	0.0378683	0.0175323	0.140051	0.0579661	0.0835941	0.346284	0.0566135	0.136902	0.121829
TG 48:3 - 14:1	0.00771187	0.00524476	0.00909796	0.00810558	0.0106259	0.00815722	0.00197883	0.0429387	0.0138503	0.0221361	0.0387706	0.0159613	0.0267314	0.013329
TG 48:3 - 16:1	0.0126343	0.0114073	0.00944291	0.018913	0.0458523	0.01965	0.0150702	0.129404	0.0166289	0.089852	0.226637	0.0451453	0.101533	0.0820862
TG 50:1 - 18:1	1.47453	0.461014	0.7547	0.81856	1.25984	0.953729	0.407918	3.72002	1.57829	2.32569	6.89156	2.64757	3.43263	2.08129
TG 50:2 - 16:1	1.11601	0.684615	0.678036	1.1538	1.27449	0.981389	0.280113	4.29963	2.15458	1.18269	10.0984	2.19911	3.98688	3.60088
TG 50:2 - 18:1	1.25646	0.727142	0.811659	1.52962	1.69194	1.20336	0.426668	5.37292	2.3351	1.68556	8.85155	2.40781	4.13059	3.00003
TG 50:3 - 16:1	0.640496	0.587981	0.646214	0.932713	1.34235	0.829951	0.316748	3.45374	1.83294	1.41802	4.80378	1.92054	2.6858	1.41384
TG 50:3 - 18:1	0.105751	0.0369318	0.0364781	0.058038	0.216939	0.0908276	0.0759285	1.12617	0.113453	0.30743	1.21249	0.257906	0.603491	0.522326
TG 50:4 - 14:1	0.00319961	4.37063e-06	0.00189721	0.00166268	0.00223234	0.00179924	0.00116172	0.00752897	0.00247937	0.00877971	0.0108477	0.00397963	0.00672308	0.00344338
TG 50:4 - 16:1	0.0575929	0.0317308	0.0359176	0.0413073	0.165417	0.066393	0.0562197	0.52444	0.0755354	0.177649	0.488188	0.100732	0.273309	0.216384
TG 50:4 - 18:1	0.00623513	0.00104895	0.00500172	0.00296165	0.0112957	0.00530862	0.00388749	0.0599377	0.00427478	0.0194275	0.0479309	0.0114682	0.0286078	0.0241096
TG 52:1 - 18:1	0.346214	0.146416	0.159796	0.139198	0.216403	0.201605	0.0863411	0.680489	0.386355	0.473217	0.885577	0.344046	0.553937	0.226194
TG 52:1 - 20:1	0.0215768	0.0203234	0.0239738	0.0244726	0.0412537	0.0263201	0.0085204	0.0851715	0.0520669	0.04133	0.180916	0.0609354	0.084084	0.0564944
TG 52:2 - 16:1	0.0609566	0.0255682	0.0363919	0.0417749	0.0970176	0.0523418	0.0280759	0.235516	0.0982773	0.106991	0.42037	0.0808336	0.188397	0.143483
TG 52:2 - 18:1	10.1196	3.22622	5.86659	5.9323	10.9937	7.22768	3.24377	55.6896	21.5345	8.85541	64.0137	21.7664	34.3719	24.0201
TG 52:3 - 16:1	0.113791	0.0777972	0.0686875	0.110257	0.481606	0.170428	0.175065	1.97277	0.282734	0.390043	3.4781	0.371133	1.29896	1.40734
TG 52:3 - 18:1	7.70129	3.18947	3.6601	3.27746	10.3834	5.64234	3.2502	38.1225	10.8405	6.64232	30.8371	17.4899	20.7865	13.336
TG 52:4 - 16:1	0.0488965	0.0439248	0.054286	0.130521	0.620055	0.179537	0.248799	2.04811	0.127645	0.482464	1.9591	0.291155	0.981696	0.941813
TG 52:4 - 18:1	0.309952	0.184309	0.240471	0.186844	1.22506	0.429328	0.447758	3.64767	0.727696	0.700322	2.83166	1.07155	1.79578	1.35719
TG 52:5 - 16:1	0.0173927	0.0143357	0.0194464	0.0370467	0.286365	0.0749173	0.118533	0.79113	0.0368486	0.115864	0.334793	0.1214	0.280007	0.306379
TG 52:5 - 18:1	0.00492247	0.0115822	0.0133236	0.00581939	0.0831771	0.0237649	0.0334078	0.195694	0.0210747	0.0276935	0.141462	0.0547306	0.0881311	0.0769398
TG 52:6 - 16:1	0.00500451	0.00231643	0.0025871	0.00415671	0.0169212	0.00619718	0.00609677	0.0734074	0.0038473	0.0079391	0.0295299	0.0106123	0.0250672	0.0287632
TG 53:2 - 18:1	0.0267454	0.0173951	0.0259141	0.012626	0.0286186	0.0222599	0.006899	0.13258	0.0485615	0.0305422	0.0704701	0.0587958	0.06819	0.0388658
TG 53:3 - 18:1	0.045861	0.017701	0.0307434	0.0191728	0.0930887	0.0413134	0.0310678	0.310982	0.0639935	0.0598702	0.259863	0.10561	0.160064	0.117228
TG 53:4 - 17:1	0.00360981	0.000786713	0.00275957	0.00296165	0.0462988	0.0112833	0.0196026	0.115758	0.0111999	0.0200813	0.0508236	0.0265737	0.0448873	0.0422595
TG 53:4 - 18:1	0.00246124	0.00616259	0.00340635	0.00592331	0.0342888	0.0104485	0.0134219	0.116405	0.00901979	0.0312427	0.0807955	0.017673	0.0510272	0.0459047
TG 54:1 - 18:1	0.107064	0.0753497	0.0650224	0.0544529	0.0782659	0.0760309	0.0197186	0.216811	0.0960544	0.0782235	0.232423	0.119175	0.148537	0.0711664
TG 54:2 - 18:1	0.660514	0.257343	0.356157	0.387613	0.565676	0.44546	0.163867	1.99106	0.780233	0.820903	2.80743	0.871496	1.45423	0.91026
TG 54:2 - 20:1	0.505784	0.161101	0.2807	0.339083	0.402982	0.33793	0.129375	1.39492	0.709614	0.326764	2.28224	0.573024	1.05731	0.791132
TG 54:3 - 16:1	0.0110756	0.0034528	0.00845119	0.0157955	0.0323243	0.0142199	0.0110606	0.168461	0.0163724	0.0223696	0.244476	0.0238778	0.0951112	0.105185
TG 54:3 - 18:1	0.660103	0.39799	0.413418	0.544425	2.31668	0.866523	0.81764	8.04747	1.36913	2.71601	12.4332	1.26886	5.16694	4.91736
TG 54:3 - 20:1	0.27049	0.0859266	0.159495	0.22706	0.469685	0.242531	0.144948	1.47715	0.406874	0.263672	1.5599	0.802131	0.901946	0.597122
TG 54:4 - 18:1	0.532119	0.299956	0.346714	0.4602	2.32731	0.793259	0.862434	8.94036	0.796221	2.06501	7.17951	1.3081	4.05784	3.73344
TG 54:4 - 20:1	0.00467635	0.00288462	0.0030614	0.0090928	0.0568354	0.0153101	0.023348	0.146403	0.0164152	0.0163452	0.106308	0.0417219	0.0654386	0.0583127
TG 54:5 - 16:1	0.00205103	0.00244755	0.00349258	0.000259794	0.0359854	0.00884726	0.0152154	0.0621728	0.00760911	0.0138234	0.0728003	0.00624759	0.0325306	0.0322574
TG 54:5 - 18:1	0.137665	0.0903409	0.0844257	0.093422	0.749353	0.231041	0.290516	3.11099	0.252511	0.553496	1.22125	0.456331	1.11892	1.17135
TG 54:6 - 18:1	0.00746575	0.00944056	0.0114695	0.00633898	0.120502	0.0310433	0.0500471	0.425269	0.0231266	0.0646336	0.116995	0.0562283	0.13725	0.164489
TG 56:2 - 18:1	0.129215	0.0586538	0.0647206	0.079601	0.125592	0.0915564	0.0336237	0.406505	0.120378	0.0818195	0.321012	0.152595	0.216462	0.140078
TG 56:2 - 22:1	0.0897531	0.0376311	0.0434633	0.0726385	0.0790696	0.0645111	0.0228074	0.215576	0.102552	0.056928	0.242748	0.121571	0.147875	0.0784246
TG 56:3 - 18:1	0.0790057	0.0326486	0.0479907	0.0519069	0.223681	0.0870465	0.078187	0.814776	0.143248	0.143885	1.24757	0.17198	0.504291	0.504861
TG 56:3 - 20:1	0.0283042	0.0151661	0.0220766	0.0294607	0.095321	0.0380657	0.0325098	0.473678	0.07934	0.0774763	0.577622	0.0823741	0.258098	0.246996
TG 56:4 - 18:1	0.0427435	0.0230332	0.0269058	0.0274862	0.141129	0.0522595	0.0502469	0.730016	0.0511264	0.105216	0.527722	0.130943	0.309005	0.302004
TG 56:4 - 20:1	0.0115678	0.0138549	0.0162556	0.034137	0.092419	0.0336468	0.0340443	0.779542	0.035438	0.0686966	0.337405	0.0664556	0.257507	0.316374
TG 56:5 - 18:1	0.0890967	0.00410839	0.00150914	0.0216668	0.0941602	0.0421083	0.0459006	0.274749	0.0551874	0.0353524	0.330494	0.0708631	0.153329	0.138276
TG 56:5 - 20:1	0	0.00109266	0.00362194	0.00415671	0.0359407	0.0089624	0.0151798	0.16152	0.00889155	0.0312894	0.062716	0.0127947	0.0554423	0.0629971
TG 56:9 - 16:1	0.00164082	0.0013549	0.000388065	0.00140289	0.00633985	0.0022253	0.0023495	0.00729369	0.00141068	0.00359595	0.00321414	0.00179725	0.00346234	0.00233134
TG 48:2 - 18:2	0.0615309	0.0380682	0.045188	0.0489452	0.090767	0.0568999	0.0207576	0.246809	0.103492	0.268902	0.284211	0.128846	0.206452	0.083962
TG 48:3 - 18:2	0.0109935	0.00550699	0.0119438	0.0101839	0.0233503	0.0123957	0.0066053	0.100053	0.0307357	0.0649605	0.130454	0.0264025	0.0705211	0.0447893
TG 50:2 - 18:2	0.756584	0.444012	0.525655	0.664554	1.05483	0.689126	0.237537	3.37698	1.14513	2.16046	3.02431	1.61714	2.2648	0.93512
TG 50:3 - 18:2	0.695709	0.44917	0.558037	0.704302	1.27989	0.737422	0.321083	4.51391	1.91284	1.1154	3.2133	1.96692	2.54447	1.33237
TG 50:4 - 16:2	0.0142752	0.0107955	0.00405312	0.0162631	0.0575498	0.0205873	0.021178	0.156991	0.0469371	0.0312427	0.0816392	0.0905473	0.0814714	0.0487368
TG 50:4 - 18:2	0.0390516	0.0122815	0.0332011	0.0316429	0.189035	0.0610424	0.0722543	0.625904	0.0587783	0.184374	0.280032	0.143224	0.258463	0.220296
TG 52:2 - 18:2	0.16638	0.0798951	0.143368	0.0988777	0.196491	0.137002	0.0478465	0.826775	0.242337	0.331014	0.477581	0.414823	0.458506	0.224097
TG 52:3 - 18:2	4.96497	2.79956	3.49677	3.12912	8.76668	4.63142	2.45518	23.4851	11.0074	7.09363	15.8897	15.5975	14.6147	6.14116
TG 52:4 - 18:2	2.36886	1.31761	2.2168	1.17827	7.12671	2.84165	2.45282	22.0282	5.46364	5.68879	8.04423	9.68758	10.1825	6.84835
TG 52:5 - 16:2	0.00270736	0.000874126	0.00176785	0.00280578	0.0289312	0.00741725	0.0120522	0.055585	0.00388633	0.00821931	0.019767	0.0101416	0.0195198	0.020981
TG 52:5 - 18:2	0.143244	0.0995192	0.130907	0.114985	0.660416	0.229814	0.241277	2.13676	0.265079	0.493158	0.769104	0.661774	0.865175	0.735872
TG 52:6 - 16:2	0.00106654	0.000262238	0.00206968	0.00213031	0.00700955	0.00250766	0.00263249	0.014058	0.000555722	0.00266193	0.00944154	0.00658993	0.00666142	0.00537864
TG 52:6 - 18:2	0.0130445	0.00625	0.00879614	0.00592331	0.0381731	0.0144374	0.0135708	0.116699	0.0138075	0.0212021	0.0340297	0.0246052	0.0420687	0.0423479
TG 53:3 - 18:2	0.0514398	0.0476836	0.0388496	0.0395926	0.143763	0.0642657	0.0447605	0.601788	0.12803	0.116285	0.161069	0.21015	0.243464	0.203589
TG 53:4 - 18:2	0.0128805	0.00537587	0.00280269	0.00452042	0.0465667	0.0144292	0.0183748	0.264573	0.0149617	0.0568346	0.0815589	0.0795926	0.0995041	0.0960914
TG 54:2 - 18:2	0.0849126	0.045236	0.0285443	0.0210433	0.0900527	0.0539578	0.0318838	0.322981	0.0522378	0.0523514	0.127481	0.13351	0.137712	0.110724
TG 54:3 - 18:2	0.316679	0.160883	0.192265	0.183415	0.458925	0.262433	0.12553	1.88654	0.446031	0.629618	1.41856	0.70632	1.01741	0.610315
TG 54:3 - 20:2	0.151448	0.0448427	0.0888237	0.108698	0.199437	0.11865	0.0592421	0.551556	0.20318	0.0657077	0.7182	0.331764	0.374082	0.262682
TG 54:4 - 18:2	0.226516	0.153671	0.252242	0.211109	0.964908	0.361689	0.339142	3.74772	0.420297	1.06566	2.8898	0.839873	1.79267	1.44444
TG 54:4 - 20:2	0.0881122	0.0449738	0.0692049	0.0551283	0.152648	0.0820134	0.0426766	0.540262	0.16941	0.0910195	0.383367	0.190594	0.274931	0.183187
TG 54:5 - 18:2	0.245713	0.175393	0.15113	0.254235	1.15707	0.396708	0.427356	4.79642	0.275296	1.03727	1.54287	0.612521	1.65288	1.82024
TG 54:5 - 20:2	0.00172286	0.00585664	0.00478613	0.00836537	0.0115189	0.00644998	0.00370232	0.0498794	0.0117984	0.0116752	0.0214946	0.0126236	0.0214942	0.0163923
TG 54:6 - 18:2	0.05587	0.0604021	0.0536823	0.0801205	0.494821	0.148979	0.193614	1.62255	0.129569	0.331434	0.300442	0.235697	0.523939	0.618985
TG 54:7 - 18:2	0.00918861	0.0113636	0.00970162	0.00878105	0.0665238	0.0211117	0.0254051	0.208752	0.00654042	0.024798	0.0341503	0.0261457	0.0600774	0.0837238
TG 56:2 - 18:2	0.0183772	0.0118007	0.00672646	0.00743012	0.015805	0.0120279	0.005096	0.0547615	0.0111144	0.0125158	0.0251908	0.0276863	0.0262538	0.0175628
TG 56:3 - 18:2	0.0607105	0.0478584	0.0483788	0.0332537	0.113492	0.0607387	0.0310525	0.248985	0.0697645	0.058189	0.173001	0.141213	0.138231	0.0783881
TG 56:4 - 18:2	0.0347034	0.0153846	0.0187565	0.0099761	0.151442	0.0460525	0.0596298	0.537792	0.0390288	0.0487087	0.381237	0.10531	0.222415	0.224836
TG 56:4 - 20:2	0.0134548	0.00673077	0.00297516	0.0029097	0.0177694	0.00876797	0.00661473	0.0975237	0.00756637	0.0122823	0.107754	0.0255895	0.0501432	0.0485104
TG 56:5 - 18:2	0.0110756	0.00869755	0.0110814	0.0128338	0.0911242	0.0269625	0.0358976	0.283395	0.0129953	0.0587027	0.11354	0.0637597	0.106478	0.105114
TG 56:5 - 20:2	0.00680942	0.00590035	0.00198344	0.00155877	0.0437093	0.0119922	0.0178814	0.0661726	0.0151327	0.00499696	0.0578546	0.0117677	0.0311849	0.0285303
TG 56:7 - 18:2	0.0350316	0.00812937	0.0137547	0.0100281	0.108224	0.0350335	0.0423046	0.254456	0.038644	0.0263858	0.0852149	0.111858	0.103312	0.0913024
TG 56:8 - 18:2	0.0209205	0.00367133	0.0209555	0.0061831	0.0777748	0.025901	0.0300961	0.211576	0.0319326	0.018867	0.0521896	0.100133	0.0829396	0.0782551
TG 56:9 - 18:2	0.000984494	0.000568182	0.000819248	0.000207835	0.00616126	0.0017482	0.00248428	0.0158814	0.00112188	0.000280204	0.00546404	0.0026103	0.00507157	0.00635653
TG 58:10 - 18:2	0.00410206	0.00174825	0.00349258	0.00254598	0.0130369	0.00498515	0.0045898	0.0226457	0.00200915	0.00639798	0.00313379	0.00342334	0.007522	0.00860868
TG 50:3 - 18:3	0.0174748	0.0232517	0.0290617	0.0300322	0.046656	0.0292953	0.0109343	0.115229	0.0671996	0.0832672	0.0924066	0.0716762	0.0859556	0.0191144
TG 50:4 - 18:3	0.0406104	0.0277972	0.0388927	0.0225501	0.0467006	0.0353102	0.00987335	0.223634	0.0729705	0.0570681	0.175613	0.128718	0.131601	0.0696564
TG 52:4 - 18:3	0.36213	0.168881	0.245818	0.128131	0.888338	0.358659	0.309219	2.28687	0.669303	0.422407	1.30245	1.1986	1.17592	0.720272
TG 52:5 - 18:3	0.176881	0.123951	0.161306	0.0882781	0.624922	0.235067	0.220628	1.73184	0.363442	0.365152	0.651386	0.699987	0.762361	0.564138
TG 52:6 - 16:3	0.00426614	0.000874126	4.31183e-06	0.00155877	0.00214305	0.00176928	0.00160739	0.00552909	0.000683965	0.00219493	0.00630775	0.00303821	0.00355079	0.00233636
TG 52:6 - 18:3	0.015916	0.00550699	0.0100466	0.00524784	0.0459416	0.0165318	0.0170018	0.131522	0.0111572	0.0240041	0.0505022	0.0408233	0.0516017	0.0471751
TG 54:4 - 18:3	0.00180491	0.0041958	0.00858055	0.000779383	0.0216091	0.00739394	0.00849552	0.0749368	0.0147907	0.0158315	0.0462836	0.0395824	0.038285	0.0248252
TG 54:4 - 20:3	0.222332	0.0704983	0.0916695	0.109633	0.208813	0.140589	0.0700009	0.575554	0.244047	0.101387	0.778465	0.298986	0.399688	0.272832
TG 54:5 - 18:3	0.0195258	0.00992133	0.0112108	0.00815754	0.0994285	0.0296488	0.0392514	0.404094	0.0449707	0.0770093	0.173765	0.0585391	0.151676	0.149865
TG 54:5 - 20:3	0.118878	0.0507867	0.066704	0.046711	0.19716	0.096048	0.0634206	0.433151	0.21515	0.138888	0.530695	0.246181	0.312813	0.162928
TG 54:6 - 18:3	0.0374108	0.0125437	0.01203	0.0121584	0.120011	0.0388307	0.0466715	0.316099	0.030522	0.0674357	0.137806	0.0460439	0.119581	0.117271
TG 54:6 - 20:3	0.0110756	0.00231643	0.00556226	0.000675465	0.0221002	0.00834598	0.00865405	0.0344686	0.0105587	0.0118153	0.0464845	0.00992768	0.0226509	0.0168316
TG 54:7 - 18:3	0.00886045	0.00594406	0.00534667	0.00457238	0.0565676	0.0162582	0.0225919	0.138051	0.0088488	0.0254051	0.0247489	0.0259318	0.0445971	0.0527309
TG 56:5 - 20:3	0.00590697	0.00703671	0.00271645	0.00914476	0.0339316	0.0117473	0.0126172	0.105347	0.0156885	0.0118153	0.100763	0.0201549	0.0507537	0.0478629
TG 56:6 - 20:3	0.029945	0.00332168	0.00620904	0.00950847	0.0515225	0.0201013	0.0204386	0.11864	0.0078656	0.0141503	0.0831659	0.0191279	0.04859	0.0495356
TG 52:4 - 20:4	0.0446304	0.0243444	0.0159107	0.0224982	0.0262077	0.0267183	0.0107396	0.078466	0.0553584	0.0399757	0.172037	0.0433908	0.0778456	0.0547707
TG 52:5 - 20:4	0.0334728	0.0144231	0.0212142	0.0229139	0.0566122	0.0297272	0.0165071	0.162167	0.0707904	0.0387148	0.228526	0.0673542	0.11351	0.079287
TG 52:6 - 18:4	0.00894249	0.0090472	0.00901173	0.00852125	0.0328154	0.0136676	0.010706	0.119052	0.0241953	0.0283006	0.0461631	0.0487826	0.0532987	0.0382972
TG 52:6 - 20:4	0.00393798	0.00201049	0.00383753	0.00285774	0.00763461	0.00405567	0.00214989	0.0198224	0.00128243	0.00686499	0.0173965	0.00736018	0.0105453	0.00778611
TG 54:4 - 20:4	0.0255148	0.016215	0.0369093	0.0190169	0.0289312	0.0253174	0.00821612	0.0681725	0.038815	0.0380143	0.0666935	0.0467286	0.0516848	0.0147833
TG 54:5 - 20:4	0.395356	0.117526	0.113315	0.163047	0.341638	0.226176	0.132741	1.31286	0.518232	0.24798	1.36726	0.557405	0.800747	0.506897
TG 54:6 - 20:4	0.191074	0.0687937	0.128449	0.069417	0.460309	0.183609	0.162699	0.991412	0.326123	0.262691	0.823704	0.791091	0.639004	0.3244
TG 54:7 - 20:4	0.00845024	0.00677448	0.00599345	0.00561156	0.0492008	0.0152061	0.0190349	0.0684666	0.0186808	0.0233503	0.0374046	0.0175446	0.0330894	0.0212971
TG 56:5 - 20:4	0.0593158	0.0116696	0.0113832	0.011327	0.0763461	0.0340083	0.0314576	0.250985	0.0413372	0.0593098	0.107393	0.0566563	0.103136	0.0862811
TG 56:5 - 22:4	0.0708836	0.00769231	0.029148	0.0475423	0.0685329	0.0447598	0.0268006	0.109935	0.0977643	0.0587961	0.168421	0.129488	0.112881	0.0403821
TG 56:6 - 20:4	0.0476659	0.014729	0.0142722	0.0288372	0.0696937	0.0350396	0.0236781	0.224987	0.0351815	0.0557138	0.184532	0.0642304	0.112929	0.0856938
TG 56:6 - 22:4	0.069735	0.00843531	0.0236288	0.00930063	0.0662113	0.0354622	0.0303111	0.161579	0.0508699	0.0782235	0.159502	0.114126	0.11286	0.048972
TG 56:7 - 20:4	0.0762983	0.0275787	0.0151776	0.0226021	0.111126	0.0505565	0.0415102	0.248221	0.0221861	0.0551534	0.106509	0.0423638	0.0948865	0.0911992
TG 56:8 - 20:4	0.0243662	0.0114073	0.0188858	0.00878105	0.0308956	0.0188672	0.00911458	0.072584	0.010003	0.0351189	0.0332664	0.0213531	0.0344651	0.0235862
TG 54:6 - 20:5	0.0525884	0.0188811	0.0197482	0.00930063	0.125815	0.0452666	0.0479128	0.332922	0.0680118	0.057395	0.175573	0.165775	0.159935	0.110869
TG 54:7 - 20:5	0.0253507	0.0201486	0.0206537	0.017666	0.108626	0.038489	0.039306	0.280513	0.0660881	0.0452062	0.164926	0.160597	0.143466	0.0937792
TG 56:6 - 22:5	0.131102	0.019493	0.0607106	0.0218747	0.174346	0.0815052	0.0687622	0.309923	0.110674	0.118106	0.285737	0.244212	0.213731	0.0937174
TG 56:7 - 22:5	0.103372	0.0410839	0.0563125	0.0179778	0.141664	0.0720821	0.0498939	0.402976	0.033728	0.114837	0.117115	0.24464	0.182659	0.144445
TG 56:8 - 20:5	0.0172286	0.0090472	0.00978786	0.0203159	0.0274578	0.0167675	0.00767146	0.0472913	0.014235	0.0190071	0.0189233	0.029783	0.025848	0.0132751
TG 56:9 - 20:5	0.0158339	0.00887238	0.00375129	0.00389691	0.0166979	0.00981049	0.00625066	0.0178813	0.0097283	0.0104609	0.0147047	0.00817322	0.0121897	0.00399684
TG 54:6 - 22:6	0.0382312	0.00821678	0.025138	0.0252	0.0686668	0.0330906	0.0225627	0.138051	0.0309494	0.0642133	0.171595	0.0726176	0.0954852	0.0575983
TG 54:7 - 22:6	0.0268275	0.0144231	0.0271214	0.0247324	0.0715689	0.0329347	0.0222129	0.125698	0.0418501	0.0396955	0.127722	0.074372	0.0818676	0.0431852
TG 54:8 - 22:6	0.00672738	0.00270979	0.00194032	0.0029097	0.0115189	0.00516121	0.00401017	0.0159991	0.00290685	0.00434316	0.0137405	0.00885789	0.00916948	0.00570412
TG 56:6 - 22:6	0.0370826	0.00738636	0.0136685	0.00103918	0.0216537	0.0161661	0.0139621	0.115993	0.0269739	0.0219493	0.0611491	0.0470709	0.0546273	0.0377424
TG 56:7 - 22:6	0.250964	0.100874	0.155786	0.0881222	0.540941	0.227338	0.186681	1.02894	0.305647	0.266567	0.722539	0.812358	0.62721	0.330991
TG 56:8 - 22:6	0.238576	0.109091	0.141169	0.055544	0.520627	0.213001	0.184416	1.24146	0.261745	0.314669	0.505303	0.877059	0.640047	0.413826
TG 56:9 - 22:6	0.0102551	0.00541958	0.0114264	0.00675465	0.0604965	0.0188704	0.0233992	0.11417	0.0123541	0.00966702	0.0427883	0.0358595	0.0429677	0.0423273
TG 58:10 - 22:6	0.00910657	0.00703671	0.00896861	0.00550764	0.0518796	0.0164998	0.0198336	0.0938768	0.00752362	0.0154112	0.021816	0.0184004	0.0314056	0.0353197
TG 58:8 - 22:6	0.0148495	0.00891608	0.0139272	0.0064429	0.0450487	0.0178369	0.0156052	0.10717	0.00636943	0.0348386	0.0582965	0.0227224	0.0458794	0.0391469

## Sheet: AcylCarnitine
Acylcarnitine - Intensity normalised to IS	Control_12mo							Cdk1 cKO__12mo
	Control 1	Control 2	Control 3	Control 4	Control 5	Average	Std. Dev.	KO 1	KO 2	KO 3	KO 4	KO 5	Average	Std. Dev.
AcylCarnitine 16:0-d3 (IS)	1	1	1	1	1	1	0	1	1	1	1	1	1	0
AcylCarnitine 16:0	4.14568	8.34431	5.77898	8.67446	1.90527	5.76974	2.85647	6.38723	14.6676	13.1023	5.36995	12.3642	10.3782	4.20636
AcylCarnitine 16:1	10.7388	21.7305	15.6602	21.6391	4.95508	14.9447	7.22591	10.7765	45.3763	21.9225	13.4388	40.0896	26.3208	15.6493
AcylCarnitine 18:0	1.40339	2.60544	1.9448	2.5488	0.645503	1.82959	0.824042	3.42367	4.0544	3.74237	3.1144	3.38929	3.54483	0.361534
AcylCarnitine 18:1	27.6993	44.488	38.7583	41.3831	13.1917	33.1041	12.8045	24.313	70.8571	49.9144	25.6494	75.9507	49.3369	24.285
AcylCarnitine 18:2	8.4167	14.7254	12.9756	10.8038	4.98793	10.3819	3.83172	7.56611	25.7481	17.5733	5.91454	29.1823	17.1969	10.4518
AcylCarnitine 20:4	1.16539	1.07334	1.2151	1.35012	0.720256	1.10484	0.237109	1.00671	2.10943	1.42793	1.2396	2.5155	1.65983	0.630722

## Sheet: LPC
LPC - Intensity normalised to IS	Control_12mo							Cdk1 cKO__12mo
	Control 1	Control 2	Control 3	Control 4	Control 5	Average	Std. Dev.	KO 1	KO 2	KO 3	KO 4	KO 5	Average	Std. Dev.
LPC 20:0 (IS)	1	1	1	1	1	1	0	1	1	1	1	1	1	0
LPC 15:0/LPC O-16:0	0.00264536	0.00302557	0.00240702	0.00450434	0.00164569	0.0028456	0.00105547	0.002228	0.00253099	0.00247739	0.001069	0.00202993	0.00206706	0.000593088
LPC 16:0	0.616985	0.684551	0.580037	0.942207	0.41492	0.64774	0.192224	0.504208	0.661261	0.58437	0.433495	0.503302	0.537327	0.0874763
LPC 16:1	0.0398383	0.065935	0.0621663	0.113433	0.0202295	0.0603203	0.0349379	0.0267023	0.0920826	0.0427588	0.0291522	0.0370825	0.0455557	0.026781
LPC 17:0/LPC O-18:0	0.00899687	0.00768079	0.00754214	0.0118639	0.00702782	0.00862231	0.00195217	0.00831235	0.0101182	0.00812731	0.00417998	0.00907732	0.00796303	0.00225537
LPC 17:1/LPC O-18:1/LPC P-18:0	0.00472151	0.00566348	0.00509466	0.00885548	0.00263764	0.00539455	0.00224688	0.00345675	0.00741213	0.00408012	0.00239797	0.0042022	0.00430983	0.0018756
LPC 18:0	0.271187	0.229915	0.228738	0.322182	0.209462	0.252297	0.0450873	0.256978	0.279458	0.267344	0.220712	0.226507	0.2502	0.0256259
LPC 18:1	0.415514	0.474908	0.470117	0.733977	0.199668	0.458837	0.190482	0.264621	0.657311	0.390206	0.330552	0.340565	0.396651	0.152424
LPC 18:2	1.38502	1.67082	1.7887	2.56397	0.856044	1.65291	0.62361	0.857801	3.14923	1.52814	0.698164	1.98776	1.64422	0.98869
LPC 18:3	0.0284266	0.0356382	0.0386122	0.0493168	0.014954	0.0333896	0.0127525	0.0150722	0.0695342	0.0332027	0.0176812	0.0369	0.0344781	0.0217667
LPC 20:1	0.0108292	0.0100432	0.0102874	0.019211	0.00619425	0.011313	0.00478219	0.00719895	0.0151666	0.00967286	0.00743869	0.00857782	0.00961098	0.00325856
LPC 20:2	0.0211148	0.0136701	0.0168214	0.0230188	0.00900701	0.0167264	0.00565226	0.0103691	0.0247956	0.014346	0.0111284	0.0150373	0.0151353	0.00576033
LPC 20:3	0.20085	0.218819	0.221355	0.290014	0.127165	0.21164	0.0581827	0.109771	0.401293	0.19038	0.156399	0.250489	0.221667	0.112756
LPC 20:4	1.03208	0.739944	1.03181	1.36056	0.519849	0.93685	0.320266	0.497792	1.99417	0.930523	0.541108	1.30582	1.05388	0.619475
LPC 20:5	0.0170611	0.0239004	0.0264837	0.0408751	0.0109799	0.02386	0.0112752	0.00962345	0.0477795	0.020023	0.0120607	0.0285727	0.0236119	0.0154165
LPC 22:0	0.00394457	0.00577051	0.00446443	0.0312836	0.00293834	0.00968029	0.0121197	0.0032636	0.00895845	0.0043711	0.00235944	0.00595397	0.00498131	0.00259619
LPC 22:1	0.00299289	0.0035164	0.00301246	0.00884965	0.00157256	0.00398879	0.00281222	0.00169635	0.0115126	0.00416753	0.00155502	0.00518937	0.00482417	0.00405494
LPC 22:2	0.00171116	0.00272274	0.00180421	0.00559361	0.000919256	0.00255019	0.00181745	0.00102361	0.0127536	0.00255831	0.000939347	0.00406287	0.00426754	0.00491366
LPC 22:4	0.00917941	0.00800319	0.0073667	0.0123468	0.00414239	0.0082077	0.00297289	0.00507906	0.0184007	0.00943502	0.00661823	0.008578	0.00962221	0.0051926
LPC 22:5	0.0499006	0.0457537	0.0518351	0.0465072	0.0332937	0.0454581	0.00723812	0.0238426	0.0896555	0.0462534	0.0270303	0.055259	0.0484082	0.0265208
LPC 22:6	0.564946	0.605454	0.58246	0.615715	0.358472	0.545409	0.106358	0.399449	0.956146	0.628345	0.326009	0.60298	0.582586	0.245677

## Sheet: LPE
LPE - Intensity normalised to IS	Control_12mo							Cdk1 cKO__12mo
	Control 1	Control 2	Control 3	Control 4	Control 5	Average	Std. Dev.	KO 1	KO 2	KO 3	KO 4	KO 5	Average	Std. Dev.
LPE 14:0 (IS)	1	1	1	1	1	1	0	1	1	1	1	1	1	0
LPE 16:0	1.13183	1.24241	0.953057	1.33043	0.619343	1.05541	0.281546	1.01455	0.898109	0.740583	0.568072	0.846558	0.813574	0.168985
LPE 16:1	0.0838429	0.105317	0.0912164	0.154771	0.0404743	0.0951243	0.041203	0.0623712	0.0996519	0.0654369	0.0444963	0.0666625	0.0677238	0.019962
LPE 18:0	0.926564	0.832943	0.760652	0.720243	0.700554	0.788191	0.0924735	1.1826	0.590784	0.638268	0.634206	0.737924	0.756756	0.24408
LPE 18:1	0.691051	0.664314	0.61218	0.853079	0.374511	0.639027	0.173099	0.681497	0.609128	0.433082	0.406178	0.537812	0.533539	0.11612
LPE 18:2	0.773796	1.17909	1.06775	1.13432	0.591689	0.94933	0.25483	0.730966	1.09724	0.757896	0.326733	1.05123	0.792813	0.308921
LPE 20:0	0.0116672	0.0150621	0.0111552	0.0104143	0.0119601	0.0120518	0.00178209	0.0153131	0.00757023	0.0100616	0.00517888	0.0118463	0.00999402	0.00389835
LPE 20:1	0.0407014	0.0377304	0.0300446	0.0435681	0.0203528	0.0344795	0.00936902	0.0319361	0.0282586	0.0248606	0.0208839	0.0275561	0.026699	0.00411672
LPE 20:2	0.0201223	0.0203838	0.0187425	0.0241154	0.0130598	0.0192848	0.004009	0.017579	0.0194336	0.0137143	0.0101025	0.0172198	0.0156099	0.00370859
LPE 20:3	0.111447	0.135661	0.127113	0.141315	0.0764077	0.118389	0.0260319	0.0922894	0.129777	0.0863235	0.0684845	0.117727	0.0989202	0.0246719
LPE 20:4	1.76493	1.87596	1.78901	1.82863	0.973555	1.64642	0.378489	1.18987	2.26071	1.48348	1.01355	1.61412	1.51235	0.480634
LPE 20:5	0.0349158	0.0606376	0.0499598	0.0707101	0.0283214	0.0489089	0.0175614	0.030363	0.076036	0.0438017	0.0212056	0.053732	0.0450276	0.0213385
LPE 22:6	1.60825	2.0277	1.72946	1.4471	1.1736	1.59722	0.318166	1.58879	1.35909	1.40737	1.02949	1.36106	1.34916	0.202017

## Sheet: PG
PG - Intensity normalised to IS	Control_12mo							Cdk1 cKO__12mo
	Control 1	Control 2	Control 3	Control 4	Control 5	Average	Std. Dev.	KO 1	KO 2	KO 3	KO 4	KO 5	Average	Std. Dev.
PG 28:0 (IS)	1	1	1	1	1	1	0	1	1	1	1	1	1	0
PG 32:0	0.121586	0.121536	0.104369	0.160348	0.0760643	0.116781	0.030642	0.0824295	0.0917748	0.0840745	0.107599	0.116946	0.0965648	0.0151321
PG 32:1	0.164954	0.237543	0.194711	0.274586	0.0661315	0.187585	0.0796536	0.125645	0.12718	0.109569	0.153078	0.121318	0.127358	0.0159486
PG 32:2	0.0323057	0.0478616	0.0333211	0.044106	0.023898	0.0362985	0.00965972	0.0331886	0.0184856	0.0231306	0.0170638	0.0243531	0.0232443	0.00634378
PG 34:0	0.0755087	0.0292853	0.00853084	0.0184871	0.0266314	0.0316887	0.0257979	0.0324757	0.0404257	0.083327	0.0242198	0.0416066	0.044411	0.0228492
PG 34:1	4.18141	4.40338	4.11099	5.86041	2.39706	4.19065	1.23052	3.0224	3.24533	3.50038	3.25275	3.91629	3.38743	0.340597
PG 34:2	3.10101	3.40165	3.49133	4.75131	1.67361	3.28378	1.09962	2.89961	2.12868	2.69482	1.46914	3.30517	2.49948	0.715277
PG 34:3	0.309056	0.351827	0.324549	0.425744	0.186387	0.319512	0.0868711	0.264443	0.224908	0.272089	0.246405	0.300326	0.261634	0.028262
PG 36:1	0.257691	0.171654	0.221819	0.216434	0.0996343	0.193446	0.0606968	0.227145	0.177135	0.215578	0.205805	0.170128	0.199158	0.0246212
PG 36:2	1.43766	1.09261	1.36765	1.68951	0.72459	1.26241	0.368201	1.21596	1.03516	1.0031	0.855501	1.40146	1.10224	0.210758
PG 36:3	1.11124	1.02351	1.09386	1.10781	0.564641	0.980212	0.235021	0.902898	0.603025	0.689096	0.718618	0.97644	0.778015	0.155744
PG 36:4	2.4437	1.9745	2.16007	1.79892	1.11425	1.89829	0.499097	1.73988	1.36075	1.35217	1.40134	1.77816	1.52646	0.213537
PG 36:5	0.101606	0.119254	0.123751	0.121312	0.0457649	0.102338	0.0328091	0.09596	0.0734351	0.0954722	0.0587715	0.0942814	0.083584	0.0167898
PG 38:4	0.776679	0.483518	0.55522	0.679245	0.269877	0.552908	0.194269	0.597711	0.314577	0.395887	0.442288	0.540892	0.458271	0.112988
PG 38:5	0.52751	0.315897	0.437174	0.532368	0.17887	0.398364	0.150931	0.29979	0.215161	0.226745	0.332126	0.314534	0.277671	0.0531847
PG 38:6	1.1158	0.648173	0.750848	1.02302	0.37083	0.781733	0.298936	0.764484	0.399362	0.458398	0.436657	0.888758	0.589532	0.221854
PG 40:5	0.0392013	0.0432325	0.0411192	0.0494787	0.0271461	0.0400356	0.00817621	0.0532724	0.0240347	0.0212654	0.0373609	0.0338339	0.0339535	0.0126907
PG 40:6	0.245249	0.151584	0.20035	0.203395	0.1087	0.181855	0.0526612	0.216592	0.101942	0.112218	0.125548	0.16619	0.144498	0.0471175
PG 40:7	0.17675	0.11816	0.157347	0.187555	0.0757563	0.143114	0.0460129	0.144514	0.0662583	0.0875123	0.0820218	0.137378	0.103537	0.0351201

## Sheet: PI
PI - Intensity normalised to IS	Control_12mo							Cdk1 cKO__12mo
	Control 1	Control 2	Control 3	Control 4	Control 5	Average	Std. Dev.	KO 1	KO 2	KO 3	KO 4	KO 5	Average	Std. Dev.
PI 12:0/13:0 (IS)	1	1	1	1	1	1	0	1	1	1	1	1	1	0
PI 32:1	0.0609479	0.08946	0.0697743	0.125339	0.0226577	0.0736359	0.0377436	0.0465579	0.0352686	0.046892	0.0625366	0.039378	0.0461266	0.0104103
PI 34:0	0.00898875	0.0206993	0.0170684	0.00785762	0.00753979	0.0124308	0.00605308	0.00678656	0.00535234	0.00912945	0.00531509	0.00967165	0.00725102	0.00205891
PI 34:1	0.338215	0.305504	0.271849	0.487864	0.170407	0.314768	0.115412	0.201343	0.137461	0.168814	0.27458	0.220031	0.200446	0.0520769
PI 34:2	1.75345	2.54644	2.241	2.70151	1.80948	2.21037	0.425613	1.86772	1.47204	2.00086	1.176	2.43031	1.78939	0.484405
PI 34:3	0.0706378	0.135991	0.109986	0.17157	0.079404	0.113518	0.0415031	0.0849997	0.102649	0.107643	0.0581011	0.0991961	0.0905179	0.0199817
PI 36:0	0.00780269	0.00571427	0.00299483	0.00106083	0.00232587	0.0039797	0.00273171	0.00397764	0.00327572	0.00667783	0.00958988	0.00383654	0.00547152	0.00265247
PI 36:1	0.0904348	0.130243	0.108666	0.204941	0.105962	0.128049	0.0452646	0.103794	0.0582636	0.0770507	0.0600098	0.101926	0.0802088	0.0219514
PI 36:2	1.95434	2.22593	2.70492	2.71053	1.8821	2.29556	0.397495	2.39822	1.49876	2.0683	1.27253	2.57263	1.96209	0.562231
PI 36:3	1.50551	1.78616	1.53785	2.58561	1.16069	1.71516	0.535155	1.68529	1.42611	1.78064	1.30247	1.5176	1.54242	0.192923
PI 36:4	6.37685	5.07672	4.53236	7.33112	3.27274	5.31796	1.58369	4.50631	4.9008	4.5095	5.64978	4.70871	4.85502	0.47332
PI 36:5	0.116396	0.158937	0.13675	0.224505	0.0938797	0.146094	0.0500223	0.099485	0.129728	0.142177	0.121487	0.13533	0.125641	0.0164728
PI 38:2	0.153934	0.196041	0.263088	0.275024	0.146499	0.206917	0.0599366	0.250675	0.182253	0.187694	0.219803	0.18913	0.205911	0.0290259
PI 38:3	4.2204	3.40829	3.5157	3.87102	3.14748	3.63258	0.41883	4.01534	2.52418	2.59067	3.40781	4.06193	3.31999	0.742786
PI 38:4	44.0025	34.2957	40.4391	41.4318	28.3753	37.7089	6.31843	37.1032	30.5771	37.0344	32.7572	38.9817	35.2907	3.4852
PI 38:5	2.44226	1.98013	1.82229	3.69725	1.58384	2.30516	0.839021	1.99639	2.17332	2.01708	2.5742	2.05618	2.16343	0.239609
PI 38:6	0.399181	0.431586	0.335012	0.44894	0.297663	0.382476	0.0643321	0.342272	0.328312	0.326927	0.31643	0.343119	0.331412	0.0112825
PI 40:4	0.679873	0.561676	0.559565	0.606793	0.487794	0.57914	0.0706117	0.57037	0.373209	0.516367	0.479094	0.564113	0.50063	0.0803762
PI 40:5	0.450085	0.308577	0.395723	0.421258	0.318771	0.378883	0.0626607	0.373837	0.296415	0.290126	0.34269	0.384218	0.337457	0.0431917
PI 40:6	0.542254	0.560325	0.563718	0.578045	0.47654	0.544176	0.0399003	0.595694	0.374894	0.521282	0.408121	0.552697	0.490538	0.0949116
PI 40:7	0.0377531	0.0374546	0.0401297	0.0557904	0.0274376	0.0397131	0.010226	0.0339396	0.0312835	0.0341353	0.0325858	0.0330814	0.0330051	0.00115067

## Sheet: SM
SM - Intensity normalised to IS	Control_12mo							Cdk1 cKO__12mo
	Control 1	Control 2	Control 3	Control 4	Control 5	Average	Std. Dev.	KO 1	KO 2	KO 3	KO 4	KO 5	Average	Std. Dev.
SM 30:1 (IS)	1	1	1	1	1	1	0	1	1	1	1	1	1	0
SM 32:1	0.00996874	0.00775992	0.00872282	0.0193702	0.00670164	0.0105047	0.00510041	0.0101421	0.0120082	0.0104223	0.00615419	0.00875492	0.00949633	0.00219679
SM 33:1	0.0389776	0.0408549	0.0329732	0.0605506	0.0245284	0.0395769	0.0133412	0.0399305	0.0493472	0.0412063	0.0301833	0.0305276	0.038239	0.00805326
SM 34:0	0.0799246	0.0956757	0.0713018	0.12984	0.0455164	0.0844518	0.0312069	0.0809959	0.0681828	0.078604	0.0512639	0.0619108	0.0681915	0.0122307
SM 34:1	1.11367	0.930522	0.960767	1.37853	0.714085	1.01952	0.246181	1.0375	1.22271	1.27131	0.959512	0.977492	1.0937	0.143924
SM 34:2	0.0258405	0.0294394	0.0280057	0.0452848	0.0171155	0.0291372	0.0102165	0.0283962	0.0393376	0.0386076	0.0201061	0.0274883	0.0307872	0.00813869
SM 35:1	0.0164382	0.0188381	0.0187861	0.0270795	0.0132126	0.0188709	0.00513137	0.0222078	0.0199838	0.0246134	0.0142274	0.0193048	0.0200675	0.00387111
SM 36:1	0.171799	0.181121	0.164141	0.190877	0.116576	0.164903	0.0288155	0.180774	0.185823	0.333424	0.150023	0.142951	0.198599	0.077645
SM 36:2	0.00824297	0.0107118	0.0109903	0.0182359	0.00824014	0.0112842	0.00410046	0.0132004	0.0146701	0.022016	0.0118791	0.0110995	0.014573	0.00437648
SM 37:1	0.0195463	0.022729	0.022677	0.0253485	0.0173049	0.0215211	0.00312728	0.0264286	0.0256014	0.03248	0.0165309	0.0232416	0.0248565	0.00576775
SM 39:1	0.146913	0.205199	0.207302	0.148236	0.123368	0.166204	0.0378801	0.162581	0.130183	0.159895	0.0913659	0.164163	0.141638	0.031376
SM 40:0	0.106057	0.0701798	0.0496923	0.0475038	0.0127472	0.0572359	0.0342121	0.050516	0.0507226	0.0344267	0.0364849	0.0380363	0.0420373	0.00793853
SM 40:1	2.17227	3.16859	3.15952	2.37305	2.21053	2.61679	0.505245	2.76713	2.00423	2.81097	1.70482	2.77511	2.41245	0.520461
SM 40:2	0.537186	0.602816	0.54794	0.648969	0.358797	0.539142	0.110365	0.51558	0.427503	0.517117	0.422956	0.41219	0.459069	0.0525863
SM 41:0	0.00937407	0.00708232	0.00650029	0.0240807	0.0145264	0.0123128	0.00730006	0.0197511	0.0115596	0.0233774	0.0100008	0.0117528	0.0152884	0.00590995
SM 41:1	0.674511	0.797793	0.805715	0.759435	0.465376	0.700566	0.141393	0.628208	0.548456	0.675966	0.403932	0.724348	0.596182	0.125554
SM 41:2	0.180243	0.177419	0.194646	0.227472	0.0988018	0.175716	0.0473715	0.176282	0.159412	0.156253	0.105528	0.137558	0.147007	0.0269547
SM 42:0	0.00739883	0.0173011	0.0117387	0.00344929	0.00988838	0.00995527	0.00514805	0.0578511	0.0222467	0.0203916	0.00967989	0	0.0220339	0.0219302
SM 42:1	1.45311	1.83567	1.65921	1.8142	0.994123	1.55126	0.347027	1.09769	1.12247	1.54921	0.867692	1.53536	1.23448	0.298067
SM 42:2	2.1125	2.43765	2.29894	3.29395	1.68004	2.36462	0.592771	2.69027	2.22427	2.59948	1.76753	2.1761	2.29153	0.369544
SM 42:3	0.360077	0.404968	0.350235	0.437035	0.275576	0.365578	0.0612854	0.388037	0.334243	0.435585	0.279887	0.325523	0.352655	0.060207
SM 43:0	0.0213641	0.0283719	0.0227549	0.0393935	0.0194214	0.0262612	0.00806182	0.0225933	0.0341575	0.031364	0.018336	0.026666	0.0266234	0.00640626
SM 43:1	0.0462596	0.0625803	0.0460199	0.0953264	0.0347893	0.0569951	0.0236077	0.0521375	0.050097	0.0525282	0.0307791	0.0507436	0.0472571	0.00926484
SM 43:2	0.0193852	0.0222631	0.0202158	0.0419515	0.0125567	0.0232745	0.011059	0.0221321	0.0272562	0.0253688	0.0152282	0.020874	0.0221719	0.00463601
SM 44:1	0.00637895	0.00681915	0.00699887	0.00908716	0.00460209	0.00677724	0.00160285	0.00573375	0.007466	0.00700438	0.00450093	0.00536599	0.00601421	0.00121213
SM 44:2	0.00774206	0.00778783	0.006554	0.0117918	0.00493893	0.00776293	0.00253326	0.00769356	0.00917448	0.00974387	0.00471148	0.00757631	0.00777994	0.0019536

## Sheet: PC
PC - Intensity normalised to IS	Control_12mo							Cdk1 cKO__12mo
	Control 1	Control 2	Control 3	Control 4	Control 5	Average	Std. Dev.	KO 1	KO 2	KO 3	KO 4	KO 5	Average	Std. Dev.
PC 28:0 (IS)	1	1	1	1	1	1	0	1	1	1	1	1	1	0
PC 31:0/PC O-32:0	0.0147706	0.0235429	0.0138611	0.0294768	0.0114325	0.0186168	0.00760311	0.014684	0.0253264	0.0203551	0.0112292	0.0145519	0.0172293	0.00558976
PC 32:0	0.325548	0.324412	0.30137	0.453998	0.199392	0.320944	0.0906843	0.25765	0.421	0.319919	0.251259	0.236947	0.297355	0.076072
PC 32:1	0.196939	0.25405	0.183939	0.309595	0.0946967	0.207844	0.0805932	0.130039	0.178221	0.132753	0.166118	0.128491	0.147124	0.0233101
PC 32:2	0.0319046	0.0421306	0.0359091	0.0571558	0.0176271	0.0369454	0.0144484	0.0312042	0.0252982	0.0276915	0.0221977	0.0217797	0.0256343	0.0039382
PC 33:0	0.0116664	0.00944912	0.0101093	0.0103953	0.00551453	0.00942694	0.00233056	0.00741351	0.0113051	0.00824894	0.00448088	0.0071429	0.00771827	0.00245214
PC 33:1/PC O-34:1	0.0422717	0.0500371	0.0358409	0.0635009	0.021486	0.0426273	0.0156824	0.030695	0.0517227	0.0388097	0.0250497	0.0274724	0.0347499	0.0108173
PC 33:2/PC O-34:2/PC P-34:1	0.0220339	0.0312646	0.0260912	0.0347651	0.0190709	0.0266451	0.00644618	0.0255099	0.0214189	0.0266611	0.00932303	0.0223079	0.0210442	0.00690318
PC 34:0	0.0479385	0.048009	0.0367065	0.022648	0.0254643	0.0361533	0.0120042	0.060058	0.0346478	0.0411164	0.0358811	0.0181904	0.0379787	0.0150367
PC 34:1	1.87262	1.77066	1.93122	2.53511	0.947734	1.81147	0.567768	1.45979	1.8997	1.23986	1.53387	1.38012	1.50267	0.247253
PC 34:2	4.26848	4.63735	4.34451	5.27357	2.84534	4.27385	0.891242	4.01551	3.8131	4.28995	2.62375	4.17582	3.78362	0.672705
PC 34:3	0.189017	0.33835	0.338927	0.390581	0.1944	0.290255	0.0924454	0.269955	0.24218	0.312715	0.164255	0.207482	0.239317	0.0569688
PC 34:4	0.0167558	0.0208921	0.016817	0.0215671	0.0122351	0.0176534	0.00376396	0.0146567	0.0137408	0.0204636	0.0117179	0.0129215	0.0147001	0.0033984
PC 35:1/PC O-36:1	0.027473	0.0273224	0.0240702	0.0495785	0.0149652	0.0286819	0.0127416	0.0215821	0.0339723	0.0250581	0.0200265	0.02392	0.0249118	0.00543256
PC 35:2/PC O-36:2	0.0586315	0.0636677	0.0555759	0.0873313	0.0501238	0.063066	0.014426	0.0634182	0.0572494	0.0711661	0.02895	0.0714996	0.0584567	0.017524
PC 35:3/PC O-36:3/PC P-36:2	0.0207448	0.0243249	0.0140718	0.0252659	0.0155158	0.0199846	0.00505569	0.0178805	0.01791	0.0228263	0.00985337	0.0160169	0.0168974	0.00467808
PC 35:4/PC O-36:4/PC P-36:3	0.0207971	0.0190286	0.0196221	0.0271681	0.0133027	0.0199837	0.00494863	0.0152688	0.0203151	0.0173028	0.0126262	0.0155449	0.0162116	0.00283804
PC 36:0/PC 37:7/PC O-38:7/PC P-38:6	0.0135359	0.0098468	0.014523	0.0305127	0.00817271	0.0153182	0.00888365	0.0141747	0.0144739	0.0137123	0.00516155	0.0122764	0.0119598	0.00389276
PC 36:1	0.185826	0.146126	0.139162	0.204204	0.105349	0.156133	0.039242	0.144379	0.160611	0.184173	0.228388	0.136368	0.170784	0.0370224
PC 36:2	1.76491	1.62284	1.72609	2.03621	1.10918	1.65185	0.339616	1.60896	1.55425	1.69316	1.39019	1.60969	1.57125	0.112732
PC 36:3	1.01439	1.00412	0.872409	1.17977	0.68848	0.951835	0.183213	0.795986	0.824385	0.860382	0.767319	0.737911	0.797197	0.0478031
PC 36:4	2.88443	2.40551	2.32655	2.11871	1.66921	2.28088	0.442248	1.87658	2.00461	2.36638	1.90741	1.89377	2.00975	0.205471
PC 36:5	0.143319	0.204448	0.163149	0.175568	0.124694	0.162235	0.0305276	0.118516	0.110623	0.163844	0.111351	0.114955	0.123858	0.0225736
PC 37:4/PC O-38:4/PC P-38:3	0.0577804	0.0469058	0.0370216	0.0507513	0.0324159	0.044975	0.0102721	0.0473855	0.040044	0.054891	0.0253259	0.0361739	0.0407641	0.0112176
PC 37:5/PC O-38:5/PC P-38:4	0.0230246	0.0168191	0.0155773	0.0236057	0.0131098	0.0184273	0.00466197	0.0169651	0.0168632	0.0193893	0.0132737	0.014094	0.0161171	0.00245768
PC 37:6/PC O-38:6/PC P-38:5	0.00873796	0.00922102	0.00866602	0.0100265	0.00514332	0.00835896	0.00187763	0.00661073	0.00648951	0.0097541	0.00443046	0.00516128	0.00648922	0.00204182
PC 38:2	0.0742073	0.0744034	0.0648461	0.0759588	0.0551087	0.0689049	0.00887293	0.0630803	0.0537438	0.0717257	0.0556678	0.0555004	0.0599436	0.00750199
PC 38:3	0.272547	0.192719	0.205794	0.243656	0.163545	0.215652	0.0428939	0.221204	0.186211	0.21333	0.260111	0.217897	0.219751	0.0264605
PC 38:4	1.42374	0.967886	1.02533	1.09593	0.867349	1.07605	0.211609	1.20683	0.928449	1.27865	1.26628	1.02452	1.14094	0.156303
PC 38:5	0.587615	0.447763	0.420921	0.541964	0.33721	0.467095	0.0993812	0.360867	0.331751	0.472859	0.40752	0.32524	0.379647	0.0613844
PC 38:6	1.7052	1.65946	1.55968	1.47855	1.21073	1.52273	0.195351	1.38519	1.22923	1.60496	1.23932	1.4475	1.38124	0.15629
PC 38:7/PC 37:0/PC O-38:0	0.0452686	0.0588214	0.0458386	0.052049	0.0384329	0.0480821	0.00769945	0.0417873	0.0396322	0.0650206	0.0340533	0.0374273	0.0435841	0.0123198
PC 38:8/PC 37:1/PC O-38:1/PC P-38:0	0.00882205	0.00747727	0.00498974	0.0179693	0.0051842	0.00888852	0.005324	0.0101235	0.0109543	0.00895537	0.00579636	0.00732613	0.00863112	0.00208975
PC 38:9/PC 37:2/PC O-38:2/PC P-38:1	0.0366312	0.0304825	0.0321903	0.0507865	0.0247173	0.0349615	0.0098222	0.037068	0.03265	0.0380685	0.0154081	0.0329692	0.0312327	0.00916819
PC 39:4/PC O-40:4/PC P-40:3	0.0286747	0.0239366	0.020979	0.026743	0.0185873	0.0237841	0.00411013	0.0217446	0.0221601	0.0233532	0.0127158	0.0196565	0.019926	0.00424569
PC 40:4	0.0419098	0.038317	0.0328609	0.0378881	0.0258503	0.0353652	0.00621922	0.0319974	0.0262316	0.0378538	0.0249329	0.0325676	0.0307167	0.00523385
PC 40:5	0.0613135	0.0523516	0.056929	0.0626795	0.0425976	0.0551743	0.0081123	0.0535005	0.0431032	0.0591665	0.0545901	0.0365046	0.049373	0.00928807
PC 40:6	0.374571	0.297879	0.275217	0.285823	0.260272	0.298752	0.0445844	0.386563	0.269723	0.360034	0.286862	0.340075	0.328651	0.0492139
PC 40:7	0.154512	0.134207	0.127806	0.122999	0.0991313	0.127731	0.019997	0.126574	0.0743162	0.14857	0.124395	0.0992589	0.114623	0.0285107
PC 40:8/PC 39:1/PC O-40:1/PC P-40:0	0.0622888	0.0582301	0.0558327	0.0471605	0.0564389	0.0559902	0.00554253	0.0595667	0.0537748	0.0647142	0.037508	0.0493394	0.0529806	0.0104205

## Sheet: PE
PE - Intensity normalised to IS	Control_12mo							Cdk1 cKO__12mo
	Control 1	Control 2	Control 3	Control 4	Control 5	Average	Std. Dev.	KO 1	KO 2	KO 3	KO 4	KO 5	Average	Std. Dev.
PE 28:0 (IS)	1	1	1	1	1	1	0	1	1	1	1	1	1	0
PE 32:0	0.00898861	0.00759483	0.00676668	0.00935347	0.00658255	0.00785723	0.00126508	0.00968754	0.0117607	0.0081902	0.0095024	0.00655498	0.00913916	0.00192896
PE 32:1	0.02942	0.0252851	0.0280371	0.0226688	0.024805	0.0260432	0.00268666	0.0384829	0.0472981	0.0400658	0.0487498	0.0179013	0.0384996	0.0123412
PE 33:1/PE O-34:1/PE P-34:0	0.0152242	0.0130386	0.0121404	0.0152128	0.01126	0.0133752	0.00179636	0.0216925	0.0244667	0.0107014	0.0140114	0.0110763	0.0163897	0.00631671
PE 34:0	0.00764543	0.00597048	0.0051724	0.00747206	0.00540082	0.00633224	0.00115837	0.00463317	0.0129335	0.00390278	0.00813532	0.00415771	0.0067525	0.0038556
PE 34:1	0.200723	0.122116	0.137623	0.170763	0.15856	0.157957	0.0303782	0.233189	0.246308	0.268175	0.269696	0.108103	0.225094	0.0671708
PE 34:2	0.906956	0.584646	1.00522	0.439552	0.960144	0.779303	0.251673	0.791764	1.25593	1.10171	0.999784	0.67347	0.964532	0.234275
PE 34:3	0.0775722	0.0581921	0.09336	0.039845	0.0768976	0.0691734	0.0205909	0.0706394	0.125335	0.110758	0.114325	0.0575712	0.0957257	0.0297224
PE 35:1/PE O-36:1/PE P-36:0	0.0123287	0.00658877	0.00839244	0.00578287	0.0077752	0.0081736	0.0025347	0.0123607	0.0124209	0.00969923	0.0109568	0.00621565	0.0103306	0.00255998
PE 35:2/PE O-36:2/PE P-36:1	0.0343678	0.0217633	0.0336008	0.0124313	0.0356944	0.0275715	0.0101426	0.0268586	0.0345537	0.0288948	0.0327827	0.022027	0.0290234	0.00495907
PE 35:3/PE O-36:3/PE P-36:2	0.0103538	0.00649421	0.00897481	0.00409386	0.0104799	0.00807931	0.00274474	0.010276	0.0115135	0.00922828	0.00947148	0.00635755	0.00936938	0.00190531
PE 35:4/PE O-36:4/PE P-36:3	0.00540118	0.00859427	0.0080548	0.00708093	0.0085392	0.00753407	0.00133791	0.0101491	0.0101114	0.00774825	0.0177132	0.00627293	0.010399	0.0044072
PE 35:5/PE O-36:5/PE P-36:4	0.00533423	0.00485291	0.00729275	0.00352901	0.0052162	0.00524502	0.00135097	0.00623641	0.00466332	0.00591889	0.0104197	0.00308573	0.00606482	0.002732
PE 36:1	0.0946427	0.0399713	0.0639858	0.0617032	0.0684296	0.0657465	0.019532	0.0767402	0.0561076	0.0733279	0.072665	0.0403164	0.0638314	0.0153905
PE 36:2	0.893674	0.474467	0.750618	0.426901	0.834289	0.67599	0.212527	0.649351	0.83152	0.79463	0.671652	0.572665	0.703964	0.106954
PE 36:3	0.52413	0.317731	0.49144	0.263628	0.497073	0.4188	0.119154	0.400885	0.595919	0.612528	0.589772	0.390405	0.517902	0.111976
PE 36:4	1.52627	1.15628	1.60255	1.26152	1.59641	1.42861	0.206178	1.73445	1.82501	1.71404	1.67754	1.08675	1.60756	0.29617
PE 36:5	0.0987408	0.0812544	0.129431	0.075267	0.1154	0.100019	0.0227379	0.101824	0.156992	0.138488	0.16277	0.0830166	0.128618	0.0348792
PE 36:6	0.00611274	0.00511697	0.00709431	0.00315753	0.00486383	0.00526908	0.00147387	0.00332809	0.00811364	0.00676943	0.00790099	0.0052956	0.00628155	0.00199451
PE 37:2/PE O-38:2/PE P-38:1	0.0212941	0.0119198	0.018819	0.00605742	0.0191942	0.0154569	0.0063286	0.016541	0.0187344	0.0168942	0.0160416	0.0113925	0.0159208	0.00272802
PE 37:3/PE O-38:3/PE P-38:2	0.00859921	0.00509476	0.00738419	0.00523235	0.00671249	0.0066046	0.00147991	0.00952166	0.00860641	0.00551254	0.0123541	0.00495943	0.00819082	0.00303692
PE 37:4/PE O-38:4/PE P-38:3	0.0743222	0.052547	0.0760731	0.0436443	0.0782351	0.0649643	0.0157783	0.0730236	0.0739954	0.0620812	0.0633859	0.049006	0.0642984	0.0101213
PE 37:5/PE O-38:5/PE P-38:4	0.0175333	0.0165387	0.0197335	0.0131593	0.0163833	0.0166696	0.00237462	0.0152571	0.0171419	0.0156917	0.0229693	0.0117775	0.0165675	0.00408477
PE 37:6/PE O-38:6/PE P-38:5	0.0140612	0.010498	0.0154501	0.00808399	0.013182	0.0122551	0.00295022	0.0112435	0.0142326	0.0142221	0.0160658	0.00849587	0.012852	0.00298642
PE 38:1/PE 39:8/PE O-40:8/PE P-40:7	0.0137648	0.00998096	0.0129051	0.00894199	0.0144344	0.0120054	0.00241287	0.0123211	0.0142487	0.0151675	0.0159556	0.00843575	0.0132257	0.00300131
PE 38:2	0.0575765	0.0284939	0.0421461	0.0270284	0.0492643	0.0409018	0.0131904	0.0527511	0.0551831	0.0488791	0.0369062	0.0391214	0.0465682	0.00816381
PE 38:3	0.14677	0.0999412	0.102646	0.0740591	0.157231	0.11613	0.0347923	0.115852	0.152821	0.175293	0.184219	0.107987	0.147235	0.0343205
PE 38:4	4.07782	2.8115	3.46731	3.37259	3.86012	3.51787	0.488184	3.59819	3.24594	3.28154	2.90516	2.57863	3.12189	0.390463
PE 38:5	1.1054	0.619946	1.03054	0.945185	1.00026	0.940268	0.188181	1.08814	1.00953	1.07471	1.14636	0.760771	1.0159	0.150689
PE 38:6	3.00938	2.04799	2.46022	2.25335	2.90956	2.5361	0.414554	2.83077	2.89402	2.89443	2.60769	2.04985	2.65535	0.3584
PE 38:7/PE 37:0/PE O-38:0	0.071373	0.0527968	0.0947987	0.0526874	0.0662944	0.0675901	0.0173005	0.071284	0.0958273	0.0813307	0.0851239	0.05365	0.0774432	0.0159384
PE 39:5/PE O-40:5/PE P-40:4	0.0141326	0.0162484	0.0144554	0.00983632	0.0143848	0.0138115	0.00237628	0.0123216	0.0134913	0.0123327	0.0199758	0.00925981	0.0134763	0.00395804
PE 39:6/PE O-40:6/PE P-40:5	0.0413379	0.0227088	0.0322256	0.0219258	0.0363052	0.0309007	0.00847872	0.0361292	0.0354556	0.031679	0.0333558	0.0265926	0.0326424	0.0038115
PE 40:3	0.00949029	0.00458721	0.00684508	0.00411416	0.00715408	0.00643816	0.00216913	0.00939133	0.0126176	0.00958086	0.00818109	0.00435563	0.0088253	0.00298604
PE 40:4	0.0764654	0.055308	0.0893305	0.0638023	0.0852626	0.0740338	0.0143294	0.0747571	0.0815288	0.0764666	0.0732683	0.0668191	0.074568	0.00533452
PE 40:5	0.149975	0.0777069	0.112894	0.130388	0.0977327	0.113739	0.0280424	0.126197	0.122116	0.11779	0.0963196	0.0947634	0.111437	0.0148224
PE 40:6	1.12869	0.433506	0.692653	0.591171	0.914794	0.752163	0.273506	0.768924	0.715555	0.756828	0.547239	0.565979	0.670905	0.106404
PE 40:7	0.45571	0.200723	0.382429	0.295588	0.383587	0.343608	0.0979723	0.376342	0.346738	0.354608	0.325965	0.299112	0.340553	0.029355
PE 40:8	0.0400308	0.0321862	0.0441392	0.0271707	0.0416389	0.0370332	0.00709674	0.0360243	0.0355545	0.0384275	0.0297044	0.0382213	0.0355864	0.00352866
PE 41:0/PE 42:7	0.0170613	0.00667325	0.0119444	0.0108801	0.0131826	0.0119483	0.00376275	0.0120011	0.0147204	0.0152459	0.0129872	0.0126911	0.0135291	0.00138719
PE 41:1/PE 42:8/PE O-42:1/PE P-42:0	0.009073	0.00483864	0.00713683	0.00556327	0.00659366	0.00664108	0.00162578	0.00659621	0.0068018	0.00564003	0.0079608	0.00654876	0.00670952	0.000830167
PE 41:6/PE O-42:6/PE P-42:5	0.0191071	0.010605	0.0141532	0.0107197	0.0176347	0.0144439	0.00389288	0.0182895	0.0164968	0.0152678	0.0130018	0.0134613	0.0153035	0.00218133
PE 42:4	0.00285872	0.00317714	0.00159578	0.00225789	0.00334849	0.0026476	0.000720144	0.00349085	0.00323333	0.00255255	0.00321928	0.00223613	0.00294643	0.000527451
PE 42:5	0.00564228	0.00448059	0.00571728	0.00534009	0.00679514	0.00559507	0.000831327	0.00781991	0.00643251	0.00616711	0.00677393	0.00335526	0.00610974	0.00166286
PE 42:6	0.0188289	0.00772287	0.0147853	0.0074435	0.0166581	0.0130877	0.00522565	0.0167126	0.017683	0.01211	0.0112801	0.014092	0.0143756	0.00279267

## Sheet: PS
PS - Intensity normalised to IS	Control_12mo							Cdk1 cKO__12mo
	Control 1	Control 2	Control 3	Control 4	Control 5	Average	Std. Dev.	KO 1	KO 2	KO 3	KO 4	KO 5	Average	Std. Dev.
PS 28:0 (IS)	1	1	1	1	1	1	0	1	1	1	1	1	1	0
PS 36:0	0.00236055	0.0021505	0.000841891	0.00271499	0.00133	0.00187959	0.000771603	0.00466884	0.00211344	0.000110018	0.00134002	0.00252563	0.00215159	0.00168111
PS 36:1	0.119014	0.143827	0.123302	0.196606	0.0724456	0.131039	0.0450005	0.141198	0.18621	0.224526	0.130797	0.109877	0.158522	0.0462554
PS 36:2	0.130352	0.19443	0.159741	0.226591	0.0789796	0.158018	0.057104	0.165546	0.17646	0.159267	0.100253	0.14089	0.148483	0.0298913
PS 36:3	0.0154323	0.0255009	0.0202685	0.0261728	0.0104913	0.0195732	0.0066859	0.0176727	0.0161865	0.0158976	0.0154069	0.0159657	0.0162259	0.000857456
PS 36:4	0.1623	0.201153	0.178093	0.25972	0.0864823	0.17755	0.062919	0.12207	0.224207	0.168975	0.103394	0.173062	0.158341	0.0474416
PS 38:2	0.0172892	0.0151636	0.0136179	0.0192576	0.00833473	0.0147326	0.00416453	0.0143699	0.0174491	0.0228059	0.0113379	0.0119173	0.015576	0.00470589
PS 38:3	0.117318	0.176837	0.145744	0.152482	0.0665382	0.131784	0.042188	0.146411	0.143278	0.112938	0.103579	0.125211	0.126284	0.0186324
PS 38:4	1.36241	1.44709	1.43492	1.85259	0.75186	1.36977	0.395349	1.19678	1.72168	1.61003	1.07516	1.42266	1.40526	0.271471
PS 38:5	0.0577231	0.0888777	0.0786701	0.115026	0.0398953	0.0760385	0.0288687	0.0638952	0.0801614	0.0708	0.0468498	0.0653179	0.0654049	0.0121803
PS 38:6	0.188756	0.337151	0.278984	0.234097	0.112658	0.230329	0.0856845	0.190755	0.246867	0.23681	0.115194	0.238792	0.205684	0.055164
PS 40:3	0.00742808	0.00822857	0.00825276	0.0104008	0.00410791	0.00768362	0.00228336	0.00516562	0.00887908	0.00662556	0.00724154	0.00590363	0.00676309	0.00141561
PS 40:4	0.0957276	0.118465	0.106824	0.132526	0.0629065	0.10329	0.0263891	0.104933	0.131703	0.172076	0.0858515	0.104124	0.119738	0.0335176
PS 40:5	0.101592	0.143543	0.111762	0.132582	0.060327	0.109961	0.032312	0.138394	0.138948	0.146013	0.0987902	0.107317	0.125893	0.0212788
PS 40:6	0.855442	1.33697	1.14832	0.799077	0.521673	0.932295	0.317289	1.00629	1.03923	1.14871	0.565593	1.1407	0.980104	0.239906
PS 40:7	0.0321143	0.0458942	0.0374426	0.041906	0.0195461	0.0353807	0.0102319	0.0318516	0.0402289	0.0412406	0.0242225	0.0360691	0.0347226	0.00694822
PS 42:4	0.00517042	0.00693382	0.00642667	0.00702352	0.00315177	0.00574124	0.00162539	0.00478597	0.00607067	0.00766659	0.00430894	0.00523198	0.00561283	0.00131875
PS 42:6	0.0142558	0.0294345	0.0204768	0.0144298	0.00900949	0.0175213	0.00779954	0.015511	0.0133486	0.0195091	0.00760324	0.0192992	0.0150542	0.00491174
