# Supplementary material for: Remodeling of whole-body lipid metabolism and a diabetic-like phenotype caused by loss of CDK1 and hepatocyte division
Source: eLife. 2020 Dec 21;9:e63835. doi: 10.7554/eLife.63835 (PMC7771968; doi:10.7554/eLife.63835)
Supplement: Supplementary file 6. [file elife-63835-supp6.xlsx]

## Sheet: Total gene list
EnsemblID	Gene Symbol	log2fc	pval	qval	Control_1	Control_2	Control_3	Cdk1 cKO_1	Cdk1 cKO_2	Cdk1 cKO_3
ENSMUSG00000036469.16	2001-03-01	0.128281	0.699692	0.449414	0.469	0.352	0.743	0.535	1.03	0.352
ENSMUSG00000026621.13	2001-03-01	-0.0602285	0.401708	0.339085	223.824	221.613	202.03	190.903	208.655	203.647
ENSMUSG00000000486.13	2001-09-01	0.210381	0.4024	0.339432	1.128	1.558	0.761	2.229	1.621	1.048
ENSMUSG00000073481.9	2002-03-01	-0.0286869	0.574479	0.405846	464.851	447.36	396.103	389.231	437.089	420
ENSMUSG00000032656.14	2003-03-01	0.556822	0.0115844	0.0573804	1.083	1.228	1.228	2.085	1.519	1.746
ENSMUSG00000020486.18	2004-09-01	0.439106	0.121788	0.188443	12.809	5.28	11.486	13.722	16.567	7.066
ENSMUSG00000039100.10	2006-03-01	0.0430895	0.747127	0.464499	15.606	19.991	21.142	17.897	19.209	20.578
ENSMUSG00000050379.15	2006-09-01	0.126059	0.658292	0.435764	0.646	0.523	0.508	0.877	0.569	0.4
ENSMUSG00000026977.17	2007-03-01	0.0327697	0.891448	0.509384	8.531	11.547	13.515	11.575	12.44	11.142
ENSMUSG00000001833.17	2007-09-01	0.0633088	0.640284	0.429423	27.017	26.488	32.219	31.87	30.152	27.978
ENSMUSG00000025702.15	2008-03-01	0.162065	0.433457	0.352441	29.362	31.506	37.941	36.218	36.722	33.05
ENSMUSG00000018398.18	2008-09-01	0.477217	0.030318	0.096571	1.96	1.187	2.374	2.921	3.09	2.016
ENSMUSG00000040502.5	2009-03-01	0.0971203	0.418593	0.346458	0.228	0.294	0.294	0.304	0.228	0.275
ENSMUSG00000059248.13	2009-09-01	0.17867	0.212651	0.246076	25.38	24.345	25.797	27.897	33.678	27.149
ENSMUSG00000019917.10	2010-09-01	0.0149985	0.944621	0.523816	9.666	10.705	9.958	8.116	11.763	9.484
ENSMUSG00000058013.11	2011-09-01	0.213833	0.415925	0.345366	3.392	4.445	3.101	6.512	4.315	2.88
ENSMUSG00000007777.9	0610009B22Rik	-0.0671274	0.0413329	0.112347	24.363	26.505	26.513	23.335	24.695	24.227
ENSMUSG00000042208.15	0610010F05Rik	0.0255019	0.88335	0.507484	3.779	4.506	5.257	5.306	4.05	4.69
ENSMUSG00000020831.18	0610010K14Rik	0.00714929	0.955682	0.526463	12.198	11.975	9.337	10.322	14.408	11.247
ENSMUSG00000107002.1	0610012G03Rik	0.0397942	0.740163	0.4622	10.593	10.343	8.421	9.874	9.562	10.828
ENSMUSG00000108680.1	0610030E20Rik	0.0537704	0.679708	0.443123	5.124	5.217	5.65	5.774	5.217	5.991
ENSMUSG00000058706.5	0610030E20Rik	0.0537704	0.679708	0.443123	5.124	5.217	5.65	5.774	5.217	5.991
ENSMUSG00000028608.15	0610037L13Rik	-0.097947	0.333471	0.307732	15.23	11.121	12.98	11.636	13.602	12.478
ENSMUSG00000060512.7	0610040J01Rik	0.150893	0.0145026	0.065038	14.16	12.063	13.494	16.052	13.384	14.948
ENSMUSG00000030663.12	1110004F10Rik	0.129243	0.0579615	0.13284	32.341	32.251	31.28	33.234	33.246	33.771
ENSMUSG00000027637.3	1110008F13Rik	-0.0293963	0.763399	0.470268	74.13	74.401	67.982	71.39	63.103	75.551
ENSMUSG00000021023.14	1110008L16Rik	0.134295	0.332255	0.307207	5.301	4.373	3.753	4.543	4.241	5.425
ENSMUSG00000039195.4	1110008P14Rik	-0.0148182	0.936832	0.52216	9.228	12.446	7.472	8.168	10.644	9.865
ENSMUSG00000045237.5	1110012L19Rik	-0.103474	0.32619	0.304205	8.33	9.552	8.013	6.672	8.817	8.291
ENSMUSG00000037971.10	1110032A03Rik	0.0762721	0.256414	0.269538	33.342	30.147	29.373	29.41	33.278	32.716
ENSMUSG00000044991.10	1110034G24Rik	0.228117	0.124446	0.190254	3.092	3.161	3.496	3.014	3.815	4.969
ENSMUSG00000040591.18	1110051M20Rik	0.109468	0.487179	0.373409	1.384	2.045	0.998	1.508	1.57	1.597
ENSMUSG00000035171.9	1110059E24Rik	-0.0833975	0.390651	0.333981	11.446	13.214	11.639	10.13	10.516	12.845
ENSMUSG00000032551.7	1110059G10Rik	-0.0634866	0.628882	0.425509	10.621	12.315	10.888	8.592	9.268	13.103
ENSMUSG00000078570.10	1110065P20Rik	0.013989	0.922329	0.518313	10.833	14.086	9.863	12.322	10.631	13.147
ENSMUSG00000045414.7	1190002N15Rik	-0.190031	0.367525	0.323248	9.161	21.469	14.202	10.965	11.451	10.696
ENSMUSG00000043687.15	1190005I06Rik	0.0130806	0.94533	0.523989	4.263	4.342	2.927	3.67	4.378	3.838
ENSMUSG00000063320.11	1190007I07Rik	-0.116586	0.378831	0.328467	10.632	10.981	8.043	7.119	10.69	10.581
ENSMUSG00000033688.10	1300017J02Rik	-0.147294	0.0639839	0.139753	209.878	184.463	185.393	154.682	180.907	173.415
ENSMUSG00000051319.6	1500011K16Rik	0.0288199	0.888824	0.508702	5.049	3.687	4.468	3.353	6.129	5.329
ENSMUSG00000035595.6	1600002K03Rik	0.0590203	0.736565	0.460911	2.671	3.17	1.969	2.814	2.117	2.726
ENSMUSG00000050088.9	1600012H06Rik	0.157472	0.0440632	0.116014	12.157	13.233	13.402	15.23	14.523	14.389
ENSMUSG00000054676.15	1600014C10Rik	0.0342135	0.666883	0.438776	56.736	64.067	55.639	54.888	63.513	60.338
ENSMUSG00000047150.8	1700001C19Rik	-0.074909	0.595819	0.413737	7.837	7.43	6.146	5.708	8.109	5.844
ENSMUSG00000030030.5	1700003E16Rik	0.250563	0.124546	0.190295	1.275	0.79	1.239	1.257	1.114	1.383
ENSMUSG00000038523.10	1700003F12Rik	-0.049636	0.875936	0.505122	0.176	0.13	0.241	0.13	0.213	0.093
ENSMUSG00000026831.16	1700007K13Rik	-0.115951	0.735523	0.460716	0.192	0.251	0.084	0.151	0.234	0.117
ENSMUSG00000008028.15	1700008O03Rik	0.603552	0.0198937	0.0771094	0.209	0.162	0.232	0.476	0.255	0.371
ENSMUSG00000021850.14	1700011H14Rik	0.377021	0.157833	0.213672	0.623	0.474	0.816	0.676	0.807	0.579
ENSMUSG00000032300.7	1700017B05Rik	-0.906745	0.00273975	0.0249197	3.151	6.42	2.943	1.998	2.568	1.478
ENSMUSG00000043629.12	1700019D03Rik	-0.00845494	0.950933	0.525188	0.338	0.323	0.47	0.323	0.367	0.367
ENSMUSG00000035085.5	1700020L24Rik	0.48833	0.0472929	0.120059	0.242	0.144	0.188	0.224	0.314	0.269
ENSMUSG00000019797.11	1700021F05Rik	0.0163749	0.868296	0.502893	15.664	13.528	13.172	13.925	14.695	14.72
ENSMUSG00000028451.12	1700022I11Rik	0.315236	0.188092	0.232021	0.195	0.264	0.278	0.403	0.25	0.403
ENSMUSG00000032666.16	1700025G04Rik	-0.0749379	0.828167	0.490823	1.099	0.296	1.197	0.901	1.253	0.507
ENSMUSG00000044916.10	1700029I15Rik	0.055351	0.773985	0.473836	1.787	2.176	1.225	1.415	1.655	2.217
ENSMUSG00000071103.9	1700029J07Rik	0.325648	0.0612714	0.136494	0.539	0.319	0.499	0.459	0.419	0.519
ENSMUSG00000031847.8	1700030J22Rik	0.127672	0.403354	0.339839	0.189	0.237	0.201	0.32	0.225	0.225
ENSMUSG00000052794.13	1700030K09Rik	0.214492	0.160752	0.215491	2.004	1.158	1.576	1.858	2.53	1.654
ENSMUSG00000005983.15	1700037C18Rik	0.0881141	0.753333	0.46668	0.369	0.424	0.342	0.252	0.568	0.369
ENSMUSG00000027327.16	1700037H04Rik	0.237997	0.15857	0.214224	3.082	2.959	2.546	2.948	3.763	2.97
ENSMUSG00000094103.2	1700047I17Rik2	0.939296	0.0142766	0.064585	0.32	0.872	0.978	1.21	1.619	0.961
ENSMUSG00000044854.7	1700056E22Rik	-0.129128	0.530888	0.389621	0.484	0.515	0.515	0.303	0.585	0.464
ENSMUSG00000038323.3	1700066M21Rik	-0.0241026	0.850182	0.497676	14.912	16.016	17.646	15.175	17.085	15.158
ENSMUSG00000046408.13	1700067K01Rik	0.452231	0.0866468	0.161342	0.285	0.177	0.231	0.326	0.502	0.448
ENSMUSG00000033029.12	1700088E04Rik	0.237683	0.213581	0.24654	1.182	1.373	0.703	0.959	1.084	1.031
ENSMUSG00000090840.2	1700092M07Rik	-0.0431848	0.924753	0.518945	0.097	0.234	0.429	0.312	0.097	0.546
ENSMUSG00000032611.9	1700102P08Rik	-0.0210565	0.943158	0.523426	0.165	0.306	0.273	0.182	0.149	0.248
ENSMUSG00000008307.11	1700109H08Rik	0.543237	0.333425	0.307732	0.509	0.407	0.483	0.47	0.521	0.458
ENSMUSG00000040822.7	1700123O20Rik	0.153504	0.0180095	0.0733073	19.458	21.288	19.281	20.841	20.456	21.829
ENSMUSG00000071653.9	1810009A15Rik	-0.145601	0.312324	0.297666	8.236	8.285	7.393	7.319	6.809	8.377
ENSMUSG00000109305.1	1810010D01Rik	0.172443	0.55453	0.397943	0.185	0.185	0.24	0.213	0.277	0.12
ENSMUSG00000078607.5	1810010H24Rik	0.178734	0.263163	0.273036	2.39	1.886	2.028	1.938	2.455	2.338
ENSMUSG00000041707.8	1810011H11Rik	-0.0311617	0.94855	0.524683	0.804	0.634	0.77	0.793	1.755	0.362
ENSMUSG00000078784.8	1810022K09Rik	0.0448694	0.694757	0.448036	42.725	38.037	38.968	38.573	45.634	39.622
ENSMUSG00000044145.2	1810024B03Rik	-0.0460588	0.796398	0.481299	0.514	0.569	0.553	0.553	0.427	0.459
ENSMUSG00000044148.6	1810030O07Rik	0.314836	0.0168251	0.0707808	3.611	3.471	3.023	4.017	4.325	3.387
ENSMUSG00000054091.9	1810037I17Rik	0.0312252	0.674726	0.441566	10.771	11.96	9.742	9.337	12.779	10.898
ENSMUSG00000020284.16	1810043G02Rik	0.0142476	0.919384	0.517506	2.212	2.928	2.004	2.253	2.523	1.641
ENSMUSG00000036027.11	1810046K07Rik	-0.0946391	0.7895	0.479034	1.732	0.819	1.165	1.291	2.52	1.417
ENSMUSG00000027713.6	1810062G17Rik	0.343409	0.11955	0.186625	0.462	1.188	0.819	1.083	0.766	1.003
ENSMUSG00000021290.6	2010107E04Rik	0.00960952	0.934478	0.521646	138.772	129.984	117.655	116.212	140.2	126.84
ENSMUSG00000029384.5	2010109A12Rik	-0.0215347	0.922938	0.518523	0.199	0.283	0.178	0.189	0.22	0.388
ENSMUSG00000021458.17	2010111I01Rik	-0.242229	0.00509823	0.0358559	16.055	11.51	15.148	12.069	11.883	11.74
ENSMUSG00000074829.10	2010315B03Rik	0.310673	0.0939503	0.167631	6.068	6.609	8.759	8.466	10.09	8.583
ENSMUSG00000030587.5	2200002D01Rik	-0.132574	0.581143	0.408122	6	10.096	6.176	4.268	8.63	7.204
ENSMUSG00000074217.8	2210011C24Rik	-0.320885	0.387291	0.332369	0.078	0.178	0.128	0.106	0.156	0.056
ENSMUSG00000021550.6	2210016F16Rik	0.00356196	0.974502	0.531056	8.809	7.873	6.798	6.902	8.28	8.549
ENSMUSG00000029559.15	2210016L21Rik	0.194308	0.0430798	0.114752	7.787	7.047	6.882	6.988	8.245	8.468
ENSMUSG00000071252.6	2210408I21Rik	0.138813	0.374153	0.326463	0.618	0.83	1.101	0.937	0.773	0.966
ENSMUSG00000078894.9	2210418O10Rik	2.79973	6.32035e-05	0.0026312	3.868	1.209	4.472	33.72	26.469	26.469
ENSMUSG00000032403.8	2300009A05Rik	-0.021058	0.803668	0.48333	11.159	12.433	11.572	10.324	11.141	12.739
ENSMUSG00000028396.5	2310002L09Rik	-0.844616	0.211593	0.2455	0.111	0.111	0.111	0.111	0.111	0.111
ENSMUSG00000079283.2	2310009B15Rik	-0.0661901	0.612407	0.419496	4.201	4.851	3.358	3.804	3.804	3.835
ENSMUSG00000020133.8	2310011J03Rik	0.0869451	0.48919	0.374169	5.928	4.966	4.749	4.837	5.672	5.575
ENSMUSG00000049643.15	2310022A10Rik	0.181209	0.0676776	0.143357	2.309	2.549	2.802	3.054	3.211	2.622
ENSMUSG00000031983.7	2310022B05Rik	0.476196	0.0157609	0.0682942	5.71	3.651	7.866	7.597	9.055	6.727
ENSMUSG00000032062.2	2310030G06Rik	0.079641	0.237811	0.259739	14.072	12.327	12.028	14.505	14.399	13.445
ENSMUSG00000020441.6	2310033P09Rik	-0.0942171	0.306295	0.294675	4.831	4.919	3.964	4.051	4.688	3.228
ENSMUSG00000026319.13	2310035C23Rik	0.0591158	0.586744	0.410294	6.08	5.608	6.104	5.821	6.789	6.942
ENSMUSG00000015519.12	2310057J18Rik	0.770063	0.092166	0.166224	0.123	0.123	0.082	0.467	0.238	0.115
ENSMUSG00000040177.10	2310057M21Rik	-0.121822	0.461138	0.362857	1.146	1.213	1.347	1.124	0.735	1.124
ENSMUSG00000050705.15	2310061I04Rik	-0.131307	0.328794	0.305508	14.451	12.898	12.291	9.73	13.845	13.648
ENSMUSG00000045411.16	2410002F23Rik	-0.0688992	0.522433	0.386752	5.638	6.883	5.419	5.324	6.56	4.887
ENSMUSG00000036873.13	2410004B18Rik	-0.126159	0.153484	0.210814	5.523	6.485	5.642	5.127	5.434	5.593
ENSMUSG00000039801.7	2410089E03Rik	0.113021	0.654682	0.434545	1.464	1.743	1.699	2.197	2.123	1.142
ENSMUSG00000032840.7	2410131K14Rik	0.325777	0.000387473	0.00779339	1.078	0.852	0.965	1.191	1.191	1.39
ENSMUSG00000071632.10	2510002D24Rik	-0.0400644	0.704214	0.450853	15.745	15.416	13.238	12.637	13.964	14.372
ENSMUSG00000044496.6	2510039O18Rik	0.0770591	0.0695757	0.145255	8.343	9.614	8.068	9.508	9.095	8.587
ENSMUSG00000052419.7	2610001J05Rik	0.134149	0.0839352	0.159209	15.908	14.222	14.411	14.352	16.368	14.646
ENSMUSG00000031242.7	2610002M06Rik	0.149231	0.336678	0.309004	3.521	3.961	4.54	5.442	4.422	4.004
ENSMUSG00000060301.6	2610008E11Rik	0.484348	0.0107948	0.0552308	2.57	2.13	2.807	3.703	3.72	3.838
ENSMUSG00000091474.2	2610021A01Rik	0.172855	0.611104	0.418999	3.003	3.148	5.584	5.005	4.07	4.267
ENSMUSG00000071302.10	2610044O15Rik8	0.582597	0.00108512	0.0143779	4.905	2.671	3.921	6.655	5.53	5.467
ENSMUSG00000059482.15	2610301B20Rik	0.512518	6.91262e-06	0.000693754	2.68	2.693	2.973	4.071	3.752	3.395
ENSMUSG00000010277.7	2610507B11Rik	0.279053	0.0985135	0.171253	59.447	62.056	60.759	62.243	68.789	65.337
ENSMUSG00000028536.12	2610528J11Rik	-0.0511747	0.671662	0.440504	8.882	8.609	9.337	6.505	8.916	9.417
ENSMUSG00000034601.17	2700049A03Rik	0.025758	0.896769	0.511276	0.727	0.818	0.805	0.727	0.96	0.87
ENSMUSG00000053080.10	2700081O15Rik	0.176419	0.415011	0.344996	1.199	0.678	1.772	1.529	1.686	1.321
ENSMUSG00000062198.5	2700097O09Rik	0.154924	0.242204	0.261951	5.881	5.801	5.79	7.377	5.744	5.995
ENSMUSG00000031984.8	2810004N23Rik	-0.0798108	0.219018	0.249956	11.802	11.793	12.35	10.663	9.863	12.35
ENSMUSG00000047635.6	2810006K23Rik	0.02181	0.539858	0.392846	4.612	4.428	4.843	4.795	5.017	4.631
ENSMUSG00000020491.15	2810021J22Rik	0.62265	0.0014371	0.0170598	1.163	0.906	1.077	1.796	2.001	1.676
ENSMUSG00000028060.14	2810403A07Rik	0.109516	0.461362	0.362928	16.462	20.967	21.456	23.953	18.274	22.313
ENSMUSG00000026227.11	2810459M11Rik	-0.0568879	0.552673	0.397296	25.529	27.808	24.159	25.231	21.243	25.299
ENSMUSG00000032712.16	2810474O19Rik	-0.35924	0.0729142	0.148734	4.239	7.189	4.625	4.072	4.306	3.167
ENSMUSG00000051339.10	2900026A02Rik	0.509039	0.0356359	0.104121	19.619	17.701	26.005	34.769	25.851	31.355
ENSMUSG00000079737.4	3110001I22Rik	-0.0581026	0.774555	0.474007	0.758	1.636	1.165	1.377	0.832	1.349
ENSMUSG00000026388.15	3110009E18Rik	-0.147238	0.588888	0.410855	0.433	0.505	0.598	0.425	0.656	0.353
ENSMUSG00000067879.3	3110035E14Rik	0.214322	0.16926	0.220159	0.134	0.257	0.123	0.165	0.216	0.237
ENSMUSG00000025102.14	3110040N11Rik	0.0135717	0.853038	0.498425	13.475	11.726	10.214	10.816	13.926	11.439
ENSMUSG00000028300.14	3110043O21Rik	0.102389	0.658489	0.435837	3.461	7.737	4.933	6.126	3.988	5.728
ENSMUSG00000046806.13	3110062M04Rik	0.162243	0.163182	0.216706	2.292	2.257	2.094	3.084	2.211	2.455
ENSMUSG00000074635.2	3110070M22Rik	0.584559	0.00821803	0.0469707	0.278	0.339	0.253	0.296	0.389	0.426
ENSMUSG00000053553.11	3110082I17Rik	-0.697382	0.0023836	0.0229628	1.734	2.868	1.342	1.091	0.746	1.185
ENSMUSG00000063364.10	3300002I08Rik	0.143856	0.519192	0.385528	0.296	0.24	0.518	0.296	0.601	0.296
ENSMUSG00000071540.4	3425401B19Rik	-0.552161	0.256521	0.26954	0.133	0.133	0.133	0.133	0.133	0.133
ENSMUSG00000031125.2	3830403N18Rik	1.11339	0.0315154	0.0984254	0.093	0.149	0.093	0.13	0.558	0.446
ENSMUSG00000033111.16	3830406C13Rik	0.0925155	0.339626	0.310259	13.501	14.48	14.094	15.197	18.576	16.494
ENSMUSG00000064202.15	4430402I18Rik	0.396797	0.0791416	0.154527	2.052	3.364	2.68	3.087	2.606	3.198
ENSMUSG00000062822.8	4833420G17Rik	0.271232	0.0100729	0.0529491	10.245	11.086	11.036	12.154	11.601	12.995
ENSMUSG00000025871.18	4833439L19Rik	0.20603	0.0860359	0.160632	23.025	24.4	26.03	34.499	26.052	26.251
ENSMUSG00000029828.4	4921507P07Rik	0.184115	0.307123	0.295023	0.245	0.289	0.188	0.317	0.245	0.332
ENSMUSG00000036934.9	4921524J17Rik	-0.0176749	0.893875	0.51025	5.882	7.043	6.114	7.263	5.964	5.024
ENSMUSG00000027309.18	4930402H24Rik	-0.096452	0.628438	0.425341	5.707	6.299	7.187	5.056	7.294	5.233
ENSMUSG00000020234.10	4930404N11Rik	-0.467442	0.25679	0.269647	0.346	0.259	0.593	0.198	0.494	0.198
ENSMUSG00000022993.7	4930415O20Rik	-0.196084	0.466703	0.36516	0.128	0.231	0.384	0.128	0.137	0.128
ENSMUSG00000046567.10	4930430F08Rik	0.0530373	0.762247	0.469902	3.106	3.167	4.955	3.864	3.758	3.803
ENSMUSG00000021747.12	4930452B06Rik	0.25596	0.351102	0.315596	0.158	0.138	0.227	0.118	0.227	0.138
ENSMUSG00000059920.9	4930453N24Rik	0.033203	0.246955	0.264575	8.396	8.968	8.17	8.866	8.162	8.483
ENSMUSG00000031270.1	4930513O06Rik	-0.101098	0.612295	0.419488	0.365	0.411	0.308	0.29	0.337	0.449
ENSMUSG00000074629.2	4930518I15Rik	0.0259573	0.923719	0.518678	0.539	0.47	0.692	0.415	0.456	0.719
ENSMUSG00000072762.9	4930522L14Rik	0.148891	0.543239	0.393959	1.344	1.331	1.488	1.735	2.049	2.179
ENSMUSG00000090394.8	4930523C07Rik	0.758685	0.000582274	0.00996962	2.357	1.763	3.205	4.256	4.324	4.816
ENSMUSG00000035364.1	4930524J08Rik	-0.0761038	0.805443	0.483837	0.168	0.584	0.471	0.168	0.393	0.46
ENSMUSG00000005131.4	4930550C14Rik	0.216404	0.40984	0.342748	0.258	0.172	0.183	0.194	0.377	0.151
ENSMUSG00000027811.9	4930579G24Rik	0.285486	0.10811	0.178528	0.438	0.645	0.511	0.755	0.475	0.536
ENSMUSG00000031938.15	4931406C07Rik	0.505205	0.00062896	0.0104313	113.067	106.964	109.145	150.534	171.797	146.309
ENSMUSG00000066571.13	4931406P16Rik	-0.130506	0.641959	0.429989	2.148	2.212	5.033	2.356	3.046	2.982
ENSMUSG00000022179.5	4931414P19Rik	0.710493	0.00481974	0.0349089	1.89	1.776	1.189	3.637	2.664	3.05
ENSMUSG00000014837.15	4931428F04Rik	0.244382	0.333442	0.307732	1.309	1.338	2.163	1.636	2.305	1.58
ENSMUSG00000037270.18	4932438A13Rik	0.0745899	0.678699	0.442819	12.911	14.709	15.091	13.485	14.671	13.274
ENSMUSG00000090369.3	4933411K16Rik	-0.17687	0.542578	0.393802	0.182	0.273	0.494	0.208	0.312	0.312
ENSMUSG00000020807.14	4933427D14Rik	0.449725	0.000138792	0.00429578	1.083	0.917	0.853	1.248	1.223	1.223
ENSMUSG00000027942.16	4933434E20Rik	0.0769369	0.285972	0.284769	23.106	26.118	26.547	25.521	25.931	24.728
ENSMUSG00000036046.14	5031439G07Rik	0.271862	0.0334517	0.101512	6.181	7.131	7.115	7.454	9.509	7.777
ENSMUSG00000040412.16	5330417C22Rik	0.120414	0.678626	0.442807	0.356	0.52	0.767	0.493	0.616	0.452
ENSMUSG00000072763.2	5430403G16Rik	0.598329	3.45331e-05	0.00186177	0.719	0.565	0.753	0.993	1.027	1.113
ENSMUSG00000025058.4	5430427O19Rik	0.325735	0.257481	0.270036	0.151	0.162	0.173	0.14	0.356	0.151
ENSMUSG00000073755.4	5730409E04Rik	0.565248	0.0076571	0.0450604	2	1.453	2.174	2.497	3.465	3.726
ENSMUSG00000057181.15	5730455P16Rik	-0.419503	0.0429079	0.114512	3.525	5.417	5.583	3.111	3.335	4.604
ENSMUSG00000029089.8	5730480H06Rik	0.308126	0.0248812	0.0868594	4.044	4.832	4.033	5.061	4.604	4.547
ENSMUSG00000073197.9	5730507C01Rik	-0.81891	0.027407	0.0913114	0.281	0.418	0.361	0.153	0.137	0.305
ENSMUSG00000032985.15	5730522E02Rik	-0.0667	0.850143	0.497669	0.594	0.415	0.617	0.166	0.415	0.843
ENSMUSG00000041605.16	5730559C18Rik	0.040883	0.878016	0.505726	0.273	0.175	0.218	0.273	0.197	0.142
ENSMUSG00000070690.7	5830473C10Rik	-0.412221	0.0911252	0.165354	18.346	17.712	18.003	8.576	15.519	16.766
ENSMUSG00000066607.5	6030419C18Rik	1.18047	0.154311	0.211348	0.158	0.121	0.146	0.243	1.855	0.146
ENSMUSG00000022195.7	6030458C11Rik	0.106961	0.434542	0.352853	5.143	5.764	6.191	6.52	5.374	6.495
ENSMUSG00000051361.7	6030498E09Rik	0.0454922	0.928002	0.519817	0.076	0.426	0.173	0.282	0.101	0.325
ENSMUSG00000031824.15	6430548M08Rik	0.820821	0.0308086	0.0973726	1.817	2.057	0.919	5.394	2.481	1.817
ENSMUSG00000074646.10	6430550D23Rik	0.234355	0.231224	0.256381	1.261	0.92	0.801	1.176	1.466	1.841
ENSMUSG00000037977.6	6430571L13Rik	0.0414462	0.846016	0.496232	0.551	0.537	0.579	0.762	0.664	0.565
ENSMUSG00000039620.17	6430573F11Rik	1.28638	6.32667e-06	0.00065859	3.625	4.294	2.621	7.472	10.317	10.261
ENSMUSG00000048489.12	8430408G22Rik	-0.782255	0.0079607	0.0462041	101.111	64.296	122.873	45.532	52.363	55.814
ENSMUSG00000030823.6	9130019O22Rik	0.283077	0.0899428	0.16426	1.061	0.988	0.634	1.459	1.032	1.061
ENSMUSG00000062944.4	9130023H24Rik	0.289422	0.0387803	0.108513	1.054	1.012	0.919	1.42	1.002	1.273
ENSMUSG00000054598.13	9130230L23Rik	-0.398699	0.218219	0.24949	0.162	0.372	0.21	0.115	0.105	0.191
ENSMUSG00000101892.1	9130401M01Rik	0.277473	0.00836206	0.0474618	3.421	3.448	2.984	3.654	4.209	3.92
ENSMUSG00000038768.8	9130409I23Rik	0.664334	0.0240711	0.0852476	14.789	11.105	9.771	11.717	27.478	16.178
ENSMUSG00000053070.5	9230110C19Rik	0.373301	0.132739	0.196396	0.285	0.171	0.242	0.185	0.313	0.299
ENSMUSG00000059939.13	9430015G10Rik	0.170284	0.30691	0.294911	2.769	3.238	3.162	4.327	2.996	2.663
ENSMUSG00000040139.14	9430038I01Rik	0.217666	0.252273	0.267388	5.203	4.515	4.647	4.237	8.473	5.587
ENSMUSG00000036275.13	9530068E07Rik	-0.114007	0.245308	0.263481	54.17	61.306	56.12	52.401	51.831	54.158
ENSMUSG00000036411.10	9530077C05Rik	-0.0233647	0.921136	0.517978	0.219	0.251	0.18	0.142	0.264	0.122
ENSMUSG00000044551.13	9930012K11Rik	0.428665	0.0353596	0.103745	0.286	0.233	0.477	0.455	0.434	0.424
ENSMUSG00000069892.9	9930111J21Rik2	0.265219	0.382716	0.330139	0.375	0.24	0.451	0.421	0.676	0.345
ENSMUSG00000113880.1	A030005L19Rik	0.304194	0.309387	0.296223	0.188	0.188	0.255	0.417	0.43	0.215
ENSMUSG00000079144.7	A130010J15Rik	0.03848	0.812747	0.486042	3.461	5.071	5.14	4.465	3.842	4.223
ENSMUSG00000022347.8	A1bg	0.560913	0.119519	0.186625	0.231	0.401	0.185	0.201	0.239	0.609
ENSMUSG00000038884.14	A230050P20Rik	0.590017	0.00675187	0.0419968	95.304	69.718	85.821	104.498	158.086	106.153
ENSMUSG00000047228.9	A2ml1	0.458788	0.0795075	0.154887	27.444	42.051	23.058	41.775	53.921	24.753
ENSMUSG00000047613.10	A430005L14Rik	0.0794678	0.515673	0.384312	16.451	15.324	14.882	13.525	16.127	18.019
ENSMUSG00000056014.15	A430033K04Rik	0.385592	0.00310059	0.0269277	1.782	1.357	1.754	2.056	2.152	1.973
ENSMUSG00000045838.8	A430105I19Rik	0.291968	0.119094	0.186367	0.551	0.551	0.687	0.812	1.051	0.78
ENSMUSG00000037953.7	A4gnt	1.15514	0.0651018	0.140685	0.128	0.139	0.118	0.15	0.77	0.225
ENSMUSG00000043122.7	A530016L24Rik	-0.91397	0.00768077	0.0451261	0.43	0.131	0.202	0.167	0.193	0.167
ENSMUSG00000089844.7	A530032D15Rik	0.103758	0.791821	0.479818	0.257	0.147	0.281	0.623	0.379	0.195
ENSMUSG00000054293.10	A630033H20Rik	0.126813	0.623385	0.423523	0.238	0.148	0.352	0.216	0.432	0.193
ENSMUSG00000096094.2	A630095N17Rik	0.830355	0.000704873	0.0111969	0.304	0.324	0.202	0.567	0.769	0.587
ENSMUSG00000090551.1	A730015C16Rik	0.0195237	0.948188	0.52456	0.198	0.244	0.326	0.116	0.209	0.407
ENSMUSG00000053588.3	A730061H03Rik	-0.108171	0.872078	0.504086	1.734	2.778	1.01	2.745	2.105	1.061
ENSMUSG00000054057.2	A930004D18Rik	0.487897	0.0643072	0.140088	0.826	0.422	0.791	1.02	0.985	0.967
ENSMUSG00000032671.5	A930018P22Rik	0.532303	0.113357	0.18249	0.355	0.292	0.209	0.355	0.584	0.459
ENSMUSG00000090622.1	A930033H14Rik	0.663387	0.124487	0.190272	0.76	0.529	1.402	1.946	0.887	1.826
ENSMUSG00000073497.6	AA792892	1.45342	0.0221273	0.0816063	0.185	0.222	0.315	0.222	1.185	0.648
ENSMUSG00000042510.7	AA986860	-0.0229283	0.967286	0.529264	0.811	0.828	0.846	1.877	0.274	0.966
ENSMUSG00000029482.4	Aacs	-0.543751	0.0953013	0.168815	59.155	44.384	53.365	26.731	46.393	32.27
ENSMUSG00000027761.4	Aadac	-0.0130321	0.65252	0.433772	397.976	380.389	384.728	376.329	376.515	371.048
ENSMUSG00000057228.6	Aadat	-0.268361	0.0198778	0.0771051	56.385	56.741	57.345	42.2	50.916	53.408
ENSMUSG00000021482.10	Aaed1	0.0153863	0.887813	0.508462	33.212	41.665	36.884	40.592	35.484	35.539
ENSMUSG00000037257.8	Aagab	0.13085	0.172585	0.222115	13.998	11.894	15.793	13.961	16.01	15.883
ENSMUSG00000057230.13	Aak1	0.190559	0.22694	0.254064	0.834	1.028	1.177	1.257	1.097	1.108
ENSMUSG00000035642.16	Aamdc	0.0656105	0.446794	0.357583	16.552	16.317	13.188	15.573	17.061	16.163
ENSMUSG00000006299.13	Aamp	-0.0376679	0.382081	0.3299	71.295	74.16	64.21	67.139	63.56	66.204
ENSMUSG00000027628.10	Aar2	0.080471	0.16426	0.217421	7.272	6.78	6.194	7.139	6.856	6.78
ENSMUSG00000068522.4	Aard	0.187744	0.336561	0.30894	0.952	0.502	0.747	0.973	0.686	0.717
ENSMUSG00000031960.14	Aars	-0.0649832	0.525056	0.387622	39.026	45.853	38.853	42.675	33.171	43.734
ENSMUSG00000075528.13	Aarsd1	-0.0405237	0.628181	0.42524	12.057	9.953	8.787	9.788	10.332	10.584
ENSMUSG00000055923.16	Aasdh	0.116239	0.329023	0.305634	6.738	4.958	5.265	5.064	6.356	7.087
ENSMUSG00000025894.11	Aasdhppt	-0.107356	0.0152318	0.0671226	12.321	12.569	12.108	11.134	10.938	11.1
ENSMUSG00000029695.13	Aass	-0.17005	0.227719	0.254558	94.26	100.402	101.298	76.541	80.741	104.022
ENSMUSG00000018697.14	Aatf	0.319173	0.044787	0.116993	6.403	4.841	6.612	7.205	8.226	7.955
ENSMUSG00000025375.15	Aatk	0.496209	0.167426	0.219184	3.388	1.547	2.271	4.174	2.074	4.861
ENSMUSG00000057191.13	AB124611	0.0282915	0.927801	0.519792	1.319	0.99	1.722	1.102	2.478	1.062
ENSMUSG00000057880.12	Abat	-0.0295198	0.827764	0.490733	97.331	91.042	119.767	88.755	116.128	106.513
ENSMUSG00000015243.4	Abca1	-0.0703506	0.677901	0.442599	13.855	17.298	18.458	16.293	13.394	16.08
ENSMUSG00000026944.18	Abca2	0.0668116	0.714132	0.45397	17.834	23.2	22.431	21.484	21.346	26.139
ENSMUSG00000018800.14	Abca5	0.313041	0.113484	0.182513	0.921	0.963	1.201	1.48	1.215	1.117
ENSMUSG00000044749.13	Abca6	0.0567685	0.679073	0.442959	14.655	16.918	20.932	21.821	17.403	18.629
ENSMUSG00000035722.15	Abca7	0.148764	0.214043	0.246832	1.659	1.607	2.051	2.051	2.247	1.972
ENSMUSG00000041828.15	Abca8a	-0.241758	0.221727	0.251494	45.783	34.971	38.568	37.021	25.899	33.675
ENSMUSG00000020620.14	Abca8b	0.095205	0.516292	0.384548	10.974	12.216	12.98	14.536	12.503	10.919
ENSMUSG00000041797.7	Abca9	0.243382	0.268017	0.275713	0.756	0.652	0.83	0.993	1.156	0.667
ENSMUSG00000031974.8	Abcb10	-0.23274	0.0497159	0.123221	10.416	11.956	11.981	8.8	9.557	10.984
ENSMUSG00000027048.15	Abcb11	-0.238102	0.0254315	0.0878865	206.014	221.248	178.775	149.659	162.301	180.832
ENSMUSG00000040584.8	Abcb1a	0.380087	0.216577	0.2483	1.175	2.329	1.587	1.608	2.659	1.154
ENSMUSG00000028970.9	Abcb1b	1.41196	0.0199703	0.0771925	0.882	1.6	0.286	0.765	3.328	0.835
ENSMUSG00000042476.12	Abcb4	0.142452	0.0428639	0.114455	45.616	44.369	44.607	60.056	51.713	48.773
ENSMUSG00000026198.15	Abcb6	0.0865122	0.507383	0.38106	23.009	21.413	15.286	20.171	21.848	20.212
ENSMUSG00000031333.7	Abcb7	0.0928276	0.500223	0.378222	7.032	8.129	8.841	8.321	8.909	8.412
ENSMUSG00000028973.18	Abcb8	0.0763985	0.562435	0.400998	12.721	12.312	10.135	10.452	13.98	12.579
ENSMUSG00000029408.13	Abcb9	0.475194	0.0055718	0.0376958	0.714	1.118	1.01	1.064	1.36	1.441
ENSMUSG00000032842.13	Abcc10	-0.00322514	0.97517	0.531139	2.362	3.278	2.728	2.48	3.224	2.577
ENSMUSG00000036872.16	Abcc12	1.62315	0.0899133	0.164252	0.233	0.301	0.178	0.52	4.021	0.191
ENSMUSG00000025194.5	Abcc2	0.403973	0.0110276	0.0559146	131.948	153.802	141.682	194.305	198.781	163.341
ENSMUSG00000020865.16	Abcc3	0.242391	0.0806718	0.156144	79.754	78.927	62.269	72.949	101.902	79.225
ENSMUSG00000032849.14	Abcc4	2.25087	0.037115	0.106455	0.625	0.761	0.898	2.479	25.788	1.269
ENSMUSG00000030834.7	Abcc6	-0.0620997	0.624578	0.424004	68.095	57.643	55.68	50.421	55.841	58.511
ENSMUSG00000030249.15	Abcc9	0.269913	0.359177	0.319061	4.032	2.299	4.478	5.954	5.422	2.625
ENSMUSG00000031378.14	Abcd1	0.107218	0.422363	0.347987	6.888	7.41	7.231	6.559	10.401	7.3
ENSMUSG00000028127.10	Abcd3	-0.00259216	0.981663	0.532763	214.756	180.373	214.085	178.083	201.021	221.044
ENSMUSG00000021240.6	Abcd4	0.267063	0.0462018	0.118644	6.024	4.39	6.054	6.666	4.812	7.418
ENSMUSG00000058355.8	Abce1	-0.0398518	0.796252	0.481281	21.645	27.741	31.215	26.518	23.817	27.575
ENSMUSG00000038762.15	Abcf1	-0.00662862	0.926716	0.519466	18.934	22.224	18.024	20.043	17.186	20.998
ENSMUSG00000028953.10	Abcf2	0.0875294	0.211059	0.245338	13.92	14.306	14.843	15.193	13.347	16.6
ENSMUSG00000029802.13	Abcg2	0.314515	0.0297013	0.0955083	46.425	41.717	36.954	45.486	63.455	47.43
ENSMUSG00000029299.14	Abcg3	0.0477265	0.916998	0.516835	0.973	0.527	2.121	0.891	2.696	0.645
ENSMUSG00000040505.13	Abcg5	0.299346	0.165828	0.218191	42.635	49.012	44.986	54.138	56.764	48.512
ENSMUSG00000024254.15	Abcg8	0.174995	0.389119	0.333137	34.605	35.842	37.246	43.41	42.459	33.772
ENSMUSG00000040532.14	Abhd11	-0.0278593	0.806615	0.484165	20.918	21.93	18.676	16.646	21.231	20.408
ENSMUSG00000032046.15	Abhd12	0.0391533	0.786215	0.477866	15.664	12.968	14.207	12.291	18.961	13.34
ENSMUSG00000040396.12	Abhd13	0.0104972	0.945801	0.524083	3.799	4.791	4.969	5.346	3.769	4.602
ENSMUSG00000042210.17	Abhd14a	-0.188317	0.16007	0.215064	7.341	5.958	5.86	4.946	5.818	5.761
ENSMUSG00000042073.15	Abhd14b	-0.021348	0.808267	0.484733	146.516	139.487	115.559	119.554	126.184	130.904
ENSMUSG00000000686.11	Abhd15	0.418086	0.00199115	0.0206396	7.838	8.739	8.091	10.193	12.468	12.5
ENSMUSG00000007036.15	Abhd16a	-0.0192345	0.789912	0.479136	20.416	18.619	22.492	17.927	21.821	20.716
ENSMUSG00000003346.14	Abhd17a	-0.0667113	0.632191	0.426626	19.651	20.366	14.269	16.673	19.658	18.396
ENSMUSG00000038459.10	Abhd17c	-0.113199	0.344872	0.312697	30.625	36.809	28.868	26.677	29.507	30.009
ENSMUSG00000037818.16	Abhd18	-0.0217985	0.890109	0.50914	4.161	3.742	5.382	4.492	4.897	4.529
ENSMUSG00000039202.12	Abhd2	0.413525	0.0372792	0.106572	11.494	12.889	15.109	18.115	16.382	16.747
ENSMUSG00000040997.13	Abhd4	0.34258	0.0789395	0.15441	17.987	20.287	19.275	19.535	32.298	20.548
ENSMUSG00000032540.16	Abhd5	-0.199098	0.134157	0.197317	12.221	18.956	16.059	11.674	11.778	15.678
ENSMUSG00000025277.14	Abhd6	0.205262	0.21843	0.249532	14.908	12.962	14.931	16.994	17.205	18.635
ENSMUSG00000007950.9	Abhd8	0.0710543	0.431857	0.351851	1.864	1.632	1.581	2.027	1.684	1.735
ENSMUSG00000058835.14	Abi1	0.174253	0.357233	0.31812	18.344	20.4	23.78	24.352	26.426	21.92
ENSMUSG00000026782.15	Abi2	0.157332	0.507525	0.381112	0.563	0.59	0.684	1.086	0.804	0.603
ENSMUSG00000018381.15	Abi3	0.164677	0.652585	0.433772	2.325	1.276	3.792	2.445	4.675	1.324
ENSMUSG00000026842.16	Abl1	0.368797	0.0293757	0.0949919	4.68	4.791	6.425	6.37	7.725	6.667
ENSMUSG00000026596.13	Abl2	0.0307369	0.799045	0.481942	0.733	0.913	1.01	0.913	0.974	0.769
ENSMUSG00000025085.16	Ablim1	-0.425	0.0445562	0.116663	6.466	7.713	8.201	5.118	7.255	5.577
ENSMUSG00000029095.17	Ablim2	0.0976106	0.6952	0.448132	2.167	1.245	1.275	1.206	2.216	1.02
ENSMUSG00000017631.18	Abr	0.696367	0.0807724	0.156223	1.451	1.123	1.888	2.621	4.197	1.326
ENSMUSG00000078453.3	Abracl	0.161451	0.259244	0.270832	12.031	12.798	12.597	10.271	16.836	11.063
ENSMUSG00000035234.18	Abraxas1	0.337209	0.00642008	0.0408994	5.064	4.952	6.463	6.435	7.512	6.225
ENSMUSG00000030965.19	Abraxas2	0.158081	0.277425	0.2802	13.261	13.698	13.625	15.563	14.252	14.806
ENSMUSG00000036376.3	Abt1	-0.0136562	0.832004	0.492055	2.064	1.96	1.669	1.885	1.55	1.96
ENSMUSG00000030083.11	Abtb1	0.0376409	0.659006	0.43598	12.514	13.005	10.902	11.66	12.61	12.205
ENSMUSG00000032724.5	Abtb2	-1.057	0.000867761	0.0126263	4.85	8.479	6.345	2.454	4.097	2.556
ENSMUSG00000110040.1	AC034099.1	0.528311	0.69689	0.448645	223.402	221.613	664.639	714.13	486.157	311.053
ENSMUSG00000113149.1	AC099934.3	0.526305	0.0222796	0.081818	1.747	2.941	2.456	3.079	2.802	2.629
ENSMUSG00000113786.1	AC099934.5	0.289396	0.0765291	0.15238	1.025	0.955	1.638	1.533	1.787	1.323
ENSMUSG00000097733.7	AC109138.6	0.111458	0.735817	0.460761	0.126	0.217	0.14	0.105	0.189	0.119
ENSMUSG00000106923.3	AC121905.1	0.506597	0.145134	0.204884	0.279	0.194	0.279	0.254	0.545	0.182
ENSMUSG00000113255.1	AC123954.1	0.0622691	0.709001	0.452482	0.247	0.247	0.178	0.227	0.218	0.188
ENSMUSG00000114046.1	AC124712.1	0.480522	0.506645	0.380827	0.321	2.919	2.534	2.502	1.668	4.041
ENSMUSG00000079192.2	AC125149.1	0.870358	0.208881	0.244212	0.196	0.196	2.528	0.706	1.098	0.666
ENSMUSG00000079800.2	AC125149.3	0.403066	0.150481	0.208691	0.196	0.17	0.131	0.209	0.262	0.183
ENSMUSG00000106722.3	AC127556.1	0.106859	0.446852	0.357589	23.23	32.353	25.342	33.706	26.625	25.894
ENSMUSG00000079222.2	AC132444.1	0.26259	0.435271	0.353213	0.148	0.114	0.261	0.443	0.205	0.182
ENSMUSG00000079190.3	AC133103.1	0.0856937	0.766164	0.471245	0.179	0.224	0.314	0.224	0.419	0.344
ENSMUSG00000095672.1	AC133103.5	-0.607559	0.0518713	0.125823	0.069	0.069	0.144	0.069	0.069	0.069
ENSMUSG00000113475.1	AC133183.1	-0.570824	0.24393	0.262888	0.181	0.454	0.599	0.181	0.181	0.181
ENSMUSG00000114763.1	AC134869.3	-0.289513	0.45308	0.359755	0.146	0.146	0.146	0.146	0.146	0.292
ENSMUSG00000095041.7	AC149090.1	0.242798	0.0162335	0.0693507	87.732	92.783	94.539	107.319	116.322	96.618
ENSMUSG00000108815.1	AC149222.1	0.516434	0.247059	0.264628	1.103	0.251	1.378	1.027	1.178	0.727
ENSMUSG00000114004.1	AC155937.1	0.40133	0.354381	0.316976	0.139	0.431	0.139	0.292	0.306	0.459
ENSMUSG00000112160.1	AC158605.2	0.0664618	0.730164	0.45894	0.682	0.728	0.853	0.773	0.648	0.966
ENSMUSG00000115463.1	AC158777.2	-1.23117	0.0195969	0.0765961	0.268	0.287	0.554	0.363	0.096	0.096
ENSMUSG00000114432.1	AC160962.1	0.777598	0.0167507	0.0706172	0.936	2.068	2.079	2.715	4.933	1.895
ENSMUSG00000111206.1	AC162446.4	-0.279294	0.168719	0.219948	1.308	0.899	2.48	1.036	1.363	1.09
ENSMUSG00000111184.1	AC163703.1	-0.451705	0.415284	0.345078	0.587	0.052	0.052	0.21	0.052	0.052
ENSMUSG00000095505.1	AC164084.1	0.386908	0.228754	0.254931	0.172	0.218	0.115	0.126	0.322	0.207
ENSMUSG00000107138.3	AC168054.2	0.424497	0.0739638	0.149755	1.355	1.022	1.459	1.397	2.439	1.574
ENSMUSG00000079808.3	AC168977.1	0.133406	0.504594	0.379973	0.285	0.24	0.285	0.3	0.27	0.405
ENSMUSG00000094915.1	AC168977.2	1.24649	0.0952701	0.168791	1.963	0.701	3.856	2.664	5.398	7.501
ENSMUSG00000107275.3	AC170751.4	0.327857	0.08572	0.160481	5.084	5.624	6.179	9.005	7.085	6.787
ENSMUSG00000115232.1	AC174678.2	0.0559272	0.934055	0.521548	0.393	0.068	0.575	0.379	0.305	0.907
ENSMUSG00000111385.1	AC175315.1	0.52525	0.0126311	0.0602222	2.387	1.721	1.786	2.874	3.881	2.419
ENSMUSG00000114470.1	AC175538.2	0.690232	0.0137082	0.0631975	1.242	1.544	1.023	1.763	2.458	1.724
ENSMUSG00000036138.16	Acaa1a	0.135047	0.259938	0.271181	87.164	73.766	59.504	73.998	86.379	82.704
ENSMUSG00000010651.4	Acaa1b	0.330336	0.121366	0.188179	804.763	575.383	513.978	614.553	926.876	795.925
ENSMUSG00000020532.18	Acaca	0.217396	0.148285	0.206871	12.519	11.147	17.609	12.979	17.072	15.196
ENSMUSG00000042010.16	Acacb	-0.112139	0.7688	0.472183	19.035	18.446	24.594	7.908	22.825	24.672
ENSMUSG00000029456.12	Acad10	0.0563115	0.686256	0.445241	10.809	8.827	9.824	8.727	12.293	9.602
ENSMUSG00000090150.10	Acad11	0.203752	0.0760933	0.152044	127.69	128.355	152.54	162.315	153.264	151.595
ENSMUSG00000042647.13	Acad12	0.326964	0.218743	0.249745	2.616	2.481	2.044	2.004	4.891	2.33
ENSMUSG00000031969.16	Acad8	-0.0366431	0.439522	0.354821	34.068	31.496	35.017	32.42	31.721	32.707
ENSMUSG00000027710.14	Acad9	0.354818	0.0395934	0.109924	30.213	29.868	30.276	30.558	44.026	40.153
ENSMUSG00000026003.5	Acadl	0.110695	0.0472067	0.120022	118.843	105.432	108.057	119.752	113.305	125.29
ENSMUSG00000062908.12	Acadm	0.120332	0.314976	0.298971	233.634	192.581	310.062	274.225	270.445	282.571
ENSMUSG00000029545.13	Acads	0.0359577	0.792473	0.480034	69.703	63.241	60.236	59.99	74.767	70.498
ENSMUSG00000030861.15	Acadsb	-0.0897222	0.656624	0.435133	114.737	112.953	175.074	133.844	122.198	135.206
ENSMUSG00000018574.14	Acadvl	-0.0887809	0.306648	0.294846	157.859	142.563	138.603	129.094	137.574	149.132
ENSMUSG00000001588.12	Acap1	0.291413	0.210535	0.245048	1.858	1.425	1.635	2.317	2.639	1.152
ENSMUSG00000029033.16	Acap3	0.200358	0.0876753	0.162093	1.879	1.866	1.905	2.403	2.096	2.723
ENSMUSG00000032047.5	Acat1	0.0923807	0.280144	0.281674	188.56	146.784	161.968	151.478	176.217	177.187
ENSMUSG00000026499.5	Acbd3	0.106911	0.549348	0.396187	6.364	9.331	8.371	9.38	8.617	7.362
ENSMUSG00000056938.16	Acbd4	-0.0885146	0.520744	0.38618	62.808	54.4	45.273	45.393	59.732	48.299
ENSMUSG00000033701.13	Acbd6	-0.0589245	0.64921	0.432532	15.619	14.219	13.305	13.157	13.875	15.444
ENSMUSG00000040272.14	Accs	0.0505213	0.810782	0.485422	1.627	1.756	2.433	1.563	2.658	2.69
ENSMUSG00000038000.10	Acd	-0.0401469	0.66193	0.436994	7.082	7.288	7.277	6.489	6.683	7.352
ENSMUSG00000020681.14	Ace	0.446906	0.0943693	0.167931	0.691	0.397	0.47	0.882	1.058	0.588
ENSMUSG00000015405.15	Ace2	-0.237643	0.295451	0.289495	0.32	0.253	0.226	0.24	0.266	0.173
ENSMUSG00000038007.14	Acer2	0.0919201	0.658311	0.435764	4.511	2.413	5.286	5.306	4.443	4.668
ENSMUSG00000030760.14	Acer3	-0.0628534	0.570612	0.404206	4.55	5.789	5.31	4.398	5.029	5.485
ENSMUSG00000023328.14	Ache	0.186799	0.349822	0.314916	0.505	0.491	0.546	0.655	0.546	0.451
ENSMUSG00000022185.19	Acin1	0.0962065	0.420607	0.347207	30.111	29.959	36.849	33.397	36.862	30.91
ENSMUSG00000037872.5	Ackr1	0.759572	0.111234	0.1807	0.988	0.169	1.248	0.884	1.866	0.871
ENSMUSG00000044534.8	Ackr2	-0.11327	0.450856	0.359084	0.862	0.578	1.213	0.76	0.839	0.703
ENSMUSG00000044337.5	Ackr3	0.361642	0.343489	0.311934	0.322	0.251	0.418	0.597	0.764	0.346
ENSMUSG00000079355.5	Ackr4	0.0959278	0.607435	0.417889	0.708	0.605	0.812	0.944	1.063	0.649
ENSMUSG00000020917.17	Acly	0.000679599	0.997912	0.536833	201.381	111.799	263.09	126.399	219.811	195.724
ENSMUSG00000026348.7	Acmsd	0.0362384	0.868318	0.502893	9.264	9.035	8.374	9.925	8.941	9.076
ENSMUSG00000070985.3	Acnat1	-0.0854586	0.696876	0.448645	10.368	9.55	21.864	14.768	11.482	14.634
ENSMUSG00000060317.9	Acnat2	0.560852	0.0584625	0.133317	22.876	28.27	36.111	45.872	36.3	41.385
ENSMUSG00000028405.9	Aco1	0.0428948	0.530091	0.389318	79.124	68.012	77.726	73.503	74.411	82.021
ENSMUSG00000022126.6	Acod1	0.532339	0.0876964	0.162093	0.154	0.237	0.14	0.195	0.363	0.181
ENSMUSG00000072949.6	Acot1	0.12556	0.715774	0.454621	32.874	11.398	20.184	24.749	13.473	34.277
ENSMUSG00000034853.16	Acot11	0.676897	0.0813764	0.156825	1.867	1.867	2.98	1.599	5.346	3.53
ENSMUSG00000021620.4	Acot12	-0.0503868	0.585544	0.409754	44.582	40.969	49.399	40.734	40.393	46.886
ENSMUSG00000006717.7	Acot13	0.0170935	0.893681	0.510212	53.238	53.134	45.052	43.066	56.713	52.193
ENSMUSG00000021226.7	Acot2	0.476983	0.0189912	0.0753211	2.696	1.954	2.052	2.872	3.204	3.38
ENSMUSG00000021228.15	Acot3	1.29592	0.000416696	0.00816729	3.639	2.307	4.852	8.871	9.037	8.942
ENSMUSG00000052392.5	Acot4	0.727046	0.00012992	0.00415452	8.071	7.489	11.833	13.776	14.801	16.443
ENSMUSG00000043487.4	Acot6	0.846803	0.00522953	0.0363694	0.366	0.537	0.464	0.513	0.88	1.185
ENSMUSG00000028937.14	Acot7	0.0415021	0.463464	0.363809	11.702	12.021	10.534	12.042	11.352	11.468
ENSMUSG00000025287.15	Acot9	0.461541	0.0797107	0.155112	2.387	2.283	2.619	3.233	5.377	2.561
ENSMUSG00000020777.16	Acox1	0.00997569	0.936499	0.522077	631.084	747.522	592.689	571.544	682.766	684.62
ENSMUSG00000021751.13	Acox2	0.15877	0.0919175	0.166024	126.368	100.039	109.503	112.744	125.499	141.868
ENSMUSG00000044573.16	Acp1	0.0732084	0.0469544	0.119712	28.918	30.205	27.858	29.87	28.799	30.908
ENSMUSG00000002103.15	Acp2	0.0819759	0.417621	0.346077	12.55	11.823	14.52	12.597	16.538	13.688
ENSMUSG00000001348.15	Acp5	-0.00617456	0.961133	0.527665	66.401	61.457	61.568	55.402	78.586	60.876
ENSMUSG00000028093.15	Acp6	-0.0862359	0.283741	0.283499	27.357	29.462	26.149	24.778	26.622	27.83
ENSMUSG00000032561.15	Acpp	-0.663968	0.238161	0.259848	1.154	3.676	1.509	0.317	1.42	2.257
ENSMUSG00000072770.9	Acrbp	-0.0252245	0.826423	0.490394	3.388	3.652	3.545	3.232	3.144	3.594
ENSMUSG00000032281.11	Acsbg1	0.554658	0.00898335	0.0495631	0.169	0.124	0.158	0.316	0.271	0.203
ENSMUSG00000076435.3	Acsf2	0.142222	0.349465	0.314732	82.234	82.542	91.618	92.461	110.126	89.463
ENSMUSG00000015016.8	Acsf3	0.0725151	0.514407	0.38383	14.339	13.132	11.294	11.732	13.89	14.51
ENSMUSG00000018796.13	Acsl1	-0.512245	0.00337631	0.0281524	266.233	272.775	307.382	196.275	171.685	233.313
ENSMUSG00000032883.15	Acsl3	0.530481	0.0336638	0.101686	19.013	22.876	21.772	37.659	25.129	24.738
ENSMUSG00000031278.12	Acsl4	0.316886	0.222306	0.251724	11.515	12.287	16.908	24.116	13.042	14.568
ENSMUSG00000024981.6	Acsl5	0.156997	0.116681	0.184868	381.835	322.932	328.216	308.492	386.405	386.405
ENSMUSG00000020333.17	Acsl6	-0.827918	0.00608647	0.0396387	0.341	0.603	0.214	0.156	0.117	0.136
ENSMUSG00000033533.14	Acsm1	0.014918	0.78745	0.478389	153.576	146.347	144.267	141.323	154.451	152.128
ENSMUSG00000030945.17	Acsm2	0.119099	0.647261	0.431808	0.216	0.306	0.431	0.282	0.467	0.515
ENSMUSG00000030935.15	Acsm3	0.222569	0.125013	0.190595	49.226	46.973	68.182	57.639	67.071	61.622
ENSMUSG00000030972.6	Acsm5	-0.127609	0.195157	0.236088	50.609	42.268	57.021	38.706	49.921	52.5
ENSMUSG00000027452.11	Acss1	0.170505	0.581646	0.408294	0.269	0.154	0.32	0.333	0.435	0.256
ENSMUSG00000027605.18	Acss2	0.0828739	0.667603	0.439025	144.296	120.343	121.587	94.845	148.653	153.056
ENSMUSG00000035948.13	Acss3	0.554502	0.0117083	0.057673	6.765	6.561	7.877	9.212	13.141	13.123
ENSMUSG00000031972.5	Acta1	-1.3221	0.455468	0.360765	0.252	0.302	0.252	0.83	0.403	0.428
ENSMUSG00000029580.14	Actb	-0.0558807	0.7081	0.452136	244.769	208.875	206.935	206.457	284.377	204.475
ENSMUSG00000068614.7	Actc1	-0.49654	0.209642	0.244515	0.266	0.166	0.25	0.166	0.233	0.283
ENSMUSG00000062825.15	Actg1	0.19197	0.254657	0.268649	72.526	85.28	70.276	74.285	114.594	84.012
ENSMUSG00000059430.14	Actg2	-0.442262	0.284184	0.283677	0.618	0.352	0.89	0.501	0.241	0.303
ENSMUSG00000027671.14	Actl6a	0.0273227	0.807186	0.484329	11.814	14.017	14.505	12.552	14.219	14.172
ENSMUSG00000015143.15	Actn1	0.154728	0.465744	0.364806	10.112	10.263	15.309	15.422	15.8	10.112
ENSMUSG00000054808.15	Actn4	0.0125778	0.886218	0.508101	62.938	62.35	83.087	77.841	79.776	67.086
ENSMUSG00000021076.6	Actr10	0.0428866	0.273318	0.278097	45.377	45.358	48.301	48.762	48.772	46.123
ENSMUSG00000037351.9	Actr1b	0.0834651	0.289483	0.286472	25.819	28.712	28.058	31.34	28.222	28.297
ENSMUSG00000020152.7	Actr2	0.185893	0.233276	0.257579	32.79	35.865	40.244	41.505	45.317	36.248
ENSMUSG00000026341.16	Actr3	0.114399	0.497357	0.377309	39.572	40.304	48.01	45.342	54.574	39.621
ENSMUSG00000056367.14	Actr3b	0.114979	0.656684	0.435146	0.369	0.197	0.381	0.307	0.442	0.233
ENSMUSG00000037761.16	Actr5	-0.00426858	0.951706	0.525361	2.978	2.713	2.352	2.634	2.74	2.819
ENSMUSG00000019948.4	Actr6	0.269374	0.0880603	0.162428	6.738	5.712	8.078	9.885	7.32	6.912
ENSMUSG00000015971.5	Actr8	0.10407	0.143444	0.203826	14.086	14.075	16.229	15.962	13.298	17.028
ENSMUSG00000026836.15	Acvr1	-0.0707115	0.704692	0.451	5.543	7.561	7.837	6.33	7.653	5.753
ENSMUSG00000052155.5	Acvr2a	-0.112644	0.588104	0.410569	4.103	6.238	7.472	5.607	5.183	4.887
ENSMUSG00000061393.14	Acvr2b	-0.569068	0.000874224	0.0126826	0.982	0.698	0.846	0.549	0.53	0.491
ENSMUSG00000000530.16	Acvrl1	0.288769	0.292838	0.288085	1.861	0.806	1.402	2.022	2.866	1.241
ENSMUSG00000023262.13	Acy1	0.129205	0.161389	0.215813	17.996	15.38	17.698	15.866	18.582	21.585
ENSMUSG00000008822.15	Acyp1	0.0818589	0.110244	0.179927	7.115	7.419	6.594	6.891	7.525	7.769
ENSMUSG00000060923.5	Acyp2	0.0258242	0.856871	0.499388	2.28	2.273	1.992	2.199	3.058	2.265
ENSMUSG00000017697.3	Ada	-0.048101	0.813385	0.486226	1.031	0.53	0.846	0.743	0.66	0.808
ENSMUSG00000027259.15	Adal	0.0660654	0.4363	0.353577	5.593	7.585	7.672	7.247	6.975	7.225
ENSMUSG00000054693.14	Adam10	0.171344	0.359524	0.319267	5.69	5.92	7.758	7.813	9.043	6.299
ENSMUSG00000020926.16	Adam11	0.299353	0.38426	0.330972	4.965	13.251	8.991	8.648	15.039	7.601
ENSMUSG00000028041.17	Adam15	0.287993	0.373358	0.326091	2.056	1.59	1.227	2.043	3.208	2.132
ENSMUSG00000011256.16	Adam19	0.151818	0.399352	0.338	0.39	0.375	0.525	0.495	0.54	0.465
ENSMUSG00000025964.15	Adam23	0.440233	0.051987	0.125947	1.625	1.321	2.411	3.187	3.187	2.18
ENSMUSG00000037437.18	Adam32	-0.646592	0.0769766	0.152763	0.27	0.278	0.476	0.151	0.5	0.19
ENSMUSG00000027318.17	Adam33	0.404645	0.114192	0.182833	0.975	0.713	0.88	1.226	1.425	0.755
ENSMUSG00000072972.3	Adam4	-0.180553	0.17265	0.222159	0.296	0.296	0.266	0.217	0.296	0.276
ENSMUSG00000025473.16	Adam8	0.285801	0.270649	0.276894	0.364	0.564	0.376	0.317	0.67	0.376
ENSMUSG00000031555.15	Adam9	0.106548	0.563617	0.40137	23.055	37.746	32.907	35.585	29.519	30.988
ENSMUSG00000022057.8	Adamdec1	0.529306	0.184895	0.229992	0.916	0.934	1.276	1.276	3.234	0.898
ENSMUSG00000022893.14	Adamts1	-0.000434563	0.998582	0.537001	2.745	3.343	3.504	3.854	4.117	2.643
ENSMUSG00000014852.16	Adamts13	0.193998	0.372557	0.32559	1.987	0.873	1.709	1.519	2.266	1.152
ENSMUSG00000059901.12	Adamts14	-0.0759491	0.639433	0.429161	0.289	0.249	0.346	0.314	0.322	0.249
ENSMUSG00000033453.8	Adamts15	0.287876	0.255813	0.269381	0.295	0.389	0.354	0.578	0.448	0.283
ENSMUSG00000036545.8	Adamts2	0.399019	0.254781	0.268672	0.754	0.445	0.804	1.026	1.546	0.643
ENSMUSG00000046169.10	Adamts6	-0.431885	0.118575	0.186149	0.333	0.392	0.38	0.226	0.44	0.238
ENSMUSG00000032363.15	Adamts7	0.269433	0.231818	0.256735	3.955	4.407	4.558	4.332	7.308	5.387
ENSMUSG00000030022.14	Adamts9	0.304328	0.208119	0.24375	0.383	0.341	0.355	0.554	0.667	0.312
ENSMUSG00000066113.16	Adamtsl1	0.434033	0.233338	0.257579	0.385	0.321	0.407	0.985	0.728	0.385
ENSMUSG00000036040.14	Adamtsl2	0.780952	0.0556486	0.130208	4.202	2.644	2.875	8.475	4.87	2.119
ENSMUSG00000015850.11	Adamtsl4	0.0746974	0.794165	0.480598	2.046	0.879	1.818	1.758	2.046	1.955
ENSMUSG00000043822.18	Adamtsl5	0.591277	0.0443586	0.116421	0.848	0.488	0.36	0.813	1.556	0.824
ENSMUSG00000056413.16	Adap1	0.526253	0.0878531	0.162169	0.447	0.435	0.87	0.8	1.282	0.6
ENSMUSG00000020709.15	Adap2	-0.429081	0.129866	0.194172	14.329	22.924	22.995	11.194	14.698	18.299
ENSMUSG00000027951.16	Adar	0.134932	0.52912	0.388942	5.23	6.266	6.611	5.79	8.851	5.218
ENSMUSG00000020262.15	Adarb1	0.23469	0.259443	0.270881	1.892	1.967	2.703	3.409	2.177	2.838
ENSMUSG00000031949.17	Adat1	0.218368	0.0738761	0.149755	1.856	1.88	2.239	2.814	2.215	2.491
ENSMUSG00000019808.8	Adat2	0.0465248	0.678207	0.442748	1.628	1.432	1.953	1.771	1.914	1.888
ENSMUSG00000113640.1	Adat3	0.329507	0.335288	0.308582	0.506	0.646	0.437	0.489	0.393	0.314
ENSMUSG00000035370.9	Adat3	0.0247091	0.924511	0.51884	0.364	0.324	0.499	0.445	0.526	0.715
ENSMUSG00000021044.15	Adck1	-0.137312	0.2686	0.275993	9.243	8.427	8.165	6.238	8.634	7.654
ENSMUSG00000046947.12	Adck2	0.157709	0.175009	0.223811	8.926	5.733	5.507	7.489	7.077	6.89
ENSMUSG00000020431.5	Adcy1	0.0472746	0.812297	0.485862	0.157	0.287	0.2	0.183	0.157	0.157
ENSMUSG00000020654.15	Adcy3	0.327113	0.262811	0.272854	0.376	0.297	0.657	0.642	0.751	0.344
ENSMUSG00000022220.14	Adcy4	0.210668	0.194513	0.235885	1.225	0.994	2.003	1.773	1.758	1.542
ENSMUSG00000022994.9	Adcy6	0.179801	0.483703	0.372129	9.795	15.931	15.306	15.402	13.814	13.429
ENSMUSG00000031659.13	Adcy7	0.23775	0.562682	0.401073	0.577	0.534	0.994	0.78	1.667	0.438
ENSMUSG00000005580.11	Adcy9	-0.0584237	0.814589	0.486602	2.319	3.658	4.751	2.96	3.262	3.809
ENSMUSG00000029778.12	Adcyap1r1	0.111266	0.736622	0.460911	0.53	0.272	0.666	0.515	0.817	0.272
ENSMUSG00000029106.14	Add1	0.0913265	0.57	0.404008	16.694	17.361	15.592	15.577	22.09	15.447
ENSMUSG00000050994.20	Adgb	0.420512	0.20937	0.244375	0.478	0.45	0.267	0.435	0.773	0.309
ENSMUSG00000031486.15	Adgra2	0.21121	0.379211	0.328681	1.299	0.78	1.491	1.928	1.696	1.094
ENSMUSG00000029090.12	Adgra3	-0.0276133	0.878462	0.505902	10.422	14.506	13.795	13.773	10.292	13.062
ENSMUSG00000044017.16	Adgrd1	-0.301819	0.0549459	0.12954	0.38	0.262	0.321	0.273	0.285	0.262
ENSMUSG00000032915.6	Adgre4	0.00458992	0.991697	0.535206	1.036	0.816	1.412	0.79	2.811	0.712
ENSMUSG00000002885.14	Adgre5	0.108581	0.732644	0.459753	7.005	4.292	8.125	8.165	12.511	4.535
ENSMUSG00000041293.5	Adgrf1	-1.34038	0.0188153	0.0749795	1.546	1.754	2.281	1.192	0.294	1.08
ENSMUSG00000056492.6	Adgrf5	0.262989	0.295491	0.289519	5.55	2.427	6.867	6.754	6.51	6.999
ENSMUSG00000031785.16	Adgrg1	0.277938	0.149971	0.20842	2.022	0.908	1.231	1.685	1.831	1.421
ENSMUSG00000031298.15	Adgrg2	0.433853	0.0988117	0.171449	0.657	0.763	0.785	1.421	0.848	0.721
ENSMUSG00000060470.7	Adgrg3	-0.112879	0.617937	0.421337	3.221	1.159	3.161	2.062	3.252	2.288
ENSMUSG00000061577.12	Adgrg5	0.293958	0.142823	0.203452	0.207	0.291	0.244	0.338	0.386	0.207
ENSMUSG00000022755.4	Adgrg7	-0.507997	0.198919	0.238495	0.069	0.082	0.549	0.075	0.069	0.096
ENSMUSG00000013033.16	Adgrl1	0.380761	0.111578	0.181048	1.606	1.209	2.098	2.116	2.797	2.079
ENSMUSG00000028184.12	Adgrl2	0.449543	0.0564499	0.131018	14.069	18.843	23.304	21.527	22.944	30.577
ENSMUSG00000039167.11	Adgrl4	0.26839	0.342308	0.311462	3.968	1.184	4.24	4.32	4.352	3.696
ENSMUSG00000069170.14	Adgrv1	0.526017	0.160253	0.215124	1.515	1.271	1.209	1.912	2.466	0.927
ENSMUSG00000074207.10	Adh1	0.228895	0.0299828	0.0960506	1448.34	1327.49	1184.16	1454.19	1660.93	1456.57
ENSMUSG00000037797.14	Adh4	-0.249749	0.132305	0.196064	108.349	137.693	112.452	97.849	124.93	81.234
ENSMUSG00000028138.8	Adh5	-0.0899585	0.163985	0.217235	263.497	258.642	255.405	217.702	247.146	253.599
ENSMUSG00000055301.8	Adh7	-0.224179	0.206067	0.242779	9.058	8.188	7.849	6.557	5.895	9.281
ENSMUSG00000025911.14	Adhfe1	0.00425737	0.970708	0.530023	57.358	65.94	61.631	49.642	67.409	65.242
ENSMUSG00000020629.12	Adi1	0.0649148	0.240557	0.261222	83.315	88.337	81.503	84.269	92.925	85.603
ENSMUSG00000044405.4	Adig	-0.339616	0.538126	0.392139	0.223	0.131	0.138	0.454	0.177	0.077
ENSMUSG00000026457.14	Adipor1	0.0727082	0.259417	0.270873	31.583	33.614	30.947	34.691	34.067	31.228
ENSMUSG00000030168.13	Adipor2	-0.331135	0.0345166	0.102824	141.256	171.411	167.458	97.73	130.643	145.372
ENSMUSG00000039197.10	Adk	0.0414878	0.574819	0.406012	364.973	424.881	421.532	409.833	416.639	390.889
ENSMUSG00000030790.15	Adm	0.20765	0.530173	0.389343	1.347	0.699	1.41	1.918	2.109	0.775
ENSMUSG00000051149.15	Adnp	0.048174	0.873155	0.504355	0.404	0.586	0.343	0.424	0.687	0.788
ENSMUSG00000053950.10	Adnp2	0.0177207	0.927573	0.519782	1.977	2.595	2.207	3.086	1.705	2.103
ENSMUSG00000057134.5	Ado	0.0762545	0.171886	0.221671	1.832	1.755	1.881	1.852	1.784	2.056
ENSMUSG00000042429.8	Adora1	1.02786	0.000330946	0.00709881	4.734	6.478	3.692	11.144	11.801	7.384
ENSMUSG00000020178.6	Adora2a	0.0359724	0.826208	0.490361	0.881	0.502	0.807	0.918	0.856	0.563
ENSMUSG00000025236.11	Adpgk	0.0137518	0.874383	0.504715	6.897	7.446	7.86	7.667	7.003	8.014
ENSMUSG00000031448.12	Adprhl1	-0.522487	0.215587	0.247748	0.14	0.14	0.14	0.14	0.14	0.14
ENSMUSG00000042558.16	Adprhl2	-0.126891	0.0754651	0.151412	6.457	6.271	5.617	5.204	5.941	5.721
ENSMUSG00000020910.16	Adprm	0.224596	0.0746225	0.150463	12.128	10.57	19.694	14.144	15.02	14.714
ENSMUSG00000045875.13	Adra1a	0.203321	0.229587	0.255469	1.572	1.525	1.271	1.757	1.664	1.294
ENSMUSG00000050541.14	Adra1b	-0.119114	0.377391	0.327756	48.162	53.813	46.199	40.013	49.629	45.505
ENSMUSG00000058620.5	Adra2b	0.450173	0.11354	0.182513	1.507	0.593	1.642	1.693	2.167	1.083
ENSMUSG00000031489.15	Adrb3	-0.721282	0.146145	0.205615	4.361	2.769	3.699	1.736	4.898	1.188
ENSMUSG00000039041.15	Adrm1	-0.0801345	0.446461	0.357494	40.362	40.433	32.631	37.306	30.846	39.335
ENSMUSG00000015961.8	Adss	0.183458	0.0277222	0.0918766	15.901	17.963	17.787	18.559	21.283	20.004
ENSMUSG00000011148.14	Adssl1	-0.332963	0.0225641	0.0823584	10.752	12.304	10.964	8.709	10.797	9.781
ENSMUSG00000058022.14	Adtrp	-0.240026	0.0285776	0.0936806	154.102	167.076	167.453	128.45	128.745	161.237
ENSMUSG00000020473.13	Aebp1	0.173036	0.635313	0.427721	0.661	0.269	0.744	0.95	0.77	0.391
ENSMUSG00000030232.18	Aebp2	0.263377	0.315428	0.299176	7.668	10.526	13.002	14.892	10.415	12.812
ENSMUSG00000030609.18	Aen	0.406587	2.67378e-05	0.00159532	9.045	9.25	9.856	12.793	12.28	13.343
ENSMUSG00000054452.10	Aes	0.121344	0.35623	0.31774	376.443	331.698	282.919	358.79	376.26	349.043
ENSMUSG00000029094.12	Afap1	-0.0307917	0.835243	0.492806	0.348	0.313	0.406	0.336	0.417	0.278
ENSMUSG00000033032.15	Afap1l1	-0.0902923	0.634797	0.427602	1.345	0.64	1.847	1.164	1.292	1.185
ENSMUSG00000025083.18	Afap1l2	0.164609	0.156446	0.212861	0.537	0.566	0.566	0.566	0.611	0.551
ENSMUSG00000029313.18	Aff1	-0.228177	0.290779	0.287145	3.705	4.684	5.479	3.506	4.755	3.861
ENSMUSG00000049470.13	Aff4	0.00914422	0.959966	0.527438	6.997	8.966	9.33	9.229	7.474	8.665
ENSMUSG00000038302.14	Afg1l	-0.0194501	0.789121	0.478938	5.227	4.16	4.791	4.222	5.156	4.498
ENSMUSG00000031967.15	Afg3l1	0.148399	0.0285167	0.0935217	16.069	16.305	15.055	15.862	17.318	16.974
ENSMUSG00000029369.17	Afm	-0.025634	0.707686	0.452102	141.325	110.355	120.72	127.833	108.591	122.358
ENSMUSG00000017718.15	Afmid	-0.0628097	0.630623	0.426156	78.715	54.847	80.759	62.512	66.536	64.088
ENSMUSG00000054932.6	Afp	0.368643	0.230805	0.256148	0.981	1.49	1.843	1.412	2.745	0.928
ENSMUSG00000049659.15	Aftph	0.234736	0.125284	0.190763	12.357	13.895	15.471	18.573	15.233	15.571
ENSMUSG00000031521.5	Aga	0.23329	0.0097669	0.0519971	12.425	10.825	10.371	13.55	14.632	12.209
ENSMUSG00000055013.15	Agap1	-0.144717	0.224886	0.253006	1.024	1.461	1.358	0.978	1.128	1.116
ENSMUSG00000025422.9	Agap2	0.503547	0.10066	0.173073	0.634	0.672	1.614	1.594	1.21	1.882
ENSMUSG00000023353.14	Agap3	0.0752096	0.540782	0.393121	17.491	17.901	18.276	21.533	17.925	16.695
ENSMUSG00000038836.15	Agbl3	-0.180785	0.0706795	0.146326	3.431	4.33	3.947	3.395	3.263	4.174
ENSMUSG00000015452.14	Ager	0.0243889	0.844432	0.495645	0.301	0.353	0.239	0.259	0.311	0.29
ENSMUSG00000026159.13	Agfg1	0.105744	0.536584	0.391657	5.166	5.615	6.635	7.644	6.175	5.117
ENSMUSG00000029722.15	Agfg2	0.192759	0.178474	0.225829	16.285	15.323	17.12	24.845	15.875	17.136
ENSMUSG00000021681.8	Aggf1	0.15526	0.0853068	0.160146	10.967	10.795	10.685	12.547	11.175	12.229
ENSMUSG00000029916.11	Agk	0.154495	0.224037	0.252707	3.841	4.317	4.481	4.333	4.875	5.203
ENSMUSG00000033400.14	Agl	0.195784	0.161799	0.216067	9.172	9.919	11.385	11.945	13.398	10.399
ENSMUSG00000040706.4	Agmat	-0.0110017	0.915449	0.516449	88.484	77.437	73.175	78.99	77.756	82.227
ENSMUSG00000050103.18	Agmo	0.0970603	0.155152	0.211786	34.161	30.37	29.633	32.208	31.444	33.522
ENSMUSG00000041530.16	Ago1	-0.0716131	0.645342	0.43116	4.455	4.422	5.735	3.94	4.322	4.488
ENSMUSG00000028842.15	Ago3	0.0959843	0.564865	0.401748	1.084	1.176	1.371	1.737	1.215	1.241
ENSMUSG00000042500.11	Ago4	0.292002	0.0646253	0.140337	0.925	0.733	0.733	0.829	1.234	0.983
ENSMUSG00000034254.17	Agpat1	0.249366	0.0195526	0.0764689	5.867	7.419	6.06	8.233	7.805	5.899
ENSMUSG00000026922.13	Agpat2	-0.344733	0.166963	0.219004	127.836	123.518	90.33	58.46	103.385	99.214
ENSMUSG00000001211.15	Agpat3	0.0658415	0.339447	0.310163	67.128	69.133	70.102	72.647	75.676	71.06
ENSMUSG00000023827.8	Agpat4	-0.0906905	0.7206	0.456211	0.682	0.555	0.537	0.573	0.91	0.491
ENSMUSG00000031467.10	Agpat5	-0.041056	0.759554	0.468933	3.328	2.137	2.723	2.269	3.394	2.723
ENSMUSG00000041936.18	Agrn	0.0142141	0.935538	0.52193	11.362	12.875	12.511	11.416	14.78	9.038
ENSMUSG00000031980.9	Agt	-0.153036	0.0962775	0.169714	244.95	234.961	224.4	223.274	189.281	214.659
ENSMUSG00000021557.15	Agtpbp1	0.109146	0.457708	0.361568	5.134	5.518	3.797	3.954	4.908	5.567
ENSMUSG00000049115.15	Agtr1a	-0.256083	0.105955	0.177303	45.028	50.119	53.204	42.507	43.95	34.579
ENSMUSG00000029007.8	Agtrap	0.178048	0.309759	0.296398	1.454	1.202	1.187	1.395	2.226	1.231
ENSMUSG00000026272.6	Agxt	-0.608544	0.00564788	0.0380092	166.743	136.368	123.932	86.346	89.421	101.183
ENSMUSG00000089678.8	Agxt2	-0.187809	0.200156	0.239314	86.477	78.55	76.395	62.067	92.077	63.626
ENSMUSG00000026491.13	Ahctf1	-0.125908	0.462032	0.363224	24.81	22.262	27.017	23.301	18.561	22.832
ENSMUSG00000027597.15	Ahcy	-0.312791	0.00543577	0.0371567	375.954	327.614	364.435	271.476	247.427	322.153
ENSMUSG00000027893.14	Ahcyl1	0.0742615	0.558868	0.399546	31.701	36.516	40.73	35.959	40.774	38.556
ENSMUSG00000029772.17	Ahcyl2	-0.133889	0.461285	0.362921	3.092	4.6	4.497	2.944	3.668	4.519
ENSMUSG00000037692.14	Ahdc1	0.543027	0.0641095	0.139828	4.887	5.057	6.079	10.528	7.878	5.155
ENSMUSG00000019986.17	Ahi1	-0.120168	0.562623	0.401064	0.426	0.548	0.322	0.592	0.252	0.444
ENSMUSG00000072812.4	Ahnak2	0.220794	0.384077	0.330874	0.215	0.196	0.264	0.264	0.391	0.206
ENSMUSG00000019256.17	Ahr	0.574822	0.0258708	0.0886901	6.819	7.6	8.264	15.479	8.178	12.353
ENSMUSG00000021037.7	Ahsa1	-0.00704647	0.957795	0.526938	54.627	58.642	55.097	66.407	45.964	49.169
ENSMUSG00000020288.13	Ahsa2	-0.112315	0.595544	0.413576	30.388	42.671	37.915	46.104	29.111	27.445
ENSMUSG00000035875.15	AI182371	-0.291607	0.00413882	0.0319393	231.432	276.914	250.855	178.731	200.438	234.157
ENSMUSG00000050812.18	AI314180	0.126619	0.224225	0.252774	20.824	24.394	23.457	25.219	25.31	21.954
ENSMUSG00000074384.4	AI429214	0.0205228	0.918022	0.517155	0.248	0.368	0.328	0.288	0.44	0.328
ENSMUSG00000046312.4	AI464131	-0.115715	0.576778	0.406633	11.501	10.436	11.486	7.409	12.369	12.095
ENSMUSG00000045165.6	AI467606	0.463124	0.121945	0.188457	0.265	0.265	0.24	0.366	0.542	0.265
ENSMUSG00000010290.7	AI597479	-0.0594135	0.765971	0.471215	4.93	6.123	6.799	6.265	5.323	5.417
ENSMUSG00000034382.14	AI661453	0.530765	0.00555408	0.0376107	7.581	8.121	9.633	13.003	14.471	10.584
ENSMUSG00000056383.10	AI987944	0.171622	0.0443632	0.116421	6.147	7.259	8.547	7.751	8.641	8.032
ENSMUSG00000042901.10	Aida	0.460951	0.036911	0.106124	6.228	6.683	7.724	8.732	11.024	8.585
ENSMUSG00000024397.14	Aif1	0.0359456	0.936308	0.522017	3.747	2.489	3.134	2.371	8.218	1.903
ENSMUSG00000001864.13	Aif1l	0.192512	0.430385	0.351329	0.18	0.555	0.291	0.444	0.333	0.347
ENSMUSG00000036932.14	Aifm1	0.0503295	0.581615	0.408294	47.601	46.912	42.636	40.324	46.842	48.081
ENSMUSG00000020085.15	Aifm2	0.0362148	0.53302	0.390469	8.978	7.92	9.164	8.723	9.232	10.338
ENSMUSG00000019806.13	Aig1	-0.16086	0.207105	0.243306	7.238	10.195	6.345	6.367	6.722	5.872
ENSMUSG00000037860.15	Aim2	0.348881	0.374294	0.326527	0.596	0.499	1.441	1.039	2.356	0.693
ENSMUSG00000028029.10	Aimp1	0.060434	0.220191	0.250667	17.532	18.134	16.417	18.565	16.967	17.592
ENSMUSG00000029610.13	Aimp2	-0.0571759	0.485963	0.373075	4.335	4.328	4.093	4.747	3.586	4.255
ENSMUSG00000022178.11	Ajuba	0.501603	0.132207	0.196054	2.537	2.001	2.71	2.427	5.594	2.348
ENSMUSG00000026817.14	Ak1	-0.503779	0.537937	0.392132	0.265	0.169	0.41	0.277	0.566	0.265
ENSMUSG00000028792.14	Ak2	-0.0449129	0.544948	0.394522	139.647	123.163	138.915	115.128	126.776	135.717
ENSMUSG00000024782.7	Ak3	-0.0473256	0.301944	0.292532	130.676	136.275	139.91	130.357	133.742	136.098
ENSMUSG00000028527.18	Ak4	0.168183	0.261373	0.27201	15.036	15.554	19.952	19.147	18.271	17.94
ENSMUSG00000078941.9	Ak6	0.0568827	0.39326	0.335084	22.252	25.115	22.746	25.993	21.842	25.692
ENSMUSG00000041323.6	Ak7	0.539178	0.00934172	0.0507834	0.202	0.169	0.178	0.299	0.315	0.258
ENSMUSG00000018428.15	Akap1	0.0104433	0.940014	0.522891	40.837	44.794	49.246	43.486	44.347	48.866
ENSMUSG00000047804.15	Akap10	0.108996	0.528819	0.388884	3.343	4.356	3.907	4.24	3.545	3.762
ENSMUSG00000022016.16	Akap11	0.0813661	0.796455	0.481299	4.535	5.441	7.057	8.602	4.634	6.405
ENSMUSG00000038587.9	Akap12	-0.232907	0.315174	0.299072	0.99	0.375	1.065	0.81	0.705	0.735
ENSMUSG00000066406.15	Akap13	-0.0256327	0.905862	0.514031	3.519	5.559	5.483	5.06	4.018	4.97
ENSMUSG00000059708.12	Akap17b	0.680318	0.0183311	0.0740596	0.867	1.229	1.108	2.26	1.383	1.492
ENSMUSG00000038729.23	Akap2	0.600199	0.0480204	0.120949	2.626	0.994	3.639	4.708	4.033	3.151
ENSMUSG00000039166.16	Akap7	0.0806543	0.595058	0.413381	5.238	5.748	6.259	5.238	7.5	6.054
ENSMUSG00000040407.17	Akap9	0.179473	0.451453	0.359178	15.81	15.228	16.225	19.944	17.68	15.789
ENSMUSG00000031023.5	Akip1	-0.0183706	0.862055	0.50075	14.65	13.49	12.258	9.939	13.656	14.08
ENSMUSG00000023075.9	Akirin1	-0.0317224	0.767328	0.47162	12.545	13.468	14.89	14.757	11.679	14.09
ENSMUSG00000028291.7	Akirin2	-0.0305246	0.768418	0.472038	15.508	19.212	17.512	17.63	16.446	16.223
ENSMUSG00000039158.11	Akna	0.188169	0.470573	0.366888	0.693	0.547	1.039	1.021	1.185	0.547
ENSMUSG00000028692.14	Akr1a1	0.18511	0.0580268	0.132865	236.983	229.612	198.634	243.54	288.986	240.295
ENSMUSG00000061758.13	Akr1b10	0.22902	0.554138	0.397793	1.399	0.655	1.9	1.553	2.862	1.027
ENSMUSG00000001642.18	Akr1b3	0.291864	0.340077	0.310503	5.003	3.51	4.032	5.426	7.802	3.438
ENSMUSG00000052131.7	Akr1b7	0.287173	0.526976	0.388204	0.405	0.506	0.228	0.279	1.076	0.253
ENSMUSG00000029762.6	Akr1b8	0.730117	0.0032592	0.0276358	2.459	1.829	2.121	5.226	3.689	3.535
ENSMUSG00000021211.4	Akr1c12	-0.0848466	0.0874009	0.161917	67.069	65.314	58.705	61.183	54.905	59.81
ENSMUSG00000021213.12	Akr1c13	0.141976	0.0343906	0.102766	94.382	88.081	88.366	103.571	105.13	93.223
ENSMUSG00000033715.15	Akr1c14	0.0818649	0.675975	0.442046	204.004	188.483	274.129	235.404	202.677	215.558
ENSMUSG00000021214.14	Akr1c18	0.556962	0.100656	0.173073	0.15	0.315	0.33	0.315	0.614	0.27
ENSMUSG00000071551.13	Akr1c19	0.211525	0.0207054	0.07874	47.427	50.674	50.569	60.226	55.445	54.797
ENSMUSG00000021210.16	Akr1c6	-0.0400145	0.62797	0.425201	870.61	645.102	712.895	744.49	717.147	673.397
ENSMUSG00000038641.12	Akr1d1	0.255624	0.0930353	0.166993	83.694	60.287	88.8	80.03	110.533	90.176
ENSMUSG00000045410.18	Akr1e1	0.0148918	0.879483	0.506198	17.99	19.312	23.187	18.456	21.489	19.83
ENSMUSG00000028743.7	Akr7a5	-0.0822439	0.558818	0.399526	93.383	87.68	67.03	72.625	83.129	82.772
ENSMUSG00000001729.14	Akt1	-0.0631521	0.367255	0.323066	18.006	23.199	23.754	21.916	21.904	20.424
ENSMUSG00000011096.17	Akt1s1	0.0449727	0.566641	0.402414	17.905	18.606	16.12	18.561	19.035	17.853
ENSMUSG00000004056.15	Akt2	0.075714	0.454037	0.360224	40.205	43.174	40.098	45.598	39.126	41.683
ENSMUSG00000019699.16	Akt3	0.159311	0.577701	0.406912	0.569	0.398	0.74	0.697	0.91	0.569
ENSMUSG00000031667.16	Aktip	0.155529	0.0917704	0.165895	7.936	6.5	7.699	8.131	8.145	8.341
ENSMUSG00000098546.6	AL593853.1	0.0963534	0.467472	0.365534	2.14	2.228	2.111	2.844	2.375	2.14
ENSMUSG00000097778.7	AL611930.7	0.255903	0.147832	0.206641	1.53	1.782	1.583	2.434	1.809	2.035
ENSMUSG00000115074.1	AL732309.2	-0.0103513	0.980336	0.532403	0.133	0.133	0.133	0.398	0.133	0.266
ENSMUSG00000028393.10	Alad	-0.152911	0.185247	0.230247	129.492	106.072	91.109	92.899	99.832	102.29
ENSMUSG00000032786.16	Alas1	-1.03655	0.0246213	0.086399	189.625	180.014	173.01	92.652	78.024	106.341
ENSMUSG00000025270.13	Alas2	0.296057	0.000488486	0.0089849	70.147	55.621	58.812	79.146	76.472	77.034
ENSMUSG00000029368.10	Alb	0.112275	0.464715	0.364352	43707.4	22025.4	40733.2	42772.7	32755.3	39396.6
ENSMUSG00000022636.13	Alcam	0.175628	0.578592	0.407211	10.651	10.233	18.184	20.077	15.246	10.401
ENSMUSG00000007833.15	Aldh16a1	-0.214676	0.00415817	0.0320254	43.164	38.493	37.987	32.917	34.7	36.21
ENSMUSG00000025007.13	Aldh18a1	0.539003	0.0322521	0.0995873	0.505	0.482	1.175	1.211	0.881	0.693
ENSMUSG00000013584.5	Aldh1a2	0.462461	0.0329002	0.100802	0.234	0.132	0.139	0.278	0.263	0.205
ENSMUSG00000015134.15	Aldh1a3	0.288996	0.24385	0.262832	0.452	0.326	0.251	0.452	0.389	0.326
ENSMUSG00000024747.3	Aldh1a7	0.421173	0.00740881	0.0442861	159.782	163.313	143.346	174.421	254.84	183.996
ENSMUSG00000035561.5	Aldh1b1	0.160254	0.601731	0.415912	66.236	47.516	74.722	55.098	119.898	60.308
ENSMUSG00000030088.15	Aldh1l1	-0.197905	0.0806664	0.156144	459.773	430.02	431.978	311.343	411.918	433.263
ENSMUSG00000029455.14	Aldh2	0.202058	0.00566561	0.0380542	2050.93	1877.85	1711	2205.33	2056.29	2025.29
ENSMUSG00000010025.19	Aldh3a2	0.573205	0.0034023	0.0282607	208.261	178.853	165.597	282.411	280.161	239.99
ENSMUSG00000028737.15	Aldh4a1	-0.115168	0.186026	0.230666	163.16	151.035	154.602	134.16	149.273	153.39
ENSMUSG00000035936.6	Aldh5a1	0.0764234	0.439238	0.354701	14.407	13.889	15.83	14.493	16.147	16.65
ENSMUSG00000021238.11	Aldh6a1	0.0980364	0.348802	0.314483	171.433	168.507	203.484	192.437	189.511	197.199
ENSMUSG00000053644.13	Aldh7a1	0.0424764	0.343096	0.311807	315.767	308.152	286.007	305.331	323.353	310.227
ENSMUSG00000037542.13	Aldh8a1	0.0452576	0.453575	0.359966	138.293	168.142	156.004	139.319	159.207	161.171
ENSMUSG00000026687.14	Aldh9a1	0.0328473	0.674872	0.441617	114.122	106.495	112.32	112.605	114.122	116.113
ENSMUSG00000030695.16	Aldoa	0.0631282	0.713074	0.453691	43.281	47.046	42.84	56.453	55.73	45.6
ENSMUSG00000028307.9	Aldob	0.133551	0.18235	0.228304	1654.32	1437.76	2203.94	1683.64	2063.12	1854.98
ENSMUSG00000017390.15	Aldoc	0.0716214	0.494179	0.376064	7.634	5.691	5.878	5.812	6.578	6.214
ENSMUSG00000039427.14	Alg1	-0.0763142	0.315588	0.299233	10.744	9.677	8.807	9.112	7.91	9.857
ENSMUSG00000063362.13	Alg11	-0.11201	0.413956	0.344463	6.099	9.083	8.45	7.486	6.499	7.264
ENSMUSG00000035845.17	Alg12	0.0248876	0.854544	0.498768	5.038	5.006	4.83	5.334	4.918	4.513
ENSMUSG00000041718.15	Alg13	-0.0609208	0.398767	0.337733	2.734	2.888	2.187	2.512	2.742	2.725
ENSMUSG00000039887.11	Alg14	0.0998453	0.131692	0.195542	18.031	18.611	18.031	17.322	20.326	18.779
ENSMUSG00000039740.6	Alg2	0.445335	0.0411432	0.112096	8.297	9.949	7.703	14.441	9.499	10.94
ENSMUSG00000036632.9	Alg5	-0.0236007	0.788674	0.4788	19.448	20.751	17.83	16.156	19.311	18.93
ENSMUSG00000073792.11	Alg6	0.213994	0.189005	0.232605	2.218	2.225	2.565	2.859	2.882	2.658
ENSMUSG00000035704.17	Alg8	0.0583468	0.360762	0.320003	5.208	4.948	4.42	5.536	5.234	4.481
ENSMUSG00000032059.13	Alg9	-0.105372	0.46719	0.365357	6.97	5.96	4.532	4.273	5.83	5.024
ENSMUSG00000079036.10	Alkbh1	-0.442875	0.00497544	0.0355427	3.887	4.52	4.567	3.04	3.32	2.68
ENSMUSG00000044339.12	Alkbh2	0.208913	0.306809	0.294909	3.551	4.433	3.054	5.363	2.906	3.753
ENSMUSG00000040174.14	Alkbh3	0.0543254	0.616266	0.420851	13.591	13.839	11.599	11.508	14.873	14.253
ENSMUSG00000039754.10	Alkbh4	0.168777	0.142383	0.203171	2.346	2.19	1.971	2.811	1.926	2.2
ENSMUSG00000042650.3	Alkbh5	0.107142	0.514289	0.383793	11.039	13.354	12.699	16.201	11.839	13.233
ENSMUSG00000042831.13	Alkbh6	-0.10261	0.352809	0.316369	5.695	5.941	5.24	5.156	5.971	5.641
ENSMUSG00000002661.14	Alkbh7	-0.35091	0.0136858	0.0631537	8.029	6.215	5.899	4.661	5.481	5.545
ENSMUSG00000025899.14	Alkbh8	0.187269	0.16902	0.220107	1.575	1.701	2.117	1.903	2.004	2.042
ENSMUSG00000063810.7	Alms1	0.116232	0.383556	0.330604	0.203	0.27	0.27	0.315	0.293	0.203
ENSMUSG00000000320.10	Alox12	0.0298671	0.837334	0.493507	0.47	0.359	0.373	0.483	0.497	0.483
ENSMUSG00000018924.6	Alox15	-0.356665	0.245978	0.263918	0.285	0.129	0.168	0.207	0.142	0.207
ENSMUSG00000025701.12	Alox5	0.344084	0.185663	0.230478	0.104	0.104	0.173	0.207	0.181	0.095
ENSMUSG00000060063.9	Alox5ap	0.847152	0.0194215	0.0763224	2.156	2.234	2.208	5.242	7.179	2.079
ENSMUSG00000028028.11	Alpk1	-0.187267	0.532937	0.390469	0.232	0.908	0.45	0.362	0.532	0.444
ENSMUSG00000038763.12	Alpk3	-0.293258	0.425034	0.349044	0.15	0.136	0.177	0.15	0.204	0.163
ENSMUSG00000028766.10	Alpl	0.704784	0.000743805	0.0115711	4.736	4.008	6.47	10.83	8.128	7.877
ENSMUSG00000026024.14	Als2	-0.198383	0.229962	0.25566	13.205	12.226	20.004	11.391	11.133	14.434
ENSMUSG00000044037.15	Als2cl	0.315147	0.104158	0.175907	15.181	17.569	22.117	22.155	25.187	20.771
ENSMUSG00000047528.13	Als2cr12	0.645866	0.0813759	0.156825	0.207	0.122	0.122	0.122	0.438	0.255
ENSMUSG00000025134.2	Alyref	0.00629129	0.942815	0.523378	11.992	11.924	9.95	10.653	9.67	10.475
ENSMUSG00000060244.1	Alyref2	0.179791	0.371897	0.325338	2.694	2.934	1.895	4.064	1.861	2.614
ENSMUSG00000022244.7	Amacr	0.0033527	0.965504	0.528825	100.918	98.909	84.655	84.361	88.059	101.852
ENSMUSG00000028356.4	Ambp	-0.302996	0.0371751	0.106475	1164.7	1868.51	1017.84	924.801	981.011	1112.41
ENSMUSG00000040506.16	Ambra1	0.34918	0.00613135	0.0397253	7.364	6.769	7.33	10.426	8.113	8.759
ENSMUSG00000075232.5	Amd1	-0.179978	0.267361	0.275255	18.358	21.671	20.465	17.924	15.978	18.286
ENSMUSG00000063953.3	Amd2	-0.110539	0.560722	0.4002	0.237	0.29	0.387	0.285	0.368	0.242
ENSMUSG00000015890.2	Amdhd1	-0.192084	0.168636	0.2199	121.791	118.954	108.425	82.936	113.597	111.576
ENSMUSG00000050332.7	Amer1	0.234504	0.122123	0.188619	0.437	0.528	0.588	0.724	0.588	0.633
ENSMUSG00000031751.14	Amfr	0.0626732	0.647806	0.43201	76.898	91.645	96.949	101.321	84.554	86.973
ENSMUSG00000050947.9	Amigo1	-0.35108	0.0986089	0.171253	2.077	2.562	2.242	2.221	1.839	2.727
ENSMUSG00000032593.5	Amigo3	0.154439	0.458061	0.361745	1.424	1.899	1.994	2.144	2.184	1.788
ENSMUSG00000042225.3	Ammecr1	-0.0384044	0.817211	0.487385	0.526	0.482	0.629	0.541	0.556	0.512
ENSMUSG00000021278.7	Amn	0.847429	0.0705403	0.146177	0.13	0.155	0.114	0.122	0.472	0.13
ENSMUSG00000068250.13	Amn1	-0.220119	0.2479	0.265137	3.648	4.647	3.058	2.693	5.056	3.214
ENSMUSG00000041688.16	Amot	0.405652	0.112156	0.181518	1.138	1.156	1.707	2.258	1.778	1.209
ENSMUSG00000013076.17	Amotl1	0.137537	0.551347	0.396802	0.942	0.486	1.355	1.163	1.163	1.148
ENSMUSG00000032531.15	Amotl2	0.0342277	0.852651	0.498393	13.852	11.483	12.477	14.813	13.239	10.886
ENSMUSG00000070385.12	Ampd1	-0.980545	0.283616	0.283461	0.15	0.15	0.15	0.15	0.21	0.15
ENSMUSG00000027889.17	Ampd2	0.324686	0.109142	0.179036	19.702	24.568	20.775	30.233	20.526	24.568
ENSMUSG00000005686.17	Ampd3	0.437245	0.0364673	0.105418	0.409	0.369	0.45	0.546	0.955	0.491
ENSMUSG00000032607.12	Amt	-0.0699159	0.515538	0.384293	42.922	39.067	43.773	35.282	43.946	38.529
ENSMUSG00000074264.12	Amy1	-0.052621	0.501745	0.37889	156.937	139.318	149.005	146.327	124.676	151.431
ENSMUSG00000050022.16	Amz1	0.166181	0.603358	0.416437	0.502	0.47	0.62	0.428	0.877	0.278
ENSMUSG00000020610.16	Amz2	0.00550022	0.928661	0.519941	6.739	8.644	7.945	6.968	8.05	7.705
ENSMUSG00000014355.10	Anapc1	0.027295	0.697915	0.448891	12.048	13.897	15.887	13.811	12.697	13.043
ENSMUSG00000036977.8	Anapc10	0.0193677	0.859476	0.500073	2.897	2.921	2.742	3.002	2.978	2.402
ENSMUSG00000025135.12	Anapc11	-0.119132	0.390752	0.333995	9.45	7.618	7.389	7.374	8.794	7.824
ENSMUSG00000035048.13	Anapc13	-0.051581	0.723412	0.456992	47.001	50.376	35.458	39.595	45.653	44.025
ENSMUSG00000030649.18	Anapc15	-0.0542036	0.69511	0.448132	9.609	9.39	8.178	7.623	9.748	9.405
ENSMUSG00000074780.2	Anapc15-ps	0.343724	0.362015	0.320548	0.171	0.18	0.207	0.342	0.288	0.27
ENSMUSG00000020107.10	Anapc16	0.160198	0.125711	0.191098	13.677	15.69	10.682	14.951	14.886	14.358
ENSMUSG00000026965.12	Anapc2	0.112458	0.341831	0.311261	25.204	22.266	24.561	27.576	29.826	25.051
ENSMUSG00000029176.13	Anapc4	0.336414	0.0297196	0.0955201	9.776	8.254	7.708	9.386	14.069	10.918
ENSMUSG00000029472.13	Anapc5	-0.0360003	0.722246	0.456656	42.1	38.892	36.888	36.614	37.404	37.485
ENSMUSG00000029466.11	Anapc7	0.102352	0.175758	0.224227	8.672	8.379	7.992	7.5	9.785	8.695
ENSMUSG00000072115.11	Ang	-0.522053	0.0371879	0.106485	133.716	265.326	117.267	116.749	76.159	137.504
ENSMUSG00000021257.14	Angel1	0.0554695	0.678032	0.442649	1.57	1.834	1.514	1.75	2.403	1.639
ENSMUSG00000026634.16	Angel2	0.121921	0.448476	0.358222	6.022	7.023	9.117	7.569	7.934	7.903
ENSMUSG00000022309.9	Angpt1	-0.0458087	0.815567	0.486844	0.337	0.179	0.326	0.316	0.358	0.253
ENSMUSG00000031465.6	Angpt2	0.227638	0.432021	0.351851	0.489	0.349	0.576	0.402	0.664	0.594
ENSMUSG00000004105.8	Angptl2	0.542422	0.113511	0.182513	6.744	2.546	7.541	9.057	11.875	4.703
ENSMUSG00000028553.12	Angptl3	-0.166435	0.0844996	0.159653	450.909	378.703	423.187	372.397	408.655	324.492
ENSMUSG00000038742.7	Angptl6	-0.0456351	0.819376	0.488111	9.141	3.256	5.874	5.267	6.555	5.235
ENSMUSG00000028989.3	Angptl7	-0.0735878	0.656782	0.435146	0.23	0.218	0.218	0.182	0.242	0.278
ENSMUSG00000047822.8	Angptl8	-0.0941567	0.848207	0.497029	152.015	48.152	85.236	59.19	211.416	48.715
ENSMUSG00000022265.7	Ank	0.20451	0.155143	0.211786	10.826	10.407	13.138	15.006	11.665	12.778
ENSMUSG00000031543.18	Ank1	-0.875995	0.213001	0.246107	0.191	0.313	0.295	0.208	0.208	0.191
ENSMUSG00000032826.17	Ank2	0.170035	0.443903	0.356319	0.902	0.827	0.464	0.677	0.915	0.852
ENSMUSG00000069601.14	Ank3	-0.441084	0.127612	0.192303	8.75	6.59	7.286	6.59	8.348	4.723
ENSMUSG00000020790.14	Ankfy1	0.0541579	0.751671	0.466184	4.196	5.056	5.838	4.561	5.981	4.809
ENSMUSG00000040351.11	Ankib1	0.0123688	0.939235	0.522607	3.37	4.135	4.21	3.533	3.934	3.771
ENSMUSG00000046295.13	Ankle1	0.490703	0.0577378	0.132529	0.235	0.318	0.177	0.388	0.377	0.188
ENSMUSG00000029501.14	Ankle2	0.220144	0.162904	0.216615	5.105	6.557	7.045	8.663	7.509	6.771
ENSMUSG00000036188.4	Ankmy2	0.150555	0.0556661	0.130208	3.846	3.348	3.279	3.224	4.33	3.708
ENSMUSG00000021661.16	Ankra2	0.106693	0.28328	0.283359	5.39	7.449	6.836	7.518	7.16	6.894
ENSMUSG00000031508.14	Ankrd10	0.131526	0.326405	0.304261	4.346	4.141	4.871	4.089	5.666	4.077
ENSMUSG00000035569.17	Ankrd11	0.0488334	0.548185	0.395891	9.157	10.583	10.783	11.184	9.404	10.206
ENSMUSG00000041870.16	Ankrd13a	0.00705794	0.914298	0.516232	8.614	8.549	8.981	9.533	8.333	7.36
ENSMUSG00000037907.16	Ankrd13b	0.291864	0.0554057	0.129978	1.173	1.35	1.217	1.903	1.417	1.66
ENSMUSG00000039988.14	Ankrd13c	0.076163	0.46117	0.362867	8.45	10.257	9.805	10.076	10.392	10.257
ENSMUSG00000047909.11	Ankrd16	0.0811074	0.451086	0.359084	10.474	11.696	11.533	11.277	12.394	11.079
ENSMUSG00000055204.15	Ankrd17	0.121182	0.128231	0.192966	8.098	9.628	9.649	10.325	10.138	9.68
ENSMUSG00000067653.12	Ankrd23	-0.550429	0.326964	0.304603	3.072	2.978	1.991	3.307	3.37	3.213
ENSMUSG00000054708.17	Ankrd24	-0.0446057	0.715991	0.454677	3.993	3.706	4.65	3.952	3.234	4.147
ENSMUSG00000007827.10	Ankrd26	0.145542	0.503927	0.379691	0.697	0.999	1.157	1.288	0.986	1.091
ENSMUSG00000034867.16	Ankrd27	0.219528	0.101243	0.173525	8.378	9.76	9.328	10.001	11.366	8.585
ENSMUSG00000014496.8	Ankrd28	-0.0685992	0.647223	0.431807	4.411	4.576	6.127	4.068	5.186	5.542
ENSMUSG00000022237.17	Ankrd33b	-0.402918	0.0464338	0.119052	6.394	5.912	6.703	4.761	4.465	7.161
ENSMUSG00000050914.16	Ankrd37	0.000256445	0.999467	0.537161	0.345	0.949	1.373	0.762	1.689	0.697
ENSMUSG00000079610.9	Ankrd39	-0.309021	0.0744568	0.150267	2.142	1.648	2.039	1.535	1.576	1.555
ENSMUSG00000020864.13	Ankrd40	0.0155535	0.879098	0.506081	25.514	26.621	25.865	26.178	29.903	25.787
ENSMUSG00000041343.19	Ankrd42	0.120506	0.591369	0.411965	0.416	0.456	0.308	0.322	0.697	0.496
ENSMUSG00000052331.14	Ankrd44	-0.0735408	0.728421	0.458448	1.733	1.386	1.964	1.689	2.614	1.343
ENSMUSG00000048307.8	Ankrd46	0.0332123	0.661778	0.436949	25.654	26.319	26.734	25.346	25.512	27.481
ENSMUSG00000031931.4	Ankrd49	0.0855646	0.426299	0.349583	3.575	3.659	4.77	5	4.504	4.082
ENSMUSG00000044864.16	Ankrd50	0.229148	0.174621	0.223491	2.086	1.735	2.34	2.054	2.802	2.754
ENSMUSG00000014498.9	Ankrd52	0.141879	0.673894	0.441302	6.214	8.599	10.094	11.3	8.39	8.888
ENSMUSG00000049985.15	Ankrd55	0.67918	0.00581876	0.0386804	0.115	0.125	0.163	0.278	0.297	0.173
ENSMUSG00000029607.14	Ankrd61	0.149189	0.592344	0.41229	0.209	0.209	0.314	0.366	0.34	0.366
ENSMUSG00000037904.14	Ankrd9	0.491992	0.0235924	0.0843154	1.174	1.698	1.34	1.857	1.973	2.156
ENSMUSG00000030909.6	Anks4b	0.226423	0.11603	0.184343	30.808	27.885	36.519	35.461	39.913	34.352
ENSMUSG00000074591.7	Ankub1	0.239305	0.10141	0.173588	0.294	0.25	0.294	0.308	0.352	0.308
ENSMUSG00000026199.17	Ankzf1	0.153668	0.0777412	0.153431	9.935	9.757	10.834	10.579	11.1	12.788
ENSMUSG00000036777.8	Anln	0.618791	0.137537	0.199559	0.185	0.303	0.264	0.409	0.989	0.514
ENSMUSG00000031075.18	Ano1	0.123163	0.54021	0.392927	1.074	0.761	1.089	1.163	1.283	0.82
ENSMUSG00000037949.8	Ano10	0.089704	0.726185	0.457667	4.131	4.121	3.604	3.038	6.623	3.939
ENSMUSG00000064210.7	Ano6	0.308018	0.315379	0.29915	1.442	1.394	2.456	2.202	3.184	1.6
ENSMUSG00000034863.9	Ano8	0.241763	0.12928	0.19374	1.751	1.777	1.435	2.264	1.869	1.422
ENSMUSG00000032249.14	Anp32a	-0.0836863	0.412837	0.343922	246.188	179.614	192.37	163.029	195.412	169.083
ENSMUSG00000028333.10	Anp32b	0.147	0.0432708	0.115031	27.478	27.279	22.065	29.698	24.26	25.27
ENSMUSG00000015749.12	Anp32e	0.11041	0.586772	0.410294	10.895	10.805	15.202	17.664	12.752	12.558
ENSMUSG00000039062.15	Anpep	-0.118494	0.435427	0.353279	39.362	41.438	24.337	24.617	30.632	28.968
ENSMUSG00000033420.12	Antxr1	0.166442	0.513093	0.383361	0.583	0.233	0.642	0.677	0.513	0.362
ENSMUSG00000029338.13	Antxr2	0.0813635	0.562368	0.400975	3.718	4.563	5.448	4.794	5.979	4.944
ENSMUSG00000021866.15	Anxa11	0.197695	0.00444562	0.0333341	16.113	15.604	15.379	18.254	18.045	17.73
ENSMUSG00000032231.14	Anxa2	0.714744	0.17302	0.222459	13.368	6.04	10.556	13.379	39.435	7.577
ENSMUSG00000029484.12	Anxa3	0.333394	0.275759	0.27936	2.765	1.83	5.444	4.397	6.359	2.576
ENSMUSG00000029994.17	Anxa4	0.170694	0.120183	0.187175	30.67	31.103	30.771	31.32	38.861	29.384
ENSMUSG00000027712.13	Anxa5	0.614646	0.0689313	0.144604	81.585	72.562	71.604	103.319	198.212	74.641
ENSMUSG00000018340.13	Anxa6	0.0563354	0.435114	0.353157	52.055	52.937	48.42	51.673	57.941	49.21
ENSMUSG00000021814.17	Anxa7	0.294118	0.0258153	0.0886552	38.064	46.964	40.858	48.897	56.689	43.475
ENSMUSG00000021950.15	Anxa8	-0.237479	0.100872	0.173228	0.182	0.12	0.139	0.153	0.096	0.115
ENSMUSG00000015702.13	Anxa9	0.180198	0.286141	0.284843	0.969	0.706	0.979	0.848	1.1	0.878
ENSMUSG00000021322.8	Aoah	0.319296	0.305687	0.294469	0.476	0.408	0.68	0.623	1.167	0.465
ENSMUSG00000078651.8	Aoc2	0.158773	0.43531	0.353213	0.521	0.521	0.375	0.64	0.521	0.768
ENSMUSG00000063558.4	Aox1	0.605356	0.000590213	0.010044	31.945	35.322	33.625	53.807	59.713	42.419
ENSMUSG00000064294.12	Aox3	-0.333978	0.0229228	0.082986	203.697	159.379	213.042	129.629	157.039	185.69
ENSMUSG00000074238.6	Ap1ar	0.0647358	0.710396	0.452859	13.632	19.625	16.408	15.16	17.936	17.672
ENSMUSG00000009090.17	Ap1b1	0.134977	0.0304243	0.0967209	19.791	19.471	19.191	20.777	21.191	21.257
ENSMUSG00000031731.16	Ap1g1	0.0237008	0.62163	0.422795	19.758	22.808	21.288	21.619	19.928	20.545
ENSMUSG00000040701.16	Ap1g2	-0.259852	0.104911	0.176597	5.857	6.816	5.602	3.94	5.937	4.227
ENSMUSG00000003033.15	Ap1m1	0.137857	0.0553184	0.129917	14.592	15.775	15.201	19.097	15.966	16.587
ENSMUSG00000003309.14	Ap1m2	0.432872	0.123826	0.189663	0.214	0.158	0.326	0.428	0.344	0.186
ENSMUSG00000004849.14	Ap1s1	0.0946101	0.266497	0.274788	16.058	15.823	15.391	14.573	18.783	16.03
ENSMUSG00000031367.15	Ap1s2	0.187408	0.517036	0.384838	1.564	0.98	1.486	1.905	2.885	1.189
ENSMUSG00000054702.14	Ap1s3	0.0135815	0.92831	0.519817	0.422	0.319	0.422	0.354	0.274	0.445
ENSMUSG00000060279.14	Ap2a1	0.162696	0.0633219	0.138927	12.834	13.397	13.23	17.056	14.804	14.023
ENSMUSG00000002957.11	Ap2a2	0.051516	0.618554	0.421588	19.1	20.105	20.306	19.703	22.279	20.155
ENSMUSG00000035152.14	Ap2b1	0.0430733	0.615522	0.420526	10.077	10.262	10.123	10.517	11.316	9.579
ENSMUSG00000008036.11	Ap2s1	-0.0201418	0.849947	0.497652	49.158	43.239	34.638	38.081	42.379	39.589
ENSMUSG00000020198.8	Ap3d1	0.15946	0.146418	0.205778	21.437	22.76	23.333	24.619	24.81	22.722
ENSMUSG00000021824.13	Ap3m1	0.253084	0.431472	0.351703	34.893	44.192	68.405	88.87	43.218	57.949
ENSMUSG00000031539.6	Ap3m2	0.275512	0.214601	0.24715	1.013	0.579	1.013	0.981	1.431	0.724
ENSMUSG00000063801.7	Ap3s2	0.0582372	0.567996	0.40304	9.68	7.761	11.44	9.871	10.369	7.994
ENSMUSG00000032952.11	Ap4b1	0.231832	0.0356606	0.104156	6.553	6.313	8.14	8.91	8.513	8.26
ENSMUSG00000001998.15	Ap4e1	0.109715	0.718163	0.455365	0.681	1.102	1.552	1.415	1.252	1.266
ENSMUSG00000020955.9	Ap4s1	-0.142322	0.130541	0.194691	7.07	6.264	7.18	5.546	6.022	6.623
ENSMUSG00000036291.6	Ap5m1	0.05781	0.600952	0.41565	5.498	6.035	6.15	6.419	5.524	5.486
ENSMUSG00000068264.11	Ap5s1	0.132327	0.289401	0.286435	10.767	12.853	8.799	9.351	11.037	10.994
ENSMUSG00000039623.13	Ap5z1	0.253771	0.0919157	0.166024	6.09	7.812	7.421	9.041	9.244	6.524
ENSMUSG00000019979.12	Apaf1	0.510129	0.0293408	0.094926	0.829	0.577	0.7	1.135	1.359	0.645
ENSMUSG00000030519.14	Apba2	-0.583185	0.0680332	0.143591	0.586	1.347	0.485	0.463	0.753	0.376
ENSMUSG00000004931.11	Apba3	-0.0486735	0.649143	0.432518	22.028	22.921	15.822	20.491	19.715	18.215
ENSMUSG00000037032.16	Apbb1	0.189172	0.22861	0.254931	0.334	0.459	0.434	0.376	0.459	0.409
ENSMUSG00000026786.14	Apbb1ip	0.342553	0.376694	0.327569	0.491	0.602	0.614	0.712	1.658	0.516
ENSMUSG00000029207.16	Apbb2	-0.125695	0.308543	0.295879	1.486	1.872	1.86	1.603	1.732	1.463
ENSMUSG00000026542.6	Apcs	-0.539157	0.0556756	0.130209	59.17	104.877	93.296	51.639	78.055	36.45
ENSMUSG00000032590.14	Apeh	-0.131541	0.187742	0.231853	28.482	26.761	25.417	22.393	22.969	25.818
ENSMUSG00000079042.10	Apela	2.23242	0.0741357	0.149867	0.106	0.106	0.106	0.234	4.506	0.106
ENSMUSG00000035960.14	Apex1	-0.0157135	0.891105	0.509322	24.206	21.721	22.94	25.363	18.235	24.308
ENSMUSG00000025269.16	Apex2	0.0620437	0.72407	0.457121	2.92	2.531	3.58	3.924	2.644	2.999
ENSMUSG00000015750.15	Aph1a	-0.092098	0.285163	0.28431	38.394	38.296	31.872	31.321	36.813	33.589
ENSMUSG00000032375.15	Aph1b	0.311519	0.306245	0.294656	0.786	0.697	0.643	1.108	0.822	0.857
ENSMUSG00000053040.13	Aph1c	0.170536	0.611457	0.419124	0.697	0.394	0.316	0.618	1.039	0.329
ENSMUSG00000027193.12	Api5	0.0746096	0.319731	0.301321	16.912	17.618	19.627	19.956	18.822	19.07
ENSMUSG00000010911.12	Apip	-0.0566243	0.634479	0.4275	12.557	9.705	9.041	9.358	12.172	9.72
ENSMUSG00000030051.10	Aplf	0.2487	0.0625527	0.138044	1.997	1.889	1.705	2.35	1.951	1.935
ENSMUSG00000006651.8	Aplp1	0.291186	0.160477	0.2153	0.205	0.227	0.318	0.303	0.417	0.205
ENSMUSG00000031996.17	Aplp2	0.127722	0.274531	0.278676	117.768	109.348	105.887	104.738	136.546	111.35
ENSMUSG00000033096.7	Apmap	0.118438	0.342484	0.311527	20.046	20.924	20.532	20.627	23.519	22.276
ENSMUSG00000032083.8	Apoa1	-0.37898	0.0316052	0.0984596	6310.55	4066.13	4054.04	4159.7	3204.48	3186.82
ENSMUSG00000005681.12	Apoa2	0.0378785	0.828701	0.491021	8114.79	7747.84	4997.03	6310.34	6856.78	7514.5
ENSMUSG00000032080.6	Apoa4	0.971173	0.00515108	0.0360896	93.815	85.166	95.667	197.298	237.32	110.713
ENSMUSG00000032079.12	Apoa5	-0.0466862	0.394674	0.335826	644.078	633.462	730.994	698.915	619.146	623.267
ENSMUSG00000020609.14	Apob	-0.0215054	0.614977	0.420337	987.289	1103.7	1133.69	1112.95	1037.45	1049.21
ENSMUSG00000040613.14	Apobec1	-0.886985	0.000778896	0.0119088	11.905	20.651	20.136	7.447	11.167	7.916
ENSMUSG00000042759.12	Apobr	-0.00999075	0.974671	0.53106	0.691	0.317	0.921	0.393	1.104	0.384
ENSMUSG00000040564.14	Apoc1	-0.138032	0.34278	0.311681	7071.3	5900.77	5419.43	5079.03	5804.91	5499.5
ENSMUSG00000002992.17	Apoc2	0.511716	0.0443922	0.116457	224.811	210.805	192.06	223.807	405.942	264.867
ENSMUSG00000032081.10	Apoc3	-0.0500686	0.650312	0.432988	2018.04	1685.93	1545.57	1803.27	1703.77	1617.8
ENSMUSG00000074336.5	Apoc4	-0.0909338	0.522269	0.386647	615.657	506.217	446.509	442.185	514.841	509.109
ENSMUSG00000022548.14	Apod	-0.18554	0.73339	0.459977	0.353	0.114	0.228	0.41	0.114	0.262
ENSMUSG00000002985.16	Apoe	-0.0324203	0.748836	0.464947	13633.4	12346.5	11424.6	11943.5	12925.9	12130.8
ENSMUSG00000047631.3	Apof	-0.175538	0.145452	0.205068	452.467	486.707	416.553	305.611	431.532	389.626
ENSMUSG00000000049.11	Apoh	-0.136603	0.0183386	0.0740746	1531.54	1314.19	1271.03	1201.09	1153.48	1221.31
ENSMUSG00000090698.2	Apold1	-0.242548	0.368709	0.323885	0.242	0.25	0.593	0.281	0.453	0.242
ENSMUSG00000024391.7	Apom	-0.475858	0.010935	0.0557875	131.654	103.054	110.351	85.937	68.637	83.148
ENSMUSG00000051716.6	Apon	-0.312118	0.0583881	0.13326	220.807	272.88	183.422	137.178	184.183	197.64
ENSMUSG00000079508.8	Apoo	0.149056	0.13003	0.194328	19.136	17.433	14.257	16.209	21.246	19.863
ENSMUSG00000025525.12	Apool	0.102048	0.288176	0.285755	17.494	16.204	16.01	15.466	20.754	17.106
ENSMUSG00000037787.14	Apopt1	0.0327632	0.743692	0.463423	14.968	14.103	12.465	13.385	14.112	13.578
ENSMUSG00000022892.11	App	0.256193	0.147609	0.206516	29.192	20.976	34.245	44.606	37.208	29.338
ENSMUSG00000018481.9	Appbp2	-0.0162242	0.915725	0.516501	4.417	5.736	5.608	5.288	5.006	4.98
ENSMUSG00000040760.11	Appl1	0.280414	0.157639	0.213523	1.432	1.357	1.507	1.344	2.048	1.872
ENSMUSG00000020263.14	Appl2	0.106232	0.410184	0.342905	16.572	17.523	20.662	18.868	23.567	18.258
ENSMUSG00000006589.8	Aprt	0.186193	0.250652	0.266537	21.36	22.078	16.482	17.835	28.73	21.459
ENSMUSG00000028411.15	Aptx	0.0682563	0.428526	0.350528	5.291	3.979	4.256	4.31	5.632	5.248
ENSMUSG00000004655.5	Aqp1	0.347872	0.184438	0.229726	46.168	14.108	48.114	52.956	42.89	48.497
ENSMUSG00000042797.9	Aqp11	0.241488	0.138751	0.200441	12.095	14.66	11.873	14.018	18.519	13.242
ENSMUSG00000030762.11	Aqp8	0.324448	0.425495	0.349202	119.068	98.296	74.769	51.985	202.265	118.221
ENSMUSG00000032204.13	Aqp9	0.0253681	0.740131	0.4622	139.893	168.484	129.074	137.587	143.913	154.673
ENSMUSG00000040383.16	Aqr	0.214515	0.168751	0.219948	4.813	4.89	7.149	6.422	6.035	6.732
ENSMUSG00000046532.8	Ar	0.568983	0.0016756	0.0185745	1.288	1.262	1.899	2.303	2.589	2.095
ENSMUSG00000001127.12	Araf	0.00351326	0.960274	0.527532	29.402	33.129	32.52	30.315	33.129	34.032
ENSMUSG00000032812.18	Arap1	-0.0818407	0.523578	0.387116	27.476	26.464	20.725	18.882	26.144	20.815
ENSMUSG00000037999.13	Arap2	0.085019	0.567399	0.402802	4.472	5.225	5.801	5.904	5.712	4.62
ENSMUSG00000032096.16	Arcn1	0.116948	0.480006	0.370537	52.369	60.791	63.992	72.832	56.908	59.477
ENSMUSG00000042350.13	Arel1	0.37113	0.0418712	0.113181	7.363	10.01	10.808	11.733	12.186	11.08
ENSMUSG00000048076.14	Arf1	0.0907707	0.183456	0.229133	121.288	134.415	127.961	139.823	132.562	128.469
ENSMUSG00000062421.13	Arf2	0.33644	0.0460217	0.118461	5.633	5.14	5.744	8.431	6.397	5.818
ENSMUSG00000021877.12	Arf4	0.156217	0.117944	0.185845	39.457	48.195	39.205	51.347	43.855	41.205
ENSMUSG00000020440.13	Arf5	-0.0760473	0.481898	0.371524	66.647	56.15	44.681	50.861	54.848	52.464
ENSMUSG00000044147.8	Arf6	0.112885	0.334953	0.308375	14.015	14.302	15.293	20.625	14.628	15.358
ENSMUSG00000027575.19	Arfgap1	0.306729	0.000344375	0.00730759	10.461	12.134	9.321	14.724	12.312	12.368
ENSMUSG00000027255.14	Arfgap2	0.0185849	0.756903	0.467887	51.193	44.896	45.488	50.859	41.645	46.164
ENSMUSG00000054277.8	Arfgap3	0.904701	0.0112184	0.0564098	3.584	5.494	2.991	11.713	5.778	5.652
ENSMUSG00000067851.11	Arfgef1	0.102709	0.701724	0.450084	28.326	34.176	43.5	41.864	34.856	34.84
ENSMUSG00000074582.10	Arfgef2	0.225084	0.163654	0.217033	6.012	6.199	6.87	6.511	7.76	7.667
ENSMUSG00000074513.9	Arfip1	0.291657	0.21449	0.247113	12.062	14.806	15.363	18.988	14.923	15.627
ENSMUSG00000030881.15	Arfip2	0.0531797	0.703825	0.450693	7.97	11.321	9.834	12.404	8.868	8.292
ENSMUSG00000038671.15	Arfrp1	0.0452982	0.536699	0.391668	13.982	14.486	11.7	12.671	14.638	12.494
ENSMUSG00000019987.9	Arg1	0.0181449	0.882972	0.507396	1060.57	894.378	955.808	812.873	900.942	1179.98
ENSMUSG00000021125.6	Arg2	0.299485	0.251265	0.266928	0.228	0.168	0.361	0.325	0.409	0.289
ENSMUSG00000040459.11	Arglu1	-0.00121472	0.988865	0.534622	13.409	12.02	14.775	16.441	12.842	13.109
ENSMUSG00000027247.16	Arhgap1	0.238662	0.108544	0.178816	7.886	8.334	9.798	10.515	11.366	8.498
ENSMUSG00000037148.8	Arhgap10	0.0865061	0.729433	0.45871	0.969	0.552	0.992	0.766	1.397	0.687
ENSMUSG00000041219.14	Arhgap11a	0.518588	0.0695261	0.145198	0.376	0.409	0.491	0.491	0.834	0.376
ENSMUSG00000041225.16	Arhgap12	0.0505478	0.781384	0.476339	9.394	9.378	8.96	10.327	10.762	8.622
ENSMUSG00000049744.15	Arhgap15	0.211696	0.468676	0.366007	0.192	0.376	0.434	0.343	0.551	0.251
ENSMUSG00000030766.15	Arhgap17	0.288479	0.0688688	0.144519	4.921	4.712	4.991	5.883	7.068	4.489
ENSMUSG00000039031.16	Arhgap18	0.11923	0.485889	0.373048	5.378	7.03	5.878	5.839	7.702	5.935
ENSMUSG00000063506.14	Arhgap22	0.920968	0.0690646	0.144771	0.256	0.256	0.232	0.232	0.944	0.256
ENSMUSG00000049807.16	Arhgap23	0.222607	0.133714	0.197	4.709	2.634	3.412	4.071	4.949	3.831
ENSMUSG00000057315.14	Arhgap24	0.0463931	0.852064	0.498227	7.214	3.94	7.56	5.005	9.211	6.469
ENSMUSG00000030047.14	Arhgap25	0.297581	0.478514	0.369935	0.852	0.549	1.02	0.897	2.624	0.617
ENSMUSG00000034255.17	Arhgap27	0.625454	0.0553858	0.129966	0.848	0.764	0.903	0.861	2.195	0.806
ENSMUSG00000024043.13	Arhgap28	0.0554644	0.73132	0.459371	0.205	0.193	0.253	0.289	0.277	0.181
ENSMUSG00000039831.16	Arhgap29	-0.101132	0.655995	0.434943	16.149	18.681	25.999	15.458	24.832	17.728
ENSMUSG00000048865.16	Arhgap30	0.325795	0.365499	0.322262	1.079	0.886	1.497	1.465	2.802	0.95
ENSMUSG00000022799.4	Arhgap31	0.205392	0.387704	0.332548	1.402	0.573	1.463	1.553	1.402	1.251
ENSMUSG00000041444.14	Arhgap32	0.126484	0.596148	0.413804	1.063	1.184	1.754	1.381	1.337	1.304
ENSMUSG00000036882.7	Arhgap33	0.215042	0.252892	0.267725	0.72	0.284	0.417	0.569	0.55	0.379
ENSMUSG00000058230.12	Arhgap35	0.0404468	0.804792	0.483654	11.528	15.415	15.918	13.505	13.723	14.058
ENSMUSG00000033697.15	Arhgap39	0.40506	0.0371251	0.106455	0.731	1.058	1.308	1.933	1.395	1.173
ENSMUSG00000031389.17	Arhgap4	0.553393	0.0359871	0.104665	3.143	3.577	3.378	4.733	8.417	4.425
ENSMUSG00000050730.17	Arhgap42	-0.347629	0.022824	0.0827633	11.111	12.527	15.809	10.483	9.554	11.279
ENSMUSG00000033389.16	Arhgap44	0.571885	0.00452661	0.0336773	0.352	0.341	0.352	0.488	0.522	0.5
ENSMUSG00000035697.14	Arhgap45	0.375477	0.0234598	0.0839946	3.469	2.847	3.261	4.659	5.656	3.391
ENSMUSG00000035133.9	Arhgap5	0.0938138	0.74869	0.464939	18.198	23.688	32.224	29.882	21.922	24.008
ENSMUSG00000031355.16	Arhgap6	-0.0967923	0.678658	0.442807	2.457	1.913	2.538	2.779	2.437	1.772
ENSMUSG00000078954.9	Arhgap8	-0.185559	0.398944	0.337821	0.177	0.169	0.169	0.097	0.153	0.161
ENSMUSG00000040345.10	Arhgap9	0.356977	0.378777	0.328458	0.592	0.541	0.949	0.979	1.867	0.5
ENSMUSG00000025132.13	Arhgdia	0.16431	0.200056	0.239239	34.695	31.639	28.629	41.64	41.546	27.75
ENSMUSG00000030220.13	Arhgdib	0.311233	0.245962	0.263915	5.008	2.876	4.656	5.918	7.425	3.884
ENSMUSG00000040940.18	Arhgef1	0.150813	0.0815064	0.156953	22.394	20.132	24.764	25.099	27.709	23.483
ENSMUSG00000071176.10	Arhgef10	0.386274	0.0122259	0.0590855	1.407	0.938	1.263	1.347	1.744	1.167
ENSMUSG00000040964.16	Arhgef10l	0.0656976	0.543761	0.394118	6.767	6.127	6.887	6.427	7.298	7.528
ENSMUSG00000041977.18	Arhgef11	0.208676	0.242535	0.262119	8.317	9.659	10.711	10.484	10.113	9.555
ENSMUSG00000059495.14	Arhgef12	0.0610142	0.669066	0.439483	8.053	11.174	12.015	12.43	10.345	10.837
ENSMUSG00000052921.13	Arhgef15	-0.0452512	0.729301	0.458687	2.621	1.393	2.372	2.123	2.339	2.372
ENSMUSG00000029032.12	Arhgef16	0.108269	0.637033	0.428299	1.446	1.88	2.126	1.591	2.979	1.865
ENSMUSG00000032875.8	Arhgef17	0.0495003	0.834777	0.492673	0.778	0.527	1.292	1.029	0.966	0.652
ENSMUSG00000004568.12	Arhgef18	0.445994	0.00707496	0.0430995	5.063	5.461	6.115	9.913	6.727	7.509
ENSMUSG00000028919.11	Arhgef19	0.0880758	0.4895	0.374323	36.824	37.419	32.714	35.988	40.198	40.268
ENSMUSG00000028059.15	Arhgef2	0.572787	0.23453	0.258102	1.696	1.086	2.291	5.579	3.333	1.294
ENSMUSG00000019467.15	Arhgef25	0.129832	0.578046	0.407058	1.454	0.887	1.198	1.5	1.985	1.134
ENSMUSG00000036885.14	Arhgef26	-0.519836	0.0230964	0.0833493	5.981	6.461	7.518	5.421	3.721	5.059
ENSMUSG00000021895.10	Arhgef3	0.70741	0.00485184	0.0350118	8.63	5.951	9.63	18.226	10.698	14.699
ENSMUSG00000054901.7	Arhgef33	0.0112487	0.974881	0.531089	0.2	0.2	0.381	0.481	0.2	0.381
ENSMUSG00000051517.14	Arhgef39	1.15782	0.000603288	0.0102007	0.384	0.285	0.57	0.731	1.302	0.607
ENSMUSG00000004562.16	Arhgef40	0.130329	0.401426	0.338929	4.738	5.009	3.204	5.55	5.505	3.813
ENSMUSG00000033542.13	Arhgef5	0.233499	0.108632	0.178848	7.115	7.658	7.275	8.041	10.4	8.004
ENSMUSG00000031133.12	Arhgef6	0.272821	0.20511	0.242132	1.173	0.828	1.357	1.265	1.805	1.368
ENSMUSG00000031511.15	Arhgef7	0.12287	0.421944	0.347805	5.816	5.845	7.331	7.446	8.774	5.57
ENSMUSG00000025656.17	Arhgef9	0.686163	0.00832679	0.047289	1.496	1.339	1.061	1.93	2.904	2.504
ENSMUSG00000007880.16	Arid1a	0.148002	0.491045	0.374787	6.667	6.492	8.919	8.328	9.247	7.804
ENSMUSG00000019564.12	Arid3a	0.480688	0.00973677	0.051883	0.378	0.327	0.603	0.633	0.623	0.562
ENSMUSG00000004661.15	Arid3b	0.240364	0.178277	0.225741	1.329	1.566	2.518	2.518	2.671	2.056
ENSMUSG00000048118.17	Arid4a	0.0991009	0.695265	0.448159	4.625	5.34	7.067	6.332	5.638	5.876
ENSMUSG00000039219.18	Arid4b	-0.00430655	0.986552	0.534024	4.46	6.641	6.297	5.985	5.871	6.117
ENSMUSG00000037447.16	Arid5a	-0.262007	0.465604	0.364773	0.403	1.701	0.45	0.579	0.822	0.269
ENSMUSG00000019947.10	Arid5b	-1.27301	0.000534566	0.00950193	6.376	17.192	9.582	4.865	3.484	3.927
ENSMUSG00000025234.11	Arih1	-0.00272061	0.984882	0.533664	7.853	10.076	10.289	10.345	8.256	9.361
ENSMUSG00000064145.12	Arih2	0.0783635	0.599845	0.415211	12.507	15.576	17.814	17.007	14.976	16.972
ENSMUSG00000060904.14	Arl1	0.0732077	0.412335	0.34373	60.161	71.223	68.031	77.938	63.8	66.284
ENSMUSG00000025870.10	Arl10	-0.0153778	0.910949	0.5155	2.12	2.869	3.349	2.685	2.671	2.473
ENSMUSG00000043157.8	Arl11	0.608149	0.207662	0.24358	0.189	0.147	0.305	0.315	0.725	0.158
ENSMUSG00000027122.15	Arl14ep	0.452619	0.011539	0.0573506	5.206	5.679	5.433	7.765	6.923	7.519
ENSMUSG00000042348.10	Arl15	0.112909	0.457504	0.361524	2.869	3.55	2.775	3.163	2.901	3.226
ENSMUSG00000057594.12	Arl16	-0.0728629	0.522118	0.386606	5.556	7.045	6.223	6.101	5.934	6.678
ENSMUSG00000031776.17	Arl2bp	0.634053	0.0105754	0.0544992	3.755	3.938	3.045	5.22	6.914	6.113
ENSMUSG00000047446.18	Arl4a	-0.179647	0.124674	0.190357	19.073	18.008	15.573	17.449	13.364	17.388
ENSMUSG00000049866.12	Arl4c	0.512742	0.249527	0.265976	0.505	0.456	1.01	0.798	2.525	0.587
ENSMUSG00000034936.2	Arl4d	-0.396245	0.126081	0.191326	25.006	15.792	41.616	24.692	14.87	20.383
ENSMUSG00000036093.7	Arl5a	-0.122326	0.251277	0.266928	25.939	28.751	31.512	25.073	23.677	27.691
ENSMUSG00000017418.13	Arl5b	-0.049605	0.671456	0.440462	5.464	7.888	5.593	6.252	5.062	6.072
ENSMUSG00000038352.15	Arl5c	0.237227	0.389684	0.333431	1.078	0.86	0.709	0.903	1.921	0.988
ENSMUSG00000022722.18	Arl6	0.203122	0.230144	0.255764	2.973	2.613	2.718	3.019	2.613	4.055
ENSMUSG00000030654.9	Arl6ip1	-0.114694	0.301047	0.292089	68.806	80.553	71.792	58.284	73.507	65.567
ENSMUSG00000029404.15	Arl6ip4	-0.104757	0.36634	0.322611	15.007	15.68	11.994	12.945	11.98	13.292
ENSMUSG00000035199.6	Arl6ip5	0.486543	0.0309618	0.097625	26.194	25.482	24.224	33.962	45.599	25.775
ENSMUSG00000026960.6	Arl6ip6	0.231372	0.466464	0.36511	8.664	10.563	10.017	16.019	9.275	14.076
ENSMUSG00000026426.10	Arl8a	0.120439	0.369045	0.32394	8.986	11.091	9.834	10.244	13.55	8.576
ENSMUSG00000030105.8	Arl8b	-0.0280916	0.884764	0.507998	22.163	32.358	33.727	35.734	25.513	28.056
ENSMUSG00000027599.9	Armc1	0.0480408	0.614916	0.420337	10.995	11.764	13.15	13.302	11.258	13.15
ENSMUSG00000038525.16	Armc10	0.259016	0.0444536	0.116524	4.042	3.458	4.026	4.241	4.718	4.533
ENSMUSG00000042178.6	Armc5	0.243162	0.00010271	0.00353886	2.664	2.58	2.673	2.963	3.216	3.029
ENSMUSG00000002343.11	Armc6	0.0741525	0.645991	0.431323	2.644	3.285	2.243	3.389	2.003	2.977
ENSMUSG00000057219.11	Armc7	0.256065	0.0818438	0.157319	1.945	1.761	1.696	1.788	2.445	1.748
ENSMUSG00000032468.11	Armc8	0.141815	0.355218	0.317292	4.252	3.781	4.452	4.481	5.308	5.265
ENSMUSG00000062590.13	Armc9	-0.029634	0.744081	0.463533	3.35	2.966	2.79	3.065	3.163	2.439
ENSMUSG00000033460.14	Armcx1	0.331882	0.233482	0.257579	1.859	0.566	1.333	1.482	2.169	1.145
ENSMUSG00000033436.13	Armcx2	0.230852	0.405225	0.340667	1.404	0.585	1.17	1.989	1.258	0.717
ENSMUSG00000049047.11	Armcx3	-0.163493	0.605696	0.41727	4.346	5.457	6.6	8.832	3.17	4.928
ENSMUSG00000049804.9	Armcx4	0.139008	0.551351	0.396802	0.185	0.213	0.278	0.278	0.343	0.195
ENSMUSG00000072969.2	Armcx5	0.239847	0.175837	0.224299	1.821	1.8	1.821	1.76	2.185	2.003
ENSMUSG00000050394.14	Armcx6	0.347123	0.198467	0.238195	0.422	0.267	0.464	0.436	0.774	0.296
ENSMUSG00000061759.15	Armt1	0.226136	0.0292192	0.0948307	5.906	5.728	6.563	7.2	6.49	7.794
ENSMUSG00000015522.18	Arnt	-0.140044	0.354658	0.317128	9.421	10.847	11.552	9.656	10.141	8.98
ENSMUSG00000055116.8	Arntl	-0.567865	0.0561415	0.130615	13.177	8.912	8.466	5.199	9.739	5.644
ENSMUSG00000040187.15	Arntl2	0.630121	0.00886153	0.0491227	0.382	0.781	0.781	0.83	0.98	0.996
ENSMUSG00000029621.14	Arpc1a	0.0866822	0.0552748	0.129892	28.156	28.947	25.862	30.753	28.967	26.428
ENSMUSG00000029622.16	Arpc1b	-0.0442261	0.727062	0.457931	24.261	24.546	22.784	23.328	28.458	18.137
ENSMUSG00000006304.14	Arpc2	0.13751	0.0749308	0.150727	74.046	68.349	74.451	78.595	87.995	70.353
ENSMUSG00000029465.14	Arpc3	0.077796	0.23783	0.259739	71.115	71.036	72.639	72.014	81.247	68.375
ENSMUSG00000079426.13	Arpc4	-0.0163227	0.803135	0.483171	31.573	26.846	25.965	28.184	27.718	26.388
ENSMUSG00000008475.13	Arpc5	-0.0380901	0.542911	0.393874	34.071	31.898	30.987	29.501	33.864	29.364
ENSMUSG00000026755.14	Arpc5l	0.0245847	0.745267	0.464021	25.081	29.841	22.118	28.824	23.687	24.687
ENSMUSG00000039043.5	Arpin	0.150729	0.365891	0.322399	2.604	2.737	2.723	2.631	3.821	3.014
ENSMUSG00000007656.13	Arpp19	0.120982	0.388344	0.332824	55.101	56.173	48.481	54.143	66.739	54.556
ENSMUSG00000018909.15	Arrb1	0.466366	0.0359443	0.104665	2.5	1.471	3.548	3.548	3.805	2.739
ENSMUSG00000060216.15	Arrb2	0.100381	0.535111	0.391268	12.125	9.292	12.175	10.841	17.476	10.501
ENSMUSG00000026972.15	Arrdc1	0.342403	0.0981434	0.171109	3.066	2.507	3.638	3.093	5.573	2.97
ENSMUSG00000110906.1	Arrdc2	0.0467059	0.884386	0.50784	7.574	2.178	6.293	8.725	3.556	5.663
ENSMUSG00000002910.11	Arrdc2	0.0467059	0.884386	0.50784	7.574	2.178	6.293	8.725	3.556	5.663
ENSMUSG00000074794.10	Arrdc3	0.466593	0.330111	0.306121	37.009	25.628	95.178	45.122	119.05	46.344
ENSMUSG00000042659.15	Arrdc4	0.352063	0.118266	0.186051	2.863	2.44	5.543	3.582	6.05	4.682
ENSMUSG00000022620.14	Arsa	0.415348	0.00962088	0.051627	32.743	37.971	34.438	43.163	44.805	53.049
ENSMUSG00000042082.7	Arsb	0.151447	0.359415	0.319213	6.821	8.856	9.675	9.339	10.89	9.441
ENSMUSG00000020604.13	Arsg	0.0883201	0.727637	0.45819	9.626	8.372	8.616	6.261	12.42	7.964
ENSMUSG00000021592.17	Arsk	0.268616	0.142206	0.203059	2.338	2.964	3.382	3.757	3.966	3.312
ENSMUSG00000030996.8	Art1	-0.977334	0.256801	0.269647	0.138	0.138	0.138	0.165	0.138	0.138
ENSMUSG00000030651.5	Art2b	0.702894	0.0135892	0.0629457	0.207	0.175	0.287	0.382	0.494	0.239
ENSMUSG00000034842.16	Art3	0.219371	0.513644	0.383539	3.019	1.095	2.237	3.145	3.817	1.486
ENSMUSG00000030217.2	Art4	0.602966	0.0711639	0.146801	1.122	0.561	1.151	1.877	1.974	0.784
ENSMUSG00000031982.5	Arv1	-0.0775444	0.658409	0.435799	1.72	1.245	1.957	1.516	1.912	1.561
ENSMUSG00000031591.14	Asah1	0.64081	0.0022541	0.0220807	27.408	28.3	43.222	50.862	58.651	42.479
ENSMUSG00000022377.16	Asap1	0.0930835	0.556781	0.398828	3.613	3.863	5.144	4.212	5.411	3.463
ENSMUSG00000036995.7	Asap3	0.431091	0.0417718	0.113089	2.734	4.735	3.779	4.957	5.468	3.112
ENSMUSG00000026311.16	Asb1	0.290274	0.0762432	0.152147	0.972	1.281	1.185	1.548	1.58	1.41
ENSMUSG00000031382.14	Asb11	-0.730574	0.227607	0.254461	0.129	0.108	0.108	0.151	0.108	0.108
ENSMUSG00000033781.7	Asb13	0.02878	0.850018	0.497652	18.739	20.038	22.49	25.52	18.803	20.887
ENSMUSG00000021898.14	Asb14	-0.613793	0.207907	0.243659	0.166	0.222	0.138	0.18	0.166	0.208
ENSMUSG00000034768.4	Asb16	0.455803	0.161209	0.215779	0.221	0.199	0.155	0.265	0.498	0.243
ENSMUSG00000021200.14	Asb2	-0.559279	0.36888	0.323885	0.62	0.41	0.538	0.281	1.065	0.725
ENSMUSG00000020305.13	Asb3	0.316126	0.0975028	0.170722	3.579	3.783	3.615	5.945	3.867	3.531
ENSMUSG00000031519.3	Asb5	-0.416274	0.370335	0.324697	0.348	0.209	0.348	0.522	0.331	0.279
ENSMUSG00000039483.10	Asb6	0.278739	0.00516086	0.0361139	3.989	5.084	3.978	5.704	5.632	4.443
ENSMUSG00000030509.17	Asb7	0.281134	0.085317	0.160146	2.196	2.613	2.436	3.206	3.158	3.238
ENSMUSG00000048175.13	Asb8	0.185924	0.00399665	0.0313364	8.969	8.63	7.907	10.64	9.33	9.33
ENSMUSG00000044475.14	Ascc1	-0.0635459	0.54252	0.393791	8.212	7.386	5.389	5.975	6.898	5.992
ENSMUSG00000020412.16	Ascc2	0.127515	0.15028	0.208613	8.668	10.121	10.17	10.971	10.281	10.195
ENSMUSG00000038774.9	Ascc3	0.348278	0.146174	0.205617	7.766	10.128	11.164	16.276	10.662	9.61
ENSMUSG00000019857.7	Asf1a	0.135217	0.0352557	0.103563	10.221	10.221	9.55	10.017	10.784	9.382
ENSMUSG00000005470.8	Asf1b	0.422522	0.103971	0.175676	0.457	0.469	0.241	0.529	0.734	0.313
ENSMUSG00000020884.15	Asgr1	-0.0236303	0.713046	0.453688	322.747	328.027	287	257.123	304.054	306.033
ENSMUSG00000040963.15	Asgr2	-0.160281	0.0342951	0.102602	142.23	140.806	117.052	111.302	113.536	116.416
ENSMUSG00000028053.13	Ash1l	-0.0157455	0.934456	0.521646	2.298	3.187	3.754	3.187	3.003	2.85
ENSMUSG00000031575.18	Ash2l	-0.00229109	0.984986	0.533693	8.387	7.757	7.587	6.957	9.018	9.201
ENSMUSG00000023017.10	Asic1	0.0178315	0.948324	0.524606	1.066	1.043	1.066	1.089	1.157	1.587
ENSMUSG00000038276.12	Asic3	0.00209662	0.993575	0.535619	0.165	0.34	0.268	0.371	0.144	0.237
ENSMUSG00000028008.10	Asic5	0.0856193	0.606173	0.417447	3.152	2.205	2.445	2.153	3.308	3.141
ENSMUSG00000025533.15	Asl	-0.0819446	0.608875	0.418225	353.417	287.366	338.608	256.009	283.636	408.261
ENSMUSG00000052456.9	Asna1	0.119988	0.150751	0.208793	16.49	16.967	15.646	17.679	17.481	16.938
ENSMUSG00000029752.12	Asns	-1.25527	0.0718407	0.14759	2.811	4.498	1.246	2.979	0.273	1.151
ENSMUSG00000026095.15	Asnsd1	-0.0384451	0.290677	0.287131	12.982	13.195	13.541	12.556	12.796	13.878
ENSMUSG00000020774.9	Aspa	0.0768566	0.584311	0.40929	8.026	8.587	11.631	7.802	10.718	12.912
ENSMUSG00000037686.6	Aspg	0.0131106	0.948254	0.524582	99.918	142.521	112.075	76.849	150.307	124.02
ENSMUSG00000028207.18	Asph	0.0513547	0.707622	0.452102	7.769	9.138	9.432	10.558	9.696	7.982
ENSMUSG00000033952.14	Aspm	0.555396	0.0124059	0.059638	0.155	0.167	0.142	0.348	0.232	0.232
ENSMUSG00000021388.14	Aspn	-0.408653	0.24488	0.263268	0.419	0.192	0.396	0.453	0.272	0.249
ENSMUSG00000024654.8	Asrgl1	-0.0183051	0.923865	0.518685	4.095	3.779	3.002	4.305	4.871	2.989
ENSMUSG00000076441.9	Ass1	-0.167925	0.209307	0.24433	2312.53	2288.68	1939.14	1844.89	1714.35	2287.64
ENSMUSG00000028373.16	Astn2	0.316719	0.211421	0.245414	0.401	0.184	0.466	0.466	0.531	0.271
ENSMUSG00000042548.14	Asxl1	0.0861263	0.65213	0.433711	2.779	4.392	4.072	3.627	4.447	3.891
ENSMUSG00000037486.18	Asxl2	0.133889	0.469667	0.366474	2.373	2.795	3.481	3.402	3.323	2.953
ENSMUSG00000022360.8	Atad2	0.427145	0.113986	0.182774	0.675	0.959	0.764	1.255	1.049	0.696
ENSMUSG00000052812.5	Atad2b	-0.00155341	0.994862	0.535962	2.303	3.008	3.008	2.889	2.463	2.955
ENSMUSG00000029036.18	Atad3a	-0.254183	0.0417853	0.113089	32.067	30.483	31.223	21.675	25.198	29.874
ENSMUSG00000017550.14	Atad5	0.0533852	0.743629	0.463414	0.487	0.524	0.475	0.499	0.475	0.645
ENSMUSG00000024426.17	Atat1	0.0319754	0.720674	0.456211	14.627	17.976	14.164	14.932	17.394	14.243
ENSMUSG00000030850.17	Ate1	0.0998704	0.512499	0.383128	6.396	6.28	7.801	8.021	7.569	7.079
ENSMUSG00000027104.18	Atf2	0.133295	0.426869	0.349802	7.595	9.993	9.603	12.244	9.445	9.554
ENSMUSG00000026628.13	Atf3	-0.240984	0.674075	0.441333	1.04	3.322	2.011	1.017	4.769	0.723
ENSMUSG00000038539.15	Atf5	0.177195	0.129039	0.193556	185.526	213.943	167.056	245.328	197.028	169.252
ENSMUSG00000026663.6	Atf6	0.291743	0.167139	0.219011	8.178	10.763	11.917	16.962	10.24	11.615
ENSMUSG00000015461.15	Atf6b	-0.00620087	0.925702	0.519261	9.388	10.144	8.657	10.566	8.698	9.12
ENSMUSG00000099083.7	Atf7	0.0479542	0.680413	0.443317	5.213	7.172	5.289	6.409	5.243	6.478
ENSMUSG00000030213.12	Atf7ip	0.303758	0.08645	0.161175	3.172	2.905	4.225	4.299	4.773	4.329
ENSMUSG00000021619.6	Atg10	-0.0308859	0.79953	0.482029	4.28	3.637	3.847	2.994	3.816	3.573
ENSMUSG00000027244.14	Atg13	0.366666	0.0344133	0.102789	16.751	23.549	16.167	30.93	20.047	21.711
ENSMUSG00000037526.7	Atg14	-0.149077	0.365471	0.322252	4.261	7.497	7.861	5.419	4.902	5.295
ENSMUSG00000026289.15	Atg16l1	0.0716961	0.234291	0.257942	10.249	11.331	11.312	11.292	11.099	11.341
ENSMUSG00000047767.17	Atg16l2	0.0285261	0.829878	0.491381	12.224	13.149	8.693	9.703	9.168	10.39
ENSMUSG00000041341.10	Atg2b	0.0534969	0.70558	0.451454	9.57	9.845	10.851	10.639	8.755	10.597
ENSMUSG00000022663.3	Atg3	0.0300613	0.606267	0.417497	41.172	42.021	45.131	43.91	40.067	44.347
ENSMUSG00000079418.3	Atg4a	0.396059	0.00145561	0.0171711	3.911	3.7	4.102	5.057	6.064	5.156
ENSMUSG00000026280.17	Atg4b	-0.00349817	0.974864	0.531089	20.659	17.743	18.333	20.931	18.392	17.295
ENSMUSG00000028550.15	Atg4c	0.0582272	0.723649	0.457083	6.104	8.221	7.464	8.283	7.216	7.572
ENSMUSG00000002820.6	Atg4d	-0.118269	0.0819265	0.157382	13.324	14.911	11.747	12.592	11.108	12.407
ENSMUSG00000038160.7	Atg5	0.0268815	0.679303	0.443035	20.47	21.577	21.308	19.508	22.736	22.747
ENSMUSG00000030314.16	Atg7	-0.0831744	0.514245	0.383783	13.253	12.433	11.37	10.374	13.06	11.01
ENSMUSG00000033124.15	Atg9a	0.0581064	0.598986	0.414889	22.913	24.338	23.571	24.968	20.791	23.79
ENSMUSG00000038295.14	Atg9b	-0.0955552	0.676402	0.442219	0.174	0.311	0.299	0.18	0.162	0.305
ENSMUSG00000026192.13	Atic	0.165032	0.232162	0.256839	11.074	10.72	12.808	12.309	12.637	13.491
ENSMUSG00000021066.9	Atl1	-0.00832614	0.96754	0.529296	0.851	0.813	1.169	0.877	1.055	0.966
ENSMUSG00000059811.13	Atl2	0.104723	0.60526	0.41717	33.103	37.457	43.547	45.172	32.307	48.543
ENSMUSG00000047388.10	Atmin	0.26458	0.0217363	0.0807338	1.752	1.781	1.866	2.407	2.179	2.122
ENSMUSG00000004263.15	Atn1	-0.0108672	0.952279	0.525523	4.14	5.338	3.94	4.114	4.46	2.915
ENSMUSG00000037621.8	Atoh8	0.907574	0.00755851	0.0447436	6.442	4.813	11.035	23.747	9.063	12.859
ENSMUSG00000018585.9	Atox1	0.180347	0.292588	0.287943	97.407	99.214	71.35	89.653	115.59	94.233
ENSMUSG00000031441.15	Atp11a	-0.661123	0.00473114	0.0344697	3.039	7.093	3.395	2.523	2.718	2.747
ENSMUSG00000037400.17	Atp11b	0.234632	0.0433099	0.115066	13.928	14.649	15.989	16.519	15.606	15.194
ENSMUSG00000062949.13	Atp11c	-0.163245	0.33152	0.306857	32.732	43.53	46.281	33.673	34.289	38.511
ENSMUSG00000031862.10	Atp13a1	-0.111638	0.0633335	0.138937	10.278	11.602	11.268	11.453	9.611	10.194
ENSMUSG00000036622.15	Atp13a2	0.0348469	0.748235	0.464833	5.428	4.991	5.17	5.339	6.561	4.61
ENSMUSG00000033161.10	Atp1a1	0.104035	0.411826	0.343501	81.761	84.764	104.59	107.465	88.399	96.495
ENSMUSG00000007097.14	Atp1a2	-0.390443	0.59491	0.413312	0.449	0.217	0.29	0.623	0.522	0.348
ENSMUSG00000026576.12	Atp1b1	0.135816	0.482716	0.371852	40.777	49.257	54.176	69.682	43.709	54.709
ENSMUSG00000041329.13	Atp1b2	0.148774	0.564403	0.401568	0.554	0.354	0.4	0.661	0.569	0.369
ENSMUSG00000032412.8	Atp1b3	-0.00382607	0.963343	0.5283	17.783	14.796	17.03	18.107	16.648	16.556
ENSMUSG00000025436.12	Atp23	0.274039	0.00115496	0.0149321	3.099	2.578	2.542	3.438	3.45	3.91
ENSMUSG00000030730.12	Atp2a1	-1.56808	0.278085	0.280468	0.26	0.379	0.237	0.497	0.331	0.26
ENSMUSG00000029467.15	Atp2a2	-0.0197107	0.936523	0.522077	41.172	69.883	57.412	75.604	43.415	48.015
ENSMUSG00000020788.15	Atp2a3	0.273693	0.40694	0.341365	0.526	0.401	0.777	0.877	0.902	0.639
ENSMUSG00000019943.10	Atp2b1	0.463908	0.0818313	0.157319	6.817	10.014	11.612	16.025	10.372	9.605
ENSMUSG00000030302.16	Atp2b2	0.593375	0.00753872	0.0446941	0.695	0.762	0.678	0.729	1	1.152
ENSMUSG00000026463.17	Atp2b4	-0.0277703	0.89866	0.511817	1.105	0.458	1.058	1.074	1.011	0.947
ENSMUSG00000032570.17	Atp2c1	0.134439	0.382006	0.32989	15.083	17.495	21.939	22.712	17.183	17.305
ENSMUSG00000005553.14	Atp4a	-0.818465	0.00842118	0.0476453	1.202	1.521	1.036	0.563	0.716	0.575
ENSMUSG00000025428.15	Atp5a1	0.0102539	0.871001	0.503776	210.695	180.868	195.007	183.406	212.49	199.948
ENSMUSG00000025393.12	Atp5b	-0.0351763	0.799436	0.482029	633.516	551.303	506.281	484.327	607.261	557.637
ENSMUSG00000025781.14	Atp5c1	-0.0865837	0.367666	0.323299	190.021	162.002	178.813	149.127	179.569	163.054
ENSMUSG00000003072.15	Atp5d	-0.129785	0.39793	0.337389	168.581	139.654	114.719	119.143	139.14	138.112
ENSMUSG00000016252.7	Atp5e	-0.038097	0.839711	0.494182	138.24	123.025	85.484	103.982	120.823	106.873
ENSMUSG00000000563.17	Atp5f1	0.0531869	0.213487	0.246461	233.926	207.392	237.82	223.352	245.685	225.469
ENSMUSG00000006057.15	Atp5g1	-0.127898	0.458961	0.361996	132.56	114.359	103.226	98.805	106.318	123.425
ENSMUSG00000062683.11	Atp5g2	0.337623	0.366138	0.3225	4.634	4.885	3.137	3.365	4.275	3.903
ENSMUSG00000018770.9	Atp5g3	-0.0241738	0.739287	0.461973	405.819	338.45	322.508	298.517	369.627	354.842
ENSMUSG00000034566.10	Atp5h	-0.124874	0.195413	0.236169	270.919	248.125	223.048	217.234	241.684	210.553
ENSMUSG00000022890.13	Atp5j	-0.0801313	0.406639	0.341269	267.108	239.062	232.718	221.133	234.278	229.831
ENSMUSG00000038690.15	Atp5j2	-0.0972873	0.509081	0.381778	171.196	138.999	135.588	121.362	153.157	142.505
ENSMUSG00000050856.16	Atp5k	-0.126754	0.447272	0.357786	159.332	120.089	116.753	108.959	118.202	122.75
ENSMUSG00000038717.8	Atp5l	-0.0995495	0.418659	0.346458	134.277	118.25	104.787	102.582	111.857	113.859
ENSMUSG00000054894.6	Atp5s	-0.0501785	0.724278	0.457149	4.382	4.382	3.952	4.167	5.211	3.532
ENSMUSG00000019087.13	Atp6ap1	0.0288176	0.80632	0.484107	39.536	44.496	47.257	47.886	42.965	40.766
ENSMUSG00000031007.2	Atp6ap2	0.131617	0.319087	0.301003	19.504	22.143	20.242	22.932	22.907	19.341
ENSMUSG00000019302.16	Atp6v0a1	0.0368734	0.655845	0.4349	15.126	13.109	14.292	14.566	14.728	15.898
ENSMUSG00000038023.12	Atp6v0a2	0.250331	0.09527	0.168791	5.52	7.035	6.559	7.732	7.787	7.677
ENSMUSG00000033379.13	Atp6v0b	-0.0260267	0.575154	0.406144	50.815	54.364	45.106	47.391	48.452	49.193
ENSMUSG00000024121.13	Atp6v0c	0.0979685	0.0143228	0.064675	108.566	112.956	103.396	111.481	118.23	105.192
ENSMUSG00000013160.7	Atp6v0d1	0.118761	0.0974931	0.170721	43.294	45.482	37.393	50.969	41.953	39.427
ENSMUSG00000028238.6	Atp6v0d2	-0.33884	0.335553	0.308594	0.756	1.004	1.099	0.744	0.685	0.508
ENSMUSG00000039347.7	Atp6v0e2	0.285196	0.188814	0.232501	0.546	0.412	0.433	0.485	0.753	0.464
ENSMUSG00000052459.13	Atp6v1a	0.119924	0.456705	0.361255	12.422	13.508	17.093	15.576	15.903	15.635
ENSMUSG00000006273.14	Atp6v1b2	0.0432413	0.783676	0.477083	17.02	16.121	17.804	17.048	22.013	14.238
ENSMUSG00000022295.8	Atp6v1c1	0.119417	0.15939	0.214696	8.51	9.143	9.681	10.582	9.758	9.269
ENSMUSG00000021114.9	Atp6v1d	0.136511	0.0161451	0.0691842	16.326	17.344	16.145	18.238	20.044	17.401
ENSMUSG00000019210.10	Atp6v1e1	0.110388	0.205569	0.242513	60.062	60.034	54.135	67.288	63.171	53.994
ENSMUSG00000004285.12	Atp6v1f	-0.0480657	0.527676	0.388378	41.081	37.943	35.77	34.42	39.137	38.989
ENSMUSG00000039105.6	Atp6v1g1	-0.266269	0.00274286	0.0249249	54.587	59.345	48.002	38.485	46.992	42.185
ENSMUSG00000024403.16	Atp6v1g2	0.427534	0.0172066	0.0715548	1.855	1.514	2.006	2.99	2.157	2.328
ENSMUSG00000033793.12	Atp6v1h	0.0852006	0.329662	0.305848	27.807	34.665	28.832	31.31	31.059	30.546
ENSMUSG00000033792.12	Atp7a	0.0155271	0.960519	0.52755	0.235	0.483	0.459	0.372	0.471	0.421
ENSMUSG00000006567.11	Atp7b	0.182457	0.354928	0.317165	5.569	4.498	6.298	5.205	7.54	6.169
ENSMUSG00000037685.15	Atp8a1	0.088519	0.725403	0.457446	0.737	0.614	1.243	1.013	1.29	0.66
ENSMUSG00000060671.12	Atp8b2	0.323544	0.272959	0.277834	0.603	0.407	0.729	1.093	1.107	0.575
ENSMUSG00000060131.11	Atp8b4	0.311745	0.185519	0.230449	0.582	0.582	0.508	0.478	0.986	0.538
ENSMUSG00000028457.18	Atp8b5	0.0629091	0.651498	0.433491	1.022	0.798	1.047	0.873	1.147	0.948
ENSMUSG00000027546.15	Atp9a	-0.0777556	0.295762	0.289567	18.271	18.453	16.553	16.677	17.412	15.6
ENSMUSG00000042709.14	Atpaf2	-0.0515336	0.315168	0.299072	12.167	12.109	10.649	11.525	12.062	10.696
ENSMUSG00000054428.12	Atpif1	0.0313314	0.859819	0.500147	16.399	13.259	15.986	12.92	21.101	12.964
ENSMUSG00000032409.15	Atr	0.264958	0.107542	0.178207	2.115	1.517	1.874	2.104	2.862	2.759
ENSMUSG00000013622.15	Atraid	-0.1653	0.0470618	0.11983	59.354	58.502	48.703	46.369	49.617	50.336
ENSMUSG00000027312.14	Atrn	-0.0965513	0.527996	0.388475	6.269	7.954	8.92	6.139	7.129	8.272
ENSMUSG00000031229.16	Atrx	0.189643	0.48287	0.371927	5.902	7.869	10.389	9.771	9.43	7.772
ENSMUSG00000046876.16	Atxn1	1.274	0.0242765	0.0856299	2.538	3.033	4.205	10.646	3.289	14.581
ENSMUSG00000069895.4	Atxn1l	0.0423923	0.901435	0.512641	4.447	3.646	4.652	4.227	5.076	3.913
ENSMUSG00000042605.16	Atxn2	0.271662	0.00284902	0.0255069	46.19	46.863	43.323	46.647	57.684	55.958
ENSMUSG00000032637.15	Atxn2l	0.0726285	0.635121	0.427679	23.587	34.648	29.286	36.956	28.104	26.049
ENSMUSG00000021189.11	Atxn3	0.133261	0.424167	0.34861	2.866	3.126	4.168	3.945	4.206	4.168
ENSMUSG00000021738.5	Atxn7	0.191971	0.370685	0.324786	2.795	4.17	5.161	4.865	4.259	4.185
ENSMUSG00000020564.17	Atxn7l1	-0.0628292	0.474952	0.368876	4.555	6.074	5.289	4.897	5.479	4.733
ENSMUSG00000048997.17	Atxn7l2	0.158429	0.184188	0.22958	1.158	1.171	0.825	1.451	1.211	1.025
ENSMUSG00000059995.12	Atxn7l3	0.0627372	0.714302	0.454	10.396	12.906	12.03	12.55	11.763	10.976
ENSMUSG00000074748.3	Atxn7l3b	0.0523701	0.748418	0.464865	31.168	37.267	36.296	36.467	33.21	37.639
ENSMUSG00000059820.14	AU019823	-0.0365033	0.786652	0.478047	4.02	4.956	7.333	5.487	5.12	4.665
ENSMUSG00000078584.9	AU022252	-0.255056	0.0428448	0.114453	11.778	12.215	10.971	7.957	10.971	10.644
ENSMUSG00000028830.14	AU040320	0.138057	0.108281	0.178705	6.965	7.437	6.87	8.328	8.274	7.1
ENSMUSG00000078435.5	AU041133	0.212225	0.131888	0.195759	1.622	1.448	1.934	1.749	2.097	1.795
ENSMUSG00000068328.9	Aup1	-0.104647	0.0712725	0.146947	91.571	91.317	78.578	83.879	82.42	78.271
ENSMUSG00000027496.15	Aurka	0.340363	0.0484082	0.121457	1.133	1.133	0.653	1.122	1.431	1.042
ENSMUSG00000065990.12	Aurkaip1	-0.10196	0.306861	0.294911	41.754	36.387	34.272	33.096	34.47	38.936
ENSMUSG00000020897.12	Aurkb	0.609467	0.120402	0.187365	0.29	0.324	0.243	0.406	0.742	0.197
ENSMUSG00000029673.17	Auts2	0.469431	0.213005	0.246107	0.15	0.204	0.193	0.644	0.236	0.139
ENSMUSG00000003604.14	Aven	-0.0391817	0.66804	0.439188	8.856	9.178	7.434	8.865	7.228	9.062
ENSMUSG00000029787.10	Avl9	-0.100721	0.587783	0.410544	2.364	3.913	3.619	3.045	3.379	2.912
ENSMUSG00000018821.3	Avpi1	-0.00612501	0.964067	0.528516	19.353	19.293	16.814	13.651	20.923	19.025
ENSMUSG00000020123.6	Avpr1a	-0.692219	0.0614054	0.136637	14.263	11.795	9.119	13.652	4.832	5.443
ENSMUSG00000078349.2	AW011738	0.163439	0.542738	0.393832	1.06	2.088	1.418	2.182	2.026	1.153
ENSMUSG00000074166.7	AW146154	0.295962	0.00686407	0.0423126	2.872	2.4	3.253	3.384	3.502	3.095
ENSMUSG00000039182.6	AW209491	0.172585	0.0834638	0.158767	8.15	8.122	9.159	10.335	8.353	9.511
ENSMUSG00000041935.10	AW549877	-0.00519617	0.980195	0.532403	6.963	8.239	10	7.754	9.951	8.384
ENSMUSG00000031220.14	Awat2	0.348446	0.0714243	0.147105	0.653	0.538	0.492	0.753	0.592	0.791
ENSMUSG00000024182.16	Axin1	0.0240636	0.88535	0.508084	9.869	10.781	12.228	13.516	9.638	9.971
ENSMUSG00000000142.15	Axin2	0.724497	0.032478	0.10007	2.903	2.109	3.505	4.08	8.462	3.396
ENSMUSG00000002602.16	Axl	0.174763	0.689111	0.446102	4.293	2.334	5.962	4.353	11.355	2.733
ENSMUSG00000044820.6	AY074887	0.300996	0.321064	0.30206	0.422	0.442	0.402	0.342	0.442	0.944
ENSMUSG00000037053.6	Azgp1	0.0252444	0.585184	0.409617	888.218	952.572	958.999	926.301	955.638	907.078
ENSMUSG00000039285.12	Azi2	0.117197	0.351937	0.316046	19.178	23.426	23.366	25.826	23.57	20.93
ENSMUSG00000037458.15	Azin1	0.103452	0.672241	0.440692	26.653	30.245	42.932	38.126	29.586	38.19
ENSMUSG00000028789.16	Azin2	0.252598	0.0734307	0.149262	0.836	0.862	1.202	0.941	0.941	0.967
ENSMUSG00000027165.16	B230118H07Rik	-0.0844816	0.439949	0.354914	10.747	11.36	11.309	9.227	10.503	11.066
ENSMUSG00000050538.8	B230217C12Rik	0.398693	0.0864157	0.161157	0.344	0.241	0.333	0.505	0.493	0.344
ENSMUSG00000045767.9	B230219D22Rik	0.182635	0.347588	0.313952	8.398	10.689	13.354	13.685	10.66	12.619
ENSMUSG00000060802.8	B2m	0.321841	0.0716134	0.147309	1672.76	1850.73	1658.92	1930.93	2924.83	1734.12
ENSMUSG00000043300.2	B3galnt1	0.431817	0.169856	0.220616	0.475	0.427	0.538	0.87	0.76	0.38
ENSMUSG00000039242.10	B3galnt2	0.146578	0.203186	0.240937	10.745	9.987	12.283	12.271	10.236	10.863
ENSMUSG00000034780.6	B3galt1	-1.1458	0.00325034	0.0276326	2.435	3.058	5.538	0.968	2.175	2.013
ENSMUSG00000050796.4	B3galt6	-0.185482	0.0595644	0.134597	0.67	0.778	0.856	0.622	0.569	0.808
ENSMUSG00000026156.8	B3gat2	0.129193	0.590826	0.411739	0.412	0.701	0.426	0.591	0.577	0.646
ENSMUSG00000051950.10	B3glct	0.265463	0.263017	0.272974	0.541	0.502	0.798	0.656	0.914	0.579
ENSMUSG00000031803.8	B3gnt3	0.0346599	0.85859	0.499773	1.094	0.615	1.349	1.019	1.379	1.139
ENSMUSG00000059479.7	B3gnt8	0.300435	0.0941074	0.167733	1.236	1.118	1.144	0.986	1.578	1.381
ENSMUSG00000069920.10	B3gnt9	0.186307	0.239851	0.260831	0.356	0.243	0.389	0.372	0.494	0.308
ENSMUSG00000046605.14	B3gntl1	0.550117	0.000221196	0.00565128	0.897	0.897	0.992	1.393	1.467	1.182
ENSMUSG00000006731.10	B4galnt1	0.0236875	0.810892	0.485452	33.836	30.382	32.464	39.719	27.407	31.725
ENSMUSG00000013418.8	B4galnt2	-0.202465	0.45761	0.361544	0.095	0.124	0.381	0.143	0.152	0.105
ENSMUSG00000041372.10	B4galnt3	0.363578	0.0660475	0.141574	0.997	0.748	0.997	0.97	1.44	1.579
ENSMUSG00000028413.13	B4galt1	-0.497988	0.0210507	0.0793468	10.249	17.483	11.258	7.235	10.446	7.984
ENSMUSG00000028541.14	B4galt2	0.252124	0.338224	0.30962	0.256	0.198	0.36	0.209	0.488	0.372
ENSMUSG00000052423.14	B4galt3	-0.0605481	0.43836	0.354439	5.202	6.095	5.406	4.986	4.922	4.692
ENSMUSG00000017929.13	B4galt5	-0.0424411	0.85623	0.499216	7.638	15.118	11.378	12.415	11.724	7.213
ENSMUSG00000056124.5	B4galt6	0.125313	0.622238	0.423061	0.398	0.42	0.641	0.53	0.828	0.431
ENSMUSG00000021504.14	B4galt7	-0.018116	0.822066	0.489044	5.039	5.25	5.5	5.219	4.688	5.758
ENSMUSG00000052364.4	B630019K06Rik	0.285195	0.0968383	0.170175	0.41	0.608	0.424	0.608	0.466	0.523
ENSMUSG00000092124.1	B930094E09Rik	0.0742161	0.724177	0.457129	0.314	0.257	0.228	0.342	0.356	0.328
ENSMUSG00000001039.12	B9d1	0.165321	0.280121	0.281666	0.489	0.238	0.31	0.383	0.39	0.436
ENSMUSG00000063439.7	B9d2	0.0931267	0.403604	0.339958	3.399	3.371	2.668	3.276	3.76	2.706
ENSMUSG00000039653.9	Baat	-0.0431579	0.415381	0.345098	159.353	143.199	178.14	148.51	158.764	156.642
ENSMUSG00000031820.9	Babam1	-0.155074	0.00562756	0.0379481	37.586	33.452	38.216	32.218	32.891	35.515
ENSMUSG00000052139.18	Babam2	0.032125	0.776939	0.474804	15.839	18.843	17.375	15.169	18.301	17.956
ENSMUSG00000032086.12	Bace1	0.103921	0.450303	0.358906	5.334	6.64	6.64	6.126	6.237	7.224
ENSMUSG00000025612.5	Bach1	-0.339689	0.178797	0.226099	4.532	9.81	5.821	5.111	4.866	4.673
ENSMUSG00000040270.16	Bach2	0.121119	0.55135	0.396802	0.888	0.577	1.41	1.3	0.934	1.136
ENSMUSG00000028416.12	Bag1	-0.0128382	0.901222	0.512575	50.791	43.735	41.169	45.728	42.337	46.3
ENSMUSG00000042215.8	Bag2	-0.0591414	0.718539	0.455469	2.3	2.676	2.893	3.284	2.372	3.211
ENSMUSG00000030847.8	Bag3	0.0117718	0.959782	0.527432	24.058	36.244	23.32	35.05	23.983	21.405
ENSMUSG00000037316.9	Bag4	0.0390987	0.792789	0.480121	7.059	8.262	9.125	8.035	7.766	9.096
ENSMUSG00000049792.6	Bag5	-0.0120528	0.836674	0.493281	7.709	5.887	6.386	6.947	6.965	6.623
ENSMUSG00000024392.17	Bag6	-0.071901	0.320445	0.301791	37.748	33.127	32.894	35.241	34.605	31.276
ENSMUSG00000039741.15	Bahcc1	0.836671	0.00127947	0.0159019	3.112	3.179	2.844	4.657	5.396	4.097
ENSMUSG00000040007.8	Bahd1	0.204466	0.391826	0.334474	3.946	4.685	4.097	5.961	5.205	3.257
ENSMUSG00000025372.16	Baiap2	0.691801	0.000658112	0.0107418	11.795	9.006	17.476	25.363	17.267	20.324
ENSMUSG00000038859.7	Baiap2l1	0.420681	0.0332856	0.101231	13.48	13.137	14.19	25.969	14.056	17.202
ENSMUSG00000047507.12	Baiap3	0.154672	0.53598	0.391494	0.189	0.248	0.272	0.402	0.201	0.201
ENSMUSG00000037922.13	Bank1	0.160076	0.670008	0.439876	0.655	0.367	0.747	0.721	1.337	0.341
ENSMUSG00000025316.16	Banp	-0.0931625	0.656736	0.435146	4.43	5.07	4.904	5.622	4.509	3.583
ENSMUSG00000021901.10	Bap1	0.160267	0.320772	0.30188	13.303	13.046	14.559	16.8	14.759	14.616
ENSMUSG00000026805.14	Barhl1	0.735859	0.00580388	0.0386199	0.386	0.274	0.225	0.386	0.386	0.499
ENSMUSG00000045763.8	Basp1	0.0599683	0.908682	0.514819	1.06	0.511	1.52	0.907	2.274	0.37
ENSMUSG00000034266.6	Batf	0.188089	0.583176	0.408928	0.268	0.343	0.674	0.567	0.664	0.246
ENSMUSG00000026630.9	Batf3	-0.0628452	0.90203	0.512811	0.288	0.425	0.317	0.283	0.879	0.142
ENSMUSG00000003873.11	Bax	0.142122	0.174996	0.223809	16.098	18.336	15.755	17.603	21.454	15.748
ENSMUSG00000035021.13	Baz1a	-0.113216	0.627171	0.424948	2.885	4.647	4.825	3.913	3.409	3.472
ENSMUSG00000002748.7	Baz1b	0.160018	0.358651	0.318795	7.883	8.606	11.086	10.698	9.339	10.116
ENSMUSG00000040054.16	Baz2a	0.104667	0.64339	0.430556	5.282	6.941	7.427	6.706	7.788	6.472
ENSMUSG00000026987.16	Baz2b	0.154472	0.207754	0.243614	5.128	4.089	5.333	6.153	5.628	6.717
ENSMUSG00000002083.13	Bbc3	0.550794	0.0326586	0.100383	11.186	6.143	8.216	9.189	15.204	12.158
ENSMUSG00000057265.13	Bbof1	0.749605	4.43845e-05	0.00217154	0.438	0.491	0.491	0.929	0.65	0.876
ENSMUSG00000041660.8	Bbox1	0.114762	0.232104	0.256839	46.984	43.116	53.349	51.437	53.478	51.194
ENSMUSG00000035759.4	Bbs10	0.343084	0.00722034	0.0436173	2.19	2.132	2.54	2.983	2.773	3.111
ENSMUSG00000051444.9	Bbs12	0.513756	0.0183749	0.0741143	0.281	0.251	0.325	0.385	0.488	0.311
ENSMUSG00000031755.6	Bbs2	0.368654	0.0897001	0.163995	1.843	2.44	1.761	2.389	2.347	1.421
ENSMUSG00000025235.8	Bbs4	0.089034	0.699728	0.449422	1.35	0.958	1.972	0.9	1.743	2.011
ENSMUSG00000063145.10	Bbs5	0.326872	0.0475116	0.120302	4.074	2.517	3.193	3.241	3.524	4.153
ENSMUSG00000037325.10	Bbs7	0.595822	0.000147791	0.00446346	1.452	1.353	1.791	2.567	2.328	2.427
ENSMUSG00000035919.16	Bbs9	-0.128629	0.198638	0.238316	1.261	2.102	1.897	1.66	1.434	1.347
ENSMUSG00000022641.15	Bbx	-0.0461426	0.701637	0.450057	1.074	1.268	1.436	1.087	1.177	1.177
ENSMUSG00000006010.14	BC003331	0.233239	0.189103	0.232677	22.388	25.018	31.298	30.888	32.797	26.758
ENSMUSG00000019132.11	BC005537	0.15496	0.333273	0.307683	62.584	65.44	65.364	69.761	74.702	57.431
ENSMUSG00000079065.3	BC005561	-0.190834	0.184407	0.22972	0.196	0.247	0.281	0.187	0.264	0.221
ENSMUSG00000026851.9	BC005624	0.0409038	0.488638	0.373995	14.665	12.695	14.335	14.299	13.721	13.828
ENSMUSG00000030780.15	BC017158	0.0320482	0.689355	0.446196	7.566	7.659	8.604	7.244	8.407	8.479
ENSMUSG00000039294.14	BC017643	0.00689769	0.914053	0.516165	5.507	5.442	5.413	5.395	5.966	5.282
ENSMUSG00000037594.11	BC022687	0.643155	0.0138932	0.0637233	0.416	0.416	0.284	0.864	0.656	0.536
ENSMUSG00000044361.16	BC024139	-0.40332	0.0792647	0.154649	3.73	2.746	4.065	1.952	2.235	3.63
ENSMUSG00000078786.9	BC024978	-0.206551	0.288463	0.285882	4.359	6.42	5.315	6.035	3.886	4.543
ENSMUSG00000074862.11	BC025920	0.396048	0.11709	0.185126	0.48	0.413	0.48	0.513	0.692	0.491
ENSMUSG00000033488.11	BC026585	0.511485	0.00620201	0.0399756	15.289	14.534	13.16	17.861	24.004	17.89
ENSMUSG00000038543.13	BC028528	0.380662	0.190301	0.233481	1.386	0.794	1.198	1.877	2.685	1.573
ENSMUSG00000074649.6	BC029722	0.446664	0.00752177	0.0446477	6.538	7.032	5.955	8.758	11.116	7.851
ENSMUSG00000046096.7	BC030336	0.0550498	0.687713	0.445676	7.718	8.452	8.878	10.624	7.047	8.825
ENSMUSG00000037593.11	BC030499	-0.404623	0.070401	0.146064	0.15	0.348	0.314	0.164	0.198	0.225
ENSMUSG00000033722.9	BC034090	0.0598181	0.742129	0.462877	0.373	0.269	0.476	0.347	0.277	0.321
ENSMUSG00000090164.8	BC035044	0.218625	0.357539	0.318226	0.299	0.276	0.242	0.265	0.403	0.184
ENSMUSG00000090486.2	BC035947	0.440614	0.0246545	0.0864326	0.186	0.211	0.161	0.211	0.273	0.285
ENSMUSG00000036948.17	BC037034	-0.035717	0.688595	0.445901	7.373	8.705	7.757	7.928	7.057	7.108
ENSMUSG00000053684.8	BC048403	0.09869	0.620387	0.422292	2.273	2.504	2.221	2.183	2.517	2.876
ENSMUSG00000049694.13	BC048671	-0.136467	0.632709	0.426859	0.39	0.471	0.431	0.592	0.444	0.363
ENSMUSG00000061877.13	BC048679	-0.622862	0.252172	0.267388	0.129	0.129	0.129	0.129	0.129	0.129
ENSMUSG00000091996.8	BC049352	0.235723	0.558061	0.399197	0.363	0.202	0.256	0.162	0.377	0.283
ENSMUSG00000047515.8	BC049715	0.3304	0.101499	0.173663	0.315	0.219	0.151	0.26	0.274	0.356
ENSMUSG00000040282.13	BC052040	-0.115539	0.626383	0.424727	1.688	2.179	2.006	1.458	2.872	1.544
ENSMUSG00000041406.14	BC055324	0.00950244	0.969004	0.52961	0.336	0.173	0.403	0.24	0.288	0.288
ENSMUSG00000094796.2	BC147527	0.432338	0.293876	0.288599	0.109	0.157	0.123	0.191	0.368	0.143
ENSMUSG00000002980.14	Bcam	0.010445	0.962852	0.528134	1.258	1.058	1.336	1.531	1.531	1.386
ENSMUSG00000020650.15	Bcap29	-0.011083	0.913005	0.515994	6.81	6.322	6.228	5.356	6.374	7.163
ENSMUSG00000002015.5	Bcap31	0.106183	0.0204727	0.0782077	95.753	99.4	88.74	99.671	101.615	95.357
ENSMUSG00000031955.10	Bcar1	0.326539	0.01415	0.0642953	10.625	10.094	13.407	13.73	16.823	12.268
ENSMUSG00000028121.8	Bcar3	1.16938	1.10757e-05	0.000903143	28.702	27.456	39.789	86.762	69.443	63.538
ENSMUSG00000005687.14	Bcas2	-0.0965088	0.0108241	0.0553517	17.064	17.697	15.555	15.576	14.922	15.666
ENSMUSG00000059439.15	Bcas3	0.125988	0.123456	0.189392	9.978	7.622	9.208	8.716	9.978	8.439
ENSMUSG00000030826.19	Bcat2	0.472933	5.10506e-05	0.00233454	15.865	11.821	15.241	23.017	20.677	18.529
ENSMUSG00000030983.4	Bccip	-0.0293862	0.446245	0.357433	48.579	50.425	43.626	44.788	42.299	46.37
ENSMUSG00000027792.11	Bche	0.277368	0.117504	0.185401	19.414	20.705	24.843	25.302	30.33	22.203
ENSMUSG00000060376.7	Bckdha	-0.0628388	0.626439	0.424727	96.594	87.619	73.263	71.258	89.557	82.713
ENSMUSG00000032263.14	Bckdhb	0.0408533	0.658075	0.435726	64.492	63.854	61.941	53.097	70.336	65.12
ENSMUSG00000030802.14	Bckdk	0.142025	0.227421	0.25437	5.588	4.894	4.963	4.816	6.413	5.371
ENSMUSG00000028191.11	Bcl10	0.232107	0.128886	0.193446	6.086	7.758	6.769	8.83	8.649	6.824
ENSMUSG00000057329.7	Bcl2	0.121857	0.466662	0.36516	0.302	0.235	0.392	0.37	0.493	0.28
ENSMUSG00000102037.1	Bcl2a1a	-0.343522	0.547416	0.395697	0.413	0.218	0.518	0.109	0.663	0.163
ENSMUSG00000089929.1	Bcl2a1b	0.240096	0.695887	0.448286	0.645	0.328	1.368	0.888	2.828	0.389
ENSMUSG00000099974.1	Bcl2a1d	0.120378	0.822779	0.489244	0.124	0.237	0.53	0.231	0.875	0.113
ENSMUSG00000007659.18	Bcl2l1	0.4508	0.0796044	0.155005	13.632	13.842	11.495	28.771	13.291	14.038
ENSMUSG00000027381.16	Bcl2l11	0.49069	0.0283259	0.0930892	0.816	1.286	1.484	1.855	1.892	1.484
ENSMUSG00000003190.12	Bcl2l12	0.0495958	0.592108	0.412229	4.9	4.224	3.84	3.611	4.626	4.233
ENSMUSG00000009112.4	Bcl2l13	0.11251	0.287223	0.285294	5.195	6.222	6.355	6.741	5.28	6.657
ENSMUSG00000030200.13	Bcl2l14	0.391114	0.0940493	0.167708	0.266	0.227	0.177	0.266	0.355	0.167
ENSMUSG00000044165.12	Bcl2l15	-0.0113866	0.957265	0.526839	0.115	0.206	0.272	0.255	0.148	0.181
ENSMUSG00000089682.10	Bcl2l2	0.212487	0.257313	0.269962	9.683	12.279	13.066	13.138	14.033	13.227
ENSMUSG00000053175.17	Bcl3	-0.242798	0.154961	0.211702	11.809	18.609	10.311	10.28	12.294	8.739
ENSMUSG00000022508.5	Bcl6	1.38417	0.035583	0.10406	4.14	14.66	6.352	29.131	6.973	26.353
ENSMUSG00000000317.11	Bcl6b	-0.176753	0.230714	0.256091	1.263	0.818	1.387	0.978	1.227	1.227
ENSMUSG00000029438.9	Bcl7a	0.273416	0.0904	0.164711	3.035	2.727	4.853	4.746	4.16	3.837
ENSMUSG00000029681.12	Bcl7b	0.192666	0.0246591	0.0864326	7.363	7.921	6.726	9.001	8.523	8.532
ENSMUSG00000030814.17	Bcl7c	-0.296178	0.212905	0.246089	11.958	8.112	5.16	5.536	7.324	8.052
ENSMUSG00000038256.15	Bcl9	0.557543	0.0347607	0.102963	1.216	1.237	2.149	2.392	2.372	2.149
ENSMUSG00000063382.6	Bcl9l	-0.0525655	0.791966	0.479841	10.634	11.847	11.344	13.489	12.453	9.421
ENSMUSG00000037608.16	Bclaf1	-0.0291342	0.827302	0.490608	13.488	17.584	16.055	14.55	15.53	15.355
ENSMUSG00000044150.12	Bclaf3	0.0946748	0.632037	0.426597	1.585	1.185	1.556	1.756	2.085	1.499
ENSMUSG00000031845.15	Bco1	0.255923	0.0232713	0.0836563	2.267	1.512	2.245	2.445	2.568	2.234
ENSMUSG00000032066.9	Bco2	-0.100073	0.493175	0.375607	16.847	13.315	13.124	10.614	16.38	12.657
ENSMUSG00000040363.15	Bcor	0.382125	0.0424297	0.11387	1.778	1.938	2.793	3.381	3.355	2.66
ENSMUSG00000036959.15	Bcorl1	-0.125585	0.474677	0.368757	2.275	3.364	2.158	2.644	2.236	2.158
ENSMUSG00000009681.10	Bcr	-0.0980758	0.534614	0.391044	10.236	11.029	9.567	8.216	12.082	9.406
ENSMUSG00000026172.12	Bcs1l	-0.0210141	0.845179	0.49592	8.999	8.12	7.283	7.503	8.79	8.173
ENSMUSG00000028167.15	Bdh2	0.0643978	0.494818	0.376331	19.123	15.679	15.772	16.816	18.624	17.58
ENSMUSG00000021070.6	Bdkrb2	0.339214	0.0117722	0.0578105	0.114	0.114	0.149	0.201	0.184	0.14
ENSMUSG00000048482.14	Bdnf	0.696275	0.000451354	0.00859307	0.605	1.21	1.04	1.621	1.476	1.306
ENSMUSG00000049658.13	Bdp1	-0.262793	0.133761	0.19703	1.731	2.448	2.973	2.2	1.823	1.924
ENSMUSG00000035086.13	Becn1	0.132777	0.178525	0.225872	47.591	46.428	47.839	54.894	46.774	48.99
ENSMUSG00000038214.15	Bend3	-0.138839	0.452617	0.359619	1.152	1.097	1.584	1.208	0.997	1.263
ENSMUSG00000028545.13	Bend5	0.467438	0.12851	0.193134	0.148	0.168	0.139	0.247	0.198	0.208
ENSMUSG00000048186.14	Bend7	0.00935457	0.954529	0.526165	3.194	4.258	4.894	5.021	3.67	3.686
ENSMUSG00000032757.6	Bet1	0.243683	0.0689821	0.144648	61.176	70.214	59.062	85.969	70.285	76.385
ENSMUSG00000025484.9	Bet1l	0.313458	0.0138258	0.0635451	11.933	14.13	12.222	19.277	13.783	15.528
ENSMUSG00000046432.12	Bex3	-0.183227	0.475848	0.36906	0.941	0.599	0.77	0.762	1.151	0.537
ENSMUSG00000047844.3	Bex4	0.516128	0.069721	0.145377	0.292	0.282	0.301	0.376	0.762	0.31
ENSMUSG00000074489.9	Bglap3	-0.127198	0.710885	0.453036	1.335	2.511	1.538	1.968	0.679	1.38
ENSMUSG00000031375.17	Bgn	0.327898	0.257122	0.269839	59.684	23.106	51.781	64.566	76.491	31.052
ENSMUSG00000052271.7	Bhlha15	1.15909	0.0397631	0.110204	0.182	0.441	0.192	1.271	0.279	0.456
ENSMUSG00000072964.14	Bhlhb9	0.252755	0.150187	0.208581	0.573	0.704	0.819	0.999	0.852	0.983
ENSMUSG00000030103.11	Bhlhe40	-0.0687139	0.776128	0.474555	45.458	31.498	69.466	46.415	54.643	36.377
ENSMUSG00000030256.11	Bhlhe41	0.742944	0.0234982	0.0840863	0.322	0.565	0.801	0.959	1.084	0.69
ENSMUSG00000074768.6	Bhmt	-0.0210497	0.918895	0.517394	1228.52	777.165	1132.49	782.437	1492.67	963.71
ENSMUSG00000042118.7	Bhmt2	-0.0679785	0.591447	0.411974	95.087	74.079	83.646	62.06	89.868	87.004
ENSMUSG00000014329.14	Bicc1	0.588351	0.10911	0.179036	0.829	0.68	1.261	1.546	1.979	0.965
ENSMUSG00000037933.16	Bicd2	-0.00465509	0.979025	0.532055	5.424	5.414	6.932	7.121	6.472	5.54
ENSMUSG00000041609.16	Bicdl1	0.74131	3.02769e-05	0.00172429	1.768	1.046	1.292	2.445	1.937	1.968
ENSMUSG00000070808.4	Bicra	0.583019	0.0187177	0.0747885	2.312	1.67	2.68	3.781	3.505	2.661
ENSMUSG00000004446.12	Bid	0.433639	0.0143147	0.0646534	8.854	8.078	6.511	7.561	11.293	9.193
ENSMUSG00000098112.7	Bin2	0.271881	0.451648	0.359275	1.544	1.345	1.484	1.185	3.496	0.926
ENSMUSG00000022089.9	Bin3	0.234893	0.0224434	0.0821709	5.769	5.858	5.096	6.125	6.748	6.062
ENSMUSG00000057367.12	Birc2	0.473022	0.034067	0.102286	7.735	8.903	8.708	13.257	11.044	9.9
ENSMUSG00000032000.17	Birc3	0.234782	0.232764	0.257257	7.583	6.958	8.954	9.801	12.786	8.289
ENSMUSG00000017716.15	Birc5	0.98606	0.00358394	0.0292367	0.463	0.509	1.095	0.802	2.159	1.187
ENSMUSG00000041684.11	Bivm	0.16376	0.37931	0.328708	5.203	5.969	7.599	8.011	8.502	7.403
ENSMUSG00000067787.10	Blcap	0.0304521	0.797835	0.481613	15.682	15.362	11.556	13.932	17.029	13.682
ENSMUSG00000014453.4	Blk	0.363516	0.222859	0.251902	0.296	0.269	0.458	0.525	0.795	0.256
ENSMUSG00000030528.12	Blm	0.437608	0.309654	0.296348	7.352	1.929	10.806	9.685	6.778	9.764
ENSMUSG00000020840.10	Blmh	-0.275689	0.0189289	0.0751955	20.549	16.687	18.579	15.774	12.672	18.524
ENSMUSG00000061132.13	Blnk	1.0783	0.00609131	0.0396422	1.323	1.512	1.663	3.251	4.726	2.344
ENSMUSG00000090247.7	Bloc1s1	0.00195946	0.989961	0.534787	50.142	51.374	41.007	40.085	55.299	49.569
ENSMUSG00000057667.7	Bloc1s3	0.257593	0.00775889	0.0454758	2.414	2.575	2.133	3.179	2.817	2.428
ENSMUSG00000060708.4	Bloc1s4	-0.0849981	0.345285	0.312839	6.088	6.203	6.362	6.333	5.483	6.117
ENSMUSG00000038982.10	Bloc1s5	0.0888394	0.490296	0.374624	6.845	5.591	7.586	6.649	8.946	5.954
ENSMUSG00000005804.14	Bloc1s6	0.231169	0.0433379	0.115066	6.568	8.146	7.928	9.365	10.224	7.671
ENSMUSG00000001999.15	Blvra	-0.00548046	0.969901	0.529922	8.535	6.798	8.904	6.257	9.007	7.417
ENSMUSG00000040466.16	Blvrb	0.399264	0.0677108	0.143359	101.558	94.389	80.02	106.939	167.82	102.102
ENSMUSG00000026577.13	Blzf1	0.266666	0.125144	0.190696	4.345	5.075	5.922	7.406	5.534	5.357
ENSMUSG00000040093.15	Bmf	0.125026	0.622684	0.423199	1.569	1.642	2.262	1.842	2.225	1.806
ENSMUSG00000026739.13	Bmi1	-0.052597	0.798529	0.481853	8.244	9.072	10.887	9.039	11.268	9.229
ENSMUSG00000022098.10	Bmp1	-0.261906	0.022684	0.0825529	35.887	29.757	36.61	24.195	28.467	29.19
ENSMUSG00000030046.6	Bmp10	-0.273126	0.247225	0.264748	1.003	0.664	1.505	0.959	0.797	0.974
ENSMUSG00000027358.6	Bmp2	0.38928	0.110184	0.179885	6.442	2.274	6.209	7.371	6.043	7.089
ENSMUSG00000034663.13	Bmp2k	0.489606	0.00130598	0.0161253	1.626	1.643	1.92	2.439	2.387	2.422
ENSMUSG00000021835.15	Bmp4	0.431495	0.0661997	0.141652	2.584	1.827	2.245	3.445	4.176	1.957
ENSMUSG00000032179.7	Bmp5	0.091256	0.714209	0.45397	4.103	2.078	5.004	4.017	5.367	2.822
ENSMUSG00000039004.6	Bmp6	0.873004	0.00723589	0.0436313	3.116	1.019	2.307	5.543	3.236	5.124
ENSMUSG00000008999.7	Bmp7	0.771559	0.00144347	0.0170728	0.657	0.677	0.518	1.115	0.996	1.354
ENSMUSG00000002384.2	Bmp8b	0.330365	0.306073	0.294607	0.138	0.222	0.13	0.153	0.39	0.153
ENSMUSG00000031963.8	Bmper	0.148205	0.606722	0.417619	0.245	0.276	0.353	0.337	0.521	0.215
ENSMUSG00000021796.15	Bmpr1a	0.0499701	0.775026	0.474156	4.967	6.443	7.707	6.768	6.568	6.03
ENSMUSG00000067336.6	Bmpr2	0.0721132	0.618732	0.421648	2.908	3.067	3.731	3.505	3.412	3.147
ENSMUSG00000030138.8	Bms1	0.157172	0.0199437	0.0771868	5.699	5.873	6.317	7.281	6.124	6.895
ENSMUSG00000042742.7	Bmt2	0.191807	0.22922	0.255229	2.236	3.031	3.295	3.148	3.501	3.075
ENSMUSG00000049086.8	Bmyc	-0.596312	0.0144781	0.0650162	2.469	4.301	2.188	1.485	2.323	2.4
ENSMUSG00000011958.17	Bnip2	-0.00787833	0.959476	0.527429	22.136	25.676	27.861	26.132	24.858	23.665
ENSMUSG00000078566.8	Bnip3	-0.0472387	0.747795	0.464708	102.431	116.253	135.065	111.253	102.47	110.027
ENSMUSG00000022051.15	Bnip3l	0.0868594	0.502249	0.379097	43.537	56.735	60.597	70.923	54.293	57.629
ENSMUSG00000022687.12	Boc	0.357101	0.11971	0.186748	0.206	0.146	0.194	0.34	0.279	0.182
ENSMUSG00000044502.16	Bod1	0.0260431	0.665825	0.438365	13.079	13.146	11.302	12.839	12.416	12.992
ENSMUSG00000061755.10	Bod1l	0.167972	0.309844	0.296443	1.524	1.485	2.071	2.28	1.902	1.785
ENSMUSG00000026278.14	Bok	0.03505	0.869354	0.503261	7.591	4.396	5.275	6.088	6.882	3.857
ENSMUSG00000015943.11	Bola1	-0.104821	0.523958	0.387265	13.245	10.001	8.85	7.698	11.268	9.478
ENSMUSG00000047721.8	Bola2	-0.105164	0.51791	0.385152	14.379	15.161	12.045	11.992	12.722	14.199
ENSMUSG00000045160.14	Bola3	0.1497	0.148969	0.207456	46.5	46.126	43.75	45.386	61.434	49.085
ENSMUSG00000022070.7	Bora	0.285556	0.0572602	0.131974	0.714	0.725	0.747	0.995	0.768	0.79
ENSMUSG00000042992.15	Borcs5	0.260615	0.0222054	0.0817007	5.099	4.941	4.432	5.626	4.704	5.406
ENSMUSG00000045176.3	Borcs6	0.158279	0.0910208	0.165257	4.352	4.104	3.239	4.472	4.555	4.407
ENSMUSG00000062376.7	Borcs7	0.199329	0.039368	0.109454	3.074	3.231	3.062	3.255	4.042	3.376
ENSMUSG00000002345.18	Borcs8	0.0839909	0.28166	0.282458	13.345	13.453	13.766	13.198	12.425	13.6
ENSMUSG00000038871.5	Bpgm	0.0508218	0.567533	0.402843	8.2	5.954	7.926	8.866	7.09	7.782
ENSMUSG00000038286.11	Bphl	-0.0428632	0.777907	0.475137	108.964	90.67	80.357	74.575	107.534	85.988
ENSMUSG00000026617.16	Bpnt1	0.314411	0.0144915	0.0650318	38.271	38.785	43.612	55.974	47.893	49.762
ENSMUSG00000040481.17	Bptf	0.0907876	0.491008	0.374787	5.125	7.308	7.183	6.697	7.881	6.659
ENSMUSG00000002413.15	Braf	0.123565	0.521149	0.386327	2.451	2.817	3.718	3.76	2.62	3.225
ENSMUSG00000029458.14	Brap	0.0978397	0.249	0.265689	37.508	46.561	41.703	44.546	39.71	48.787
ENSMUSG00000000148.17	Brat1	0.53784	0.000551372	0.0097037	4.384	4.356	4.27	6.212	6.512	5.869
ENSMUSG00000017146.12	Brca1	0.873902	0.000135038	0.00422161	0.329	0.484	0.45	0.796	0.744	0.726
ENSMUSG00000041147.10	Brca2	0.744039	0.00280721	0.0252821	3.727	2.443	3.396	6.646	4.721	5.88
ENSMUSG00000031201.17	Brcc3	0.214443	0.0403369	0.110981	10.553	9.446	12.135	14.49	12.48	12.242
ENSMUSG00000026918.16	Brd3	0.0759712	0.6568	0.435146	7.176	8.137	8.738	8.291	9.733	9.012
ENSMUSG00000109946.1	Brd3os	0.529973	0.0340553	0.102276	0.348	0.348	0.311	0.398	0.684	0.411
ENSMUSG00000031660.13	Brd7	-0.0260887	0.691158	0.446865	19.401	21.105	16.806	17.247	19.371	19.111
ENSMUSG00000003778.14	Brd8	0.165353	0.271944	0.277492	5.385	5.29	5.628	5.966	6.264	5.845
ENSMUSG00000057649.6	Brd9	0.0831846	0.385799	0.331682	4.496	4.851	6.094	4.981	6.165	5.135
ENSMUSG00000029279.15	Brdt	0.45118	0.0172516	0.0716405	0.985	0.624	1.116	1.428	1.198	1.133
ENSMUSG00000011158.8	Brf1	-0.0103103	0.934086	0.521551	8.142	10.116	9.399	8.574	8.98	10.021
ENSMUSG00000031487.5	Brf2	0.254642	0.0181591	0.0736537	4.106	2.894	3.82	3.809	3.557	4.404
ENSMUSG00000047843.16	Bri3	0.111314	0.374361	0.326531	33.885	29.369	30.34	28.883	39.459	31.189
ENSMUSG00000037905.13	Bri3bp	-0.00572796	0.962301	0.527958	7.06	5.392	5.777	5.847	7.282	8.344
ENSMUSG00000045744.10	Bricd5	-0.645534	0.139963	0.201424	0.388	0.416	0.095	0.236	0.095	0.095
ENSMUSG00000034329.16	Brip1	0.319582	0.210516	0.24504	0.534	0.371	0.386	0.386	0.89	0.578
ENSMUSG00000022247.12	Brix1	0.0636957	0.645537	0.431231	14.959	14.937	19.743	17.728	14.239	15.601
ENSMUSG00000033940.8	Brk1	0.0280819	0.755151	0.467287	31.863	30.121	27.409	30.177	29.946	28.817
ENSMUSG00000012076.8	Brms1l	0.33369	0.00316761	0.0272302	2.401	2.856	2.527	3.547	3.249	3.076
ENSMUSG00000046836.13	Brox	0.105028	0.460093	0.362434	10.52	12.525	14.967	14.74	13.942	13.399
ENSMUSG00000001632.16	Brpf1	0.26422	0.109401	0.17931	4.844	4.659	4.844	6.107	4.738	5.489
ENSMUSG00000035390.16	Brsk1	0.510084	0.0401919	0.110782	0.194	0.112	0.265	0.265	0.316	0.367
ENSMUSG00000063663.11	Brwd3	0.0861112	0.539863	0.392846	0.703	0.921	0.998	0.959	0.908	0.857
ENSMUSG00000071657.12	Bscl2	0.0114522	0.93231	0.52102	21.18	21.413	17.694	18.214	20.624	21.108
ENSMUSG00000040859.14	Bsdc1	0.231175	0.0336679	0.101686	22.254	29.079	26.015	29.613	26.154	27.768
ENSMUSG00000023175.15	Bsg	0.00603501	0.94604	0.524083	173.389	182.111	143.228	149.326	188.971	153.844
ENSMUSG00000028392.15	Bspry	-0.214036	0.217797	0.249159	0.193	0.181	0.349	0.169	0.241	0.157
ENSMUSG00000029082.17	Bst1	-0.00168472	0.994407	0.535891	0.25	0.304	0.39	0.242	0.234	0.164
ENSMUSG00000046718.8	Bst2	0.248199	0.334061	0.307916	127.393	140.392	125.096	129.481	242.228	106.312
ENSMUSG00000025103.8	Btbd1	-0.032376	0.715681	0.454596	19.478	20.899	23.538	22.881	20.994	20.337
ENSMUSG00000038187.14	Btbd10	0.184234	0.229899	0.255621	1.818	2.059	1.894	2.209	2.525	1.668
ENSMUSG00000020042.15	Btbd11	-0.205714	0.558673	0.399496	0.337	0.198	0.406	0.238	0.505	0.159
ENSMUSG00000073771.11	Btbd19	-0.10642	0.753807	0.466814	0.754	3.997	1.131	1.273	1.334	1.075
ENSMUSG00000003344.14	Btbd2	-0.0568644	0.637984	0.428671	9.576	9.825	9.676	8.819	10.98	8.483
ENSMUSG00000062098.11	Btbd3	0.381708	0.0582147	0.133079	1.561	1.542	2.114	2.571	2.361	2.38
ENSMUSG00000002803.14	Btbd6	0.255255	0.00544511	0.0372076	5.503	6.253	4.877	6.818	6.781	6.142
ENSMUSG00000041702.7	Btbd7	-0.0144398	0.921525	0.51807	2.138	2.568	2.541	2.676	2.286	2.38
ENSMUSG00000082361.6	Btc	0.745468	0.00683602	0.0422295	0.995	1.186	1.503	1.863	3.092	1.736
ENSMUSG00000021900.10	Btd	-0.0466955	0.548965	0.396144	34.057	39.376	36.681	32.37	34.197	35.65
ENSMUSG00000021660.14	Btf3	-0.0947894	0.121876	0.188456	112.065	106.877	101.648	96.862	98.326	95.6
ENSMUSG00000028568.16	Btf3l4	0.10689	0.27681	0.279948	28.158	32.006	33.401	30.31	34.497	34.653
ENSMUSG00000036478.8	Btg1	0.115746	0.540273	0.392938	22.501	27.798	29.191	26.296	30.119	29.71
ENSMUSG00000020423.6	Btg2	-0.0172472	0.970652	0.530023	4.131	18.553	10.123	7.049	14.15	7.042
ENSMUSG00000031264.13	Btk	0.146062	0.694269	0.447878	0.478	0.349	0.633	0.439	1.317	0.387
ENSMUSG00000040283.14	Btnl9	0.26419	0.238198	0.259859	1.754	0.937	2.169	2.209	2.343	1.58
ENSMUSG00000025217.15	Btrc	0.0374591	0.752862	0.466555	6.461	5.559	6.251	6.19	7.122	6.13
ENSMUSG00000027379.13	Bub1	0.565649	0.0544333	0.128942	0.125	0.113	0.193	0.193	0.363	0.249
ENSMUSG00000040084.9	Bub1b	0.255371	0.377814	0.327891	0.25	0.262	0.387	0.287	0.599	0.399
ENSMUSG00000066979.6	Bub3	0.157113	0.294782	0.289071	16.159	17.683	18.055	21.254	18.741	19.416
ENSMUSG00000032077.5	Bud13	0.287776	0.034136	0.102368	3.617	4.11	2.253	4.13	3.501	4.458
ENSMUSG00000005378.17	Bud23	-0.162484	0.057058	0.131788	19.413	20.54	20.211	15.652	19.503	19.388
ENSMUSG00000038722.17	Bud31	-0.0629291	0.517235	0.384914	38.436	41.69	36.753	38.222	33.553	35.736
ENSMUSG00000023988.8	Bysl	0.00111174	0.993041	0.535552	4.24	4.523	4.095	4.654	3.681	4.813
ENSMUSG00000051223.14	Bzw1	0.0999944	0.574318	0.405746	39.475	48.047	54.599	54.94	48.186	47.226
ENSMUSG00000020547.5	Bzw2	0.0180268	0.876114	0.505182	3.626	2.911	3.251	3.181	3.016	3.974
ENSMUSG00000052477.15	C130026I21Rik	0.376569	0.370509	0.32475	1.6	0.654	2.081	1.273	3.956	1.359
ENSMUSG00000044092.8	C130050O18Rik	0.280793	0.314541	0.298746	0.157	0.303	0.339	0.194	0.327	0.266
ENSMUSG00000039349.5	C130074G19Rik	0.0959932	0.356138	0.317724	57.142	64.686	53.9	54.515	68.374	61.85
ENSMUSG00000000581.8	C1d	0.0998202	0.304576	0.293961	25.853	28.6	30.484	28.72	28.349	28.396
ENSMUSG00000042460.5	C1galt1	0.0570232	0.735534	0.460716	9.677	12.061	12.181	13.019	10.947	10.552
ENSMUSG00000048970.9	C1galt1c1	0.0358745	0.81706	0.487325	18.055	21.302	22.261	22.359	18.116	19.223
ENSMUSG00000036887.5	C1qa	0.0985871	0.812376	0.485864	24.563	14.483	31.036	20.198	57.257	15.841
ENSMUSG00000036905.8	C1qb	0.0710349	0.873844	0.504541	20.769	11.823	25.563	15.538	49.004	12.302
ENSMUSG00000018446.8	C1qbp	-0.0118749	0.929277	0.520175	56.887	49.572	49.752	39.313	59.831	54.991
ENSMUSG00000036896.5	C1qc	0.195654	0.643096	0.430409	23.676	14.785	29.157	19.253	60.992	15.957
ENSMUSG00000049630.6	C1ql3	0.0553055	0.724176	0.457129	0.255	0.215	0.349	0.362	0.241	0.255
ENSMUSG00000017446.14	C1qtnf1	0.352051	0.216471	0.248265	5.174	2.311	5.806	8.591	6.498	4.345
ENSMUSG00000023571.4	C1qtnf12	-0.189785	0.294891	0.289148	2.188	2.801	1.31	1.431	1.9	1.56
ENSMUSG00000046491.10	C1qtnf2	0.186892	0.475649	0.369031	0.626	0.411	0.462	0.441	0.872	0.677
ENSMUSG00000079592.9	C1qtnf5	0.359971	0.207864	0.243649	1.979	0.965	1.516	1.91	2.944	1.575
ENSMUSG00000061535.11	C1qtnf7	0.848466	0.0142374	0.0644681	0.476	0.197	0.592	1.079	0.835	0.429
ENSMUSG00000071347.3	C1qtnf9	-0.187253	0.366468	0.322666	0.294	0.285	0.413	0.432	0.294	0.266
ENSMUSG00000055172.10	C1ra	-0.0225716	0.81045	0.485387	132.116	139.728	149.947	136.162	137.913	122.676
ENSMUSG00000038527.9	C1rl	0.0589	0.484334	0.372407	69.69	68.573	56.916	57.981	68.882	72.451
ENSMUSG00000038521.17	C1s1	0.28798	0.078208	0.153703	273.343	296.417	340.28	382.866	390.915	316.651
ENSMUSG00000024371.14	C2	-0.25992	0.103489	0.175291	31.309	35.712	32.451	24.224	35.389	25.035
ENSMUSG00000032120.11	C2cd2l	0.631412	0.0219143	0.081226	20.399	30.952	29.935	55.492	32.558	37.614
ENSMUSG00000047248.20	C2cd3	0.268669	0.093111	0.167049	4.438	4.129	4.151	4.055	4.417	4.353
ENSMUSG00000091648.2	C2cd4d	-0.0623247	0.770251	0.472615	0.689	0.361	0.568	0.437	0.393	0.7
ENSMUSG00000030279.15	C2cd5	0.657207	0.0168082	0.0707402	2.258	2.428	2.443	4.717	3.418	4.083
ENSMUSG00000024164.15	C3	-0.151073	0.238857	0.260231	1699.72	3064.09	2044.82	1733.95	1949.4	2188.5
ENSMUSG00000006423.15	C330007P06Rik	0.139742	0.410721	0.343179	12.266	13.04	16.259	15.851	14.52	14.602
ENSMUSG00000024592.15	C330018D20Rik	0.191151	0.042243	0.113684	5.608	5.237	6.155	6.417	7.008	6.439
ENSMUSG00000065952.13	C330021F23Rik	-0.0610213	0.867138	0.502479	3.413	3.508	2.888	1.289	4.535	2.602
ENSMUSG00000033031.13	C330027C09Rik	0.568197	0.0193324	0.0761404	0.444	0.52	0.545	0.444	0.786	0.735
ENSMUSG00000040552.8	C3ar1	0.531915	0.233919	0.257792	0.54	0.384	0.901	0.696	1.897	0.468
ENSMUSG00000073418.4	C4b	-0.144947	0.540246	0.392938	204.49	389.276	185.401	154.568	235.124	223.04
ENSMUSG00000026405.14	C4bp	0.0353665	0.739727	0.46208	287.916	383.277	318.202	328.637	327.169	303.241
ENSMUSG00000049130.6	C5ar1	0.170678	0.659688	0.436159	0.424	0.219	0.711	0.348	1.135	0.348
ENSMUSG00000074361.10	C5ar2	0.270516	0.285606	0.284506	0.431	0.333	0.499	0.578	0.803	0.382
ENSMUSG00000022181.16	C6	-0.0461864	0.633282	0.427083	70.265	78.92	74.608	82.854	63.912	68.153
ENSMUSG00000079105.4	C7	0.405858	0.387638	0.332548	1.07	0.475	1.505	2.753	1.624	0.872
ENSMUSG00000079242.2	C730034F03Rik	0.113633	0.249302	0.265845	1.26	1.148	0.994	1.246	1.12	1.372
ENSMUSG00000050390.12	C77080	0.278694	0.127148	0.192015	18.787	26.611	22.662	26.987	30.636	21.535
ENSMUSG00000046679.16	C87436	0.266371	0.00561342	0.0378815	4.914	5.676	6.377	7.448	6.315	6.758
ENSMUSG00000035031.15	C8a	-0.381386	0.00810616	0.0466177	173.847	266.9	166.477	139.603	133.753	161.95
ENSMUSG00000029656.13	C8b	-0.859477	9.83308e-05	0.00341805	78.879	95.035	95.365	47.971	40.815	62.596
ENSMUSG00000015083.11	C8g	-0.25215	0.0694044	0.145157	268.937	263.504	229.364	189.492	217.685	234.456
ENSMUSG00000022149.17	C9	-0.303318	0.059189	0.13413	182.258	292.859	183.024	130.706	187.626	187.308
ENSMUSG00000063897.3	CAAA01118383.1	-0.19309	0.146273	0.205647	5.665	5.751	4.426	5.007	5.187	4.52
ENSMUSG00000099077.4	CAAA01125382.1	0.0946531	0.356507	0.317834	8.301	8.472	6.347	9.516	8.89	7.476
ENSMUSG00000095742.1	CAAA01147332.1	-0.196987	0.303231	0.293304	20.445	16.863	14.919	14.242	19.382	12.856
ENSMUSG00000098810.7	CAAA01180111.1	0.310673	0.0939503	0.167631	6.068	6.609	8.759	8.466	10.09	8.583
ENSMUSG00000028578.8	Caap1	0.0589093	0.658275	0.435764	2.291	2.54	3.055	2.963	2.172	2.788
ENSMUSG00000036707.16	Cab39	0.0992718	0.455152	0.360626	18.937	22.099	24.332	25.732	22.002	22.811
ENSMUSG00000021981.10	Cab39l	-0.0258177	0.659459	0.436048	21.045	19.696	23.274	21.422	20.942	19.971
ENSMUSG00000019945.10	Cabcoco1	-0.164162	0.374923	0.3267	1.922	1.411	1.084	0.859	1.247	1.411
ENSMUSG00000020196.10	Cabin1	0.297967	0.0456598	0.117992	3.34	2.742	3.6	4.119	3.093	3.769
ENSMUSG00000040957.15	Cables1	0.681097	0.0107052	0.0549449	0.502	0.38	0.312	0.692	1.059	0.584
ENSMUSG00000038990.14	Cables2	-0.045248	0.720048	0.455979	10.468	14.812	11.395	12.814	10.642	11.366
ENSMUSG00000029544.16	Cabp1	-0.115141	0.665249	0.438074	0.278	0.311	0.236	0.345	0.295	0.16
ENSMUSG00000024857.16	Cabp2	0.111458	0.735817	0.460761	0.126	0.217	0.14	0.105	0.189	0.119
ENSMUSG00000015488.14	Cacfd1	0.288011	0.040528	0.11129	11.471	12.762	10.04	17.207	11.111	13.544
ENSMUSG00000028532.14	Cachd1	0.589738	0.166008	0.218306	0.343	0.281	0.53	0.515	1.341	0.842
ENSMUSG00000034656.17	Cacna1a	0.868302	0.014346	0.0647053	0.466	0.691	0.273	1.141	0.579	1.029
ENSMUSG00000015968.17	Cacna1d	-0.272925	0.0344513	0.102789	1.486	1.609	1.204	1.063	1.195	1.214
ENSMUSG00000026407.17	Cacna1s	-0.36936	0.616529	0.420915	0.123	0.123	0.094	0.123	0.311	0.16
ENSMUSG00000040118.15	Cacna2d1	-0.0305626	0.919378	0.517506	0.277	0.253	0.385	0.494	0.482	0.277
ENSMUSG00000020882.17	Cacnb1	-0.230157	0.483847	0.372186	0.415	0.308	0.295	0.348	0.523	0.308
ENSMUSG00000020722.5	Cacng1	-0.505336	0.259301	0.270846	0.112	0.112	0.146	0.112	0.135	0.112
ENSMUSG00000069806.5	Cacng7	0.64035	0.00313368	0.027076	0.23	0.46	0.376	0.521	0.497	0.473
ENSMUSG00000096998.3	Cacng7	0.64035	0.00313368	0.027076	0.23	0.46	0.376	0.521	0.497	0.473
ENSMUSG00000034889.8	Cactin	0.0656052	0.531415	0.38987	5.767	6.571	5.112	7.421	5.204	6.169
ENSMUSG00000014226.10	Cacybp	-0.0678427	0.710236	0.45285	17.504	21.465	19.045	23.979	15.011	15.328
ENSMUSG00000013629.16	Cad	0.336918	0.26854	0.275962	3.681	5.715	4.714	9.406	4.24	4.897
ENSMUSG00000032076.19	Cadm1	0.22531	0.158539	0.214199	8.841	8.2	11.047	11.763	13.855	9.124
ENSMUSG00000005338.13	Cadm3	-0.0804727	0.681711	0.443745	2.228	0.818	1.564	1.327	1.896	1.244
ENSMUSG00000054793.8	Cadm4	-0.45906	0.078996	0.154459	1.972	3.281	2.144	1.771	1.102	2.587
ENSMUSG00000017978.18	Cadps2	-0.156298	0.199933	0.239152	4.401	5.854	4.281	3.654	3.813	5.028
ENSMUSG00000044566.15	Cage1	0.0130642	0.938931	0.522557	0.284	0.432	0.296	0.346	0.272	0.432
ENSMUSG00000059588.13	Calcrl	-0.00646402	0.980499	0.532421	3.835	1.59	4.132	3.359	4.563	3.255
ENSMUSG00000029761.16	Cald1	0.0196802	0.859426	0.500073	81.296	81.12	101.602	89.961	94.682	87.864
ENSMUSG00000033033.10	Calhm2	0.17573	0.529071	0.388942	0.673	0.475	0.541	0.659	1.306	0.488
ENSMUSG00000001175.14	Calm1	0.0958818	0.384914	0.33128	82.656	87.062	85.402	103.168	103.689	88.224
ENSMUSG00000019370.10	Calm3	0.128621	0.150054	0.208462	35.92	27.292	29.466	36.012	41.386	29.637
ENSMUSG00000032246.14	Calml4	0.417019	0.167109	0.219011	1.237	0.611	0.743	1.178	1.399	0.618
ENSMUSG00000060371.12	Caln1	-0.343521	0.0347974	0.103025	1.806	1.399	1.66	1.096	1.106	1.378
ENSMUSG00000003814.8	Calr	-0.0220772	0.826247	0.490369	520.31	592.1	478.644	596.987	465.947	442.781
ENSMUSG00000019732.14	Calr3	0.0656737	0.501985	0.378998	1.817	1.316	1.11	1.355	1.591	1.345
ENSMUSG00000029767.16	Calu	0.0716441	0.609282	0.418409	36.455	43.333	42.838	49.575	40.567	39.684
ENSMUSG00000030272.15	Camk1	0.108424	0.207932	0.243659	9.287	8.556	8.48	9.914	11.044	9.116
ENSMUSG00000039145.16	Camk1d	-0.33045	0.167869	0.219412	16.809	18.779	20.696	11.091	18.001	16.067
ENSMUSG00000024617.16	Camk2a	-0.280657	0.418636	0.346458	0.134	0.122	0.147	0.159	0.134	0.159
ENSMUSG00000057897.14	Camk2b	-0.248761	0.19011	0.233393	2.481	2.304	2.119	1.757	1.986	2.057
ENSMUSG00000053819.16	Camk2d	-0.168138	0.388726	0.332976	2.219	2.815	2.583	1.623	2.831	2.517
ENSMUSG00000021820.18	Camk2g	0.160901	0.236942	0.259326	3.628	4.114	3.697	3.819	5.45	4.981
ENSMUSG00000046447.3	Camk2n1	-0.0708897	0.184887	0.229992	11.975	15.31	11.926	13.211	12.093	11.622
ENSMUSG00000051146.2	Camk2n2	0.0282712	0.877963	0.50571	1.452	1.435	0.595	1.478	1.067	0.997
ENSMUSG00000020785.17	Camkk1	0.254496	0.154427	0.211439	0.224	0.224	0.298	0.248	0.398	0.236
ENSMUSG00000029471.13	Camkk2	-0.132005	0.539167	0.39253	2.53	3.266	4.146	2.296	2.887	4.035
ENSMUSG00000021501.4	Caml	0.0410451	0.52707	0.388204	13.135	14.966	12.455	14.722	11.905	12.298
ENSMUSG00000026933.17	Camsap1	-0.225166	0.490805	0.374778	2.567	4.636	5.859	7.067	3.503	2.703
ENSMUSG00000041570.14	Camsap2	-0.023925	0.869494	0.503301	3.217	3.892	4.167	4.053	3.309	3.709
ENSMUSG00000044433.16	Camsap3	0.137979	0.386548	0.331981	6.666	5.49	4.394	4.773	6.726	5.71
ENSMUSG00000014592.20	Camta1	-0.15955	0.33902	0.310011	4.285	7	5.46	3.302	4.457	4.599
ENSMUSG00000040712.16	Camta2	0.103375	0.525498	0.387682	9.366	12.481	10.478	10.64	12.522	10.539
ENSMUSG00000020114.12	Cand1	0.0611255	0.690781	0.446725	10.203	11.183	14.679	12.509	11.107	12.855
ENSMUSG00000025575.14	Cant1	0.105021	0.259321	0.270846	10.131	11.965	8.922	12.718	11.469	9.933
ENSMUSG00000020368.15	Canx	0.0314711	0.827202	0.490608	112.649	143.203	147.15	160.827	122.631	126.406
ENSMUSG00000028656.14	Cap1	0.150714	0.0987784	0.171407	25.752	27.596	32.135	30.433	37.613	28.261
ENSMUSG00000021373.16	Cap2	0.1761	0.692404	0.447318	0.242	0.212	0.227	0.272	0.469	0.453
ENSMUSG00000056737.14	Capg	0.337199	0.467907	0.365701	1.539	0.631	2.019	1.782	4.418	1.026
ENSMUSG00000026270.11	Capn10	0.109982	0.14303	0.203561	9.165	9.308	9.88	9.773	9.082	9.463
ENSMUSG00000058626.16	Capn11	-0.705086	0.0781011	0.153642	0.156	0.269	0.835	0.175	0.236	0.099
ENSMUSG00000037326.10	Capn15	0.102421	0.533012	0.390469	6.691	6.926	7.347	8.757	6.729	6.84
ENSMUSG00000026509.15	Capn2	0.119277	0.16932	0.22019	21.836	18.976	25.241	22.339	25.701	20.622
ENSMUSG00000079110.11	Capn3	0.22854	0.313793	0.298461	0.718	0.751	1.077	0.832	1.224	0.8
ENSMUSG00000035547.14	Capn5	0.0288434	0.885671	0.508093	1.169	0.859	1.169	1.014	1.564	0.928
ENSMUSG00000067276.5	Capn6	0.594533	0.170872	0.221165	0.585	0.309	0.894	0.975	1.187	0.439
ENSMUSG00000021893.14	Capn7	-0.0089802	0.942713	0.523369	11.444	14.187	13.717	13.768	12.574	13.171
ENSMUSG00000038599.14	Capn8	0.29154	0.0680863	0.143662	1.136	1.347	1.06	1.309	1.228	1.687
ENSMUSG00000001794.13	Capns1	0.228172	0.087426	0.16193	75.979	73.53	65.893	81.485	106.247	73.128
ENSMUSG00000027184.14	Caprin1	-0.122102	0.373784	0.326308	73.2	76.94	80.471	66.079	80.217	70.343
ENSMUSG00000030309.16	Caprin2	0.190006	0.430574	0.35135	1.075	0.689	0.882	1.28	0.797	0.701
ENSMUSG00000039676.4	Capsl	0.0706973	0.722844	0.456774	0.206	0.215	0.234	0.234	0.243	0.14
ENSMUSG00000070372.11	Capza1	0.135849	0.356821	0.317961	13.508	12.707	16.015	16.656	15.66	13.874
ENSMUSG00000015733.13	Capza2	0.016648	0.854398	0.498742	36.661	36.582	42.044	40.744	38.919	36.293
ENSMUSG00000028745.18	Capzb	0.0616996	0.400969	0.338798	49.176	49.296	45.806	50.987	57.792	48.989
ENSMUSG00000027556.15	Car1	-0.345636	0.0179521	0.0732086	4.481	2.829	3.254	2.356	2.693	3.31
ENSMUSG00000003273.14	Car11	0.19425	0.556467	0.398734	0.906	1.152	1.424	2.317	0.958	1.152
ENSMUSG00000027555.8	Car13	0.591534	0.103477	0.175287	0.262	0.276	0.262	0.378	0.843	0.276
ENSMUSG00000038526.14	Car14	-0.548765	0.0205477	0.0783871	25.816	19.002	24.291	10.282	19.457	20.183
ENSMUSG00000027562.12	Car2	0.665232	0.0876237	0.162093	2.164	2.151	3.43	3.226	6.48	2.042
ENSMUSG00000027559.5	Car3	0.115015	0.510009	0.382166	3535.99	1485.78	2597.78	2557.94	2601.59	2818.6
ENSMUSG00000025317.7	Car5a	-0.243425	0.0805137	0.156074	50.899	42.422	46.667	33.753	40.947	45.635
ENSMUSG00000031373.4	Car5b	0.206314	0.0224007	0.0820798	1.721	1.553	1.903	1.749	1.931	2.141
ENSMUSG00000031883.13	Car7	0.278169	0.00714844	0.0433521	0.746	0.791	0.576	0.802	0.961	0.848
ENSMUSG00000041261.9	Car8	-0.0625313	0.578147	0.407069	30.943	23.879	26.298	27.358	27.235	25.327
ENSMUSG00000028463.14	Car9	-0.166124	0.633905	0.427327	0.156	0.125	0.937	0.229	0.187	0.26
ENSMUSG00000033170.14	Card10	0.61038	0.00372249	0.029918	3.372	3.203	3.169	6.558	5.186	4.694
ENSMUSG00000036526.8	Card11	0.526833	0.209522	0.244488	0.231	0.187	0.285	0.329	0.637	0.176
ENSMUSG00000037960.11	Card19	0.00465232	0.97025	0.529956	7.818	7.99	6.936	8.54	9.996	7.165
ENSMUSG00000041849.7	Card6	0.437759	0.0180615	0.073432	2.718	3.014	3.698	5.084	3.42	3.809
ENSMUSG00000026928.14	Card9	0.583371	0.048354	0.121388	0.548	0.346	0.322	0.362	0.918	0.499
ENSMUSG00000026017.13	Carf	0.0966527	0.687864	0.445723	0.914	1.116	1.385	1.264	1.479	1.156
ENSMUSG00000032185.15	Carm1	0.124572	0.322143	0.302565	10.094	12.869	12.671	9.829	11.399	13.067
ENSMUSG00000021338.17	Carmil1	-0.411443	0.056558	0.131144	8.945	12.902	13.905	5.736	9.413	9.546
ENSMUSG00000050357.9	Carmil2	0.304432	0.0996787	0.172251	0.289	0.3	0.222	0.489	0.378	0.267
ENSMUSG00000010755.17	Cars	-0.0403852	0.791725	0.479789	14.982	20.237	13.194	20.31	13.429	14.393
ENSMUSG00000056228.10	Cars2	0.178986	0.0284164	0.0932613	8.037	6.969	7.432	9.74	8.162	7.668
ENSMUSG00000078676.9	Casc3	0.0114607	0.910193	0.515326	7.451	7.76	7.927	8.636	7.708	7.386
ENSMUSG00000060227.15	Casc4	0.71981	0.0164859	0.0699217	1.842	2.539	2.121	4.687	3.237	2.595
ENSMUSG00000015189.12	Casd1	-0.0807728	0.736696	0.460913	13.573	14.102	17.86	15.215	11.53	14.102
ENSMUSG00000031012.17	Cask	0.0348789	0.861401	0.500605	4.48	7.033	7.544	7.339	5.122	5.224
ENSMUSG00000034471.12	Caskin2	0.134728	0.262384	0.272642	3.61	4.178	3.763	4.897	4.579	3.79
ENSMUSG00000025888.5	Casp1	0.979537	0.0785194	0.153912	1.366	0.857	1.639	1.962	7.724	1.316
ENSMUSG00000025887.10	Casp12	1.05485	0.107968	0.178411	1.282	0.772	1.579	2.09	8.275	0.985
ENSMUSG00000029863.13	Casp2	0.514578	0.00635215	0.0406117	2.414	2.082	2.635	3.521	3.676	3.344
ENSMUSG00000031628.9	Casp3	-0.144739	0.169123	0.220155	14.175	14.523	16.582	12.559	15.679	13.098
ENSMUSG00000033538.13	Casp4	0.667728	0.122783	0.189065	0.897	0.792	0.994	1.031	3.407	0.934
ENSMUSG00000027997.9	Casp6	0.0349907	0.811487	0.485629	20.289	20.614	19.563	22.909	24.171	17.516
ENSMUSG00000026029.14	Casp8	0.18231	0.0529977	0.127246	12.469	17.005	14.227	16.403	14.905	15.909
ENSMUSG00000028282.12	Casp8ap2	0.0586414	0.629223	0.425607	1.198	0.93	1.064	1.266	0.952	0.93
ENSMUSG00000028914.13	Casp9	0.0326603	0.82644	0.490394	9.808	7.219	5.998	7.662	7.93	6.279
ENSMUSG00000007122.11	Casq1	-0.529435	0.544754	0.394476	0.283	0.565	0.217	0.522	0.283	0.435
ENSMUSG00000027861.13	Casq2	-0.892471	0.167863	0.219412	0.254	0.204	0.216	0.28	0.191	0.14
ENSMUSG00000028977.16	Casz1	0.477401	0.00123671	0.0155846	0.184	0.237	0.303	0.356	0.369	0.329
ENSMUSG00000027187.10	Cat	0.082205	0.55574	0.398491	1584.15	1488.41	1644.39	1538.71	2058.49	1550.15
ENSMUSG00000033486.14	Catsper2	0.123345	0.333243	0.307683	1.872	1.853	1.709	1.584	2.353	1.892
ENSMUSG00000049676.14	Catsperg1	0.405518	0.00397901	0.0312357	0.3	0.237	0.269	0.364	0.364	0.474
ENSMUSG00000007655.16	Cav1	0.723337	0.113594	0.182513	2.89	1.725	2.582	5.575	8.134	2.445
ENSMUSG00000000058.6	Cav2	0.139599	0.461414	0.362928	2.236	2.303	2.99	3.273	3.569	2.68
ENSMUSG00000062694.7	Cav3	-0.470026	0.322939	0.302923	0.095	0.095	0.151	0.113	0.142	0.113
ENSMUSG00000004044.9	Cavin1	0.185885	0.46185	0.363164	3.496	1.201	3.092	3.58	3.259	2.283
ENSMUSG00000045954.7	Cavin2	0.102032	0.73241	0.459673	7.097	1.906	7.653	7.037	5.927	5.777
ENSMUSG00000037060.3	Cavin3	0.0237431	0.931219	0.520798	0.481	0.247	0.389	0.629	0.475	0.265
ENSMUSG00000028348.7	Cavin4	-0.598756	0.259327	0.270846	0.118	0.118	0.118	0.154	0.118	0.118
ENSMUSG00000035640.18	Cbarp	0.207012	0.303425	0.29337	1.006	1.006	0.823	1.498	0.96	0.777
ENSMUSG00000038533.15	Cbfa2t2	0.12531	0.498803	0.377741	1.964	2.368	3.636	3.455	2.884	2.8
ENSMUSG00000006362.16	Cbfa2t3	0.420985	0.0609869	0.136108	0.789	0.499	0.935	1.309	1.454	0.852
ENSMUSG00000031885.14	Cbfb	-0.261269	0.189212	0.232713	7.252	9.657	9.217	7.878	6.373	5.943
ENSMUSG00000034342.9	Cbl	0.000438991	0.998167	0.536896	1.104	1.173	1.104	1.045	1.341	0.937
ENSMUSG00000022637.11	Cblb	0.412292	0.0351193	0.103452	1.166	1.784	1.441	2.727	1.647	1.698
ENSMUSG00000040525.13	Cblc	0.0166552	0.919257	0.517506	13.767	14.554	13.181	12.157	15.477	13.156
ENSMUSG00000020659.16	Cbll1	-0.0043882	0.975789	0.531314	2.626	3.175	3.056	3.307	2.566	2.722
ENSMUSG00000040380.14	Cbln3	-0.168905	0.217108	0.248631	0.825	0.782	0.529	0.571	0.634	0.634
ENSMUSG00000025150.10	Cbr2	-0.634178	0.125634	0.191011	0.341	0.079	0.19	0.182	0.127	0.167
ENSMUSG00000031641.14	Cbr4	-0.00805285	0.922675	0.518448	30.604	23.964	29.971	22.384	29.305	27.362
ENSMUSG00000018666.13	Cbx1	0.13583	0.04609	0.11859	14.872	14.984	15.185	17.477	15.999	15.373
ENSMUSG00000025577.7	Cbx2	0.72644	0.000558865	0.00979154	2.846	2.332	3.312	5.575	4.688	4.478
ENSMUSG00000029836.15	Cbx3	-0.063604	0.588109	0.410569	28.842	32.39	28.468	32.015	26.819	24.758
ENSMUSG00000039989.7	Cbx4	0.520629	0.11774	0.185614	7.361	7.959	9.888	12.468	16.162	10.893
ENSMUSG00000009575.14	Cbx5	-0.0284659	0.83574	0.492976	3.63	3.932	4.212	4.201	3.243	3.835
ENSMUSG00000053411.16	Cbx7	0.238349	0.0986312	0.171264	3.426	3.879	3.476	4.333	4.761	3.879
ENSMUSG00000025578.9	Cbx8	0.366308	0.043118	0.114783	3.932	2.787	2.22	3.157	5.377	3.03
ENSMUSG00000036686.16	Cc2d1a	0.28756	0.00500699	0.0356451	4	4.819	3.475	5.449	5.145	4.441
ENSMUSG00000028582.14	Cc2d1b	0.179772	0.294267	0.288795	6.606	7.481	6.796	5.563	10.935	6.942
ENSMUSG00000039765.15	Cc2d2a	0.33278	0.201252	0.239808	0.628	0.572	0.886	0.628	1.293	0.905
ENSMUSG00000020074.7	Ccar1	0.185887	0.28379	0.283519	11.113	14.526	14.031	17.075	15.085	13.915
ENSMUSG00000033712.6	Ccar2	0.129488	0.194803	0.235942	6.927	5.975	7.151	6.983	7.822	7.612
ENSMUSG00000063605.5	Ccdc102a	0.333329	0.12653	0.191525	0.61	0.23	0.541	0.61	0.599	0.403
ENSMUSG00000028461.12	Ccdc107	-0.205348	0.114844	0.183427	36.969	35.106	31.017	28.483	30.733	32.928
ENSMUSG00000042111.9	Ccdc115	0.313389	0.000240806	0.00591897	6.176	5.232	5.855	7.513	6.212	7.211
ENSMUSG00000020482.4	Ccdc117	-0.398661	0.0328569	0.100724	9.582	15.619	11.641	10.074	8.216	9.964
ENSMUSG00000019659.8	Ccdc12	0.0045251	0.97108	0.530137	19.038	15.778	15.833	14.725	18.095	15.513
ENSMUSG00000031150.13	Ccdc120	1.31808	0.0111963	0.0563276	0.452	0.529	0.43	1.335	2.57	0.684
ENSMUSG00000034795.14	Ccdc122	0.272954	0.175282	0.224001	4.25	4.732	5.341	3.754	7.905	5.327
ENSMUSG00000007721.6	Ccdc124	-0.053243	0.699471	0.449375	12.143	11.049	9.273	10.367	10.583	10.53
ENSMUSG00000048924.14	Ccdc125	0.271478	0.0259277	0.0888212	2.205	2.031	2.928	3.152	3.164	2.542
ENSMUSG00000050786.8	Ccdc126	0.175335	0.314941	0.298952	0.794	0.767	1.184	1.278	1.063	0.767
ENSMUSG00000021578.17	Ccdc127	0.15629	0.551415	0.396814	8.394	10.908	11.626	16.122	8.992	10.349
ENSMUSG00000004994.12	Ccdc130	0.267875	0.0359508	0.104665	3.666	4.299	3.543	4.914	3.71	4
ENSMUSG00000049957.14	Ccdc137	-0.0123724	0.925776	0.519266	5.348	5.303	6.624	6.952	5.458	5.485
ENSMUSG00000038010.9	Ccdc138	-0.0848057	0.533304	0.390567	1.772	1.885	1.417	1.247	1.757	1.672
ENSMUSG00000044033.16	Ccdc141	-0.0524782	0.627365	0.424982	2.58	2.885	2.774	2.899	2.497	2.524
ENSMUSG00000107499.1	Ccdc142	-0.247847	0.153401	0.210774	1.477	1.404	1.492	1.316	1.375	0.907
ENSMUSG00000036641.9	Ccdc148	0.0356428	0.858347	0.499772	1.048	1.107	1.009	0.712	1.266	0.969
ENSMUSG00000045790.10	Ccdc149	0.579058	0.0971464	0.170407	0.79	1.597	0.97	2.765	0.902	1.606
ENSMUSG00000034303.7	Ccdc15	0.0876549	0.458256	0.361777	0.225	0.296	0.355	0.225	0.296	0.331
ENSMUSG00000039632.13	Ccdc151	-0.0904403	0.659984	0.436281	1.575	1.154	1.054	0.856	1.6	1.638
ENSMUSG00000091119.2	Ccdc152	-0.398958	0.191071	0.233883	1.736	1.237	1.101	1.129	1.303	1.215
ENSMUSG00000051427.14	Ccdc157	0.402615	0.0167283	0.0705404	3.982	5.103	4.895	6.983	6.513	5.628
ENSMUSG00000050050.17	Ccdc158	0.342738	0.171531	0.221513	0.307	0.644	0.512	0.805	0.527	0.761
ENSMUSG00000006241.16	Ccdc159	0.0781806	0.638182	0.428716	4.612	6.088	7.157	6.468	6.637	5.695
ENSMUSG00000073207.1	Ccdc160	0.226402	0.268665	0.276018	0.438	0.142	0.249	0.284	0.331	0.249
ENSMUSG00000075225.14	Ccdc162	-0.0859847	0.420511	0.347179	6.385	5.555	5.493	5.211	6.164	4.716
ENSMUSG00000028689.14	Ccdc163	0.128274	0.167861	0.219412	4.626	4.107	3.531	4.902	3.839	4.732
ENSMUSG00000034035.18	Ccdc17	-0.00491681	0.970091	0.529937	2.578	1.763	2.98	2.186	2.629	2.568
ENSMUSG00000070883.3	Ccdc173	0.4914	0.0107851	0.0552243	0.375	0.331	0.419	0.552	0.375	0.453
ENSMUSG00000034083.16	Ccdc174	0.0887264	0.271845	0.277449	5.164	5.191	4.637	6.289	5.489	4.69
ENSMUSG00000026578.6	Ccdc181	0.253955	0.0221183	0.0816063	2.083	2.135	1.885	2.323	2.854	2.177
ENSMUSG00000035173.14	Ccdc186	0.234436	0.190495	0.233572	1.416	1.827	2.01	2.535	2.01	2.01
ENSMUSG00000057176.4	Ccdc189	0.292134	0.185824	0.230563	0.839	0.629	0.619	1.019	1.259	0.989
ENSMUSG00000031143.4	Ccdc22	-0.0116081	0.836537	0.493245	5.399	5.704	5.196	5.477	5.743	5.001
ENSMUSG00000078588.10	Ccdc24	-0.422921	0.329045	0.305638	0.165	0.231	0.187	0.116	0.249	0.107
ENSMUSG00000022035.6	Ccdc25	0.111582	0.352842	0.316377	24.572	23.096	24.028	25.733	22.081	27.413
ENSMUSG00000059554.12	Ccdc28a	0.444291	0.0202751	0.0778507	7.796	7.212	5.504	6.563	11.581	7.937
ENSMUSG00000028795.15	Ccdc28b	-0.243226	0.0811388	0.156566	2.768	3.786	2.864	2.922	2.812	2.827
ENSMUSG00000026676.7	Ccdc3	0.492034	0.274754	0.278817	1.542	0.502	1.189	2.117	1.987	0.669
ENSMUSG00000028637.15	Ccdc30	-0.196038	0.412046	0.343597	6.969	2.107	2.546	2.949	2.844	2.546
ENSMUSG00000039983.13	Ccdc32	0.505621	6.27899e-06	0.00065859	3.247	2.593	2.926	4.222	4.259	4.037
ENSMUSG00000027160.16	Ccdc34	0.305167	0.18026	0.226999	0.754	0.58	0.754	0.719	1.16	0.789
ENSMUSG00000036168.15	Ccdc38	0.0375008	0.576288	0.406478	0.278	0.265	0.252	0.265	0.265	0.291
ENSMUSG00000027676.11	Ccdc39	0.077742	0.659405	0.436048	0.307	0.225	0.286	0.317	0.286	0.266
ENSMUSG00000020925.16	Ccdc43	0.0684608	0.419318	0.346706	6.95	7.161	7.477	8.553	6.962	7.629
ENSMUSG00000078622.8	Ccdc47	0.0511037	0.760125	0.469078	46.689	51.978	52.182	53.621	48.848	54.005
ENSMUSG00000038127.14	Ccdc50	-0.0608235	0.682643	0.444047	7.217	7.879	8.846	8.095	8.057	7.128
ENSMUSG00000025645.8	Ccdc51	0.382604	2.49805e-06	0.00036213	5.991	5.453	5.137	7.288	6.898	7.394
ENSMUSG00000048445.6	Ccdc57	0.624075	0.00262683	0.0243639	0.88	1.016	0.561	1.744	1.122	0.94
ENSMUSG00000019897.8	Ccdc59	-0.0110857	0.834457	0.492593	6.99	7.259	6.73	7.152	6.838	7.429
ENSMUSG00000048701.13	Ccdc6	0.128805	0.412959	0.343922	3.929	5.978	4.64	5.894	5.448	5.146
ENSMUSG00000074358.9	Ccdc61	-8.76295e-05	0.999442	0.537161	2.913	2.958	2.45	2.316	2.753	2.316
ENSMUSG00000061882.12	Ccdc62	0.0775708	0.735697	0.460734	1.016	1.807	1.973	1.201	2.12	1.68
ENSMUSG00000046753.10	Ccdc66	0.274714	0.0580225	0.132865	7.85	7.318	7.862	8.228	8.453	7.176
ENSMUSG00000038903.13	Ccdc68	0.18459	0.344914	0.31272	1.409	0.845	1.197	1.667	1.397	0.892
ENSMUSG00000049588.13	Ccdc69	0.547921	0.0370569	0.106397	0.623	0.532	0.788	0.88	1.027	0.55
ENSMUSG00000049305.6	Ccdc71	0.189345	0.000818448	0.012199	4.969	4.675	4.076	5.405	4.867	4.776
ENSMUSG00000090946.3	Ccdc71l	0.432515	0.00890688	0.0493099	1.692	1.977	2.309	3.068	2.751	2.261
ENSMUSG00000045106.12	Ccdc73	0.213565	0.223111	0.252099	2.333	1.456	2.786	1.928	2.198	2.69
ENSMUSG00000030177.14	Ccdc77	0.210567	0.0670554	0.142772	1.484	1.639	1.783	2.286	1.903	1.604
ENSMUSG00000041117.8	Ccdc8	0.110603	0.541955	0.393592	0.382	0.178	0.382	0.408	0.37	0.306
ENSMUSG00000079084.10	Ccdc82	0.0349089	0.873473	0.50446	2.003	1.735	2.113	2.239	2.697	1.751
ENSMUSG00000043923.8	Ccdc84	-0.161239	0.134085	0.197278	15.008	18.494	14.064	15.935	12.177	13.163
ENSMUSG00000084883.2	Ccdc85c	-0.0296341	0.833431	0.492252	3.59	4.772	3.779	3.794	4.699	4.042
ENSMUSG00000024732.7	Ccdc86	0.0985488	0.430154	0.351272	2.492	2.429	2.424	2.806	2.218	2.891
ENSMUSG00000032740.16	Ccdc88a	0.10927	0.525252	0.387641	0.325	0.216	0.325	0.277	0.361	0.228
ENSMUSG00000041375.18	Ccdc9	0.0172843	0.85389	0.498608	22.077	20.578	18.974	21.647	20.001	22.36
ENSMUSG00000030613.13	Ccdc90b	0.10023	0.468284	0.365847	6.399	6.265	5.997	4.951	7.202	5.121
ENSMUSG00000030301.17	Ccdc91	0.262905	0.00480367	0.0348311	10.585	12.466	11.199	13.375	13.535	13.424
ENSMUSG00000037979.13	Ccdc92	0.278784	0.235945	0.258769	0.102	0.165	0.22	0.157	0.267	0.142
ENSMUSG00000026339.18	Ccdc93	0.137853	0.183375	0.229133	1.947	1.886	2.339	2.29	2.254	2.229
ENSMUSG00000002608.8	Ccdc97	0.200689	0.0833283	0.158643	10.746	11.804	10.773	13.109	12.766	11.694
ENSMUSG00000040312.14	Cchcr1	0.167976	0.31382	0.298461	1.748	1.461	1.277	1.553	2.588	1.415
ENSMUSG00000035352.3	Ccl12	0.528932	0.0495999	0.123078	0.098	0.104	0.11	0.098	0.202	0.153
ENSMUSG00000031780.2	Ccl17	-0.321612	0.418588	0.346458	0.099	0.104	0.113	0.045	0.099	0.162
ENSMUSG00000071005.7	Ccl19	0.692348	0.0854962	0.160298	1.917	0.69	1.818	2.519	2.574	1.194
ENSMUSG00000035385.5	Ccl2	-0.154411	0.790289	0.479305	1.561	1.371	0.772	0.537	3.871	0.554
ENSMUSG00000026166.14	Ccl20	1.3121	0.0634281	0.139035	0.113	0.113	0.113	0.192	0.915	0.113
ENSMUSG00000095320.1	Ccl21a	1.41957	0.0187656	0.0748723	0.664	0.979	0.349	2.342	2.307	2.726
ENSMUSG00000094686.1	Ccl21a	0.0288152	0.955927	0.526515	0.809	0.257	0.73	1.019	0.578	0.803
ENSMUSG00000031779.3	Ccl22	0.84234	0.0317461	0.0986962	0.161	0.148	0.135	0.309	0.417	0.229
ENSMUSG00000004814.10	Ccl24	-0.600232	0.168447	0.219749	0.712	0.481	1.018	0.311	0.903	0.361
ENSMUSG00000023235.14	Ccl25	-0.0258726	0.864386	0.50161	5.552	6.08	5.015	5.881	3.363	5.811
ENSMUSG00000095247.7	Ccl27a	0.783066	0.291506	0.287518	0.069	0.025	0.168	0.274	0.363	0.137
ENSMUSG00000073888.13	Ccl27a	-0.107896	0.326158	0.304205	9.46	9.534	7.872	8.933	8.086	7.74
ENSMUSG00000000982.5	Ccl3	0.621727	0.118507	0.186142	0.397	0.217	0.65	0.337	1.095	0.325
ENSMUSG00000018930.3	Ccl4	0.915964	0.0596343	0.134597	0.293	0.269	0.578	0.388	1.702	0.364
ENSMUSG00000035042.2	Ccl5	1.29227	0.103238	0.17516	1.741	1.142	2.012	3.821	13.383	1.142
ENSMUSG00000018927.3	Ccl6	0.0548093	0.878213	0.505785	3.982	2.001	6.283	3.255	7.567	3.41
ENSMUSG00000035373.2	Ccl7	0.125227	0.84719	0.496668	0.198	0.155	0.204	0.149	0.495	0.062
ENSMUSG00000009185.2	Ccl8	0.898549	0.132568	0.196292	0.167	0.174	0.25	0.644	0.258	0.197
ENSMUSG00000019122.8	Ccl9	0.279277	0.223498	0.252303	50.092	43.165	58.447	42.58	82.541	48.836
ENSMUSG00000000378.15	Ccm2	0.177649	0.0309982	0.0976727	8.763	9.378	7.775	11.044	9.503	9.581
ENSMUSG00000027474.12	Ccm2l	0.127831	0.331917	0.30709	2.163	1.446	2.333	2.187	2.746	2.102
ENSMUSG00000027715.9	Ccna2	0.589374	0.128772	0.193329	0.574	0.307	0.396	0.495	1.139	1
ENSMUSG00000041431.16	Ccnb1	1.41991	0.00138389	0.016644	0.21	0.165	0.255	0.555	1.051	0.42
ENSMUSG00000032218.7	Ccnb2	0.768889	0.0500009	0.123693	0.531	0.496	0.3	0.496	1.051	0.462
ENSMUSG00000028252.20	Ccnc	0.0661092	0.587044	0.410352	6.974	7.486	8.658	8.169	8.829	8.169
ENSMUSG00000070348.5	Ccnd1	1.38386	0.0122435	0.0591048	13.214	7.26	14.904	54.987	32.151	14.616
ENSMUSG00000000184.12	Ccnd2	0.237382	0.301831	0.29248	1.336	0.619	1.378	1.603	1.758	1.167
ENSMUSG00000034165.16	Ccnd3	0.0648103	0.487269	0.373463	14.375	16.141	12.74	17.174	13.659	14.147
ENSMUSG00000023572.16	Ccndbp1	0.0866266	0.203081	0.24087	10.028	10.999	10.232	11.634	10.831	10.603
ENSMUSG00000002068.16	Ccne1	1.62877	0.00210466	0.0212095	0.232	0.487	0.336	1.937	0.928	0.534
ENSMUSG00000028212.16	Ccne2	0.457473	0.112128	0.181504	0.495	0.703	0.945	1.319	0.659	1.099
ENSMUSG00000020326.7	Ccng1	0.353332	0.0409851	0.111994	15.661	15.03	17.718	21.795	24.344	17.996
ENSMUSG00000029385.14	Ccng2	0.0336073	0.85559	0.498994	7.62	9.896	7.733	8.335	9.2	6.942
ENSMUSG00000021548.10	Ccnh	-0.106294	0.374019	0.326408	14.743	15.042	16.171	12.916	15.706	15.429
ENSMUSG00000063015.12	Ccni	-0.19401	0.1188	0.186267	54.36	61.667	53.463	48.434	51.244	46.345
ENSMUSG00000021258.10	Ccnk	0.0767566	0.453047	0.359755	8.673	9.018	8.328	9.749	8.899	9.231
ENSMUSG00000027829.15	Ccnl1	-0.14558	0.395782	0.336399	19.439	32.795	24.291	18.834	24.556	18.25
ENSMUSG00000029068.16	Ccnl2	-0.11965	0.324947	0.303924	43.127	57.856	48.966	45.684	44.565	42.296
ENSMUSG00000042417.5	Ccno	-0.0717427	0.60704	0.41772	0.211	0.277	0.399	0.333	0.244	0.311
ENSMUSG00000011960.12	Ccnt1	-0.186498	0.0242699	0.0856263	5.589	6.977	5.551	5.086	4.697	4.765
ENSMUSG00000026349.14	Ccnt2	-0.0876039	0.653827	0.434207	5.158	5.544	6.384	5.787	5.5	5.036
ENSMUSG00000070871.10	Ccnyl1	0.209534	0.0280204	0.0924249	2.118	2.26	2.053	2.533	2.923	2.221
ENSMUSG00000033904.16	Ccp110	-0.237853	0.202614	0.240549	1.189	2.146	1.745	1.66	1.168	1.442
ENSMUSG00000034563.16	Ccpg1	0.128957	0.273698	0.278223	19.926	23.357	22.814	25.778	25.135	24.151
ENSMUSG00000086158.2	Ccpg1os	0.0973014	0.345224	0.312813	7.093	5.808	6.293	5.684	7.379	6.941
ENSMUSG00000025804.5	Ccr1	0.484582	0.122789	0.189065	0.146	0.138	0.269	0.169	0.384	0.154
ENSMUSG00000044052.3	Ccr10	0.616353	0.0721707	0.147923	0.255	0.17	0.238	0.409	0.664	0.289
ENSMUSG00000049103.14	Ccr2	1.18077	0.0562491	0.130769	0.546	0.657	0.535	1.148	3.142	0.524
ENSMUSG00000079227.10	Ccr5	0.366069	0.526039	0.387866	0.862	1.125	1.947	1.085	3.64	0.446
ENSMUSG00000037944.8	Ccr7	0.524539	0.221558	0.251429	0.215	0.26	0.291	0.536	0.751	0.245
ENSMUSG00000043953.12	Ccrl2	0.13327	0.486938	0.373325	0.758	0.617	0.996	0.823	1.386	0.769
ENSMUSG00000031971.15	Ccsap	0.305581	0.00201243	0.0207175	0.166	0.166	0.197	0.187	0.238	0.218
ENSMUSG00000058690.14	Ccser2	0.311572	0.163614	0.217019	4.495	5.347	5.836	6.24	7.804	5.877
ENSMUSG00000034024.8	Cct2	-0.027916	0.637249	0.428373	51.05	51.589	53.192	55.377	48.864	51.446
ENSMUSG00000001416.13	Cct3	-0.0613246	0.600033	0.415293	45.406	47.214	36.477	41.833	37.66	41.39
ENSMUSG00000007739.10	Cct4	-0.0913772	0.00366008	0.0295865	47.135	44.669	44.835	42.648	41.272	40.993
ENSMUSG00000022234.15	Cct5	-0.061836	0.475289	0.36899	66.943	60.974	69.897	68.886	53.817	64.197
ENSMUSG00000020698.11	Cct6b	-0.0553946	0.774886	0.474136	0.497	0.287	0.364	0.254	0.486	0.453
ENSMUSG00000030007.8	Cct7	0.00181195	0.984888	0.533664	56.241	46.327	47.331	55.543	42.186	47.598
ENSMUSG00000025613.13	Cct8	0.0332228	0.707825	0.452102	104.005	93.681	100.42	104.005	89.993	95.343
ENSMUSG00000029617.10	Ccz1	0.0570115	0.486382	0.373178	21.556	21.978	21.577	20.406	23.702	22.455
ENSMUSG00000025510.14	Cd151	0.209813	0.0867542	0.161404	22.093	21.377	22.329	23.742	31.995	23.394
ENSMUSG00000038304.14	Cd160	0.162458	0.522731	0.386856	0.389	0.264	0.222	0.375	0.25	0.208
ENSMUSG00000008845.9	Cd163	-1.00911	0.0719034	0.147626	2.596	1.562	3.906	1.727	0.715	2.31
ENSMUSG00000019818.15	Cd164	-0.0729487	0.4614	0.362928	130.129	141.762	136.277	128.198	129.633	120.726
ENSMUSG00000021624.9	Cd180	0.7046	0.130651	0.194825	0.622	0.528	0.773	1.018	2.904	0.698
ENSMUSG00000030724.7	Cd19	0.703267	0.10459	0.176285	0.633	0.339	0.741	1.975	1.836	0.602
ENSMUSG00000028076.12	Cd1d1	0.0715302	0.533334	0.390567	165.815	161.947	141.629	145.406	185.697	162.79
ENSMUSG00000027863.8	Cd2	0.723204	0.0509293	0.124718	0.434	0.114	0.331	0.491	0.891	0.331
ENSMUSG00000022661.14	Cd200	-0.22423	0.528831	0.388884	0.742	0.546	0.87	0.785	0.981	0.393
ENSMUSG00000036172.17	Cd200r3	0.151752	0.533628	0.390694	0.196	0.131	0.147	0.188	0.164	0.098
ENSMUSG00000062082.16	Cd200r4	-0.451269	0.164654	0.217651	0.363	0.158	0.27	0.168	0.214	0.102
ENSMUSG00000034783.7	Cd207	0.91851	0.060282	0.135431	3.821	2.833	4.446	6.524	14.675	3.255
ENSMUSG00000031494.7	Cd209a	0.750168	0.149374	0.207847	0.236	0.269	0.314	0.572	1.122	0.202
ENSMUSG00000065987.12	Cd209b	0.130703	0.588097	0.410569	0.33	0.115	0.261	0.314	0.184	0.307
ENSMUSG00000051906.15	Cd209f	-0.0542975	0.873784	0.504521	0.274	0.147	0.117	0.274	0.147	0.274
ENSMUSG00000030577.14	Cd22	0.868195	0.021948	0.081288	0.52	0.386	0.554	0.856	1.795	0.537
ENSMUSG00000005763.15	Cd247	0.245297	0.526181	0.387898	1.113	0.816	1.669	1.855	1.298	1.41
ENSMUSG00000047139.9	Cd24a	0.32022	0.361943	0.320528	1.501	1.053	3.958	2.466	2.87	1.58
ENSMUSG00000030336.14	Cd27	0.108764	0.774054	0.473849	0.26	0.183	0.25	0.578	0.183	0.231
ENSMUSG00000016496.7	Cd274	0.372173	0.3316	0.306891	0.574	0.651	0.747	0.785	1.761	0.536
ENSMUSG00000035914.11	Cd276	0.335858	0.284863	0.28409	0.723	1.189	1.43	1.463	2.459	1.013
ENSMUSG00000042502.10	Cd2bp2	0.236212	0.0411385	0.112096	11.321	11.456	11.296	14.729	13.831	13.413
ENSMUSG00000034652.12	Cd300a	0.255514	0.465572	0.364762	0.76	0.519	0.848	0.772	1.418	0.646
ENSMUSG00000044811.13	Cd300c2	0.0591126	0.904497	0.513617	1.618	1.166	3.056	1.664	5.587	1.067
ENSMUSG00000048498.7	Cd300e	0.593727	0.0840918	0.159282	0.39	0.78	0.424	0.441	1.271	0.881
ENSMUSG00000063193.8	Cd300lb	0.0506363	0.91724	0.516937	0.42	0.248	0.668	0.344	1.365	0.315
ENSMUSG00000034641.2	Cd300ld	0.0567873	0.882699	0.507289	1.579	1.077	2.4	1.323	3.605	1.195
ENSMUSG00000069607.4	Cd300ld3	-0.402268	0.59517	0.413404	0.417	0.834	2.344	1.808	1.53	0.397
ENSMUSG00000089722.2	Cd300ld5	1.14044	0.10259	0.174706	0.435	0.207	0.207	0.207	1.597	0.415
ENSMUSG00000047798.15	Cd300lf	-0.181725	0.44292	0.356095	0.818	0.58	1.082	0.58	0.989	0.567
ENSMUSG00000017309.11	Cd300lg	0.400097	0.152708	0.210296	9.692	2.848	9.747	11.664	11.573	10.222
ENSMUSG00000060703.12	Cd302	-0.0832097	0.388613	0.332908	126.863	199.883	130.147	125.728	125.839	137.792
ENSMUSG00000004609.11	Cd33	0.00742595	0.976256	0.531465	0.233	0.4	0.467	0.389	0.422	0.311
ENSMUSG00000016494.9	Cd34	0.277766	0.472282	0.367679	1.207	0.562	1.143	1.594	1.917	0.921
ENSMUSG00000002944.15	Cd36	0.998438	0.0133744	0.0623043	35.187	37.217	41.421	63.112	151.52	61.535
ENSMUSG00000030798.15	Cd37	0.150238	0.54195	0.393592	1.648	1.008	1.667	1.752	2.327	1.196
ENSMUSG00000029084.5	Cd38	0.307816	0.113735	0.182649	5.348	2.697	5.723	5.947	6.876	5.528
ENSMUSG00000032094.8	Cd3d	0.312925	0.365901	0.322399	0.176	0.218	0.157	0.418	0.212	0.157
ENSMUSG00000032093.7	Cd3e	0.269926	0.537507	0.391951	0.415	0.263	0.334	0.486	0.516	0.213
ENSMUSG00000047649.9	Cd3eap	0.0939467	0.522529	0.386794	1.867	1.391	1.93	2.03	1.573	2.162
ENSMUSG00000002033.14	Cd3g	0.54731	0.040885	0.111844	0.288	0.265	0.413	0.694	0.476	0.39
ENSMUSG00000023274.14	Cd4	-0.452701	0.264883	0.273972	0.636	0.666	0.948	1.382	0.646	0.313
ENSMUSG00000017652.16	Cd40	0.442744	0.314761	0.298853	0.209	0.293	0.345	0.576	0.91	0.23
ENSMUSG00000005087.17	Cd44	0.316445	0.422117	0.347892	1.333	1.127	2.775	1.443	4.177	1.278
ENSMUSG00000016493.13	Cd46	0.168237	0.133063	0.19655	0.357	0.413	0.324	0.357	0.424	0.313
ENSMUSG00000015355.13	Cd48	0.159173	0.726541	0.457753	1.104	0.926	2.326	1.294	3.513	0.854
ENSMUSG00000000682.7	Cd52	0.49949	0.259174	0.270802	5.471	4.034	7.478	8.471	20.299	4.484
ENSMUSG00000040747.9	Cd53	0.226133	0.59851	0.414787	3.087	2.363	4.968	3.812	8.589	2.007
ENSMUSG00000026399.12	Cd55	0.468552	0.0412602	0.112282	9.94	4.232	9.92	12.41	11.855	11.529
ENSMUSG00000032679.12	Cd59a	0.768182	4.55949e-06	0.000540157	44.741	32.377	46.39	72.134	81.086	70.485
ENSMUSG00000068686.12	Cd59b	1.2486	5.82149e-05	0.00250392	9.725	3.971	6.912	16.049	17.979	15.038
ENSMUSG00000015854.7	Cd5l	-0.0400736	0.931667	0.520897	23.051	15.154	31.905	15.351	58.157	13.812
ENSMUSG00000025351.14	Cd63	0.62994	0.149418	0.207888	4.012	1.778	5.276	6.236	11.494	3.099
ENSMUSG00000018774.13	Cd68	0.247211	0.603975	0.416666	5.689	2.895	5.79	4.368	15.929	3.078
ENSMUSG00000030156.5	Cd69	-0.087658	0.804756	0.483654	0.335	0.214	0.415	0.428	0.442	0.375
ENSMUSG00000025163.6	Cd7	0.743696	0.0438272	0.115704	0.763	0.196	0.489	0.998	1.468	0.45
ENSMUSG00000028459.11	Cd72	0.593615	0.202691	0.240572	1.654	1.488	1.878	2.594	7.174	1.394
ENSMUSG00000003379.7	Cd79a	0.591781	0.124139	0.189963	1.291	0.411	0.895	1.658	1.937	0.763
ENSMUSG00000040592.11	Cd79b	0.764055	0.0945575	0.168091	0.746	0.35	0.781	1.609	2.04	0.594
ENSMUSG00000037706.17	Cd81	0.054206	0.65005	0.432872	147.318	151.794	148.684	138.743	196.013	136.355
ENSMUSG00000027215.13	Cd82	-0.11999	0.18135	0.227608	40.451	42.05	41.225	38.128	40.928	34.373
ENSMUSG00000015396.4	Cd83	-0.338591	0.541718	0.393511	0.841	0.249	2.209	0.519	1.909	0.497
ENSMUSG00000038147.13	Cd84	0.0594816	0.876619	0.505343	2.273	0.952	3.836	2.259	4.603	1.52
ENSMUSG00000022901.13	Cd86	0.028193	0.947698	0.52451	1.115	0.627	1.448	0.937	2.176	0.457
ENSMUSG00000053977.13	Cd8a	0.193647	0.581293	0.408199	0.366	0.292	0.219	0.599	0.38	0.175
ENSMUSG00000053044.8	Cd8b1	0.674204	0.0250216	0.0871482	0.17	0.145	0.158	0.473	0.449	0.218
ENSMUSG00000030342.8	Cd9	0.162786	0.34556	0.312915	22.861	29.79	23.103	25.114	34.37	21.134
ENSMUSG00000027435.8	Cd93	0.370098	0.119623	0.186702	1.012	0.512	1.301	1.366	1.537	1.077
ENSMUSG00000035776.14	Cd99l2	0.0240649	0.779138	0.475539	8.633	9.558	8.724	8.438	9.883	8.321
ENSMUSG00000028755.3	Cda	0.522274	0.067287	0.143022	6.302	6.283	5.19	6.329	12.659	6.598
ENSMUSG00000021982.14	Cdadc1	0.120006	0.203932	0.241397	22.373	23.349	24.279	26.005	21.219	24.582
ENSMUSG00000027284.16	Cdan1	0.54101	0.0103603	0.0537943	3.377	2.129	2.68	3.403	5.321	4.257
ENSMUSG00000039128.13	Cdc123	0.05995	0.301607	0.292367	50.568	54.329	56.403	56.124	53.513	48.666
ENSMUSG00000033502.14	Cdc14a	-0.0592891	0.768674	0.472136	0.632	0.632	0.744	0.632	0.892	0.669
ENSMUSG00000033102.15	Cdc14b	0.181574	0.362605	0.320867	5.937	6.957	7.481	7.193	8.762	6.12
ENSMUSG00000038416.15	Cdc16	0.0363487	0.700872	0.449803	8.065	6.488	6.735	7.302	6.903	7.92
ENSMUSG00000006398.15	Cdc20	0.774569	0.0427286	0.114274	0.657	0.28	0.377	0.474	0.985	0.401
ENSMUSG00000027330.16	Cdc25b	0.779122	0.0309971	0.0976727	0.661	0.496	1.074	1.301	1.446	0.64
ENSMUSG00000066149.11	Cdc26	0.00349295	0.973432	0.53082	21.179	19.575	17.578	20.85	16.065	19.96
ENSMUSG00000020687.13	Cdc27	0.223535	0.125925	0.191216	4.554	5.665	6.027	6.692	5.798	5.894
ENSMUSG00000020307.15	Cdc34	0.162123	0.0791191	0.154527	61.576	60.952	52.353	69.458	59.836	63.977
ENSMUSG00000019471.10	Cdc37	0.0677119	0.186758	0.231096	44.833	40.176	40.409	43.637	41.924	41.149
ENSMUSG00000024780.7	Cdc37l1	0.016008	0.922428	0.51834	13.55	14.762	18.033	15.485	14.395	17.132
ENSMUSG00000038446.8	Cdc40	0.191949	0.197624	0.237681	6.431	8.125	9.671	9.639	8.825	9.02
ENSMUSG00000006699.17	Cdc42	0.0936053	0.190903	0.233756	73.592	69.054	75.861	78.038	83.321	71.835
ENSMUSG00000026490.18	Cdc42bpa	0.0189302	0.853323	0.498486	5.14	6.448	5.345	6.007	4.966	5.66
ENSMUSG00000021279.5	Cdc42bpb	0.108418	0.270853	0.276972	16.988	19.035	17.923	16.852	19.403	19.235
ENSMUSG00000107268.1	Cdc42bpg	0.268501	0.175543	0.224177	3.506	4.717	2.705	3.57	3.484	3.938
ENSMUSG00000024769.7	Cdc42bpg	0.268501	0.175543	0.224177	3.506	4.717	2.705	3.57	3.484	3.938
ENSMUSG00000041598.7	Cdc42ep4	0.153849	0.175627	0.224177	20.221	13.841	22.766	22.37	20.386	18.854
ENSMUSG00000063838.6	Cdc42ep5	-1.05354	0.0187147	0.0747885	4.63	11.026	2.83	4.843	1.352	2.117
ENSMUSG00000046722.14	Cdc42se1	0.442852	0.0292817	0.0948458	8.827	8.157	9.71	13.322	15.97	10.838
ENSMUSG00000052298.12	Cdc42se2	0.380976	0.0340564	0.102276	5.325	4.875	6.396	7.343	8.57	6.613
ENSMUSG00000017499.15	Cdc6	0.634616	0.0205034	0.0782639	0.19	0.203	0.23	0.23	0.434	0.285
ENSMUSG00000029283.17	Cdc7	0.318414	0.158967	0.214419	0.213	0.236	0.449	0.343	0.449	0.225
ENSMUSG00000026361.9	Cdc73	0.178614	0.401991	0.33926	4.755	4.78	7.279	7.291	4.984	6.182
ENSMUSG00000048922.18	Cdca2	0.428922	0.06886	0.144516	0.204	0.174	0.235	0.235	0.347	0.184
ENSMUSG00000023505.13	Cdca3	0.682827	0.0478823	0.120729	1.377	0.778	1.177	1.125	2.964	1.156
ENSMUSG00000047832.9	Cdca4	0.279619	0.033796	0.101926	1.422	1.595	1.459	2.312	1.867	1.434
ENSMUSG00000024791.10	Cdca5	0.854137	0.00403212	0.0314658	0.171	0.183	0.16	0.274	0.388	0.205
ENSMUSG00000055612.15	Cdca7	0.538986	0.00788491	0.0459804	1.014	1.046	1.635	1.798	1.798	2.011
ENSMUSG00000028873.16	Cdca8	0.61034	0.0242676	0.0856263	0.562	0.47	0.436	0.47	1.056	0.78
ENSMUSG00000035498.10	Cdcp1	0.273172	0.209203	0.244271	1.474	1.646	1.717	1.302	2.547	2.018
ENSMUSG00000000303.12	Cdh1	0.0883353	0.768004	0.471894	8.902	9.962	12.415	9.236	13.475	10.75
ENSMUSG00000031841.19	Cdh13	0.506713	0.0666824	0.14228	1.061	0.585	0.768	1.445	1.354	1.427
ENSMUSG00000040420.15	Cdh18	-0.0047773	0.975221	0.531148	0.702	0.821	0.719	0.736	0.821	0.719
ENSMUSG00000047216.8	Cdh19	0.994261	0.000961919	0.0134273	0.296	0.296	0.615	0.889	1.003	0.889
ENSMUSG00000024304.14	Cdh2	-0.172155	0.189183	0.232707	29.25	29.626	34.571	26.479	27.495	28.248
ENSMUSG00000059674.7	Cdh24	0.00507791	0.972343	0.530512	0.343	0.421	0.294	0.382	0.284	0.333
ENSMUSG00000061048.8	Cdh3	0.177442	0.325087	0.303972	0.265	0.167	0.235	0.294	0.216	0.196
ENSMUSG00000031871.9	Cdh5	0.27638	0.291377	0.287445	7.813	3.391	8.908	8.382	11.856	7.308
ENSMUSG00000032595.10	Cdhr4	0.762456	0.0057389	0.0383579	0.189	0.212	0.118	0.413	0.271	0.271
ENSMUSG00000025497.15	Cdhr5	-0.193987	0.0590704	0.134074	30.395	42.366	30.73	26.481	28.548	28.412
ENSMUSG00000030682.4	Cdipt	0.0751241	0.293899	0.288599	25.631	26.718	28.685	30.037	29.583	27.39
ENSMUSG00000019942.13	Cdk1	0.53749	0.10277	0.174828	0.767	0.477	0.674	0.732	1.639	0.779
ENSMUSG00000033862.7	Cdk10	-0.149196	0.121496	0.18823	16.128	15.241	14.939	11.481	14.525	14.354
ENSMUSG00000029062.14	Cdk11b	0.269547	0.000871825	0.0126666	17.446	16.665	16.798	22.186	19.513	18.957
ENSMUSG00000003119.14	Cdk12	0.0927555	0.544085	0.394199	4.245	4.637	5.29	5.486	4.806	5.172
ENSMUSG00000041297.8	Cdk13	0.131915	0.419794	0.346909	7.105	9.257	10.874	10.311	10.224	8.65
ENSMUSG00000028926.15	Cdk14	0.106145	0.694372	0.447878	0.514	0.288	0.539	0.551	0.539	0.313
ENSMUSG00000031065.14	Cdk16	0.103113	0.330413	0.306231	15.183	17.144	15.677	19.725	16.588	15.55
ENSMUSG00000020015.10	Cdk17	0.245632	0.236752	0.259264	7.111	9.461	9.422	10.982	9.758	10.271
ENSMUSG00000026437.11	Cdk18	0.159213	0.183901	0.22947	18.098	18.283	19.786	19.185	18.491	17.057
ENSMUSG00000038481.13	Cdk19	0.137503	0.508909	0.381693	1.297	1.669	1.876	2.097	1.986	1.283
ENSMUSG00000025358.16	Cdk2	-0.109027	0.352873	0.31639	6.577	7.233	6.305	5.649	6.225	6.273
ENSMUSG00000021483.8	Cdk20	0.587291	0.000224653	0.00571721	4.306	3.493	4.092	6.73	7.258	5.689
ENSMUSG00000029394.11	Cdk2ap1	-0.067321	0.260918	0.271826	25.949	26.668	23.466	25.467	22.347	24.275
ENSMUSG00000024856.10	Cdk2ap2	0.086386	0.573274	0.405258	20.669	24.533	15.762	26.884	19.344	17.7
ENSMUSG00000097485.7	Cdk2ap2	0.086386	0.573274	0.405258	20.669	24.533	15.762	26.884	19.344	17.7
ENSMUSG00000006728.12	Cdk4	0.146101	0.0641313	0.139828	21.469	19.318	19.061	23.975	21.879	20.586
ENSMUSG00000028969.10	Cdk5	0.0184806	0.740353	0.4622	15.225	14.982	13.862	13.481	15.7	14.327
ENSMUSG00000048895.13	Cdk5r1	-0.281829	0.143805	0.204009	0.187	0.335	0.207	0.187	0.168	0.256
ENSMUSG00000027487.11	Cdk5rap1	0.0125976	0.925349	0.51919	4.945	3.467	6.466	4.704	5.613	4.96
ENSMUSG00000039298.16	Cdk5rap2	-0.0305902	0.893272	0.510055	0.752	1.513	0.99	1.447	1.275	0.619
ENSMUSG00000018669.14	Cdk5rap3	0.0632177	0.32612	0.304205	30.328	29.222	29.058	33.632	31.055	30.476
ENSMUSG00000040274.11	Cdk6	0.438491	0.00550078	0.0374181	1.883	2.248	2.408	3.021	3.59	3.036
ENSMUSG00000069089.8	Cdk7	0.137236	0.21937	0.250183	7.531	8.326	8.977	9.725	7.683	7.362
ENSMUSG00000029635.15	Cdk8	0.0920191	0.316912	0.299863	15.065	17.289	14.758	16.872	16.011	15.938
ENSMUSG00000009555.16	Cdk9	0.132889	0.0478934	0.120729	20.206	21.657	16.842	22.229	23.372	21.129
ENSMUSG00000006191.17	Cdkal1	-0.304354	0.000128549	0.00412659	3.873	3.511	3.935	2.848	3.117	2.91
ENSMUSG00000020990.5	Cdkl1	-0.129356	0.551748	0.396906	0.141	0.224	0.365	0.247	0.295	0.236
ENSMUSG00000029403.14	Cdkl2	-0.0545999	0.714194	0.45397	2.013	2.309	2.416	1.772	2.242	2.309
ENSMUSG00000020389.19	Cdkl3	0.362259	0.130751	0.194915	0.239	0.315	0.326	0.37	0.511	0.196
ENSMUSG00000031292.14	Cdkl5	0.13878	0.242999	0.262363	0.511	0.791	0.755	0.73	0.645	0.694
ENSMUSG00000003031.14	Cdkn1b	0.493161	0.0721193	0.147915	11.293	11.867	14.233	22.245	16.294	13.731
ENSMUSG00000037664.13	Cdkn1c	0.118016	0.440176	0.355005	0.891	1.343	1.046	1.42	1.265	1.098
ENSMUSG00000044303.6	Cdkn2a	-0.0060052	0.984444	0.533577	0.439	0.288	0.481	0.467	0.59	0.316
ENSMUSG00000038069.6	Cdkn2aip	0.276696	0.145419	0.205046	5.001	5.283	5.655	7.598	5.814	6.697
ENSMUSG00000020392.8	Cdkn2aipnl	-1.98625e-05	0.999739	0.537161	5.304	4.775	4.835	5.946	5.085	4.805
ENSMUSG00000028551.14	Cdkn2c	0.793421	0.170924	0.221189	1.2	1.153	1.038	2.238	4.787	0.681
ENSMUSG00000096472.2	Cdkn2d	0.331465	0.0339892	0.102267	1.085	1.882	1.731	1.992	2.17	1.772
ENSMUSG00000037628.10	Cdkn3	0.987421	0.0164987	0.0699217	0.204	0.128	0.289	0.349	0.689	0.272
ENSMUSG00000039496.8	Cdnf	-0.295655	0.0550125	0.12965	0.357	0.296	0.308	0.296	0.259	0.308
ENSMUSG00000038119.15	Cdon	0.036067	0.823674	0.489584	0.244	0.281	0.403	0.403	0.391	0.318
ENSMUSG00000064284.12	Cdpf1	0.104963	0.629494	0.425717	5.672	2.995	2.793	3.351	4.593	4.391
ENSMUSG00000030878.11	Cdr2	0.154456	0.462736	0.363457	0.446	0.21	0.49	0.622	0.464	0.341
ENSMUSG00000050910.5	Cdr2l	0.456775	0.00175531	0.0190738	1.07	0.724	1.021	1.399	1.482	1.136
ENSMUSG00000029330.8	Cds1	0.129346	0.478229	0.369841	0.227	0.202	0.227	0.202	0.353	0.189
ENSMUSG00000058793.14	Cds2	0.0782096	0.6219	0.422919	10.131	12.249	12.546	12.438	14.812	11.17
ENSMUSG00000006585.3	Cdt1	0.99399	0.000367552	0.0076037	1.224	1.121	0.879	2.017	2.758	1.81
ENSMUSG00000032803.15	Cdv3	0.0715303	0.386806	0.332145	29.807	32.347	30.476	34.709	28.458	33.587
ENSMUSG00000059288.14	Cdyl	0.441834	0.0521842	0.126159	1.236	1.476	1.768	2.369	2.833	1.785
ENSMUSG00000031758.10	Cdyl2	-0.0958078	0.357906	0.318423	0.224	0.336	0.28	0.289	0.271	0.243
ENSMUSG00000074272.10	Ceacam1	-0.183447	0.11202	0.181404	59.47	72.093	76.113	59.131	58.081	60.277
ENSMUSG00000014686.8	Ceacam16	0.704143	0.064768	0.140368	0.152	0.173	0.122	0.183	0.244	0.102
ENSMUSG00000054385.14	Ceacam2	0.377683	0.19003	0.233328	0.262	0.262	0.315	0.249	0.459	0.289
ENSMUSG00000034957.10	Cebpa	0.0838102	0.544525	0.394394	135.368	113.432	113.856	110.357	152.004	113.065
ENSMUSG00000056501.3	Cebpb	-0.521233	0.0662247	0.141688	26.399	31.077	23.063	26.499	13.432	25.813
ENSMUSG00000071637.5	Cebpd	-0.162905	0.448397	0.358222	1.034	0.855	0.883	1.284	0.676	0.886
ENSMUSG00000052435.7	Cebpe	0.684803	0.0033397	0.0279811	6.243	6.676	3.26	8.12	11.079	7.651
ENSMUSG00000056216.9	Cebpg	0.0665508	0.660407	0.436413	12.842	16.05	16.137	19.691	13.205	15.479
ENSMUSG00000062691.10	Cebpzos	-0.131199	0.17723	0.224965	18.46	17.645	13.599	13.038	16.399	14.645
ENSMUSG00000071226.11	Cecr2	0.14725	0.52725	0.388278	1.691	1.737	3.001	2.407	2.057	2.575
ENSMUSG00000058579.5	Cela2a	-1.21327	0.116638	0.184829	7.938	0.266	0.139	0.104	0.15	0.196
ENSMUSG00000023433.8	Cela3b	-0.87861	0.205447	0.242398	2.09	0.056	0.056	0.056	0.072	0.056
ENSMUSG00000110883.1	Celf1	0.000698456	0.996327	0.536315	9.881	11.892	12.854	12.155	10.431	12.055
ENSMUSG00000005506.16	Celf1	0.000698456	0.996327	0.536315	9.881	11.892	12.854	12.155	10.431	12.055
ENSMUSG00000002107.18	Celf2	0.124721	0.469736	0.366498	1.802	2.063	2.262	2.001	2.021	3.09
ENSMUSG00000024268.16	Celf4	0.0621138	0.784402	0.477287	0.151	0.231	0.481	0.285	0.231	0.196
ENSMUSG00000016028.10	Celsr1	0.410695	0.137341	0.199378	10.575	7.782	8.704	7.104	14.208	14.859
ENSMUSG00000068740.13	Celsr2	-0.0509415	0.883801	0.507653	0.234	0.325	0.26	0.195	0.208	0.247
ENSMUSG00000029177.9	Cenpa	0.397803	0.129661	0.194014	2.645	2.967	2.401	4.052	5.398	2.523
ENSMUSG00000068267.5	Cenpb	0.069265	0.498464	0.37765	13.499	11.952	10.877	11.622	14.682	13.143
ENSMUSG00000029253.12	Cenpc1	0.489623	0.00849576	0.0479011	1.843	1.659	1.935	2.654	2.543	1.953
ENSMUSG00000045328.11	Cenpe	0.673135	0.024106	0.0853252	0.286	0.168	0.168	0.522	0.472	0.219
ENSMUSG00000026605.14	Cenpf	0.46018	0.341167	0.310922	0.106	0.116	0.233	0.127	0.317	0.106
ENSMUSG00000045273.8	Cenph	0.844648	0.00126827	0.0158394	0.122	0.122	0.122	0.233	0.257	0.196
ENSMUSG00000021714.15	Cenpk	0.283875	0.0205629	0.0783989	0.724	0.859	0.776	0.828	1.087	0.859
ENSMUSG00000026708.16	Cenpl	0.486968	0.0121417	0.0588891	3.417	4.401	4.039	7.146	5.696	3.728
ENSMUSG00000031756.5	Cenpn	0.56858	0.00209454	0.0211643	0.396	0.54	0.576	0.852	0.552	0.768
ENSMUSG00000020652.17	Cenpo	0.412564	0.0257072	0.0884531	1.952	3.067	2.05	3.527	3.051	2.51
ENSMUSG00000021391.10	Cenpp	0.257708	0.235677	0.258672	0.326	0.249	0.374	0.297	0.508	0.547
ENSMUSG00000023919.7	Cenpq	0.221422	0.165629	0.218143	1.384	1.558	1.558	1.627	2.492	1.292
ENSMUSG00000073705.10	Cenps	0.885444	0.0220494	0.0814791	0.266	0.137	0.137	0.197	0.403	0.205
ENSMUSG00000036672.5	Cenpt	0.0939013	0.598995	0.414889	1.396	0.74	1.364	1.047	1.533	1.227
ENSMUSG00000031629.14	Cenpu	0.0666295	0.766686	0.471406	0.135	0.223	0.365	0.264	0.324	0.223
ENSMUSG00000018509.8	Cenpv	0.101596	0.374864	0.326694	15.2	15.263	12.75	12.531	17.431	15.925
ENSMUSG00000075266.5	Cenpw	0.374139	0.00658407	0.0414449	0.534	0.612	0.548	0.555	0.769	0.755
ENSMUSG00000025144.17	Cenpx	0.0219002	0.847253	0.496683	15.872	15.673	12.806	13.28	17.337	15.498
ENSMUSG00000039523.16	Cep104	0.00148792	0.991489	0.53519	2.26	2.69	2.786	3.204	2.296	2.26
ENSMUSG00000020728.17	Cep112	0.0815419	0.773178	0.47357	0.482	0.195	0.267	0.318	0.359	0.39
ENSMUSG00000061533.16	Cep128	0.492313	0.166139	0.218347	0.368	0.445	0.546	0.394	1.194	0.521
ENSMUSG00000039781.14	Cep131	0.371186	0.0152458	0.0671692	1.653	1.645	2.194	2.087	2.169	2.038
ENSMUSG00000036403.15	Cep135	0.114017	0.433735	0.352534	0.88	0.958	1.152	1.074	1.113	1.152
ENSMUSG00000068394.4	Cep152	0.584115	0.00370239	0.0298422	0.513	0.416	0.749	0.86	0.888	0.832
ENSMUSG00000056919.9	Cep162	0.450215	0.131687	0.195542	1.137	0.539	1.167	1.511	1.511	1.736
ENSMUSG00000043987.18	Cep164	0.453976	0.0571138	0.131862	3.433	3.997	5.834	6.624	7.703	5.979
ENSMUSG00000057335.11	Cep170	-0.018939	0.933093	0.521217	1.88	2.906	3.484	2.559	2.848	2.617
ENSMUSG00000072825.11	Cep170b	0.0276692	0.930066	0.52042	9.203	13.382	10.308	12.222	10.336	9.121
ENSMUSG00000035790.15	Cep19	0.289584	0.00728057	0.0437736	2.937	3.512	2.791	4.54	3.538	3.725
ENSMUSG00000024542.9	Cep192	0.389761	0.280576	0.281891	1.223	0.805	1.384	0.998	3.026	1.046
ENSMUSG00000038241.16	Cep250	0.48169	0.000176629	0.00489615	2.563	2.63	2.828	3.506	3.804	3.456
ENSMUSG00000019971.10	Cep290	0.485018	0.0021604	0.021558	0.941	0.67	1.282	1.623	1.246	1.246
ENSMUSG00000046111.17	Cep295	0.220417	0.378546	0.328337	3.034	1.863	1.282	2.013	2.654	1.502
ENSMUSG00000033671.18	Cep350	-0.349788	0.00345164	0.0285743	1.938	1.594	2.096	1.37	1.572	1.31
ENSMUSG00000029790.16	Cep41	-0.15961	0.208457	0.24392	1.314	1.172	1.253	1.142	1.051	1.435
ENSMUSG00000038215.15	Cep44	0.353248	0.0259588	0.0888653	9.022	9.601	10.384	12.154	13.38	12.222
ENSMUSG00000031922.12	Cep57	0.114936	0.514913	0.384025	6.56	7.227	7.574	8.344	8.46	8.164
ENSMUSG00000019813.16	Cep57l1	0.418524	0.00764736	0.045038	1.913	2.439	1.83	2.301	3.59	3.132
ENSMUSG00000032534.18	Cep63	0.00282921	0.974626	0.531056	8.134	6.968	5.524	6.073	7.771	7.23
[truncated: 10,144 more rows]

## Sheet: CDK1 DEG
EnsemblID	Gene Symbol	log2fc	pval	qval	CDK1 WT_1	CDK1 WT_2	CDK1 WT_3	CDK1 KO_1	CDK1 KO_2	CDK1 KO_3
ENSMUSG00000074254.4	Cyp2a4	6.76266	7.52004e-09	1.83962e-05	0.761	1.134	1.201	100.368	217.316	56.816
ENSMUSG00000078877.11	Gm14295	4.72813	3.11874e-09	1.24654e-05	4.379	6.369	4.777	142.905	169.178	112.652
ENSMUSG00000094932.7	Gm2007	4.61739	1.55307e-07	8.684e-05	2.482	2.482	2.482	90.329	52.113	88.84
ENSMUSG00000094475.7	Gm11007	4.61739	1.55307e-07	8.684e-05	2.482	2.482	2.482	90.329	52.113	88.84
ENSMUSG00000066258.13	Trim12a	4.58861	6.77615e-08	6.63056e-05	4.014	4.817	4.817	95.933	129.249	83.088
ENSMUSG00000107311.1	CU041251.4	4.57342	0.00316822	0.0272302	1142.93	590.146	323.358	1877.64	47965.9	32506.9
ENSMUSG00000045868.12	Gvin1	4.14899	4.29534e-05	0.00212275	1.188	1.188	1.188	21.981	50.378	9.981
ENSMUSG00000096688.1	Mup17	3.57304	0.000215079	0.00555299	219.943	198.949	591.597	4535.55	4717.21	2389.49
ENSMUSG00000078878.9	Gm14305	3.50993	7.2447e-07	0.000184422	2.695	2.695	14.554	35.576	69.535	41.505
ENSMUSG00000074527.11	Gm14296	3.0653	9.74836e-10	9.53892e-06	3.954	8.28	4.572	37.073	35.59	39.05
ENSMUSG00000040660.6	Cyp2b9	3.03575	0.000157437	0.00463415	2.775	2.101	9.699	58.865	47.119	16.946
ENSMUSG00000078894.9	2210418O10Rik	2.79973	6.32035e-05	0.0026312	3.868	1.209	4.472	33.72	26.469	26.469
ENSMUSG00000040583.8	Cyp2b13	2.74273	0.00453784	0.0336773	0.476	0.286	0.738	5.405	9.334	1.357
ENSMUSG00000112640.1	Gm32687	2.45093	0.00692828	0.0425176	1.326	1.326	1.326	16.443	17.636	1.326
ENSMUSG00000057596.13	Trim30d	2.42292	0.000323842	0.00701279	2.925	2.792	4.388	17.816	37.36	14.891
ENSMUSG00000059824.12	Dbp	2.36358	0.000163196	0.00465873	3.317	11.259	17.465	49.921	41.875	45.257
ENSMUSG00000078674.2	Mup18	2.31474	2.58776e-05	0.00156791	3.566	5.099	5.183	19.602	30.121	15.169
ENSMUSG00000029822.15	Osbpl3	2.20086	0.000535632	0.00951223	1.862	2.645	2.309	7.338	20.933	7.673
ENSMUSG00000056148.8	Rdh9	2.12532	7.379e-07	0.000184422	18.18	46.219	19.808	135.493	96.78	134.95
ENSMUSG00000067219.9	Nipal1	2.11958	0.00048143	0.00894697	0.903	1.156	2.89	8.996	3.902	6.359
ENSMUSG00000091867.2	Cyp2a22	2.06055	0.000858562	0.0125297	1.634	0.76	1.803	5.887	11.379	3.098
ENSMUSG00000005547.14	Cyp2a5	2.04226	0.0019538	0.0204037	216.644	136.273	176.365	570.572	1885.34	445.536
ENSMUSG00000050737.13	Ptges	1.98217	0.00381274	0.0304678	0.579	0.743	0.907	2.497	5.738	1.149
ENSMUSG00000078673.10	Mup19	1.97623	0.000578606	0.00995035	568.007	433.568	913.886	2630.41	2694.26	2173.51
ENSMUSG00000094156.2	Sult2a7	1.97443	0.00222079	0.021873	3.46	13.266	3.672	18.948	35.194	8.915
ENSMUSG00000030278.11	Cidec	1.94519	0.000247278	0.00596797	7.638	17.705	10.744	47.251	54.012	29.728
ENSMUSG00000078896.11	Zfp965	1.91571	3.13873e-05	0.00175002	2.085	1.499	1.043	5.409	8.08	13.359
ENSMUSG00000078881.10	Gm14434	1.89887	0.00328894	0.0277318	4.879	2.156	0.567	8.17	3.574	5.276
ENSMUSG00000056144.14	Trim34a	1.86304	3.62669e-05	0.00193093	4.008	3.375	6.117	14.132	23.729	10.863
ENSMUSG00000078879.10	Zfp973	1.8577	0.00762781	0.044977	1.128	1.457	1.222	4.182	5.826	0.893
ENSMUSG00000083929.3	Gm10600	1.78324	0.000521867	0.00937168	0.268	0.268	0.268	1.126	1.796	0.563
ENSMUSG00000053461.9	Hhipl2	1.75625	0.000634116	0.0104813	0.753	1.148	1.184	1.65	5.201	1.901
ENSMUSG00000044071.8	Fam19a2	1.75454	6.6676e-06	0.00067962	1.235	1.123	1.123	4.715	4.827	3.143
ENSMUSG00000042195.9	Slc35f2	1.75443	0.00200968	0.0207175	0.184	0.238	0.194	0.551	1.285	0.389
ENSMUSG00000060441.15	Trim5	1.74844	5.20239e-06	0.000585128	0.701	1.168	0.759	2.219	3.504	2.57
ENSMUSG00000107188.3	CT571246.5	1.74107	0.000330355	0.00709676	7845.87	3185.2	8812.92	27155	19787.3	16638.5
ENSMUSG00000051076.8	Vtcn1	1.68581	0.00242537	0.0232011	0.323	0.258	0.439	1.11	1.845	0.439
ENSMUSG00000028715.2	Cyp4a14	1.6715	0.000181113	0.00495725	133.043	50.034	65.617	350.093	232.891	182.376
ENSMUSG00000031530.6	Dusp4	1.67146	0.000386698	0.0077858	0.587	0.411	0.88	3.081	2.787	1.849
ENSMUSG00000002068.16	Ccne1	1.62877	0.00210466	0.0212095	0.232	0.487	0.336	1.937	0.928	0.534
ENSMUSG00000045775.15	Slc16a5	1.6092	5.0174e-05	0.00232671	3.742	6.939	12.331	20.665	26.278	21.737
ENSMUSG00000029161.7	Cgref1	1.6068	5.37835e-06	0.000594587	0.448	0.441	0.546	1.382	2.073	1.119
ENSMUSG00000018604.18	Tbx3	1.54551	0.000198942	0.0052684	8.311	4.349	12.177	26.802	32.503	20.939
ENSMUSG00000057068.15	Fam47e	1.5359	0.000219269	0.00563144	19.761	15.687	18.625	54.268	37.084	75.11
ENSMUSG00000028032.13	Papss1	1.52536	1.41931e-05	0.00103643	6.767	7.723	7.603	29.019	20.262	18.948
ENSMUSG00000031016.9	Wee1	1.49093	4.25467e-05	0.00210798	0.915	0.915	1.886	3.62	3.639	3.03
ENSMUSG00000078875.10	Gm14419	1.48973	0.00322798	0.0275142	2.02	1.24	4.913	2.112	5.832	7.531
ENSMUSG00000061815.11	Rufy4	1.43562	6.39748e-07	0.000177295	0.448	0.432	0.496	1.343	1.008	1.088
ENSMUSG00000090175.1	Ugt1a9	1.42864	0.00804528	0.0463766	63.352	37.744	69.358	163.558	334.926	89.701
ENSMUSG00000041431.16	Ccnb1	1.41991	0.00138389	0.016644	0.21	0.165	0.255	0.555	1.051	0.42
ENSMUSG00000008734.9	Gprc5b	1.4143	0.000379102	0.00773106	1.349	2.14	2.791	5.628	7.582	5.582
ENSMUSG00000028957.12	Per3	1.40634	0.000699927	0.0111455	0.961	2.131	3.144	4.885	4.105	4.937
ENSMUSG00000035165.14	Kcne3	1.40494	0.000142451	0.00434915	0.798	1.128	1.568	2.366	4.1	2.641
ENSMUSG00000042745.9	Id1	1.37511	0.00321412	0.0274554	4.549	4.536	6.676	27.329	11.224	8.839
ENSMUSG00000030827.5	Fgf21	1.37402	0.00264917	0.0244821	3.943	4.859	6.473	14.945	13.148	8.508
ENSMUSG00000057933.10	Gsta2	1.36762	0.00483817	0.0349647	97.373	46.906	75.117	214.134	401.67	130.129
ENSMUSG00000038801.6	Scgb1c1	1.35056	0.00142882	0.0170088	0.156	0.092	0.174	0.458	0.412	0.256
ENSMUSG00000034177.15	Rnf43	1.32918	3.32922e-05	0.00181717	6.92	5.729	11.996	23.198	24.333	17.725
ENSMUSG00000051579.10	Tceal8	1.32622	0.00361043	0.0293549	5.408	5.154	6.205	7.834	23.165	10.876
ENSMUSG00000012187.13	Mogat1	1.3168	0.000444459	0.00852764	1.761	1.371	1.194	4.09	5.379	3.263
ENSMUSG00000027035.10	Cers6	1.30418	0.00798753	0.0463068	1.085	2.067	2.58	8.589	2.961	3.503
ENSMUSG00000021228.15	Acot3	1.29592	0.000416696	0.00816729	3.639	2.307	4.852	8.871	9.037	8.942
ENSMUSG00000039620.17	6430573F11Rik	1.28638	6.32667e-06	0.00065859	3.625	4.294	2.621	7.472	10.317	10.261
ENSMUSG00000022303.9	Dcstamp	1.27195	0.00293961	0.025996	0.15	0.15	0.15	0.629	0.36	0.404
ENSMUSG00000068686.12	Cd59b	1.2486	5.82149e-05	0.00250392	9.725	3.971	6.912	16.049	17.979	15.038
ENSMUSG00000054764.9	Mtnr1a	1.23941	9.66316e-06	0.000843439	2.021	1.702	1.609	4.574	4.029	3.51
ENSMUSG00000037725.8	Ckap2	1.22468	0.00779888	0.0456555	0.185	0.2	0.216	0.37	1.186	0.354
ENSMUSG00000010175.13	Prox1	1.21829	0.00062034	0.010343	8.449	7.858	17.237	28.39	22.011	26.912
ENSMUSG00000022033.9	Pbk	1.2026	0.00913192	0.0500762	0.255	0.204	0.238	0.357	1.004	0.289
ENSMUSG00000032715.9	Trib3	1.19882	0.000157892	0.00463962	2.217	1.658	2.685	7.272	5.248	3.621
ENSMUSG00000078452.10	Raet1d	1.19386	0.00255922	0.0240099	15.172	40.023	34.846	91.922	58.175	35.332
ENSMUSG00000093575.1	Gm20695	1.1815	0.0041078	0.031779	0.251	0.251	1.08	1.608	1.055	0.729
ENSMUSG00000060519.11	Tor3a	1.16997	2.61956e-06	0.000370646	2.51	2.15	2.179	4.761	6.94	5.28
ENSMUSG00000028121.8	Bcar3	1.16938	1.10757e-05	0.000903143	28.702	27.456	39.789	86.762	69.443	63.538
ENSMUSG00000032860.5	P2ry2	1.16844	0.000113686	0.00377816	3.399	4.164	5.071	7.026	10.17	12.153
ENSMUSG00000051517.14	Arhgef39	1.15782	0.000603288	0.0102007	0.384	0.285	0.57	0.731	1.302	0.607
ENSMUSG00000028943.18	Espn	1.15575	0.00434885	0.0329494	0.298	0.288	0.329	1.469	0.883	0.421
ENSMUSG00000079495.2	Nat8f6	1.14261	0.00249539	0.0235693	0.793	0.913	0.745	1.418	2.764	2.427
ENSMUSG00000037709.13	Fam13a	1.14245	9.79224e-05	0.00340991	6.545	6.832	8.456	19.397	15.336	12.23
ENSMUSG00000021701.8	Plk2	1.13594	0.00169048	0.0186595	7.201	4.321	8.985	17.126	26.268	11.24
ENSMUSG00000047904.6	Sstr2	1.13428	0.000758503	0.0117067	1.214	0.931	1.242	3.359	1.581	2.851
ENSMUSG00000027505.2	Fam209	1.12731	0.00886181	0.0491227	0.251	0.251	0.251	1.256	0.578	0.352
ENSMUSG00000019178.17	Styxl1	1.12363	0.000178749	0.004927	0.258	0.136	0.136	0.571	0.313	0.285
ENSMUSG00000049685.8	Cyp2g1	1.11813	0.000790235	0.0119792	0.6	0.691	0.454	1.345	1.49	1.381
ENSMUSG00000031595.9	Pdgfrl	1.10816	0.00430312	0.0327868	0.567	0.77	0.324	1.783	0.75	0.669
ENSMUSG00000026979.16	Psd4	1.10776	0.00112266	0.0146668	1.265	1.511	1.001	2.813	4.097	1.511
ENSMUSG00000066000.12	Zfp979	1.09187	0.00330469	0.0278167	1.775	2.551	3.13	5.865	5.365	5.746
ENSMUSG00000061132.13	Blnk	1.0783	0.00609131	0.0396422	1.323	1.512	1.663	3.251	4.726	2.344
ENSMUSG00000054074.9	Skida1	1.07345	0.00238424	0.0229628	0.359	0.199	0.239	0.359	0.977	0.479
ENSMUSG00000027412.12	Lpin3	1.07191	0.00303139	0.0265319	2.913	1.954	2.931	6.914	6.803	3.429
ENSMUSG00000039878.13	Slc39a5	1.0683	0.000731278	0.0114527	0.524	0.464	0.322	0.927	0.806	0.585
ENSMUSG00000078905.8	Gm14393	1.06098	0.00210047	0.0211941	0.658	0.365	0.767	0.95	0.694	1.096
ENSMUSG00000035458.15	Tnni3	1.0569	0.000511519	0.00926048	0.292	0.229	0.292	0.699	0.769	0.565
ENSMUSG00000022388.14	Ttll8	1.0533	0.000395906	0.00788199	0.16	0.16	0.16	0.48	0.368	0.48
ENSMUSG00000036867.7	Smad6	1.051	0.000249303	0.00599542	2.52	1.614	3.13	6.674	5.867	4.174
ENSMUSG00000042978.10	Sbk1	1.04777	0.00540063	0.0370632	5.519	2.547	11.425	10.976	13.361	10.751
ENSMUSG00000043079.17	Synpo	1.0436	0.0050946	0.0358559	2.009	1.718	2.562	7.001	5.298	2.867
ENSMUSG00000086040.8	Wipf3	1.03499	0.000177123	0.00489751	1.702	1.917	1.864	3.942	4.587	2.992
ENSMUSG00000028976.10	Slc2a5	1.03359	0.000977223	0.013506	2.662	2.117	3.962	3.836	8.217	4.654
ENSMUSG00000042429.8	Adora1	1.02786	0.000330946	0.00709881	4.734	6.478	3.692	11.144	11.801	7.384
ENSMUSG00000047492.5	Inhbe	1.02095	0.00703605	0.042945	10.012	8.247	6.369	13.091	22.693	16.678
ENSMUSG00000052957.8	Gas1	1.02073	3.4136e-05	0.00184689	8.114	6.431	11.66	18.271	17.97	15.687
ENSMUSG00000018899.16	Irf1	1.01868	0.00154018	0.0177513	16.91	15.568	18.747	29.326	49.361	29.518
ENSMUSG00000044122.14	Proca1	1.01824	0.000923706	0.0130832	4.361	6.45	5.801	11.236	11.885	9.877
ENSMUSG00000021994.15	Wnt5a	1.01414	0.000843607	0.0123946	0.51	0.55	0.51	1.453	1.335	1.119
ENSMUSG00000048763.11	Hoxb3	1.01245	9.86518e-06	0.000843439	0.667	0.538	0.641	1.308	1.333	1.256
ENSMUSG00000006641.12	Slc5a6	1.00673	6.33253e-05	0.0026312	2.179	3.24	3.383	7.225	4.73	5.189
ENSMUSG00000078898.9	Zfp968	1.00514	9.24259e-05	0.00333049	1.966	1.249	1.7	2.736	3.108	2.364
ENSMUSG00000037440.8	Vnn1	1.00483	0.00600406	0.0393353	12.876	20.241	13.159	21.837	43.345	25.469
ENSMUSG00000047216.8	Cdh19	0.994261	0.000961919	0.0134273	0.296	0.296	0.615	0.889	1.003	0.889
ENSMUSG00000006585.3	Cdt1	0.99399	0.000367552	0.0076037	1.224	1.121	0.879	2.017	2.758	1.81
ENSMUSG00000017716.15	Birc5	0.98606	0.00358394	0.0292367	0.463	0.509	1.095	0.802	2.159	1.187
ENSMUSG00000096606.2	Tpbgl	0.983025	0.00312696	0.0270538	3.16	0.868	2.355	4.71	3.945	4.503
ENSMUSG00000046519.15	Golph3l	0.975705	0.00120547	0.0153391	3.365	2.845	4.624	9.398	6.429	6.525
ENSMUSG00000032080.6	Apoa4	0.971173	0.00515108	0.0360896	93.815	85.166	95.667	197.298	237.32	110.713
ENSMUSG00000025758.10	Plk4	0.967826	7.37993e-06	0.000726916	0.247	0.35	0.319	0.637	0.725	0.47
ENSMUSG00000032172.8	Olfm2	0.963686	0.00287892	0.025633	0.756	0.99	0.808	1.59	2.424	1.147
ENSMUSG00000028444.17	Cntfr	0.962275	0.00671489	0.0418911	1.356	0.703	1.641	4.671	2.645	1.674
ENSMUSG00000041773.8	Enc1	0.957459	0.000883533	0.0127624	1.79	1.357	1.927	4.091	3.481	2.734
ENSMUSG00000041954.18	Tnfrsf18	0.956555	0.00525841	0.0365023	0.266	0.311	0.643	0.51	0.699	0.577
ENSMUSG00000016526.8	Dyrk3	0.950959	0.000894509	0.0128327	0.397	0.409	0.568	1.215	1.249	0.784
ENSMUSG00000039981.6	Zc3h12d	0.942795	0.00141992	0.016919	1.132	1.132	1.132	1.949	2.581	2.265
ENSMUSG00000045751.16	Mms22l	0.940056	0.000553378	0.00973026	0.49	0.49	0.697	1.017	1.506	0.772
ENSMUSG00000030095.10	Tmem43	0.9384	0.00546085	0.0372271	5.299	5.413	5.583	11.945	13.532	6.532
ENSMUSG00000032098.13	Treh	0.938361	0.00218321	0.0216936	0.718	1.692	0.798	1.389	1.644	1.868
ENSMUSG00000045136.6	Tubb2b	0.91199	0.00353009	0.0290029	0.182	0.234	0.247	0.481	0.493	0.26
ENSMUSG00000029833.17	Trim24	0.909157	0.00460173	0.0339325	3.509	6.787	7.602	13.142	7.501	13.032
ENSMUSG00000037621.8	Atoh8	0.907574	0.00755851	0.0447436	6.442	4.813	11.035	23.747	9.063	12.859
ENSMUSG00000075304.2	Sp5	0.905967	0.000898802	0.0128346	0.726	0.497	0.357	1.402	1.134	0.93
ENSMUSG00000047604.3	Frat2	0.904324	0.000402752	0.00796159	0.538	0.583	0.942	1.144	1.615	1.458
ENSMUSG00000067199.4	Frat1	0.902582	5.40975e-05	0.00240784	1.553	2.044	2.417	3.42	3.97	4.068
ENSMUSG00000037337.11	Map4k1	0.893836	0.00344731	0.0285626	0.338	0.289	0.398	0.577	0.816	0.587
ENSMUSG00000034522.10	Zfp395	0.884849	0.00106696	0.0142592	14.212	15.113	20.516	31.126	25.488	35.12
ENSMUSG00000090165.8	Ugt1a10	0.881545	0.00143663	0.0170598	1.365	0.64	0.64	1.28	1.429	1.77
ENSMUSG00000031497.9	Tnfsf13b	0.87993	0.0066085	0.0415319	0.371	0.186	0.334	0.544	0.928	0.643
ENSMUSG00000017146.12	Brca1	0.873902	0.000135038	0.00422161	0.329	0.484	0.45	0.796	0.744	0.726
ENSMUSG00000039004.6	Bmp6	0.873004	0.00723589	0.0436313	3.116	1.019	2.307	5.543	3.236	5.124
ENSMUSG00000033767.14	Tmem131l	0.869923	5.2408e-05	0.00237417	6.815	8.973	10.247	15.719	13.935	16.433
ENSMUSG00000039157.12	Fam102a	0.865643	0.002146	0.0214654	5.802	7.742	6.319	15.871	12.17	8.97
ENSMUSG00000075324.13	Fign	0.863752	0.000199223	0.00526873	0.901	1.067	1.601	1.768	2.468	1.935
ENSMUSG00000006800.14	Sulf2	0.859136	0.00243152	0.0232011	2.423	3.372	3.76	4.923	9.458	5.969
ENSMUSG00000032808.2	Cyp2c38	0.856146	0.000139062	0.00429578	16.555	20.629	16.747	39.671	29.42	25.779
ENSMUSG00000030583.16	Sipa1l3	0.854861	0.000195921	0.00520249	2.526	2.196	3.032	4.547	5.422	4.256
ENSMUSG00000024791.10	Cdca5	0.854137	0.00403212	0.0314658	0.171	0.183	0.16	0.274	0.388	0.205
ENSMUSG00000026430.16	Rassf5	0.84815	0.00243475	0.0232207	3.389	5.07	6.172	8.294	8.708	9.038
ENSMUSG00000078851.4	Hist3h2a	0.847893	9.47559e-06	0.000843045	1.796	2.613	1.885	4.067	3.563	3.088
ENSMUSG00000043487.4	Acot6	0.846803	0.00522953	0.0363694	0.366	0.537	0.464	0.513	0.88	1.185
ENSMUSG00000045273.8	Cenph	0.844648	0.00126827	0.0158394	0.122	0.122	0.122	0.233	0.257	0.196
ENSMUSG00000026102.9	Inpp1	0.84404	0.000662932	0.0107845	2.771	3.933	4.03	7.227	7.827	5.909
ENSMUSG00000032402.12	Smad3	0.842156	0.00205797	0.020933	3.753	4.772	5.978	10.67	8.713	8.579
ENSMUSG00000039741.15	Bahcc1	0.836671	0.00127947	0.0159019	3.112	3.179	2.844	4.657	5.396	4.097
ENSMUSG00000096094.2	A630095N17Rik	0.830355	0.000704873	0.0111969	0.304	0.324	0.202	0.567	0.769	0.587
ENSMUSG00000030641.10	Ddias	0.827165	0.00141652	0.0169139	0.37	0.403	0.538	0.74	1.143	0.656
ENSMUSG00000031821.11	Gins2	0.823753	0.00334138	0.0279811	1.987	2.093	2.563	3.704	3.681	3.293
ENSMUSG00000002870.8	Mcm2	0.820547	0.000776059	0.011884	1.573	1.515	1.748	3.118	3.351	2.273
ENSMUSG00000036555.14	Iqce	0.818726	0.000896478	0.0128327	3.791	2.34	4.983	5.958	6.088	5.633
ENSMUSG00000055200.7	Sertad3	0.818282	0.000314075	0.00689848	4.579	4.895	2.658	5.632	7.106	6.527
ENSMUSG00000034674.18	Tdg	0.815953	0.00134759	0.0164417	9.716	11.097	11.072	20.688	13.633	19.558
ENSMUSG00000045005.9	Fzd5	0.811098	0.00615135	0.0397916	1.261	1.891	2.001	3.7	2.933	2.631
ENSMUSG00000020623.11	Map2k6	0.811076	0.00790726	0.0460562	2.303	0.768	2.371	4.52	2.2	2.78
ENSMUSG00000032500.10	Dclk3	0.810358	0.00891473	0.0493254	3.514	4.685	6.06	6.111	6.926	6.467
ENSMUSG00000042063.11	Zfp386	0.809684	3.6505e-07	0.000145799	5.035	5.626	5.102	8.87	9.918	9.411
ENSMUSG00000011034.6	Slc5a1	0.808959	0.0038809	0.0308616	0.471	0.399	0.423	0.604	0.979	0.652
ENSMUSG00000037606.18	Osbpl5	0.805043	0.00545977	0.0372271	1.08	0.556	1.178	1.44	2.225	1.342
ENSMUSG00000018983.9	E2f2	0.803971	0.000575893	0.00992112	0.493	0.513	0.908	0.967	1.184	1.006
ENSMUSG00000038180.11	Spag4	0.802889	0.000647273	0.0106359	0.968	0.985	0.849	1.205	1.765	2.207
ENSMUSG00000005774.12	Rfx5	0.80181	0.00762567	0.044977	3.184	3.816	6.413	7.271	8.332	7.203
ENSMUSG00000072915.3	Gm12258	0.797635	0.00201205	0.0207175	0.726	0.63	0.84	1.757	1.623	1.375
ENSMUSG00000062861.8	Zfp28	0.79759	0.00429469	0.0327674	1.237	0.957	0.77	1.541	2.498	1.658
ENSMUSG00000079494.2	Nat8f5	0.797434	0.00554907	0.0376107	15.819	13.367	13.26	17.865	36.498	24.389
ENSMUSG00000025003.6	Cyp2c39	0.795484	0.00601229	0.0393353	0.977	1.783	0.868	1.923	2.31	1.333
ENSMUSG00000034173.13	Zbed5	0.794026	0.000585641	0.010001	0.826	0.826	1.117	1.171	1.643	2.052
ENSMUSG00000028893.8	Sesn2	0.788695	1.50889e-05	0.00108166	2.12	2.357	2.705	5.03	3.464	3.97
ENSMUSG00000032702.16	Kank1	0.784464	0.00806976	0.0464767	14.702	15.173	26.326	32.12	30.237	28.281
ENSMUSG00000023032.12	Slc4a8	0.784029	0.00319546	0.0273344	0.172	0.172	0.289	0.47	0.334	0.244
ENSMUSG00000068742.11	Cry2	0.783712	7.83824e-05	0.00302558	6.165	7.695	8.452	13.739	11.421	11.724
ENSMUSG00000047632.10	Fgfbp3	0.780158	5.64926e-05	0.00246389	0.507	0.317	0.507	0.74	0.613	0.782
ENSMUSG00000008999.7	Bmp7	0.771559	0.00144347	0.0170728	0.657	0.677	0.518	1.115	0.996	1.354
ENSMUSG00000020102.15	Slc16a7	0.769306	0.00018951	0.00509446	17.184	14.248	18.573	32.138	35.165	24.354
ENSMUSG00000018486.2	Wnt9b	0.769176	0.00677146	0.0420697	0.452	0.253	0.416	0.669	0.561	0.796
ENSMUSG00000032679.12	Cd59a	0.768182	4.55949e-06	0.000540157	44.741	32.377	46.39	72.134	81.086	70.485
ENSMUSG00000035125.10	Gcfc2	0.767647	0.00314749	0.0271313	1.317	2.075	3.303	4.313	3.808	3.609
ENSMUSG00000034457.10	Eda2r	0.767197	0.0064296	0.0409205	0.384	0.437	0.49	0.715	1.112	0.675
ENSMUSG00000031639.12	Tlr3	0.764607	0.00105387	0.0141412	2.173	2.483	2.6	3.725	5.142	3.706
ENSMUSG00000072662.2	Mansc4	0.764083	0.00157765	0.0180263	0.489	0.623	0.341	0.845	1.023	1.023
ENSMUSG00000032595.10	Cdhr4	0.762456	0.0057389	0.0383579	0.189	0.212	0.118	0.413	0.271	0.271
ENSMUSG00000061175.11	Fnip2	0.759857	0.00747378	0.0444978	3.659	4.911	7.101	8.521	10.351	8.377
ENSMUSG00000078899.9	Gm4631	0.759832	4.19073e-06	0.000509403	7.854	8.193	8.759	14.734	12.901	14.032
ENSMUSG00000074865.11	Zfp934	0.759145	0.00127782	0.0158978	0.364	0.34	0.328	0.534	0.704	0.582
ENSMUSG00000090394.8	4930523C07Rik	0.758685	0.000582274	0.00996962	2.357	1.763	3.205	4.256	4.324	4.816
ENSMUSG00000040447.15	Spns2	0.755645	0.000278868	0.00642063	21.892	17.069	19.398	30.509	34.075	32.426
ENSMUSG00000035104.14	Eva1a	0.755348	5.36211e-06	0.000594587	55.216	54.172	56.697	84.596	99.748	88.166
ENSMUSG00000056267.14	Cep70	0.754112	0.00668806	0.0418037	2.641	2.108	2.363	3.498	5.166	3.845
ENSMUSG00000057265.13	Bbof1	0.749605	4.43845e-05	0.00217154	0.438	0.491	0.491	0.929	0.65	0.876
ENSMUSG00000060548.13	Tnfrsf19	0.749508	0.000574124	0.0099081	1.684	1.464	1.922	2.819	3.276	2.398
ENSMUSG00000003573.15	Homer3	0.748305	0.00509792	0.0358559	1.296	0.905	1.608	2.591	2.904	1.811
ENSMUSG00000082361.6	Btc	0.745468	0.00683602	0.0422295	0.995	1.186	1.503	1.863	3.092	1.736
ENSMUSG00000064267.13	Hvcn1	0.745306	0.00518906	0.0362167	0.912	0.423	0.912	1.956	1.295	1.018
ENSMUSG00000032586.9	Traip	0.745234	0.00602381	0.0393353	0.316	0.207	0.401	0.498	0.498	0.352
ENSMUSG00000026873.9	Phf19	0.744316	2.58706e-05	0.00156791	0.828	0.662	0.709	0.969	0.969	1.159
ENSMUSG00000041147.10	Brca2	0.744039	0.00280721	0.0252821	3.727	2.443	3.396	6.646	4.721	5.88
ENSMUSG00000034110.8	Kctd7	0.743745	0.000124641	0.00405867	1.537	1.145	1.223	2.446	2.321	1.945
ENSMUSG00000060509.4	Xcr1	0.743494	6.5005e-05	0.00266702	0.148	0.242	0.255	0.282	0.389	0.295
ENSMUSG00000041609.16	Bicdl1	0.74131	3.02769e-05	0.00172429	1.768	1.046	1.292	2.445	1.937	1.968
ENSMUSG00000030322.12	Mbd4	0.736687	0.00785037	0.045861	0.626	0.478	0.807	1.12	1.236	0.939
ENSMUSG00000026805.14	Barhl1	0.735859	0.00580388	0.0386199	0.386	0.274	0.225	0.386	0.386	0.499
ENSMUSG00000047963.7	Stbd1	0.733693	0.00493607	0.0354655	43.574	50.893	51.135	102.205	52.183	87.132
ENSMUSG00000029762.6	Akr1b8	0.730117	0.0032592	0.0276358	2.459	1.829	2.121	5.226	3.689	3.535
ENSMUSG00000055652.14	Klhl25	0.729431	0.000892477	0.0128238	6.151	2.81	5.641	7.851	7.891	7.931
ENSMUSG00000054115.11	Skp2	0.7293	0.000483047	0.00894697	0.879	0.646	0.995	1.823	1.326	1.276
ENSMUSG00000052392.5	Acot4	0.727046	0.00012992	0.00415452	8.071	7.489	11.833	13.776	14.801	16.443
ENSMUSG00000025577.7	Cbx2	0.72644	0.000558865	0.00979154	2.846	2.332	3.312	5.575	4.688	4.478
ENSMUSG00000025077.13	Dclre1a	0.720762	0.0012478	0.0156637	5.865	5.161	5.639	9.201	7.64	10.9
ENSMUSG00000031669.10	Gins3	0.720626	0.00013107	0.00417271	0.515	0.39	0.432	0.822	0.752	0.78
ENSMUSG00000032380.8	Dapk2	0.717668	0.00150471	0.017466	7.461	6.967	8.139	15.815	10.466	9.033
ENSMUSG00000045822.4	Zswim3	0.714801	9.19743e-05	0.00333049	0.797	0.549	0.709	1.028	1.524	0.992
ENSMUSG00000039745.8	Htatip2	0.713171	0.00124026	0.0156192	23.161	34.265	20.805	42.593	50.685	30.464
ENSMUSG00000028339.17	Col15a1	0.711307	0.00816649	0.0467722	3.125	4.201	1.981	3.296	5.106	6.506
ENSMUSG00000034833.10	Tespa1	0.710563	0.00302623	0.0264985	0.17	0.13	0.209	0.404	0.222	0.339
ENSMUSG00000022179.5	4931414P19Rik	0.710493	0.00481974	0.0349089	1.89	1.776	1.189	3.637	2.664	3.05
ENSMUSG00000021895.10	Arhgef3	0.70741	0.00485184	0.0350118	8.63	5.951	9.63	18.226	10.698	14.699
ENSMUSG00000059994.10	Fcrl1	0.707388	0.00590831	0.0389921	0.236	0.33	0.252	0.692	0.44	0.409
ENSMUSG00000040675.17	Mthfd1l	0.705934	0.00019385	0.00516151	0.33	0.546	0.46	0.847	0.704	0.632
ENSMUSG00000026883.17	Dab2ip	0.705919	0.00204932	0.0208776	2.946	2.366	3.08	5.29	5.335	3.728
ENSMUSG00000032925.16	Itgbl1	0.705545	0.00301169	0.0263948	0.166	0.166	0.207	0.387	0.387	0.262
ENSMUSG00000061536.13	Sec22c	0.705429	0.00742295	0.044303	2.78	3.871	3.748	7.125	5.498	5.601
ENSMUSG00000028766.10	Alpl	0.704784	0.000743805	0.0115711	4.736	4.008	6.47	10.83	8.128	7.877
ENSMUSG00000052563.13	D930048N14Rik	0.700356	0.000385076	0.00777715	5.157	2.737	2.936	7.379	6.07	6.07
ENSMUSG00000030446.17	Zfp273	0.698307	0.00111829	0.0146367	1.644	1.152	1.613	2.827	2.335	2.397
ENSMUSG00000048482.14	Bdnf	0.696275	0.000451354	0.00859307	0.605	1.21	1.04	1.621	1.476	1.306
ENSMUSG00000021036.10	Sptlc2	0.695926	0.00262141	0.0243252	8.109	8.049	8.168	15.04	20.57	10.807
ENSMUSG00000049907.8	Rasl11b	0.69331	0.00198413	0.0206213	1.76	1.068	1.236	2.388	2.241	1.424
ENSMUSG00000038368.16	Focad	0.693182	0.00449775	0.0335609	2.918	2.89	1.913	3.742	5.668	3.239
ENSMUSG00000025372.16	Baiap2	0.691801	0.000658112	0.0107418	11.795	9.006	17.476	25.363	17.267	20.324
ENSMUSG00000067928.6	Zfp760	0.691758	0.00296174	0.0261028	1.862	1.939	2.618	3.588	3.258	3.627
ENSMUSG00000039384.8	Dusp10	0.69074	0.0048315	0.0349647	1.714	1.984	2.095	3.174	4.237	2.317
ENSMUSG00000004768.14	Rab23	0.687482	0.00522787	0.0363694	3.943	3.679	5.001	7.887	7.578	7.71
ENSMUSG00000025656.17	Arhgef9	0.686163	0.00832679	0.047289	1.496	1.339	1.061	1.93	2.904	2.504
ENSMUSG00000052435.7	Cebpe	0.684803	0.0033397	0.0279811	6.243	6.676	3.26	8.12	11.079	7.651
ENSMUSG00000048728.15	Zfp454	0.682824	0.000748663	0.0116098	0.957	0.907	0.874	1.732	1.171	1.237
ENSMUSG00000024742.15	Fen1	0.681125	0.00133142	0.0163259	1.557	1.962	1.474	2.727	2.791	2.239
ENSMUSG00000049985.15	Ankrd55	0.67918	0.00581876	0.0386804	0.115	0.125	0.163	0.278	0.297	0.173
ENSMUSG00000020228.11	Helb	0.678239	0.00265132	0.0244821	3.368	4.32	4.668	7.598	5.529	6.767
ENSMUSG00000015647.9	Lama5	0.67614	0.002645	0.0244629	1.556	1.403	1.037	2.346	2.947	1.98
ENSMUSG00000026976.15	Pax8	0.675607	0.00317345	0.0272421	0.444	0.337	0.398	0.689	0.566	0.49
ENSMUSG00000053985.10	Zfp14	0.67557	0.00582397	0.0386847	0.897	0.814	0.897	1.529	1.379	1.246
ENSMUSG00000020889.11	Nr1d1	0.674229	0.000563886	0.00983525	38.784	41.159	68.008	82.399	80.144	73.382
ENSMUSG00000054931.7	Zkscan4	0.668905	0.000259649	0.0061288	0.364	0.298	0.447	0.43	0.645	0.612
ENSMUSG00000098188.1	Sowahc	0.668835	0.00512537	0.0359774	1.498	1.714	1.673	2.685	3.076	2.226
ENSMUSG00000028337.14	Coro2a	0.667714	0.00536697	0.0370226	0.35	0.414	0.812	0.908	0.796	0.637
ENSMUSG00000021360.16	Gcnt2	0.665853	0.00480006	0.0348179	4.273	5.649	7.438	11.044	7.465	9.962
ENSMUSG00000031995.9	St14	0.665558	0.00881272	0.0489455	0.293	0.293	0.418	0.575	0.69	0.45
ENSMUSG00000027253.15	Lrp4	0.661101	0.00254427	0.0239155	1.743	2.071	2.729	3.535	3.37	3.041
ENSMUSG00000000282.12	Mnt	0.658253	0.00289175	0.0257004	1.905	3.379	2.84	4.116	4.583	3.954
ENSMUSG00000021285.15	Ppp1r13b	0.652374	0.00815452	0.0467447	3.268	5.604	3.988	9.276	6.008	4.884
ENSMUSG00000074165.10	Zfp788	0.652207	0.00707816	0.0430995	1.358	1.206	1.46	2.869	1.803	1.689
ENSMUSG00000038776.13	Ephx1	0.649756	0.00118525	0.0151792	322.729	286.6	243.169	423.407	528.194	366.568
ENSMUSG00000034949.18	Zfr2	0.649266	0.00465843	0.0341066	1.215	0.618	0.874	1.322	1.087	1.365
ENSMUSG00000038797.13	Zscan2	0.642986	0.000384198	0.00777715	1.649	1.094	1.449	2.466	2.42	2.173
ENSMUSG00000051147.10	Nat2	0.64204	3.12205e-05	0.0017457	16.164	13.631	14.009	23.518	22.819	20.909
ENSMUSG00000075273.4	Ttc30b	0.641218	0.000154737	0.00458827	2.53	2.108	3.311	4.014	3.639	4.42
ENSMUSG00000031591.14	Asah1	0.64081	0.0022541	0.0220807	27.408	28.3	43.222	50.862	58.651	42.479
ENSMUSG00000069806.5	Cacng7	0.64035	0.00313368	0.027076	0.23	0.46	0.376	0.521	0.497	0.473
ENSMUSG00000096998.3	Cacng7	0.64035	0.00313368	0.027076	0.23	0.46	0.376	0.521	0.497	0.473
ENSMUSG00000032113.16	Chek1	0.639792	0.00799294	0.0463068	0.7	0.742	0.854	1.232	0.896	1.134
ENSMUSG00000033373.16	Fntb	0.639699	3.8325e-05	0.00198589	1.651	1.697	1.433	2.706	2.5	2.259
ENSMUSG00000067430.7	Zfp763	0.637227	0.000671733	0.0108682	1.036	0.618	1.018	1.364	1.473	1.4
ENSMUSG00000021236.16	Entpd5	0.637217	0.00540081	0.0370632	66.001	84.923	73.396	109.767	156.395	104.899
ENSMUSG00000027074.14	Slc43a3	0.633227	0.00654463	0.0413296	13.649	6.521	16.48	23.978	20.184	15.798
ENSMUSG00000028894.18	Inpp5b	0.633186	0.000520696	0.00936598	22.901	19.071	21.21	31.581	35.37	25.611
ENSMUSG00000041115.16	Iqsec2	0.632018	0.000219105	0.00563144	4.198	5.27	4.213	7.187	8.38	6.115
ENSMUSG00000043673.11	Kcns3	0.631907	0.00432251	0.0328527	0.201	0.127	0.169	0.338	0.233	0.233
ENSMUSG00000044674.6	Fzd1	0.631385	0.0065602	0.0413582	2.15	2.272	2.759	4.158	4.503	3.611
ENSMUSG00000040187.15	Arntl2	0.630121	0.00886153	0.0491227	0.382	0.781	0.781	0.83	0.98	0.996
ENSMUSG00000028884.14	Rpa2	0.629372	0.00094952	0.0133303	3.354	3.717	2.617	6.291	4.742	3.824
ENSMUSG00000063383.5	Zfp947	0.627844	0.000263406	0.00618098	0.635	0.566	0.589	1.109	0.785	0.878
ENSMUSG00000057137.9	Tmem140	0.62579	0.00359333	0.0292817	8.585	10.614	17.88	16.961	19.736	16.354
ENSMUSG00000048445.6	Ccdc57	0.624075	0.00262683	0.0243639	0.88	1.016	0.561	1.744	1.122	0.94
ENSMUSG00000020491.15	2810021J22Rik	0.62265	0.0014371	0.0170598	1.163	0.906	1.077	1.796	2.001	1.676
ENSMUSG00000021007.14	Spata7	0.621688	0.000717444	0.0113121	0.729	0.505	0.603	1.107	1.051	1.023
ENSMUSG00000049154.11	Fam183b	0.621354	0.00601598	0.0393353	0.278	0.357	0.132	0.397	0.304	0.357
ENSMUSG00000061288.13	Taok3	0.620427	0.00699097	0.0427682	9.974	17.701	15.134	26.367	18.713	19.355
ENSMUSG00000021179.8	Nrde2	0.618135	0.00850163	0.0479204	4.695	3.738	3.565	6.8	6.046	6.125
ENSMUSG00000030643.14	Rab30	0.610624	0.000561452	0.00981182	2.076	2.454	2.241	2.949	3.153	3.715
ENSMUSG00000033170.14	Card10	0.61038	0.00372249	0.029918	3.372	3.203	3.169	6.558	5.186	4.694
ENSMUSG00000063535.7	Zfp773	0.60832	0.00275444	0.0249561	0.491	0.584	0.538	1.145	0.678	0.748
ENSMUSG00000041757.16	Plekha6	0.608193	0.00867858	0.0485152	11.826	11.027	17.139	25.289	18.078	17.579
ENSMUSG00000014075.15	Tctex1d2	0.606269	0.00476437	0.034636	1.249	1.687	0.982	1.916	3.051	1.821
ENSMUSG00000040010.10	Slc7a5	0.605781	0.00545447	0.0372271	0.714	0.658	0.883	1.428	1.202	1.71
ENSMUSG00000029463.5	Fam216a	0.60577	8.68627e-05	0.00321348	2.87	2.11	2.005	3.434	3.054	2.962
ENSMUSG00000045466.18	Zfp956	0.605442	0.000788246	0.0119676	1.821	1.482	1.853	2.014	3.11	2.675
ENSMUSG00000034320.14	Slc26a2	0.605407	0.0084934	0.0479011	0.594	0.768	0.724	1.507	1.159	0.869
ENSMUSG00000063558.4	Aox1	0.605356	0.000590213	0.010044	31.945	35.322	33.625	53.807	59.713	42.419
ENSMUSG00000029376.8	Mthfd2l	0.604831	0.000161328	0.00465873	2.489	3.78	2.827	4.133	5.347	3.688
ENSMUSG00000039458.15	Mtmr12	0.604124	0.0085934	0.0482711	2.043	2.891	3.893	4.529	4.664	4.163
ENSMUSG00000037171.6	Nodal	0.601393	0.00102414	0.0138993	0.317	0.317	0.285	0.539	0.333	0.46
ENSMUSG00000031478.16	Nek3	0.601132	0.00540492	0.0370632	1.013	0.62	1.189	1.23	1.519	0.909
ENSMUSG00000020167.14	Tcf3	0.598909	0.00251206	0.023681	6.285	7.459	6.028	12.599	10.351	7.517
ENSMUSG00000029521.7	Chek2	0.598687	0.00707759	0.0430995	0.981	0.89	0.951	1.479	1.78	1.207
ENSMUSG00000072763.2	5430403G16Rik	0.598329	3.45331e-05	0.00186177	0.719	0.565	0.753	0.993	1.027	1.113
ENSMUSG00000037325.10	Bbs7	0.595822	0.000147791	0.00446346	1.452	1.353	1.791	2.567	2.328	2.427
ENSMUSG00000028629.9	Exo5	0.594797	0.000609374	0.0102667	1.551	1.128	1.168	1.591	2.195	1.883
ENSMUSG00000030302.16	Atp2b2	0.593375	0.00753872	0.0446941	0.695	0.762	0.678	0.729	1	1.152
ENSMUSG00000022621.16	Rabl2	0.592453	0.00615672	0.0397916	1.934	1.73	1.73	2.137	2.937	2.806
ENSMUSG00000085795.8	Zfp703	0.590268	0.00540405	0.0370632	2.06	2.999	1.734	4.914	4.137	2.8
ENSMUSG00000038884.14	A230050P20Rik	0.590017	0.00675187	0.0419968	95.304	69.718	85.821	104.498	158.086	106.153
ENSMUSG00000027375.14	Mal	0.587889	0.00674818	0.0419968	0.396	0.3	0.384	0.516	0.611	0.468
ENSMUSG00000021483.8	Cdk20	0.587291	0.000224653	0.00571721	4.306	3.493	4.092	6.73	7.258	5.689
ENSMUSG00000019235.9	Rps6kl1	0.58695	0.00560397	0.0378308	0.691	0.571	0.531	0.962	1.202	0.701
ENSMUSG00000074635.2	3110070M22Rik	0.584559	0.00821803	0.0469707	0.278	0.339	0.253	0.296	0.389	0.426
ENSMUSG00000022003.7	Slc25a30	-1.97762	9.55154e-05	0.00336805	5.673	18.704	5.901	2.002	2.327	1.921
ENSMUSG00000021453.2	Gadd45g	-1.88335	4.59378e-05	0.00220889	8.272	14.317	6.422	3.548	1.77	2.185
ENSMUSG00000079450.11	Cldn34c1	-1.70785	1.39693e-05	0.00103164	0.322	0.264	0.359	0.099	0.12	0.095
ENSMUSG00000068877.12	Selenbp2	-1.68539	0.00110512	0.0145346	69.452	23.159	56.553	13.1	14.635	14.85
ENSMUSG00000020429.7	Igfbp1	-1.64516	0.000976107	0.0135002	23.617	50.176	48.127	17.608	6.037	12.832
ENSMUSG00000028445.7	Enho	-1.56533	0.000606057	0.0102336	13.91	9.429	6.165	4.997	1.859	2.918
ENSMUSG00000090877.3	Hspa1b	-1.45045	0.00847766	0.0478292	10.182	27.829	15.192	7.842	3.923	4.734
ENSMUSG00000038415.10	Foxq1	-1.4243	0.00268445	0.0246183	2.747	11.994	2.543	1.831	1.19	1.16
ENSMUSG00000039431.16	Mtmr7	-1.40072	0.000340286	0.00724379	1.226	1.264	1.259	0.372	0.702	0.44
ENSMUSG00000025004.15	Cyp2c40	-1.37009	0.00722561	0.0436173	4.906	4.413	1.618	1.249	0.652	1.815
ENSMUSG00000050069.3	Grem2	-1.34197	0.00635418	0.0406117	1.556	0.635	4.16	0.675	0.755	0.619
ENSMUSG00000027186.14	Elf5	-1.33883	0.000491531	0.00903231	0.2	0.223	0.303	0.057	0.097	0.143
ENSMUSG00000090264.1	Eif4ebp3	-1.32862	1.6461e-05	0.00115053	6.192	4.808	8.024	2.001	2.171	3.315
ENSMUSG00000091971.3	Hspa1a	-1.28583	0.00392998	0.031045	0.898	2.034	1.886	0.708	0.922	0.486
ENSMUSG00000046179.17	E2f8	-1.27755	0.00898958	0.0495631	0.804	2.38	1.295	0.259	0.754	0.5
ENSMUSG00000019947.10	Arid5b	-1.27301	0.000534566	0.00950193	6.376	17.192	9.582	4.865	3.484	3.927
ENSMUSG00000078964.2	Ces1b	-1.24621	5.73481e-07	0.000172665	32.499	26.644	28.556	12.874	11.206	13.686
ENSMUSG00000005968.14	Tuft1	-1.20198	3.64199e-05	0.0019312	2.12	2.979	2.691	1.135	1.312	0.886
ENSMUSG00000043013.10	Onecut1	-1.20129	0.00275104	0.0249417	2.598	3.428	4.011	1.345	1.794	1.451
ENSMUSG00000029372.7	Ppbp	-1.1987	0.00385453	0.0307143	0.514	0.558	0.411	0.161	0.367	0.257
ENSMUSG00000062181.14	Ces3b	-1.18166	0.000721556	0.0113513	155.736	175.972	177.35	47.152	87.694	88.155
ENSMUSG00000020027.18	Socs2	-1.15244	0.00160969	0.0182408	3.831	7.908	5.823	1.587	3.153	2.486
ENSMUSG00000034780.6	B3galt1	-1.1458	0.00325034	0.0276326	2.435	3.058	5.538	0.968	2.175	2.013
ENSMUSG00000039470.15	Zdhhc2	-1.11317	2.00146e-05	0.00133683	0.738	1.302	0.767	0.457	0.311	0.466
ENSMUSG00000030237.14	Slco1a4	-1.07131	0.00133894	0.0163772	21.623	30.998	35.753	11.188	13.275	15.191
ENSMUSG00000038092.6	Hsd3b5	-1.06544	0.00484085	0.0349712	88.147	29.92	75.711	24.158	21.03	46.653
ENSMUSG00000030559.8	Rab38	-1.06467	0.00793134	0.0461411	0.528	1.1	1.011	0.337	0.247	0.73
ENSMUSG00000032724.5	Abtb2	-1.057	0.000867761	0.0126263	4.85	8.479	6.345	2.454	4.097	2.556
ENSMUSG00000026669.14	Mcm10	-1.0286	4.37636e-05	0.00215193	44.684	59.316	38.521	22.866	17.365	27.173
ENSMUSG00000059810.18	Rgs3	-0.986901	0.00700949	0.0428547	7.577	10.294	7.492	3.512	6.385	2.639
ENSMUSG00000002578.17	Ikzf4	-0.983189	0.00411976	0.0318424	0.235	0.684	0.376	0.185	0.275	0.151
ENSMUSG00000030257.16	Srgap3	-0.968839	6.32304e-06	0.00065859	1.546	1.379	1.118	0.801	0.559	0.633
ENSMUSG00000058260.2	Serpina9	-0.966738	0.00717627	0.0434132	0.235	0.293	0.252	0.139	0.095	0.169
ENSMUSG00000079243.3	Xirp1	-0.937546	0.00149355	0.0174191	0.204	0.297	0.397	0.154	0.208	0.17
ENSMUSG00000041540.16	Sox5	-0.930553	0.00318652	0.0273025	1.975	2.028	3.176	1.228	1.641	1.174
ENSMUSG00000037443.13	Cep85	-0.920336	0.00749398	0.0445499	69.069	41.179	38.367	13.669	28.244	29.312
ENSMUSG00000043122.7	A530016L24Rik	-0.91397	0.00768077	0.0451261	0.43	0.131	0.202	0.167	0.193	0.167
ENSMUSG00000032300.7	1700017B05Rik	-0.906745	0.00273975	0.0249197	3.151	6.42	2.943	1.998	2.568	1.478
ENSMUSG00000040613.14	Apobec1	-0.886985	0.000778896	0.0119088	11.905	20.651	20.136	7.447	11.167	7.916
ENSMUSG00000031535.7	Dkk4	-0.862084	0.00438493	0.033103	0.26	0.253	0.157	0.123	0.109	0.13
ENSMUSG00000029656.13	C8b	-0.859477	9.83308e-05	0.00341805	78.879	95.035	95.365	47.971	40.815	62.596
ENSMUSG00000037025.11	Foxa2	-0.851844	0.00429171	0.0327575	17.583	24.543	15.061	7.369	13.966	8.559
ENSMUSG00000071691.11	Gm960	-0.846656	0.00167194	0.018562	0.52	0.482	0.395	0.327	0.212	0.241
ENSMUSG00000022032.14	Scara5	-0.831853	0.00663162	0.0416452	0.715	1.007	0.956	0.327	0.483	0.577
ENSMUSG00000020333.17	Acsl6	-0.827918	0.00608647	0.0396387	0.341	0.603	0.214	0.156	0.117	0.136
ENSMUSG00000048647.9	Exd1	-0.827123	0.000346591	0.00732307	0.859	1.592	0.871	0.414	0.589	0.721
ENSMUSG00000005553.14	Atp4a	-0.818465	0.00842118	0.0476453	1.202	1.521	1.036	0.563	0.716	0.575
ENSMUSG00000048782.15	Insc	-0.811416	0.00258068	0.0241199	18.283	25.671	11.905	8.443	9.183	12.877
ENSMUSG00000016262.14	Sertad4	-0.79905	0.00273966	0.0249197	0.187	0.468	0.267	0.154	0.12	0.1
ENSMUSG00000043432.7	Leng9	-0.788651	0.00516697	0.036134	2.002	4.926	1.51	1.722	1.134	1.317
ENSMUSG00000048489.12	8430408G22Rik	-0.782255	0.0079607	0.0462041	101.111	64.296	122.873	45.532	52.363	55.814
ENSMUSG00000039323.18	Igfbp2	-0.743141	0.000227231	0.00576081	183.588	111.246	161.475	97.79	82.118	102.861
ENSMUSG00000056313.5	Tcim	-0.738016	0.000784999	0.0119516	24.586	11.332	23.897	12.75	10.418	12.511
ENSMUSG00000062604.11	Srpk2	-0.732426	0.0021785	0.0216636	4.186	2.89	4.35	2.198	3.013	2.005
ENSMUSG00000020176.17	Grb10	-0.720281	0.00208913	0.0211476	0.651	1.121	0.958	0.549	0.615	0.506
ENSMUSG00000003053.17	Cyp2c29	-0.706306	0.000614235	0.0103183	765.872	528.107	921.843	528.84	365.261	486.41
ENSMUSG00000053553.11	3110082I17Rik	-0.697382	0.0023836	0.0229628	1.734	2.868	1.342	1.091	0.746	1.185
ENSMUSG00000020689.4	Itgb3	-0.675452	0.00373913	0.0299902	0.613	0.395	0.613	0.368	0.313	0.354
ENSMUSG00000031441.15	Atp11a	-0.661123	0.00473114	0.0344697	3.039	7.093	3.395	2.523	2.718	2.747
ENSMUSG00000026489.13	Coq8a	-0.659216	0.00911245	0.0499954	345.907	273.251	317.487	132.175	260.745	213.358
ENSMUSG00000074682.4	Zcchc3	-0.656955	0.000162511	0.00465873	0.222	0.216	0.2	0.152	0.141	0.119
ENSMUSG00000004100.12	Ppan	-0.639122	6.49994e-05	0.00266702	5.941	6.186	5.048	3.75	3.876	3.422
ENSMUSG00000031493.10	Ggn	-0.636762	0.00172566	0.0188328	0.242	0.117	0.141	0.117	0.117	0.094
ENSMUSG00000060613.10	Cyp2c70	-0.633085	0.000832569	0.0123235	243.805	233.296	295.586	140.385	160.766	185.59
ENSMUSG00000030499.9	Kctd15	-0.632734	0.000318858	0.00695771	3.843	5.822	3.83	2.892	2.594	3.092
ENSMUSG00000031889.9	D230025D16Rik	-0.618094	0.000126933	0.00410599	18.336	25.227	21.62	14.528	12.47	14.743
ENSMUSG00000053303.14	Slc22a26	-0.610092	0.00688303	0.0423328	1.01	1.761	1.01	0.764	0.56	0.792
ENSMUSG00000026272.6	Agxt	-0.608544	0.00564788	0.0380092	166.743	136.368	123.932	86.346	89.421	101.183
ENSMUSG00000041798.15	Gck	-0.604334	0.00538974	0.0370632	98.894	60.338	65.967	42.567	53.964	42.624
ENSMUSG00000033585.5	Ndn	-0.59507	0.00176859	0.0191653	0.385	0.243	0.273	0.223	0.192	0.202
ENSMUSG00000079550.9	Mpp4	-0.591849	0.000754142	0.0116578	0.989	1.363	1.016	0.8	0.745	0.772
ENSMUSG00000035354.9	Uvrag	-0.588067	0.000411111	0.00809414	9.173	12.988	11.706	7.77	6.417	7.228
