# Supplementary material for: Remodeling of whole-body lipid metabolism and a diabetic-like phenotype caused by loss of CDK1 and hepatocyte division
Source: eLife. 2020 Dec 21;9:e63835. doi: 10.7554/eLife.63835 (PMC7771968; doi:10.7554/eLife.63835)
Supplement: Supplementary file 7. [file elife-63835-supp7.xlsx]

## Sheet: KEGG pathway
Up-regulated genes
Term	p-value	q-value	Genes
Retinol metabolism	1.63431e-07	4.95195e-05	CYP2B9;UGT1A10;CYP2B13;CYP2A5;CYP2A4;RDH9;AOX1;CYP4A14;UGT1A9;CYP2C39;CYP2C38
Chemical carcinogenesis	1.54231e-05	0.0023366	CYP2B9;UGT1A10;CYP2B13;NAT2;GSTA2;EPHX1;UGT1A9;CYP2C39;CYP2C38
Signaling pathways regulating pluripotency of stem cells	5.59946e-05	0.00565545	FZD1;SMAD3;FZD5;WNT5A;ID1;WNT9B;TCF3;NODAL;TBX3;INHBE
Breast cancer	0.00010123	0.00766814	FZD1;FRAT1;FRAT2;FZD5;WNT5A;WNT9B;E2F2;BRCA1;BRCA2;FGF21
Gastric cancer	0.000119715	0.00725471	FZD1;FRAT1;FRAT2;SMAD3;FZD5;CCNE1;WNT5A;WNT9B;E2F2;FGF21
Cell cycle	0.000129021	0.00651554	CCNB1;WEE1;SMAD3;CCNE1;CHEK2;CHEK1;E2F2;SKP2;MCM2
TGF-beta signaling pathway	0.000534624	0.0231416	SMAD3;ID1;SMAD6;BMP7;BMP6;NODAL;INHBE
Hippo signaling pathway	0.000859168	0.032541	FZD1;SMAD3;FZD5;WNT5A;ID1;WNT9B;BIRC5;BMP7;BMP6
Herpes simplex virus 1 infection	0.00126195	0.0424857	ZFP788;ZFP763;ZFP956;GM14434;GM12258;2810021J22RIK;ZFP947;GM14393;ZFP14;ZFP273;ZFP454;ZFP773;TLR3;ZFP386;ZFP760;ZFP28
Hepatocellular carcinoma	0.00143172	0.0433813	FZD1;FRAT1;FRAT2;SMAD3;FZD5;GSTA2;WNT5A;WNT9B;E2F2
Down-regulated genes
Term	p-value	q-value	Genes
Steroid hormone biosynthesis	0.000315477	0.0477947	HSD3B5;CYP2C40;CYP2C70;CYP2C29

## Sheet: ChIP enrichment
Term	P-value	Adjusted P-value	Genes
LXR 22158963 ChIP-Seq LIVER Mouse	6.4353e-10	4.15077e-07	BCAR3;DCLRE1A;MTMR12;RDH9;MOGAT1;WIPF3;ONECUT1;MCM10;C8B;TMEM140;SLC2A5;FOXQ1;DUSP10;DBP;SPTLC2;INSC;SESN2;TRIM24;GRB10;SLC16A7;CYP2C70;SKP2;SYNPO;HTATIP2;IGFBP1;TOR3A;DAPK2;IGFBP2;WNT5A;TNFRSF19;ARID5B;PROX1;PDGFRL;KCTD7;GREM2;ARHGEF3;BIRC5;AGXT;ACOT4;PTGES;COL15A1;ZFP703;ANKRD55;FIGN;SLC5A1;MTMR7;SOCS2;GCNT2;E2F2;FAM47E;SRGAP3;FNIP2;MAP2K6;FZD1;UVRAG;MPP4;FZD5;KLHL25;EPHX1;PLEKHA6;ATP2B2;NR1D1;…
RXR 22158963 ChIP-Seq LIVER Mouse	2.6005e-05	0.0083866	BCAR3;UGT1A10;MTMR12;RASL11B;RDH9;A230050P20RIK;TREH;FAM13A;ONECUT1;TMEM140;CYP2C39;FRAT1;CYP2B13;DBP;NIPAL1;D230025D16RIK;SLC16A7;AOX1;SYNPO;IGFBP1;TNFRSF19;CYP4A14;KCTD7;CYP2A4;RFX5;GAS1;BIRC5;AGXT;KCTD15;ACOT4;TLR3;ACOT3;PTGES;8430408G22RIK;SOCS2;ATOH8;XIRP1;EIF4EBP3;UGT1A9;FNIP2;FGF21;UVRAG;MPP4;SMAD3;FZD5;OSBPL5;EPHX1;ATP2B2;NR1D1;CORO2A;BAIAP2;CYP2C29;CIDEC;SULF2;INHBE;ABTB2;VNN1;SBK1;ZFP39…
PPARA 22158963 ChIP-Seq LIVER Mouse	4.86181e-05	0.0104529	BCAR3;A530016L24RIK;PPP1R13B;MTMR12;RASL11B;RDH9;MOGAT1;A230050P20RIK;TREH;TMEM140;ZC3H12D;HELB;NIPAL1;ADORA1;SLC16A7;AOX1;SYNPO;BAHCC1;IGFBP1;DAPK2;TNFRSF19;CYP4A14;DKK4;MTNR1A;IRF1;GAS1;BIRC5;AGXT;ACOT4;TLR3;8430408G22RIK;LAMA5;ZFP703;CYP2B9;SOCS2;SELENBP2;MNT;GCNT2;FNIP2;ZFP386;E2F8;SMAD3;FZD5;KLHL25;EPHX1;4930523C07RIK;PLEKHA6;ATP2B2;NR1D1;CORO2A;BAIAP2;CIDEC;SULF2;INHBE;VNN1;SBK1;NAT2;ID1;ZF…
OCT4 18692474 ChIP-Seq MEFs Mouse	0.000445783	0.0479216	BARHL1;BCAR3;CNTFR;ITGB3;ONECUT1;BRCA1;ESPN;FRAT1;RGS3;DUSP10;CHEK1;ENC1;TRIM24;PBK;SKP2;APOBEC1;TOR3A;TNFRSF18;IGFBP2;WNT5A;TNFRSF19;PROX1;ATP11A;TRAIP;SLC7A5;GPRC5B;MTNR1A;IRF1;RFX5;CRY2;HOXB3;GAS1;LAMA5;SLC26A2;SLC5A1;TCEAL8;MNT;RAB23;GCNT2;TNNI3;ST14;FZD5;BDNF;EPHX1;RPA2;ATP2B2;SMAD6;CIDEC;TBX3;GADD45G;ATP4A;SLC4A8;WEE1;ID1;TCF3;NODAL;HSPA1B;ZSCAN2;FOXA2
