# Supplementary material for: Remodeling of whole-body lipid metabolism and a diabetic-like phenotype caused by loss of CDK1 and hepatocyte division
Source: eLife. 2020 Dec 21;9:e63835. doi: 10.7554/eLife.63835 (PMC7771968; doi:10.7554/eLife.63835)
Supplement: Supplementary file 8. [file elife-63835-supp8.xlsx]

## Sheet: TG dMRM and SIM
Compound Group	Compound Name	ISTD?	Precursor Ion	MS1 Res	Product Ion	MS2 Res	Ret Time (min)	Delta Ret Time	Fragmentor	Collision Energy	Cell Accelerator Voltage	Polarity
TG	TG 48:0	FALSE	824.77	Unit	824.77	Unit	10.913	1	380	2	5	Positive
TG	TG 48:0 - 14:0	FALSE	824.77	Unit	579.534	Unit	10.913	1	380	21	5	Positive
TG	TG 48:0 - 16:0	FALSE	824.77	Unit	551.503	Unit	10.931	1	380	21	5	Positive
TG	TG 48:0 - 16:0 - d5	TRUE	829.802	Unit	556.534	Unit	10.912	1	380	21	5	Positive
TG	TG 48:0 - d5	TRUE	829.802	Unit	829.802	Unit	10.912	1	380	21	5	Positive
TG	TG 48:1	FALSE	822.755	Unit	822.755	Unit	10.593	1	380	2	5	Positive
TG	TG 48:1 - 14:0	FALSE	822.755	Unit	577.518	Unit	10.574	1	380	21	5	Positive
TG	TG 48:1 - 16:0	FALSE	822.755	Unit	549.487	Unit	10.593	1	380	21	5	Positive
TG	TG 48:1 - 16:1	FALSE	822.755	Unit	551.503	Unit	10.593	1	380	21	5	Positive
TG	TG 48:1 - 18:1	FALSE	822.755	Unit	523.5	Unit	10.593	1	380	21	5	Positive
TG	TG 48:2	FALSE	820.739	Unit	820.739	Unit	10.226	1	380	2	5	Positive
TG	TG 48:2 - 14:0	FALSE	820.739	Unit	575.503	Unit	10.245	1	380	21	5	Positive
TG	TG 48:2 - 14:1	FALSE	820.739	Unit	577.5	Unit	10.245	1	380	21	5	Positive
TG	TG 48:2 - 16:0	FALSE	820.739	Unit	547.472	Unit	10.245	1	380	21	5	Positive
TG	TG 48:2 - 16:1	FALSE	820.739	Unit	549.487	Unit	10.186	1	380	21	5	Positive
TG	TG 48:2 - 18:1	FALSE	820.739	Unit	521.456	Unit	10.205	1	380	21	5	Positive
TG	TG 48:2 - 18:2	FALSE	820.739	Unit	523.472	Unit	10.245	1	380	21	5	Positive
TG	TG 48:3	FALSE	818.723	Unit	818.723	Unit	9.842	1	380	2	5	Positive
TG	TG 48:3 - 14:0	FALSE	818.723	Unit	573.487	Unit	9.9	1	380	21	5	Positive
TG	TG 48:3 - 14:1	FALSE	818.723	Unit	575.5	Unit	9.919	1	380	21	5	Positive
TG	TG 48:3 - 16:0	FALSE	818.723	Unit	545.456	Unit	9.919	1	380	21	5	Positive
TG	TG 48:3 - 16:1	FALSE	818.723	Unit	547.471	Unit	9.842	1	380	21	5	Positive
TG	TG 48:3 - 16:2	FALSE	818.723	Unit	549.5	Unit	9.842	1	380	21	5	Positive
TG	TG 48:3 - 18:1	FALSE	818.723	Unit	519.44	Unit	9.842	1	380	21	5	Positive
TG	TG 48:3 - 18:2	FALSE	818.723	Unit	521.456	Unit	9.823	1	380	21	5	Positive
TG	TG 48:3 - 18:3	FALSE	818.723	Unit	523.5	Unit	9.823	1	380	21	5	Positive
TG	TG 50:0	FALSE	852.8	Unit	852.8	Unit	11.247	1	380	2	5	Positive
TG	TG 50:0 - 16:0	FALSE	852.8	Unit	579.5	Unit	11.247	1	380	21	5	Positive
TG	TG 50:0 - 18:0	FALSE	852.8	Unit	551.5	Unit	11.247	1	380	21	5	Positive
TG	TG 50:1	FALSE	850.786	Unit	850.786	Unit	10.947	1	380	2	5	Positive
TG	TG 50:1 - 14:0	FALSE	850.786	Unit	605.55	Unit	10.947	1	380	21	5	Positive
TG	TG 50:1 - 16:0	FALSE	850.786	Unit	577.519	Unit	10.947	1	380	21	5	Positive
TG	TG 50:1 - 16:1	FALSE	850.786	Unit	579.486	Unit	10.947	1	380	21	5	Positive
TG	TG 50:1 - 18:0	FALSE	850.786	Unit	549.487	Unit	10.947	1	380	21	5	Positive
TG	TG 50:1 - 18:1	FALSE	850.786	Unit	551.503	Unit	10.947	1	380	21	5	Positive
TG	TG 50:2	FALSE	848.77	Unit	848.77	Unit	10.647	1	380	2	5	Positive
TG	TG 50:2 - 14:0	FALSE	848.77	Unit	603.534	Unit	10.628	1	380	21	5	Positive
TG	TG 50:2 - 16:0	FALSE	848.77	Unit	575.503	Unit	10.647	1	380	21	5	Positive
TG	TG 50:2 - 16:1	FALSE	848.8	Unit	577.5	Unit	10.647	1	380	21	5	Positive
TG	TG 50:2 - 18:0	FALSE	848.77	Unit	547.472	Unit	10.666	1	380	21	5	Positive
TG	TG 50:2 - 18:1	FALSE	848.77	Unit	549.487	Unit	10.628	1	380	21	5	Positive
TG	TG 50:2 - 18:2	FALSE	848.77	Unit	551.503	Unit	10.666	1	380	21	5	Positive
TG	TG 50:3	FALSE	846.755	Unit	846.755	Unit	10.281	1	380	2	5	Positive
TG	TG 50:3 - 14:0	FALSE	846.755	Unit	601.519	Unit	10.301	1	380	21	5	Positive
TG	TG 50:3 - 16:0	FALSE	846.755	Unit	573.487	Unit	10.301	1	380	21	5	Positive
TG	TG 50:3 - 16:1	FALSE	846.755	Unit	575.503	Unit	10.301	1	380	21	5	Positive
TG	TG 50:3 - 18:1	FALSE	846.755	Unit	547.471	Unit	10.281	1	380	21	5	Positive
TG	TG 50:3 - 18:2	FALSE	846.755	Unit	549.487	Unit	10.281	1	380	21	5	Positive
TG	TG 50:3 - 18:3	FALSE	846.755	Unit	551.5	Unit	10.281	1	380	21	5	Positive
TG	TG 50:4	FALSE	844.739	Unit	844.739	Unit	9.935	1	380	2	5	Positive
TG	TG 50:4 - 14:0	FALSE	844.739	Unit	599.503	Unit	9.935	1	380	21	5	Positive
TG	TG 50:4 - 14:1	FALSE	844.739	Unit	601.5	Unit	9.935	1	380	21	5	Positive
TG	TG 50:4 - 16:0	FALSE	844.739	Unit	571.471	Unit	10.049	1	380	21	5	Positive
TG	TG 50:4 - 16:1	FALSE	844.739	Unit	573.5	Unit	9.953	1	380	21	5	Positive
TG	TG 50:4 - 16:2	FALSE	844.739	Unit	575.5	Unit	9.953	1	380	21	5	Positive
TG	TG 50:4 - 18:0	FALSE	844.739	Unit	543.4	Unit	9.953	1	380	21	5	Positive
TG	TG 50:4 - 18:1	FALSE	844.739	Unit	545.456	Unit	9.953	1	380	21	5	Positive
TG	TG 50:4 - 18:2	FALSE	844.739	Unit	547.471	Unit	9.896	1	380	21	5	Positive
TG	TG 50:4 - 18:3	FALSE	844.739	Unit	549.487	Unit	9.935	1	380	21	5	Positive
TG	TG 52:0	FALSE	880.833	Unit	880.833	Unit	11.266	1	380	2	5	Positive
TG	TG 52:0 - 16:0	FALSE	880.833	Unit	607.565	Unit	11.266	1	380	21	5	Positive
TG	TG 52:0 - 18:0	FALSE	880.833	Unit	579.534	Unit	11.523	1	380	21	5	Positive
TG	TG 52:1	FALSE	878.817	Unit	878.817	Unit	11.267	1	380	2	5	Positive
TG	TG 52:1 - 16:0	FALSE	878.817	Unit	605.55	Unit	11.267	1	380	21	5	Positive
TG	TG 52:1 - 16:1	FALSE	878.817	Unit	607.5	Unit	11.267	1	380	21	5	Positive
TG	TG 52:1 - 18:0	FALSE	878.817	Unit	577.518	Unit	11.267	1	380	21	5	Positive
TG	TG 52:1 - 18:1	FALSE	878.817	Unit	579.534	Unit	11.267	1	380	21	5	Positive
TG	TG 52:1 - 20:1	FALSE	878.817	Unit	551.503	Unit	11.25	1	380	21	5	Positive
TG	TG 52:2	FALSE	876.802	Unit	876.802	Unit	10.963	1	380	2	5	Positive
TG	TG 52:2 - 14:0	FALSE	876.802	Unit	631.6	Unit	10.963	1	380	21	5	Positive
TG	TG 52:2 - 16:0	FALSE	876.802	Unit	603.534	Unit	10.981	1	380	21	5	Positive
TG	TG 52:2 - 16:1	FALSE	876.802	Unit	605.5	Unit	10.981	1	380	21	5	Positive
TG	TG 52:2 - 18:0	FALSE	876.802	Unit	575.503	Unit	11	1	380	21	5	Positive
TG	TG 52:2 - 18:1	FALSE	876.802	Unit	577.519	Unit	10.963	1	380	21	5	Positive
TG	TG 52:2 - 18:2	FALSE	876.802	Unit	579.534	Unit	11	1	380	21	5	Positive
TG	TG 52:2 - 20:1	FALSE	876.802	Unit	549.487	Unit	10.963	1	380	21	5	Positive
TG	TG 52:3	FALSE	874.786	Unit	874.786	Unit	10.682	1	380	2	5	Positive
TG	TG 52:3 - 16:0	FALSE	874.786	Unit	601.519	Unit	10.682	1	380	21	5	Positive
TG	TG 52:3 - 16:1	FALSE	874.786	Unit	603.534	Unit	10.644	1	380	21	5	Positive
TG	TG 52:3 - 18:0	FALSE	874.786	Unit	573.487	Unit	10.682	1	380	21	5	Positive
TG	TG 52:3 - 18:1	FALSE	874.786	Unit	575.503	Unit	10.682	1	380	21	5	Positive
TG	TG 52:3 - 18:2	FALSE	874.786	Unit	577.519	Unit	10.682	1	380	21	5	Positive
TG	TG 52:3 - 18:3	FALSE	874.786	Unit	579.5	Unit	10.682	1	380	21	5	Positive
TG	TG 52:3 - 20:2	FALSE	874.786	Unit	549.5	Unit	10.682	1	380	21	5	Positive
TG	TG 52:3 - 20:3	FALSE	874.786	Unit	551.5	Unit	10.682	1	380	21	5	Positive
TG	TG 52:4	FALSE	872.77	Unit	872.77	Unit	10.376	1	380	2	5	Positive
TG	TG 52:4 - 16:0	FALSE	872.77	Unit	599.503	Unit	10.356	1	380	21	5	Positive
TG	TG 52:4 - 16:1	FALSE	872.77	Unit	601.519	Unit	10.337	1	380	21	5	Positive
TG	TG 52:4 - 18:1	FALSE	872.77	Unit	573.487	Unit	10.356	1	380	21	5	Positive
TG	TG 52:4 - 18:2	FALSE	872.77	Unit	575.503	Unit	10.356	1	380	21	5	Positive
TG	TG 52:4 - 18:3	FALSE	872.77	Unit	577.518	Unit	10.396	1	380	21	5	Positive
TG	TG 52:4 - 20:3	FALSE	872.77	Unit	549.487	Unit	10.396	1	380	21	5	Positive
TG	TG 52:4 - 20:4	FALSE	872.77	Unit	551.5	Unit	10.396	1	380	21	5	Positive
TG	TG 52:5	FALSE	870.755	Unit	870.755	Unit	10.046	1	380	2	5	Positive
TG	TG 52:5 - 16:0	FALSE	870.755	Unit	597.487	Unit	10.065	1	380	21	5	Positive
TG	TG 52:5 - 16:1	FALSE	870.755	Unit	599.503	Unit	9.988	1	380	21	5	Positive
TG	TG 52:5 - 16:2	FALSE	870.8	Unit	601.5	Unit	10	1	380	21	5	Positive
TG	TG 52:5 - 18:1	FALSE	870.8	Unit	571.5	Unit	10	1	380	21	5	Positive
TG	TG 52:5 - 18:2	FALSE	870.755	Unit	573.487	Unit	9.988	1	380	21	5	Positive
TG	TG 52:5 - 18:3	FALSE	870.755	Unit	575.503	Unit	10.046	1	380	21	5	Positive
TG	TG 52:5 - 20:4	FALSE	870.755	Unit	549.487	Unit	10.2	1	380	21	5	Positive
TG	TG 52:6	FALSE	868.739	Unit	868.739	Unit	10.299	1	380	2	5	Positive
TG	TG 52:6 - 14:0	FALSE	868.739	Unit	623.503	Unit	9.875	1	380	21	5	Positive
TG	TG 52:6 - 14:1	FALSE	868.739	Unit	625.5	Unit	9.8	1	380	21	5	Positive
TG	TG 52:6 - 16:0	FALSE	868.739	Unit	595.5	Unit	9.8	1	380	21	5	Positive
TG	TG 52:6 - 16:1	FALSE	868.739	Unit	597.5	Unit	9.8	1	380	21	5	Positive
TG	TG 52:6 - 16:2	FALSE	868.739	Unit	599.5	Unit	9.8	1	380	21	5	Positive
TG	TG 52:6 - 16:3	FALSE	868.739	Unit	601.5	Unit	9.8	1	380	21	5	Positive
TG	TG 52:6 - 18:1	FALSE	868.739	Unit	569.456	Unit	9.74	1	380	21	5	Positive
TG	TG 52:6 - 18:2	FALSE	868.739	Unit	571.471	Unit	9.798	1	380	21	5	Positive
TG	TG 52:6 - 18:3	FALSE	868.739	Unit	573.487	Unit	9.684	1	380	21	5	Positive
TG	TG 52:6 - 18:4	FALSE	868.739	Unit	575.5	Unit	9.8	1	380	21	5	Positive
TG	TG 52:6 - 20:4	FALSE	868.739	Unit	547.471	Unit	9.817	1	380	21	5	Positive
TG	TG 52:6 - 20:5	FALSE	868.739	Unit	549.487	Unit	9.855	1	380	21	5	Positive
TG	TG 53:0	FALSE	890.8	Unit	890.8	Unit	11.768	1	380	2	5	Positive
TG	TG 53:0 - 16:0	FALSE	890.8	Unit	617.5	Unit	11.768	1	380	21	5	Positive
TG	TG 53:1	FALSE	892.8	Unit	892.8	Unit	11.468	1	380	2	5	Positive
TG	TG 53:1 - 16:0	FALSE	892.8	Unit	619.6	Unit	11.468	1	380	21	5	Positive
TG	TG 53:1 - 16:1	FALSE	892.8	Unit	621.6	Unit	11.468	1	380	21	5	Positive
TG	TG 53:1 - 17:0	FALSE	892.8	Unit	605.6	Unit	11.468	1	380	21	5	Positive
TG	TG 53:1 - 18:0	FALSE	892.8	Unit	591.5	Unit	11.168	1	380	21	5	Positive
TG	TG 53:1 - 18:1	FALSE	892.8	Unit	593.6	Unit	11.15	1	380	21	5	Positive
TG	TG 53:2	FALSE	892.8	Unit	892.8	Unit	11.168	1	380	2	5	Positive
TG	TG 53:2 - 16:0	FALSE	892.8	Unit	577.5	Unit	11.168	1	380	21	5	Positive
TG	TG 53:2 - 17:0	FALSE	892.8	Unit	579.5	Unit	11.168	1	380	21	5	Positive
TG	TG 53:2 - 18:1	FALSE	890.8	Unit	603.5	Unit	11.168	1	380	21	5	Positive
TG	TG 53:3	FALSE	888.802	Unit	888.801	Unit	10.868	1	380	2	5	Positive
TG	TG 53:3 - 16:0	FALSE	888.802	Unit	591.5	Unit	10.85	1	380	21	5	Positive
TG	TG 53:3 - 17:0	FALSE	888.802	Unit	601.518	Unit	10.868	1	380	21	5	Positive
TG	TG 53:3 - 17:1	FALSE	888.802	Unit	603.534	Unit	10.85	1	380	21	5	Positive
TG	TG 53:3 - 18:1	FALSE	888.802	Unit	589.518	Unit	10.85	1	380	21	5	Positive
TG	TG 53:3 - 18:2	FALSE	888.802	Unit	591.534	Unit	10.868	1	380	21	5	Positive
TG	TG 53:4	FALSE	886.786	Unit	886.786	Unit	10.567	1	380	2	5	Positive
TG	TG 53:4 - 17:0	FALSE	886.786	Unit	599.503	Unit	10.567	1	380	21	5	Positive
TG	TG 53:4 - 17:1	FALSE	886.786	Unit	601.519	Unit	10.529	1	380	21	5	Positive
TG	TG 53:4 - 18:1	FALSE	886.786	Unit	587.503	Unit	10.529	1	380	21	5	Positive
TG	TG 53:4 - 18:2	FALSE	886.786	Unit	589.519	Unit	10.548	1	380	21	5	Positive
TG	TG 54:0	FALSE	908.8	Unit	908.8	Unit	11.91	1	380	2	5	Positive
TG	TG 54:0 - 16:0	FALSE	908.8	Unit	635.5	Unit	11.91	1	380	21	5	Positive
TG	TG 54:1	FALSE	906.8	Unit	906.8	Unit	11.61	1	380	2	5	Positive
TG	TG 54:1 - 16:0	FALSE	906.8	Unit	633.5	Unit	11.61	1	380	21	5	Positive
TG	TG 54:1 - 18:0	FALSE	906.8	Unit	605.6	Unit	11.61	1	380	21	5	Positive
TG	TG 54:1 - 18:1	FALSE	906.8	Unit	607.6	Unit	11.629	1	380	21	5	Positive
TG	TG 54:1 - 20:0	FALSE	906.8	Unit	577.5	Unit	11.61	1	380	21	5	Positive
TG	TG 54:1 - 20:1	FALSE	906.8	Unit	579.5	Unit	11.629	1	380	21	5	Positive
TG	TG 54:2	FALSE	904.8	Unit	904.8	Unit	11.31	1	380	2	5	Positive
TG	TG 54:2 - 16:0	FALSE	904.8	Unit	631.5	Unit	11.31	1	380	21	5	Positive
TG	TG 54:2 - 18:0	FALSE	904.8	Unit	603.5	Unit	11.31	1	380	21	5	Positive
TG	TG 54:2 - 18:1	FALSE	904.8	Unit	605.6	Unit	11.329	1	380	21	5	Positive
TG	TG 54:2 - 18:2	FALSE	904.8	Unit	607.5	Unit	11.31	1	380	21	5	Positive
TG	TG 54:2 - 20:0	FALSE	904.8	Unit	575.5	Unit	11.329	1	380	21	5	Positive
TG	TG 54:2 - 20:1	FALSE	904.8	Unit	577.5	Unit	11.329	1	380	21	5	Positive
TG	TG 54:2 - 20:2	FALSE	904.8	Unit	579.5	Unit	11.329	1	380	21	5	Positive
TG	TG 54:3	FALSE	902.817	Unit	902.817	Unit	11.01	1	380	2	5	Positive
TG	TG 54:3 - 16:0	FALSE	902.817	Unit	629.55	Unit	11.01	1	380	21	5	Positive
TG	TG 54:3 - 16:1	FALSE	902.817	Unit	631.5	Unit	11.01	1	380	21	5	Positive
TG	TG 54:3 - 18:0	FALSE	902.817	Unit	601.519	Unit	11.029	1	380	21	5	Positive
TG	TG 54:3 - 18:1	FALSE	902.817	Unit	603.534	Unit	11.01	1	380	21	5	Positive
TG	TG 54:3 - 18:2	FALSE	902.817	Unit	605.55	Unit	11.029	1	380	21	5	Positive
TG	TG 54:3 - 20:1	FALSE	902.817	Unit	575.5	Unit	11.029	1	380	21	5	Positive
TG	TG 54:3 - 20:2	FALSE	902.817	Unit	577.519	Unit	11.029	1	380	21	5	Positive
TG	TG 54:3 - 20:3	FALSE	902.817	Unit	579.5	Unit	11.029	1	380	21	5	Positive
TG	TG 54:4	FALSE	900.802	Unit	900.801	Unit	10.716	1	380	2	5	Positive
TG	TG 54:4 - 16:0	FALSE	900.802	Unit	627.534	Unit	10.754	1	380	21	5	Positive
TG	TG 54:4 - 16:1	FALSE	900.802	Unit	628.5	Unit	10.754	1	380	21	5	Positive
TG	TG 54:4 - 18:0	FALSE	900.802	Unit	599.503	Unit	10.754	1	380	21	5	Positive
TG	TG 54:4 - 18:1	FALSE	900.802	Unit	601.518	Unit	10.716	1	380	21	5	Positive
TG	TG 54:4 - 18:2	FALSE	900.802	Unit	603.534	Unit	10.735	1	380	21	5	Positive
TG	TG 54:4 - 18:3	FALSE	900.802	Unit	605.5	Unit	10.716	1	380	21	5	Positive
TG	TG 54:4 - 20:1	FALSE	900.802	Unit	573.5	Unit	10.716	1	380	21	5	Positive
TG	TG 54:4 - 20:2	FALSE	900.802	Unit	575.503	Unit	10.716	1	380	21	5	Positive
TG	TG 54:4 - 20:3	FALSE	900.802	Unit	577.5	Unit	10.716	1	380	21	5	Positive
TG	TG 54:4 - 20:4	FALSE	900.802	Unit	579.5	Unit	10.716	1	380	21	5	Positive
TG	TG 54:5	FALSE	898.786	Unit	898.786	Unit	10.412	1	380	2	5	Positive
TG	TG 54:5 - 16:0	FALSE	898.786	Unit	625.519	Unit	10.603	1	380	21	5	Positive
TG	TG 54:5 - 16:1	FALSE	898.786	Unit	627.5	Unit	10.431	1	380	21	5	Positive
TG	TG 54:5 - 18:0	FALSE	898.786	Unit	597.5	Unit	10.431	1	380	21	5	Positive
TG	TG 54:5 - 18:1	FALSE	898.786	Unit	599.503	Unit	10.431	1	380	21	5	Positive
TG	TG 54:5 - 18:2	FALSE	898.786	Unit	601.519	Unit	10.412	1	380	21	5	Positive
TG	TG 54:5 - 18:3	FALSE	898.786	Unit	603.534	Unit	10.469	1	380	21	5	Positive
TG	TG 54:5 - 20:2	FALSE	898.786	Unit	573.5	Unit	10.469	1	380	21	5	Positive
TG	TG 54:5 - 20:3	FALSE	898.786	Unit	575.503	Unit	10.469	1	380	21	5	Positive
TG	TG 54:5 - 20:4	FALSE	898.786	Unit	577.519	Unit	10.603	1	380	21	5	Positive
TG	TG 54:5 - 22:5	FALSE	898.786	Unit	551.5	Unit	10.469	1	380	21	5	Positive
TG	TG 54:6	FALSE	896.77	Unit	896.77	Unit	10.062	1	380	2	5	Positive
TG	TG 54:6 - 16:0	FALSE	896.77	Unit	623.503	Unit	10.294	1	380	21	5	Positive
TG	TG 54:6 - 16:1	FALSE	896.77	Unit	625.5	Unit	10.101	1	380	21	5	Positive
TG	TG 54:6 - 18:1	FALSE	896.77	Unit	597.5	Unit	10.101	1	380	21	5	Positive
TG	TG 54:6 - 18:1	FALSE	896.77	Unit	597.487	Unit	10.101	1	380	21	5	Positive
TG	TG 54:6 - 18:2	FALSE	896.77	Unit	599.503	Unit	10.062	1	380	21	5	Positive
TG	TG 54:6 - 18:3	FALSE	896.77	Unit	601.519	Unit	10.101	1	380	21	5	Positive
TG	TG 54:6 - 20:3	FALSE	896.77	Unit	573.5	Unit	10.101	1	380	21	5	Positive
TG	TG 54:6 - 20:4	FALSE	896.77	Unit	575.503	Unit	10.256	1	380	21	5	Positive
TG	TG 54:6 - 20:5	FALSE	896.77	Unit	577.519	Unit	10.315	1	380	21	5	Positive
TG	TG 54:6 - 22:5	FALSE	896.77	Unit	549.5	Unit	10.315	1	380	21	5	Positive
TG	TG 54:6 - 22:6	FALSE	896.77	Unit	551.5	Unit	10.315	1	380	21	5	Positive
TG	TG 54:7	FALSE	894.755	Unit	894.755	Unit	9.872	1	380	2	5	Positive
TG	TG 54:7 - 16:1	FALSE	894.755	Unit	623.5	Unit	9.872	1	380	21	5	Positive
TG	TG 54:7 - 18:1	FALSE	894.755	Unit	595.471	Unit	10.063	1	380	21	5	Positive
TG	TG 54:7 - 18:2	FALSE	894.755	Unit	597.487	Unit	9.701	1	380	21	5	Positive
TG	TG 54:7 - 18:3	FALSE	894.755	Unit	599.503	Unit	9.701	1	380	21	5	Positive
TG	TG 54:7 - 20:4	FALSE	894.755	Unit	573.5	Unit	9.701	1	380	21	5	Positive
TG	TG 54:7 - 20:5	FALSE	894.755	Unit	575.5	Unit	9.701	1	380	21	5	Positive
TG	TG 54:7 - 22:6	FALSE	894.755	Unit	549.487	Unit	10.026	1	380	21	5	Positive
TG	TG 54:8	FALSE	892.8	Unit	892.8	Unit	9.401	1	380	2	5	Positive
TG	TG 54:8 - 22:6	FALSE	892.8	Unit	547.5	Unit	9.401	1	380	21	5	Positive
TG	TG 56:1	FALSE	934.9	Unit	934.9	Unit	12.062	1	380	2	5	Positive
TG	TG 56:1 - 16:0	FALSE	934.9	Unit	661.6	Unit	12.062	1	380	21	5	Positive
TG	TG 56:1 - 16:1	FALSE	934.9	Unit	663.6	Unit	12.062	1	380	21	5	Positive
TG	TG 56:1 - 18:0	FALSE	934.9	Unit	633.6	Unit	12.062	1	380	21	5	Positive
TG	TG 56:1 - 18:1	FALSE	934.9	Unit	635.6	Unit	12.062	1	380	21	5	Positive
TG	TG 56:1 - 20:0	FALSE	934.9	Unit	605.6	Unit	12.062	1	380	21	5	Positive
TG	TG 56:1 - 20:1	FALSE	934.9	Unit	607.6	Unit	12.062	1	380	21	5	Positive
TG	TG 56:1 - 22:0	FALSE	934.9	Unit	577.5	Unit	12.062	1	380	21	5	Positive
TG	TG 56:1 - 22:1	FALSE	934.9	Unit	579.5	Unit	12.062	1	380	21	5	Positive
TG	TG 56:1 - 24:0	FALSE	934.9	Unit	549.5	Unit	12.062	1	380	21	5	Positive
TG	TG 56:1 - 24:1	FALSE	934.9	Unit	551.5	Unit	12.062	1	380	21	5	Positive
TG	TG 56:2	FALSE	932.9	Unit	932.9	Unit	11.762	1	380	2	5	Positive
TG	TG 56:2 - 16:0	FALSE	932.9	Unit	659.6	Unit	11.762	1	380	21	5	Positive
TG	TG 56:2 - 16:1	FALSE	932.9	Unit	661.6	Unit	11.762	1	380	21	5	Positive
TG	TG 56:2 - 18:0	FALSE	932.9	Unit	631.6	Unit	11.762	1	380	21	5	Positive
TG	TG 56:2 - 18:1	FALSE	932.9	Unit	633.6	Unit	11.762	1	380	21	5	Positive
TG	TG 56:2 - 18:2	FALSE	932.9	Unit	635.6	Unit	11.762	1	380	21	5	Positive
TG	TG 56:2 - 20:0	FALSE	932.9	Unit	603.5	Unit	11.762	1	380	21	5	Positive
TG	TG 56:2 - 20:1	FALSE	932.9	Unit	605.6	Unit	11.762	1	380	21	5	Positive
TG	TG 56:2 - 20:2	FALSE	932.9	Unit	607.6	Unit	11.762	1	380	21	5	Positive
TG	TG 56:2 - 22:0	FALSE	932.9	Unit	575.5	Unit	11.762	1	380	21	5	Positive
TG	TG 56:2 - 22:1	FALSE	932.9	Unit	577.5	Unit	11.762	1	380	21	5	Positive
TG	TG 56:3	FALSE	930.8	Unit	930.8	Unit	11.462	1	380	2	5	Positive
TG	TG 56:3 - 16:0	FALSE	930.8	Unit	657.5	Unit	11.462	1	380	21	5	Positive
TG	TG 56:3 - 18:0	FALSE	930.8	Unit	629.6	Unit	11.462	1	380	21	5	Positive
TG	TG 56:3 - 18:1	FALSE	930.8	Unit	631.6	Unit	11.462	1	380	21	5	Positive
TG	TG 56:3 - 18:2	FALSE	930.8	Unit	633.6	Unit	11.462	1	380	21	5	Positive
TG	TG 56:3 - 20:0	FALSE	930.8	Unit	601.5	Unit	11.462	1	380	21	5	Positive
TG	TG 56:3 - 20:1	FALSE	930.8	Unit	603.5	Unit	11.462	1	380	21	5	Positive
TG	TG 56:3 - 20:2	FALSE	930.8	Unit	605.6	Unit	11.462	1	380	21	5	Positive
TG	TG 56:3 - 20:3	FALSE	930.8	Unit	607.6	Unit	11.462	1	380	21	5	Positive
TG	TG 56:4	FALSE	928.8	Unit	928.8	Unit	11.162	1	380	2	5	Positive
TG	TG 56:4 - 16:0	FALSE	928.8	Unit	655.6	Unit	11.162	1	380	21	5	Positive
TG	TG 56:4 - 18:0	FALSE	928.8	Unit	627.5	Unit	11.162	1	380	21	5	Positive
TG	TG 56:4 - 18:1	FALSE	928.8	Unit	629.6	Unit	11.162	1	380	21	5	Positive
TG	TG 56:4 - 18:2	FALSE	928.8	Unit	631.6	Unit	11.162	1	380	21	5	Positive
TG	TG 56:4 - 20:1	FALSE	928.8	Unit	601.5	Unit	11.162	1	380	21	5	Positive
TG	TG 56:4 - 20:2	FALSE	928.8	Unit	603.5	Unit	11.162	1	380	21	5	Positive
TG	TG 56:4 - 20:3	FALSE	928.8	Unit	605.6	Unit	11.162	1	380	21	5	Positive
TG	TG 56:4 - 20:4	FALSE	928.8	Unit	607.6	Unit	11.162	1	380	21	5	Positive
TG	TG 56:4 - 22:3	FALSE	928.8	Unit	577.5	Unit	11.162	1	380	21	5	Positive
TG	TG 56:4 - 22:4	FALSE	928.8	Unit	579.5	Unit	11.162	1	380	21	5	Positive
TG	TG 56:5	FALSE	926.817	Unit	926.817	Unit	10.862	1	380	2	5	Positive
TG	TG 56:5 - 16:0	FALSE	926.817	Unit	653.55	Unit	10.862	1	380	21	5	Positive
TG	TG 56:5 - 18:0	FALSE	926.817	Unit	625.5	Unit	10.788	1	380	21	5	Positive
TG	TG 56:5 - 18:1	FALSE	926.817	Unit	627.534	Unit	10.788	1	380	21	5	Positive
TG	TG 56:5 - 18:2	FALSE	926.817	Unit	629.55	Unit	10.768	1	380	21	5	Positive
TG	TG 56:5 - 18:3	FALSE	926.817	Unit	631.6	Unit	10.768	1	380	21	5	Positive
TG	TG 56:5 - 20:1	FALSE	926.817	Unit	599.5	Unit	10.768	1	380	21	5	Positive
TG	TG 56:5 - 20:2	FALSE	926.817	Unit	601.519	Unit	10.768	1	380	21	5	Positive
TG	TG 56:5 - 20:3	FALSE	926.817	Unit	603.534	Unit	10.825	1	380	21	5	Positive
TG	TG 56:5 - 20:4	FALSE	926.817	Unit	605.6	Unit	10.825	1	380	21	5	Positive
TG	TG 56:5 - 22:4	FALSE	926.817	Unit	577.519	Unit	10.862	1	380	21	5	Positive
TG	TG 56:5 - 22:5	FALSE	926.817	Unit	579.5	Unit	10.862	1	380	21	5	Positive
TG	TG 56:6	FALSE	924.802	Unit	924.802	Unit	10.561	1	380	2	5	Positive
TG	TG 56:6 - 16:0	FALSE	924.802	Unit	651.534	Unit	10.58	1	380	21	5	Positive
TG	TG 56:6 - 16:1	FALSE	924.802	Unit	653.6	Unit	10.58	1	380	21	5	Positive
TG	TG 56:6 - 18:0	FALSE	924.802	Unit	623.5	Unit	10.637	1	380	21	5	Positive
TG	TG 56:6 - 18:1	FALSE	924.802	Unit	625.519	Unit	10.637	1	380	21	5	Positive
TG	TG 56:6 - 18:2	FALSE	924.802	Unit	627.534	Unit	10.485	1	380	21	5	Positive
TG	TG 56:6 - 20:3	FALSE	924.802	Unit	601.519	Unit	10.504	1	380	21	5	Positive
TG	TG 56:6 - 20:4	FALSE	924.802	Unit	603.534	Unit	10.637	1	380	21	5	Positive
TG	TG 56:6 - 22:4	FALSE	924.802	Unit	575.503	Unit	10.58	1	380	21	5	Positive
TG	TG 56:6 - 22:5	FALSE	924.802	Unit	577.519	Unit	10.599	1	380	21	5	Positive
TG	TG 56:6 - 22:6	FALSE	924.802	Unit	579.5	Unit	10.599	1	380	21	5	Positive
TG	TG 56:7	FALSE	922.786	Unit	922.786	Unit	10.752	1	380	2	5	Positive
TG	TG 56:7 - 16:0	FALSE	922.786	Unit	649.519	Unit	10.467	1	380	21	5	Positive
TG	TG 56:7 - 16:1	FALSE	922.786	Unit	651.5	Unit	10.312	1	380	21	5	Positive
TG	TG 56:7 - 18:1	FALSE	922.786	Unit	623.503	Unit	10.312	1	380	21	5	Positive
TG	TG 56:7 - 18:2	FALSE	922.786	Unit	625.519	Unit	10.312	1	380	21	5	Positive
TG	TG 56:7 - 20:4	FALSE	922.786	Unit	601.519	Unit	10.331	1	380	21	5	Positive
TG	TG 56:7 - 20:5	FALSE	922.786	Unit	603.5	Unit	10.331	1	380	21	5	Positive
TG	TG 56:7 - 22:5	FALSE	922.786	Unit	575.503	Unit	10.272	1	380	21	5	Positive
TG	TG 56:7 - 22:6	FALSE	922.786	Unit	577.519	Unit	10.448	1	380	21	5	Positive
TG	TG 56:8	FALSE	920.77	Unit	920.77	Unit	10.042	1	380	2	5	Positive
TG	TG 56:8 - 16:0	FALSE	920.8	Unit	647.5	Unit	10.042	1	380	21	5	Positive
TG	TG 56:8 - 16:1	FALSE	920.8	Unit	649.5	Unit	10.042	1	380	21	5	Positive
TG	TG 56:8 - 18:1	FALSE	920.77	Unit	621.487	Unit	10.042	1	380	21	5	Positive
TG	TG 56:8 - 18:2	FALSE	920.77	Unit	623.503	Unit	9.966	1	380	21	5	Positive
TG	TG 56:8 - 20:4	FALSE	920.77	Unit	599.503	Unit	9.984	1	380	21	5	Positive
TG	TG 56:8 - 20:5	FALSE	920.8	Unit	601.5	Unit	9.984	1	380	21	5	Positive
TG	TG 56:8 - 22:5	FALSE	920.77	Unit	573.487	Unit	10.023	1	380	21	5	Positive
TG	TG 56:8 - 22:6	FALSE	920.77	Unit	575.503	Unit	10.119	1	380	21	5	Positive
TG	TG 56:9	FALSE	918.8	Unit	918.8	Unit	9.742	1	380	2	5	Positive
TG	TG 56:9 - 16:1	FALSE	918.8	Unit	647.5	Unit	9.666	1	380	21	5	Positive
TG	TG 56:9 - 18:2	FALSE	918.8	Unit	621.5	Unit	9.684	1	380	21	5	Positive
TG	TG 56:9 - 20:5	FALSE	918.8	Unit	599.5	Unit	9.684	1	380	21	5	Positive
TG	TG 56:9 - 22:6	FALSE	918.8	Unit	573.5	Unit	9.723	1	380	21	5	Positive
TG	TG 58:10	FALSE	944.8	Unit	944.8	Unit	9.728	1	380	2	5	Positive
TG	TG 58:10 - 18:2	FALSE	944.8	Unit	647.5	Unit	9.728	1	380	21	5	Positive
TG	TG 58:10 - 22:6	FALSE	944.8	Unit	599.5	Unit	9.728	1	380	21	5	Positive
TG	TG 58:8	FALSE	948.802	Unit	948.801	Unit	10.842	1	380	2	5	Positive
TG	TG 58:8 - 18:1	FALSE	948.802	Unit	649.518	Unit	10.328	1	380	21	5	Positive
TG	TG 58:8 - 18:2	FALSE	948.802	Unit	651.534	Unit	10.289	1	380	21	5	Positive
TG	TG 58:8 - 22:5	FALSE	948.802	Unit	601.518	Unit	10.464	1	380	21	5	Positive
TG	TG 58:8 - 22:6	FALSE	948.802	Unit	603.534	Unit	10.502	1	380	21	5	Positive
TG	TG 58:9	FALSE	946.8	Unit	946.8	Unit	10.028	1	380	2	5	Positive
TG	TG 58:9 - 18:1	FALSE	946.8	Unit	647.5	Unit	10.028	1	380	21	5	Positive
TG	TG 58:9 - 18:2	FALSE	946.8	Unit	649.5	Unit	10.028	1	380	21	5	Positive
TG	TG 58:9 - 22:5	FALSE	946.8	Unit	599.5	Unit	10.028	1	380	21	5	Positive
TG	TG 58:9 - 22:6	FALSE	946.8	Unit	601.5	Unit	10.028	1	380	21	5	Positive
TG	TG 60:10	FALSE	972.8	Unit	972.8	Unit	10.028	2	380	2	5	Positive
TG	TG 60:10 - 22:6	FALSE	972.8	Unit	627.5	Unit	10.028	2	380	21	5	Positive
TG	TG 60:11	FALSE	970.8	Unit	970.8	Unit	9.628	2	380	2	5	Positive
TG	TG 60:11 - 22:6	FALSE	970.8	Unit	625.5	Unit	9.628	2	380	21	5	Positive
TG	TG 60:12	FALSE	968.8	Unit	968.8	Unit	9.3	2	380	2	5	Positive
TG	TG 60:12 - 22:6	FALSE	968.8	Unit	623.5	Unit	9.3	2	380	21	5	Positive
TG	TG 48:0	FALSE	824.77	Unit	824.77	Unit	10.913	1	380	2	5	Positive
TG	TG 48:0 - 14:0	FALSE	824.77	Unit	579.534	Unit	10.931	1	380	21	5	Positive
TG	TG 48:0 - 16:0	FALSE	824.77	Unit	551.503	Unit	10.913	1	380	21	5	Positive
TG	TG 48:1	FALSE	822.755	Unit	822.755	Unit	10.593	1	380	2	5	Positive
TG	TG 48:1 - 14:0	FALSE	822.755	Unit	577.518	Unit	10.574	1	380	21	5	Positive
TG	TG 48:1 - 16:0	FALSE	822.755	Unit	549.487	Unit	10.593	1	380	21	5	Positive
TG	TG 48:1 - 16:1	FALSE	822.755	Unit	551.503	Unit	10.593	1	380	21	5	Positive
TG	TG 48:2	FALSE	820.739	Unit	820.739	Unit	10.226	1	380	2	5	Positive
TG	TG 48:2 - 14:0	FALSE	820.739	Unit	575.503	Unit	10.245	1	380	21	5	Positive
TG	TG 48:2 - 16:0	FALSE	820.739	Unit	547.472	Unit	10.245	1	380	21	5	Positive
TG	TG 48:2 - 16:1	FALSE	820.739	Unit	549.487	Unit	10.186	1	380	21	5	Positive
TG	TG 48:2 - 18:1	FALSE	820.739	Unit	521.456	Unit	10.205	1	380	21	5	Positive
TG	TG 48:2 - 18:2	FALSE	820.739	Unit	523.472	Unit	10.245	1	380	21	5	Positive
TG	TG 48:3	FALSE	818.723	Unit	818.723	Unit	9.842	1	380	2	5	Positive
TG	TG 48:3 - 14:0	FALSE	818.723	Unit	573.487	Unit	9.9	1	380	21	5	Positive
TG	TG 48:3 - 16:0	FALSE	818.723	Unit	545.456	Unit	9.919	1	380	21	5	Positive
TG	TG 48:3 - 16:1	FALSE	818.723	Unit	547.471	Unit	9.842	1	380	21	5	Positive
TG	TG 48:3 - 18:1	FALSE	818.723	Unit	519.44	Unit	9.842	1	380	21	5	Positive
TG	TG 48:3 - 18:2	FALSE	818.723	Unit	521.456	Unit	9.823	1	380	21	5	Positive
TG	TG 50:1	FALSE	850.786	Unit	850.786	Unit	10.947	1	380	2	5	Positive
TG	TG 50:1 - 14:0	FALSE	850.786	Unit	605.55	Unit	10.947	1	380	21	5	Positive
TG	TG 50:1 - 16:0	FALSE	850.786	Unit	577.519	Unit	10.947	1	380	21	5	Positive
TG	TG 50:1 - 18:0	FALSE	850.786	Unit	549.487	Unit	10.947	1	380	21	5	Positive
TG	TG 50:1 - 18:1	FALSE	850.786	Unit	551.503	Unit	10.947	1	380	21	5	Positive
TG	TG 50:2	FALSE	848.77	Unit	848.77	Unit	10.647	1	380	2	5	Positive
TG	TG 50:2 - 14:0	FALSE	848.77	Unit	603.534	Unit	10.628	1	380	21	5	Positive
TG	TG 50:2 - 16:0	FALSE	848.77	Unit	575.503	Unit	10.647	1	380	21	5	Positive
TG	TG 50:2 - 18:0	FALSE	848.77	Unit	547.472	Unit	10.666	1	380	21	5	Positive
TG	TG 50:2 - 18:1	FALSE	848.77	Unit	549.487	Unit	10.628	1	380	21	5	Positive
TG	TG 50:2 - 18:2	FALSE	848.77	Unit	551.503	Unit	10.666	1	380	21	5	Positive
TG	TG 50:3	FALSE	846.755	Unit	846.755	Unit	10.281	1	380	2	5	Positive
TG	TG 50:3 - 14:0	FALSE	846.755	Unit	601.519	Unit	10.301	1	380	21	5	Positive
TG	TG 50:3 - 16:0	FALSE	846.755	Unit	573.487	Unit	10.301	1	380	21	5	Positive
TG	TG 50:3 - 16:1	FALSE	846.755	Unit	575.503	Unit	10.301	1	380	21	5	Positive
TG	TG 50:3 - 18:1	FALSE	846.755	Unit	547.471	Unit	10.281	1	380	21	5	Positive
TG	TG 50:3 - 18:2	FALSE	846.755	Unit	549.487	Unit	10.281	1	380	21	5	Positive
TG	TG 50:4	FALSE	844.739	Unit	844.739	Unit	9.935	1	380	2	5	Positive
TG	TG 50:4 - 12:0	FALSE	844.739	Unit	627.534	Unit	9.935	1	380	21	5	Positive
TG	TG 50:4 - 14:0	FALSE	844.739	Unit	599.503	Unit	9.935	1	380	21	5	Positive
TG	TG 50:4 - 16:0	FALSE	844.739	Unit	571.471	Unit	10.049	1	380	21	5	Positive
TG	TG 50:4 - 18:1	FALSE	844.739	Unit	545.456	Unit	9.953	1	380	21	5	Positive
TG	TG 50:4 - 18:2	FALSE	844.739	Unit	547.471	Unit	9.896	1	380	21	5	Positive
TG	TG 50:4 - 18:3	FALSE	844.739	Unit	549.487	Unit	9.935	1	380	21	5	Positive
TG	TG 52:0	FALSE	880.833	Unit	880.833	Unit	11.266	1	380	2	5	Positive
TG	TG 52:0 - 16:0	FALSE	880.833	Unit	607.565	Unit	11.266	1	380	21	5	Positive
TG	TG 52:0 - 18:0	FALSE	880.833	Unit	579.534	Unit	11.523	1	380	21	5	Positive
TG	TG 52:1	FALSE	878.817	Unit	878.817	Unit	11.267	1	380	2	5	Positive
TG	TG 52:1 - 16:0	FALSE	878.817	Unit	605.55	Unit	11.267	1	380	21	5	Positive
TG	TG 52:1 - 18:0	FALSE	878.817	Unit	577.518	Unit	11.267	1	380	21	5	Positive
TG	TG 52:1 - 18:1	FALSE	878.817	Unit	579.534	Unit	11.267	1	380	21	5	Positive
TG	TG 52:1 - 20:1	FALSE	878.817	Unit	551.503	Unit	11.25	1	380	21	5	Positive
TG	TG 52:2	FALSE	876.802	Unit	876.802	Unit	10.963	1	380	2	5	Positive
TG	TG 52:2 - 16:0	FALSE	876.802	Unit	603.534	Unit	10.981	1	380	21	5	Positive
TG	TG 52:2 - 18:0	FALSE	876.802	Unit	575.503	Unit	11	1	380	21	5	Positive
TG	TG 52:2 - 18:1	FALSE	876.802	Unit	577.519	Unit	10.963	1	380	21	5	Positive
TG	TG 52:2 - 18:2	FALSE	876.802	Unit	579.534	Unit	11	1	380	21	5	Positive
TG	TG 52:2 - 20:1	FALSE	876.802	Unit	549.487	Unit	10.963	1	380	21	5	Positive
TG	TG 52:3	FALSE	874.786	Unit	874.786	Unit	10.682	1	380	2	5	Positive
TG	TG 52:3 - 16:0	FALSE	874.786	Unit	601.519	Unit	10.682	1	380	21	5	Positive
TG	TG 52:3 - 16:1	FALSE	874.786	Unit	603.534	Unit	10.644	1	380	21	5	Positive
TG	TG 52:3 - 18:0	FALSE	874.786	Unit	573.487	Unit	10.682	1	380	21	5	Positive
TG	TG 52:3 - 18:1	FALSE	874.786	Unit	575.503	Unit	10.682	1	380	21	5	Positive
TG	TG 52:3 - 18:2	FALSE	874.786	Unit	577.519	Unit	10.682	1	380	21	5	Positive
TG	TG 52:4	FALSE	872.77	Unit	872.77	Unit	10.376	1	380	2	5	Positive
TG	TG 52:4 - 14:0	FALSE	872.77	Unit	627.534	Unit	10.376	1	380	21	5	Positive
TG	TG 52:4 - 16:0	FALSE	872.77	Unit	599.503	Unit	10.356	1	380	21	5	Positive
TG	TG 52:4 - 16:1	FALSE	872.77	Unit	601.519	Unit	10.337	1	380	21	5	Positive
TG	TG 52:4 - 18:1	FALSE	872.77	Unit	573.487	Unit	10.356	1	380	21	5	Positive
TG	TG 52:4 - 18:2	FALSE	872.77	Unit	575.503	Unit	10.356	1	380	21	5	Positive
TG	TG 52:4 - 18:3	FALSE	872.77	Unit	577.518	Unit	10.396	1	380	21	5	Positive
TG	TG 52:4 - 20:3	FALSE	872.77	Unit	549.487	Unit	10.396	1	380	21	5	Positive
TG	TG 52:5	FALSE	870.755	Unit	870.755	Unit	10.046	1	380	2	5	Positive
TG	TG 52:5 - 16:0	FALSE	870.755	Unit	597.487	Unit	10.065	1	380	21	5	Positive
TG	TG 52:5 - 16:1	FALSE	870.755	Unit	599.503	Unit	9.988	1	380	21	5	Positive
TG	TG 52:5 - 18:2	FALSE	870.755	Unit	573.487	Unit	9.988	1	380	21	5	Positive
TG	TG 52:5 - 18:3	FALSE	870.755	Unit	575.503	Unit	10.046	1	380	21	5	Positive
TG	TG 52:5 - 20:4	FALSE	870.755	Unit	549.487	Unit	10.2	1	380	21	5	Positive
TG	TG 52:6	FALSE	868.739	Unit	868.739	Unit	10.299	1	380	2	5	Positive
TG	TG 52:6 - 14:0	FALSE	868.739	Unit	623.503	Unit	9.875	1	380	21	5	Positive
TG	TG 52:6 - 18:1	FALSE	868.739	Unit	569.456	Unit	9.74	1	380	21	5	Positive
TG	TG 52:6 - 18:2	FALSE	868.739	Unit	571.471	Unit	9.798	1	380	21	5	Positive
TG	TG 52:6 - 18:3	FALSE	868.739	Unit	573.487	Unit	9.684	1	380	21	5	Positive
TG	TG 52:6 - 20:4	FALSE	868.739	Unit	547.471	Unit	9.817	1	380	21	5	Positive
TG	TG 52:6 - 20:5	FALSE	868.739	Unit	549.487	Unit	9.855	1	380	21	5	Positive
TG	TG 53:3	FALSE	888.802	Unit	888.801	Unit	10.868	1	380	2	5	Positive
TG	TG 53:3 - 17:0	FALSE	888.802	Unit	601.518	Unit	10.868	1	380	21	5	Positive
TG	TG 53:3 - 17:1	FALSE	888.802	Unit	603.534	Unit	10.85	1	380	21	5	Positive
TG	TG 53:3 - 18:1	FALSE	888.802	Unit	589.518	Unit	10.85	1	380	21	5	Positive
TG	TG 53:3 - 18:2	FALSE	888.802	Unit	591.534	Unit	10.868	1	380	21	5	Positive
TG	TG 53:4	FALSE	886.786	Unit	886.786	Unit	10.567	1	380	2	5	Positive
TG	TG 53:4 - 17:0	FALSE	886.786	Unit	599.503	Unit	10.567	1	380	21	5	Positive
TG	TG 53:4 - 17:1	FALSE	886.786	Unit	601.519	Unit	10.529	1	380	21	5	Positive
TG	TG 53:4 - 18:1	FALSE	886.786	Unit	587.503	Unit	10.529	1	380	21	5	Positive
TG	TG 53:4 - 18:2	FALSE	886.786	Unit	589.519	Unit	10.548	1	380	21	5	Positive
TG	TG 54:3	FALSE	902.817	Unit	902.817	Unit	11.01	1	380	2	5	Positive
TG	TG 54:3 - 16:0	FALSE	902.817	Unit	629.55	Unit	11.01	1	380	21	5	Positive
TG	TG 54:3 - 18:0	FALSE	902.817	Unit	601.519	Unit	11.029	1	380	21	5	Positive
TG	TG 54:3 - 18:1	FALSE	902.817	Unit	603.534	Unit	11.01	1	380	21	5	Positive
TG	TG 54:3 - 18:2	FALSE	902.817	Unit	605.55	Unit	11.029	1	380	21	5	Positive
TG	TG 54:3 - 20:2	FALSE	902.817	Unit	577.519	Unit	11.01	1	380	21	5	Positive
TG	TG 54:4	FALSE	900.802	Unit	900.801	Unit	10.716	1	380	2	5	Positive
TG	TG 54:4 - 16:0	FALSE	900.802	Unit	627.534	Unit	10.754	1	380	21	5	Positive
TG	TG 54:4 - 18:0	FALSE	900.802	Unit	599.503	Unit	10.754	1	380	21	5	Positive
TG	TG 54:4 - 18:1	FALSE	900.802	Unit	601.518	Unit	10.716	1	380	21	5	Positive
TG	TG 54:4 - 18:2	FALSE	900.802	Unit	603.534	Unit	10.735	1	380	21	5	Positive
TG	TG 54:4 - 20:2	FALSE	900.802	Unit	575.503	Unit	10.716	1	380	21	5	Positive
TG	TG 54:5	FALSE	898.786	Unit	898.786	Unit	10.412	1	380	2	5	Positive
TG	TG 54:5 - 16:0	FALSE	898.786	Unit	625.519	Unit	10.603	1	380	21	5	Positive
TG	TG 54:5 - 18:1	FALSE	898.786	Unit	599.503	Unit	10.431	1	380	21	5	Positive
TG	TG 54:5 - 18:2	FALSE	898.786	Unit	601.519	Unit	10.412	1	380	21	5	Positive
TG	TG 54:5 - 18:3	FALSE	898.786	Unit	603.534	Unit	10.469	1	380	21	5	Positive
TG	TG 54:5 - 20:3	FALSE	898.786	Unit	575.503	Unit	10.469	1	380	21	5	Positive
TG	TG 54:5 - 20:4	FALSE	898.786	Unit	577.519	Unit	10.603	1	380	21	5	Positive
TG	TG 54:6	FALSE	896.77	Unit	896.77	Unit	10.062	1	380	2	5	Positive
TG	TG 54:6 - 16:0	FALSE	896.77	Unit	623.503	Unit	10.294	1	380	21	5	Positive
TG	TG 54:6 - 18:1	FALSE	896.77	Unit	597.487	Unit	10.101	1	380	21	5	Positive
TG	TG 54:6 - 18:2	FALSE	896.77	Unit	599.503	Unit	10.062	1	380	21	5	Positive
TG	TG 54:6 - 18:3	FALSE	896.77	Unit	601.519	Unit	10.101	1	380	21	5	Positive
TG	TG 54:6 - 20:4	FALSE	896.77	Unit	575.503	Unit	10.256	1	380	21	5	Positive
TG	TG 54:6 - 20:5	FALSE	896.77	Unit	577.519	Unit	10.315	1	380	21	5	Positive
TG	TG 54:7	FALSE	894.755	Unit	894.755	Unit	9.872	1	380	2	5	Positive
TG	TG 54:7 - 18:1	FALSE	894.755	Unit	595.471	Unit	10.063	1	380	21	5	Positive
TG	TG 54:7 - 18:2	FALSE	894.755	Unit	597.487	Unit	9.701	1	380	21	5	Positive
TG	TG 54:7 - 18:3	FALSE	894.755	Unit	599.503	Unit	9.701	1	380	21	5	Positive
TG	TG 54:7 - 22:5	FALSE	894.755	Unit	547.471	Unit	9.834	1	380	21	5	Positive
TG	TG 54:7 - 22:6	FALSE	894.755	Unit	549.487	Unit	10.026	1	380	21	5	Positive
TG	TG 56:5	FALSE	926.817	Unit	926.817	Unit	10.862	1	380	2	5	Positive
TG	TG 56:5 - 16:0	FALSE	926.817	Unit	653.55	Unit	10.862	1	380	21	5	Positive
TG	TG 56:5 - 18:1	FALSE	926.817	Unit	627.534	Unit	10.788	1	380	21	5	Positive
TG	TG 56:5 - 18:2	FALSE	926.817	Unit	629.55	Unit	10.768	1	380	21	5	Positive
TG	TG 56:5 - 20:2	FALSE	926.817	Unit	601.519	Unit	10.768	1	380	21	5	Positive
TG	TG 56:5 - 20:3	FALSE	926.817	Unit	603.534	Unit	10.825	1	380	21	5	Positive
TG	TG 56:5 - 22:4	FALSE	926.817	Unit	577.519	Unit	10.862	1	380	21	5	Positive
TG	TG 56:6	FALSE	924.802	Unit	924.802	Unit	10.561	1	380	2	5	Positive
TG	TG 56:6 - 16:0	FALSE	924.802	Unit	651.534	Unit	10.58	1	380	21	5	Positive
TG	TG 56:6 - 18:1	FALSE	924.802	Unit	625.519	Unit	10.637	1	380	21	5	Positive
TG	TG 56:6 - 18:2	FALSE	924.802	Unit	627.534	Unit	10.485	1	380	21	5	Positive
TG	TG 56:6 - 20:2	FALSE	924.802	Unit	599.503	Unit	10.485	1	380	21	5	Positive
TG	TG 56:6 - 20:3	FALSE	924.802	Unit	601.519	Unit	10.504	1	380	21	5	Positive
TG	TG 56:6 - 20:4	FALSE	924.802	Unit	603.534	Unit	10.637	1	380	21	5	Positive
TG	TG 56:6 - 22:4	FALSE	924.802	Unit	575.503	Unit	10.58	1	380	21	5	Positive
TG	TG 56:6 - 22:5	FALSE	924.802	Unit	577.519	Unit	10.599	1	380	21	5	Positive
TG	TG 56:7	FALSE	922.786	Unit	922.786	Unit	10.752	1	380	2	5	Positive
TG	TG 56:7 - 16:0	FALSE	922.786	Unit	649.519	Unit	10.467	1	380	21	5	Positive
TG	TG 56:7 - 18:1	FALSE	922.786	Unit	623.503	Unit	10.312	1	380	21	5	Positive
TG	TG 56:7 - 18:2	FALSE	922.786	Unit	625.519	Unit	10.312	1	380	21	5	Positive
TG	TG 56:7 - 20:3	FALSE	922.786	Unit	599.503	Unit	10.312	1	380	21	5	Positive
TG	TG 56:7 - 20:4	FALSE	922.786	Unit	601.519	Unit	10.331	1	380	21	5	Positive
TG	TG 56:7 - 22:5	FALSE	922.786	Unit	575.503	Unit	10.272	1	380	21	5	Positive
TG	TG 56:7 - 22:6	FALSE	922.786	Unit	577.519	Unit	10.448	1	380	21	5	Positive
TG	TG 56:8	FALSE	920.77	Unit	920.77	Unit	10.429	1	380	2	5	Positive
TG	TG 56:8 - 18:1	FALSE	920.77	Unit	621.487	Unit	10.042	1	380	21	5	Positive
TG	TG 56:8 - 18:2	FALSE	920.77	Unit	623.503	Unit	9.966	1	380	21	5	Positive
TG	TG 56:8 - 20:4	FALSE	920.77	Unit	599.503	Unit	9.984	1	380	21	5	Positive
TG	TG 56:8 - 22:5	FALSE	920.77	Unit	573.487	Unit	10.023	1	380	21	5	Positive
TG	TG 56:8 - 22:6	FALSE	920.77	Unit	575.503	Unit	10.119	1	380	21	5	Positive
TG	TG 58:8	FALSE	948.802	Unit	948.801	Unit	10.842	1	380	2	5	Positive
TG	TG 58:8 - 18:1	FALSE	948.802	Unit	649.518	Unit	10.328	1	380	21	5	Positive
TG	TG 58:8 - 18:2	FALSE	948.802	Unit	651.534	Unit	10.289	1	380	21	5	Positive
TG	TG 58:8 - 22:5	FALSE	948.802	Unit	601.518	Unit	10.464	1	380	21	5	Positive
TG	TG 58:8 - 22:6	FALSE	948.802	Unit	603.534	Unit	10.502	1	380	21	5	Positive

## Sheet: Phospholipids MRM
Compound Group	Compound Name	ISTD?	Precursor Ion	MS1 Res	Product Ion	MS2 Res	Dwell	Fragmentor	Collision Energy	Cell Accelerator Voltage	Polarity
LPE	LPE 14:0 (IS)	TRUE	426.3	Unit	285.2	Unit	7	380	17	5	Positive
LPE	LPE 15:1/LPE O-16:1/LPE P-16:0	FALSE	438.3	Unit	297.3	Unit	7	380	17	5	Positive
LPE	LPE 16:2	FALSE	450.3	Unit	309.3	Unit	7	380	17	5	Positive
LPE	LPE 16:1	FALSE	452.3	Unit	311.3	Unit	7	380	17	5	Positive
LPE	LPE 16:0	FALSE	454.3	Unit	313.3	Unit	7	380	17	5	Positive
LPE	LPE 17:1/LPE O-18:1/LPE P-18:0	FALSE	466.3	Unit	325.3	Unit	7	380	17	5	Positive
LPE	LPE 18:2	FALSE	478.3	Unit	337.3	Unit	7	380	17	5	Positive
LPE	LPE 18:1	FALSE	480.3	Unit	339.3	Unit	7	380	17	5	Positive
LPE	LPE 18:0	FALSE	482.3	Unit	341.3	Unit	7	380	17	5	Positive
LPE	LPE 20:0	FALSE	510.3	Unit	369.3	Unit	7	380	17	5	Positive
LPE	LPE 20:1	FALSE	508.3	Unit	367.3	Unit	7	380	17	5	Positive
LPE	LPE 20:2	FALSE	506.3	Unit	365.3	Unit	7	380	17	5	Positive
LPE	LPE 20:4	FALSE	502.3	Unit	361.3	Unit	7	380	17	5	Positive
LPE	LPE 20:5	FALSE	500.3	Unit	359.3	Unit	7	380	17	5	Positive
LPE	LPE 20:3	FALSE	504.3	Unit	363.3	Unit	7	380	17	5	Positive
LPE	LPE 22:6	FALSE	526.3	Unit	385.3	Unit	7	380	17	5	Positive
LPE	LPE 22:5	FALSE	528.3	Unit	389.3	Unit	7	380	17	5	Positive
PE	PE 28:0 (IS)	TRUE	636.5	Unit	495.5	Unit	7	380	17	5	Positive
PE	PE 32:3	FALSE	686.5	Unit	545.5	Unit	7	380	17	5	Positive
PE	PE 32:2	FALSE	688.5	Unit	547.5	Unit	7	380	17	5	Positive
PE	PE 32:1	FALSE	690.5	Unit	549.5	Unit	7	380	17	5	Positive
PE	PE 32:0	FALSE	692.5	Unit	551.5	Unit	7	380	17	5	Positive
PE	PE 33:3/PE O-34:3/PE P-34:2	FALSE	700.5	Unit	559.5	Unit	7	380	17	5	Positive
PE	PE 33:2/PE O-34:2/PE P-34:1	FALSE	702.5	Unit	561.5	Unit	7	380	17	5	Positive
PE	PE 33:1/PE O-34:1/PE P-34:0	FALSE	704.5	Unit	563.5	Unit	7	380	17	5	Positive
PE	PE 33:0/PE O-34:0	FALSE	706.5	Unit	565.5	Unit	7	380	17	5	Positive
PE	PE 34:3	FALSE	714.5	Unit	573.5	Unit	7	380	17	5	Positive
PE	PE 34:2	FALSE	716.5	Unit	575.5	Unit	7	380	17	5	Positive
PE	PE 34:1	FALSE	718.5	Unit	577.5	Unit	7	380	17	5	Positive
PE	PE 34:0	FALSE	720.5	Unit	579.5	Unit	7	380	17	5	Positive
PE	PE 35:6/PE O-36:6/PE P-36:5	FALSE	722.5	Unit	581.5	Unit	7	380	17	5	Positive
PE	PE 35:5/PE O-36:5/PE P-36:4	FALSE	724.5	Unit	583.5	Unit	7	380	17	5	Positive
PE	PE 35:4/PE O-36:4/PE P-36:3	FALSE	726.5	Unit	585.5	Unit	7	380	17	5	Positive
PE	PE 35:3/PE O-36:3/PE P-36:2	FALSE	728.6	Unit	587.5	Unit	7	380	17	5	Positive
PE	PE 35:2/PE O-36:2/PE P-36:1	FALSE	730.5	Unit	589.5	Unit	7	380	17	5	Positive
PE	PE 35:1/PE O-36:1/PE P-36:0	FALSE	732.6	Unit	591.5	Unit	7	380	17	5	Positive
PE	PE 35:0/PE O-36:0	FALSE	734.5	Unit	593.5	Unit	7	380	17	5	Positive
PE	PE 36:6	FALSE	736.6	Unit	595.5	Unit	7	380	17	5	Positive
PE	PE 36:5	FALSE	738.5	Unit	597.5	Unit	7	380	17	5	Positive
PE	PE 36:4	FALSE	740.5	Unit	599.5	Unit	7	380	17	5	Positive
PE	PE 36:3	FALSE	742.5	Unit	601.5	Unit	7	380	17	5	Positive
PE	PE 36:2	FALSE	744.6	Unit	603.5	Unit	7	380	17	5	Positive
PE	PE 36:1	FALSE	746.6	Unit	605.6	Unit	7	380	17	5	Positive
PE	PE 36:0/PE 37:7/PE O-38:7/PE P-38:6	FALSE	748.6	Unit	607.6	Unit	7	380	17	5	Positive
PE	PE 37:6/PE O-38:6/PE P-38:5	FALSE	750.5	Unit	609.6	Unit	7	380	17	5	Positive
PE	PE 37:5/PE O-38:5/PE P-38:4	FALSE	752.6	Unit	611.5	Unit	7	380	17	5	Positive
PE	PE 37:4/PE O-38:4/PE P-38:3	FALSE	754.6	Unit	613.6	Unit	7	380	17	5	Positive
PE	PE 37:3/PE O-38:3/PE P-38:2	FALSE	756.6	Unit	615.6	Unit	7	380	17	5	Positive
PE	PE 37:2/PE O-38:2/PE P-38:1	FALSE	758.6	Unit	617.6	Unit	7	380	17	5	Positive
PE	PE 37:1/PE O-38:1/PE P-38:0	FALSE	760.6	Unit	619.6	Unit	7	380	17	5	Positive
PE	PE 38:7/PE 37:0/PE O-38:0	FALSE	762.5	Unit	621.5	Unit	7	380	17	5	Positive
PE	PE 38:6	FALSE	764.5	Unit	623.5	Unit	7	380	17	5	Positive
PE	PE 38:5	FALSE	766.5	Unit	625.5	Unit	7	380	17	5	Positive
PE	PE 38:4	FALSE	768.6	Unit	627.5	Unit	7	380	17	5	Positive
PE	PE 38:3	FALSE	770.6	Unit	629.6	Unit	7	380	17	5	Positive
PE	PE 38:2	FALSE	772.6	Unit	631.6	Unit	7	380	17	5	Positive
PE	PE 38:1/PE 39:8/PE O-40:8/PE P-40:7	FALSE	774.6	Unit	633.5	Unit	7	380	17	5	Positive
PE	PE 38:0/PE 39:7/PE O-40:7/PE P-40:6	FALSE	776.6	Unit	635.5	Unit	7	380	17	5	Positive
PE	PE 39:6/PE O-40:6/PE P-40:5	FALSE	778.5	Unit	637.5	Unit	7	380	17	5	Positive
PE	PE 39:5/PE O-40:5/PE P-40:4	FALSE	780.6	Unit	639.6	Unit	7	380	17	5	Positive
PE	PE 40:8	FALSE	788.5	Unit	647.5	Unit	7	380	17	5	Positive
PE	PE 40:7	FALSE	790.5	Unit	649.5	Unit	7	380	17	5	Positive
PE	PE 40:6	FALSE	792.6	Unit	651.5	Unit	7	380	17	5	Positive
PE	PE 40:5	FALSE	794.6	Unit	653.6	Unit	7	380	17	5	Positive
PE	PE 40:4	FALSE	796.6	Unit	655.6	Unit	7	380	17	5	Positive
PE	PE 40:3	FALSE	798.6	Unit	657.6	Unit	7	380	17	5	Positive
PE	PE 40:2	FALSE	800.6	Unit	659.6	Unit	7	380	17	5	Positive
PE	PE 40:1/PE 41:8/PE-O 42:8/PE-P 42:7	FALSE	802.6	Unit	661.6	Unit	7	380	17	5	Positive
PE	PE 40:0/PE 41:7/PE O-42:7/PE P-42:6	FALSE	804.6	Unit	663.6	Unit	7	380	17	5	Positive
PE	PE 41:6/PE O-42:6/PE P-42:5	FALSE	806.6	Unit	665.6	Unit	7	380	17	5	Positive
PE	PE 41:5/PE O-42:5/PE P-42:4	FALSE	808.6	Unit	667.6	Unit	7	380	17	5	Positive
PE	PE 42:11/PE 41:4/PE O-42:4/PE P-42:3	FALSE	810.6	Unit	669.6	Unit	7	380	17	5	Positive
PE	PE 42:10/PE 41:3/PE O-42:3/PE P-42:2	FALSE	812.6	Unit	671.6	Unit	7	380	17	5	Positive
PE	PE 42:9/PE 41:2/PE O-42:2/PE P-42:1	FALSE	814.7	Unit	673.7	Unit	7	380	17	5	Positive
PE	PE 42:8/PE 41:1/PE O-42:1/PE P-42:0	FALSE	816.7	Unit	675.7	Unit	7	380	17	5	Positive
PE	PE 42:7	FALSE	818.6	Unit	677.6	Unit	7	380	17	5	Positive
PE	PE 42:6	FALSE	820.6	Unit	679.6	Unit	7	380	17	5	Positive
PE	PE 42:5	FALSE	822.6	Unit	681.6	Unit	7	380	17	5	Positive
PE	PE 42:4	FALSE	824.6	Unit	683.6	Unit	7	380	17	5	Positive
PE	PE 44:6	FALSE	830.5	Unit	689.5	Unit	7	380	17	5	Positive
PE	PE 44:12	FALSE	836.5	Unit	695.5	Unit	7	380	17	5	Positive
PG	PG 14:0/14:0 (IS)_Neg	TRUE	665.5	Unit	153	Unit	7	380	35	7	Negative
PG	PG 32:2_Neg	FALSE	717.5	Unit	153	Unit	7	380	35	7	Negative
PG	PG 32:1_Neg	FALSE	719.5	Unit	153	Unit	7	380	35	7	Negative
PG	PG 32:0_Neg	FALSE	721.5	Unit	153	Unit	7	380	35	7	Negative
PG	PG 34:4_Neg	FALSE	741.5	Unit	153	Unit	7	380	35	7	Negative
PG	PG 34:3_Neg	FALSE	743.5	Unit	153	Unit	7	380	35	7	Negative
PG	PG 34:2_Neg	FALSE	745.5	Unit	153	Unit	7	380	35	7	Negative
PG	PG 34:1_Neg	FALSE	747.5	Unit	153	Unit	7	380	35	7	Negative
PG	PG 34:0_Neg	FALSE	749.5	Unit	153	Unit	7	380	35	7	Negative
PG	PG 36:5_Neg	FALSE	767.5	Unit	153	Unit	7	380	35	7	Negative
PG	PG 36:4_Neg	FALSE	769.5	Unit	153	Unit	7	380	35	7	Negative
PG	PG 36:3_Neg	FALSE	771.5	Unit	153	Unit	7	380	35	7	Negative
PG	PG 36:2_Neg	FALSE	773.5	Unit	153	Unit	7	380	35	7	Negative
PG	PG 36:1_Neg	FALSE	775.5	Unit	153	Unit	7	380	35	7	Negative
PG	PG 36:0_Neg	FALSE	777.5	Unit	153	Unit	7	380	35	7	Negative
PG	PG 38:6_Neg	FALSE	793.5	Unit	153	Unit	7	380	35	7	Negative
PG	PG 38:5_Neg	FALSE	795.5	Unit	153	Unit	7	380	35	7	Negative
PG	PG 38:4_Neg	FALSE	797.5	Unit	153	Unit	7	380	35	7	Negative
PG	PG 40:8_Neg	FALSE	817.5	Unit	153	Unit	7	380	35	7	Negative
PG	PG 40:7_Neg	FALSE	819.5	Unit	153	Unit	7	380	35	7	Negative
PG	PG 40:6_Neg	FALSE	821.5	Unit	153	Unit	7	380	35	7	Negative
PG	PG 40:5_Neg	FALSE	823.5	Unit	153	Unit	7	380	35	7	Negative
PG	PG 42:6_Neg	FALSE	849.5	Unit	153	Unit	7	380	35	7	Negative
PG	PG 42:5_Neg	FALSE	851.5	Unit	153	Unit	7	380	35	7	Negative
PG	PG 44:12_Neg	FALSE	865.5	Unit	153	Unit	7	380	35	7	Negative
PG	PG 46:12_Neg	FALSE	893.5	Unit	153	Unit	7	380	35	7	Negative
PG	PG 28:0 (IS)	TRUE	684.6	Unit	495.5	Unit	7	380	17	7	Positive
PG	PG 32:2	FALSE	736.5	Unit	547.4	Unit	7	380	17	7	Positive
PG	PG 32:1	FALSE	738.5	Unit	549.4	Unit	7	380	17	7	Positive
PG	PG 32:0	FALSE	740.5	Unit	551.4	Unit	7	380	17	7	Positive
PG	PG 34:4	FALSE	760.5	Unit	571.4	Unit	7	380	17	7	Positive
PG	PG 34:3	FALSE	762.5	Unit	573.4	Unit	7	380	17	7	Positive
PG	PG 34:2	FALSE	764.5	Unit	575.4	Unit	7	380	17	7	Positive
PG	PG 34:1	FALSE	766.5	Unit	577.4	Unit	7	380	17	7	Positive
PG	PG 34:0	FALSE	768.5	Unit	579.4	Unit	7	380	17	7	Positive
PG	PG 36:5	FALSE	786.5	Unit	597.4	Unit	7	380	17	7	Positive
PG	PG 36:4	FALSE	788.5	Unit	599.4	Unit	7	380	17	7	Positive
PG	PG 36:3	FALSE	790.5	Unit	601.4	Unit	7	380	17	7	Positive
PG	PG 36:2	FALSE	792.5	Unit	603.4	Unit	7	380	17	7	Positive
PG	PG 36:1	FALSE	794.5	Unit	605.4	Unit	7	380	17	7	Positive
PG	PG 36:0	FALSE	796.5	Unit	607.4	Unit	7	380	17	7	Positive
PG	PG 38:6	FALSE	812.5	Unit	623.4	Unit	7	380	17	7	Positive
PG	PG 38:5	FALSE	814.5	Unit	625.4	Unit	7	380	17	7	Positive
PG	PG 38:4	FALSE	816.5	Unit	627.4	Unit	7	380	17	7	Positive
PG	PG 40:8	FALSE	836.5	Unit	647.4	Unit	7	380	17	7	Positive
PG	PG 40:7	FALSE	838.5	Unit	649.4	Unit	7	380	17	7	Positive
PG	PG 40:6	FALSE	840.5	Unit	651.4	Unit	7	380	17	7	Positive
PG	PG 40:5	FALSE	842.5	Unit	653.4	Unit	7	380	17	7	Positive
PG	PG 42:6	FALSE	868.6	Unit	679.5	Unit	7	380	17	7	Positive
PG	PG 42:5	FALSE	870.6	Unit	681.5	Unit	7	380	17	7	Positive
PG	PG 44:12	FALSE	884.5	Unit	695.4	Unit	7	380	17	7	Positive
PG	PG 46:12	FALSE	912.5	Unit	723.4	Unit	7	380	17	7	Positive
LPI	LPI 16:0	FALSE	571.3	Unit	241.1	Unit	7	380	20	5	Negative
LPI	LPI 16:1	FALSE	569.3	Unit	241.1	Unit	7	380	20	5	Negative
LPI	LPI 18:0	FALSE	599.3	Unit	241.1	Unit	7	380	20	5	Negative
LPI	LPI 18:1	FALSE	597.3	Unit	241.1	Unit	7	380	20	5	Negative
LPI	LPI 18:2	FALSE	595.3	Unit	241.1	Unit	7	380	20	5	Negative
LPI	LPI 20:3	FALSE	621.3	Unit	241.1	Unit	7	380	20	5	Negative
LPI	LPI 20:4	FALSE	619.3	Unit	241.1	Unit	7	380	20	5	Negative
LPI	LPI 22:6	FALSE	643.3	Unit	241.1	Unit	7	380	20	5	Negative
PI	PI 12:0/13:0 (IS)	TRUE	711.4	Unit	241.1	Unit	7	380	20	5	Negative
PI	PI 32:3	FALSE	822.5	Unit	241.1	Unit	7	380	20	5	Negative
PI	PI 32:2	FALSE	824.5	Unit	241.1	Unit	7	380	20	5	Negative
PI	PI 32:1	FALSE	826.5	Unit	241.1	Unit	7	380	20	5	Negative
PI	PI 32:0	FALSE	828.6	Unit	241.1	Unit	7	380	20	5	Negative
PI	PI 34:4	FALSE	848.6	Unit	241.1	Unit	7	380	20	5	Negative
PI	PI 34:3	FALSE	850.6	Unit	241.1	Unit	7	380	20	5	Negative
PI	PI 34:2	FALSE	852.6	Unit	241.1	Unit	7	380	20	5	Negative
PI	PI 34:1	FALSE	854.6	Unit	241.1	Unit	7	380	20	5	Negative
PI	PI 36:6	FALSE	853.5	Unit	241.1	Unit	7	380	20	5	Negative
PI	PI 36:5	FALSE	855.5	Unit	241.1	Unit	7	380	20	5	Negative
PI	PI 34:0	FALSE	856.6	Unit	241.1	Unit	7	380	20	5	Negative
PI	PI 36:4	FALSE	857.5	Unit	241.1	Unit	7	380	20	5	Negative
PI	PI 36:3	FALSE	859.5	Unit	241.1	Unit	7	380	20	5	Negative
PI	PI 36:2	FALSE	861.5	Unit	241.1	Unit	7	380	20	5	Negative
PI	PI 36:1	FALSE	863.6	Unit	241.1	Unit	7	380	20	5	Negative
PI	PI 36:0	FALSE	865.6	Unit	241.1	Unit	7	380	20	5	Negative
PI	PI 38:7	FALSE	879.5	Unit	241.1	Unit	7	380	20	5	Negative
PI	PI 38:6	FALSE	881.5	Unit	241.1	Unit	7	380	20	5	Negative
PI	PI 38:5	FALSE	883.5	Unit	241.1	Unit	7	380	20	5	Negative
PI	PI 38:4	FALSE	885.5	Unit	241.1	Unit	7	380	20	5	Negative
PI	PI 38:3	FALSE	887.6	Unit	241.1	Unit	7	380	20	5	Negative
PI	PI 38:2	FALSE	889.6	Unit	241.1	Unit	7	380	20	5	Negative
PI	PI 40:8	FALSE	905.5	Unit	241.1	Unit	7	380	20	5	Negative
PI	PI 40:7	FALSE	907.5	Unit	241.1	Unit	7	380	20	5	Negative
PI	PI 40:6	FALSE	909.5	Unit	241.1	Unit	7	380	20	5	Negative
PI	PI 40:5	FALSE	911.6	Unit	241.1	Unit	7	380	20	5	Negative
PI	PI 40:4	FALSE	913.6	Unit	241.1	Unit	7	380	20	5	Negative
PI	PI 42:8	FALSE	933.5	Unit	241.1	Unit	7	380	20	5	Negative
PI	PI 42:7	FALSE	935.6	Unit	241.1	Unit	7	380	20	5	Negative
PI	PI 42:6	FALSE	937.6	Unit	241.1	Unit	7	380	20	5	Negative
PI	PI 42:5	FALSE	939.6	Unit	241.1	Unit	7	380	20	5	Negative
PI	PI 42:4	FALSE	941.6	Unit	241.1	Unit	7	380	20	5	Negative
LPC	LPC 14:1	FALSE	466.3	Unit	184.1	Unit	6	380	21	5	Positive
LPC	LPC 14:0	FALSE	468.3	Unit	184.1	Unit	6	380	21	5	Positive
LPC	LPC 15:1/LPC O-16:1/LPC P-16:0	FALSE	480.3	Unit	184.1	Unit	6	380	21	5	Positive
LPC	LPC 15:0/LPC O-16:0	FALSE	482.3	Unit	184.1	Unit	6	380	21	5	Positive
LPC	LPC 16:2	FALSE	492.3	Unit	184.1	Unit	6	380	21	5	Positive
LPC	LPC 16:1	FALSE	494.3	Unit	184.1	Unit	6	380	21	5	Positive
LPC	LPC 16:0	FALSE	496.3	Unit	184.1	Unit	6	380	21	5	Positive
LPC	LPC 17:0/LPC O-18:1/LPC P-18:0	FALSE	508.4	Unit	184.1	Unit	6	380	21	5	Positive
LPC	LPC 17:0/LPC O-18:0	FALSE	510.4	Unit	184.1	Unit	6	380	21	5	Positive
LPC	LPC 18:3	FALSE	518.3	Unit	184.1	Unit	6	380	21	5	Positive
LPC	LPC 18:2	FALSE	520.3	Unit	184.1	Unit	6	380	21	5	Positive
LPC	LPC 18:1	FALSE	522.4	Unit	184.1	Unit	6	380	21	5	Positive
LPC	LPC 18:0 or PAF 16:0	FALSE	524.4	Unit	184.1	Unit	6	380	21	5	Positive
LPC	LPC 20:5	FALSE	542.3	Unit	184.1	Unit	6	380	21	5	Positive
LPC	LPC 20:4	FALSE	544.3	Unit	184.1	Unit	6	380	21	5	Positive
LPC	LPC 20:3	FALSE	546.4	Unit	184.1	Unit	6	380	21	5	Positive
LPC	LPC 20:2	FALSE	548.4	Unit	184.1	Unit	6	380	21	5	Positive
LPC	LPC 20:1	FALSE	550.4	Unit	184.1	Unit	6	380	21	5	Positive
LPC	LPC 20:0 (IS)	TRUE	552.4	Unit	184.1	Unit	6	380	21	5	Positive
LPC	LPC 22:6	FALSE	568.3	Unit	184.1	Unit	6	380	21	5	Positive
LPC	LPC 22:5	FALSE	570.4	Unit	184.1	Unit	6	380	21	5	Positive
LPC	LPC 22:4	FALSE	572.3	Unit	184.1	Unit	6	380	21	5	Positive
LPC	LPC 22:2	FALSE	576.4	Unit	184.1	Unit	6	380	21	5	Positive
LPC	LPC 22:1	FALSE	578.4	Unit	184.1	Unit	6	380	21	5	Positive
LPC	LPC 22:0	FALSE	580.4	Unit	184.1	Unit	6	380	21	5	Positive
LPC	LPC 24:6	FALSE	596.4	Unit	184.1	Unit	6	380	21	5	Positive
PC	PC 28:0 (IS)	TRUE	678.5	Unit	184.1	Unit	6	380	21	5	Positive
PC	PC 29:1/PC O-30:1/PC P-30:0	FALSE	690.5	Unit	184.1	Unit	6	380	21	5	Positive
PC	PC 29:0/PC O-30:0	FALSE	692.5	Unit	184.1	Unit	6	380	21	5	Positive
PC	PC 30:2	FALSE	702.5	Unit	184.1	Unit	6	380	21	5	Positive
PC	PC 30:1	FALSE	704.5	Unit	184.1	Unit	6	380	21	5	Positive
PC	PC 30:0	FALSE	706.5	Unit	184.1	Unit	6	380	21	5	Positive
PC	PC 31:2/PC O-32:2/PC P-32:1	FALSE	716.6	Unit	184.1	Unit	6	380	21	5	Positive
PC	PC 31:1/PC O-32:1/PC P-32:0	FALSE	718.5	Unit	184.1	Unit	6	380	21	5	Positive
PC	PC 31:0/PC O-32:0	FALSE	720.6	Unit	184.1	Unit	6	380	21	5	Positive
PC	PC 32:3	FALSE	728.5	Unit	184.1	Unit	6	380	21	5	Positive
PC	PC 32:2	FALSE	730.5	Unit	184.1	Unit	6	380	21	5	Positive
PC	PC 32:1	FALSE	732.6	Unit	184.1	Unit	6	380	21	5	Positive
PC	PC 32:0	FALSE	734.6	Unit	184.1	Unit	6	380	21	5	Positive
PC	PC 33:4/PC O-34:4/PC P-34:3	FALSE	740.6	Unit	184.1	Unit	6	380	21	5	Positive
PC	PC 33:3/PC O-34:3/PC P-34:2	FALSE	742.5	Unit	184.1	Unit	6	380	21	5	Positive
PC	PC 33:2/PC O-34:2/PC P-34:1	FALSE	744.6	Unit	184.1	Unit	6	380	21	5	Positive
PC	PC 33:1/PC O-34:1	FALSE	746.6	Unit	184.1	Unit	6	380	21	5	Positive
PC	PC 33:0	FALSE	748.6	Unit	184.1	Unit	6	380	21	5	Positive
PC	PC 34:5	FALSE	752.5	Unit	184.1	Unit	6	380	21	5	Positive
PC	PC 34:4	FALSE	754.5	Unit	184.1	Unit	6	380	21	5	Positive
PC	PC 34:3	FALSE	756.6	Unit	184.1	Unit	6	380	21	5	Positive
PC	PC 34:2	FALSE	758.6	Unit	184.1	Unit	6	380	21	5	Positive
PC	PC 34:1	FALSE	760.6	Unit	184.1	Unit	6	380	21	5	Positive
PC	PC 34:0	FALSE	762.6	Unit	184.1	Unit	6	380	21	5	Positive
PC	PC 35:5/PC O-36:5/PC P-36:4	FALSE	766.6	Unit	184.1	Unit	6	380	21	5	Positive
PC	PC 35:4/PC O-36:4/PC P-36:3	FALSE	768.6	Unit	184.1	Unit	6	380	21	5	Positive
PC	PC 35:3/PC O-36:3/PC P-36:2	FALSE	770.6	Unit	184.1	Unit	6	380	21	5	Positive
PC	PC 35:2/PC O-36:2	FALSE	772.6	Unit	184.1	Unit	6	380	21	5	Positive
PC	PC 35:1/PC O-36:1	FALSE	774.6	Unit	184.1	Unit	6	380	21	5	Positive
PC	PC 36:7/PC 35:0/PC O-36:0	FALSE	776.6	Unit	184.1	Unit	6	380	21	5	Positive
PC	PC 36:6	FALSE	778.5	Unit	184.1	Unit	6	380	21	5	Positive
PC	PC 36:5	FALSE	780.6	Unit	184.1	Unit	6	380	21	5	Positive
PC	PC 36:4	FALSE	782.6	Unit	184.1	Unit	6	380	21	5	Positive
PC	PC 36:3	FALSE	784.6	Unit	184.1	Unit	6	380	21	5	Positive
PC	PC 36:2	FALSE	786.6	Unit	184.1	Unit	6	380	21	5	Positive
PC	PC 36:1	FALSE	788.6	Unit	184.1	Unit	6	380	21	5	Positive
PC	PC 36:0/PC 37:7/PC O-38:7/PC P-38:6	FALSE	790.6	Unit	184.1	Unit	6	380	21	5	Positive
PC	PC 37:6/PC O-38:6/PC P-38:5	FALSE	792.6	Unit	184.1	Unit	6	380	21	5	Positive
PC	PC 37:5/PC O-38:5/PC P-38:4	FALSE	794.6	Unit	184.1	Unit	6	380	21	5	Positive
PC	PC 37:4/PC O-38:4/PC P-38:3	FALSE	796.6	Unit	184.1	Unit	6	380	21	5	Positive
PC	PC 37:3/PC O-38:3/PC P-38:2	FALSE	798.6	Unit	184.1	Unit	6	380	21	5	Positive
PC	PC 38:9/PC 37:2/PC O-38:2/PC P-38:1	FALSE	800.6	Unit	184.1	Unit	6	380	21	5	Positive
PC	PC 38:8/PC 37:1/PC O-38:1/PC P-38:0	FALSE	802.6	Unit	184.1	Unit	6	380	21	5	Positive
PC	PC 38:7/PC 37:0/PC O-38:0	FALSE	804.6	Unit	184.1	Unit	6	380	21	5	Positive
PC	PC 38:6	FALSE	806.6	Unit	184.1	Unit	6	380	21	5	Positive
PC	PC 38:5	FALSE	808.6	Unit	184.1	Unit	6	380	21	5	Positive
PC	PC 38:4	FALSE	810.6	Unit	184.1	Unit	6	380	21	5	Positive
PC	PC 38:3	FALSE	812.6	Unit	184.1	Unit	6	380	21	5	Positive
PC	PC 38:2	FALSE	814.6	Unit	184.1	Unit	6	380	21	5	Positive
PC	PC 38:1/PC 39:8/PC O-40:8/PC P-40:7	FALSE	816.6	Unit	184.1	Unit	6	380	21	5	Positive
PC	PC 38:0/PC 39:7/PC O-40:7/PC P-40:6	FALSE	818.6	Unit	184.1	Unit	6	380	21	5	Positive
PC	PC 39:6/PC O-40:6/PC P-40:5	FALSE	820.6	Unit	184.1	Unit	6	380	21	5	Positive
PC	PC 39:5/PC O-40:5/PC P-40:4	FALSE	822.6	Unit	184.1	Unit	6	380	21	5	Positive
PC	PC 39:4/PC O-40:4/PC P-40:3	FALSE	824.6	Unit	184.1	Unit	6	380	21	5	Positive
PC	PC 40:10/PC 39:3/PC O-40:3/PC P-40:2	FALSE	826.6	Unit	184.1	Unit	6	380	21	5	Positive
PC	PC 40:9/PC 39:2/PC O-40:2/PC P-40:1	FALSE	828.6	Unit	184.1	Unit	6	380	21	5	Positive
PC	PC 40:8/PC 39:1/PC O-40:1/PC P-40:0	FALSE	830.6	Unit	184.1	Unit	6	380	21	5	Positive
PC	PC 40:7	FALSE	832.6	Unit	184.1	Unit	6	380	21	5	Positive
PC	PC 40:6	FALSE	834.6	Unit	184.1	Unit	6	380	21	5	Positive
PC	PC 40:5	FALSE	836.6	Unit	184.1	Unit	6	380	21	5	Positive
PC	PC 40:4	FALSE	838.6	Unit	184.1	Unit	6	380	21	5	Positive
PC	PC 40:3	FALSE	840.6	Unit	184.1	Unit	6	380	21	5	Positive
PC	PC 40:2	FALSE	842.6	Unit	184.1	Unit	6	380	21	5	Positive
PC	PC 40:1/PC 41:8/PC-O 42:8/PC-P 42:7	FALSE	844.6	Unit	184.1	Unit	6	380	21	5	Positive
PC	PC 40:0/PC 41:7/PC O-42:7/PC P-42:6	FALSE	846.6	Unit	184.1	Unit	6	380	21	5	Positive
PC	PC 41:6/PC O-42:6/PC P-42:5	FALSE	848.7	Unit	184.1	Unit	6	380	21	5	Positive
PC	PC 41:5/PC O-42:5/PC P-42:4	FALSE	850.7	Unit	184.1	Unit	6	380	21	5	Positive
PC	PC 41:4/PC O-42:4/PC P-42:3	FALSE	852.7	Unit	184.1	Unit	6	380	21	5	Positive
PC	PC 41:3/PC O-42:3/PC P-42:2	FALSE	854.7	Unit	184.1	Unit	6	380	21	5	Positive
PC	PC 41:2/PC O-42:2/PC P-42:1	FALSE	856.7	Unit	184.1	Unit	6	380	21	5	Positive
PC	PC 42:8/PC 41:1/PC O-42:1/PC P-42:0	FALSE	858.7	Unit	184.1	Unit	6	380	21	5	Positive
PC	PC 42:7	FALSE	860.6	Unit	184.1	Unit	6	380	21	5	Positive
PC	PC 42:6	FALSE	862.6	Unit	184.1	Unit	6	380	21	5	Positive
PC	PC 42:5	FALSE	864.6	Unit	184.1	Unit	6	380	21	5	Positive
PC	PC 42:4	FALSE	866.7	Unit	184.1	Unit	6	380	21	5	Positive
PC	PC 42:3	FALSE	868.7	Unit	184.1	Unit	6	380	21	5	Positive
PC	PC 42:2	FALSE	870.7	Unit	184.1	Unit	6	380	21	5	Positive
PC	PC 42:1	FALSE	872.7	Unit	184.1	Unit	6	380	21	5	Positive
PC	PC 42:0	FALSE	874.7	Unit	184.1	Unit	6	380	21	5	Positive
SM	SM 30:1 (IS)	TRUE	647.5	Unit	184.1	Unit	6	380	25	7	Positive
SM	SM 31:1	FALSE	661.5	Unit	184.1	Unit	6	380	25	7	Positive
SM	SM 32:2	FALSE	673.5	Unit	184.1	Unit	6	380	25	7	Positive
SM	SM 32:1	FALSE	675.5	Unit	184.1	Unit	6	380	25	7	Positive
SM	SM 32:0	FALSE	677.6	Unit	184.1	Unit	6	380	25	7	Positive
SM	SM 33:1	FALSE	689.6	Unit	184.1	Unit	6	380	25	7	Positive
SM	SM 34:3	FALSE	699.5	Unit	184.1	Unit	6	380	25	7	Positive
SM	SM 34:2	FALSE	701.6	Unit	184.1	Unit	6	380	25	7	Positive
SM	SM 34:1	FALSE	703.6	Unit	184.1	Unit	6	380	25	7	Positive
SM	SM 34:0	FALSE	705.6	Unit	184.1	Unit	6	380	25	7	Positive
SM	SM 35:2	FALSE	715.6	Unit	184.1	Unit	6	380	25	7	Positive
SM	SM 35:1	FALSE	717.6	Unit	184.1	Unit	6	380	25	7	Positive
SM	SM 36:3	FALSE	727.6	Unit	184.1	Unit	6	380	25	7	Positive
SM	SM 36:2	FALSE	729.6	Unit	184.1	Unit	6	380	25	7	Positive
SM	SM 36:1	FALSE	731.6	Unit	184.1	Unit	6	380	25	7	Positive
SM	SM 36:0	FALSE	733.6	Unit	184.1	Unit	6	380	25	7	Positive
SM	SM 37:2	FALSE	743.5	Unit	184.1	Unit	6	380	25	7	Positive
SM	SM 37:1	FALSE	745.5	Unit	184.1	Unit	6	380	25	7	Positive
SM	SM 37:0	FALSE	747.5	Unit	184.1	Unit	6	380	25	7	Positive
SM	SM 38:2	FALSE	757.6	Unit	184.1	Unit	6	380	25	7	Positive
SM	SM 38:1	FALSE	759.6	Unit	184.1	Unit	6	380	25	7	Positive
SM	SM 38:0	FALSE	761.8	Unit	184.1	Unit	6	380	25	7	Positive
SM	SM 39:1	FALSE	773.7	Unit	184.1	Unit	6	380	25	7	Positive
SM	SM 40:3	FALSE	783.7	Unit	184.1	Unit	6	380	25	7	Positive
SM	SM 40:2	FALSE	785.7	Unit	184.1	Unit	6	380	25	7	Positive
SM	SM 40:1	FALSE	787.7	Unit	184.1	Unit	6	380	25	7	Positive
SM	SM 40:0	FALSE	789.9	Unit	184.1	Unit	6	380	25	7	Positive
SM	SM 41:2	FALSE	799.7	Unit	184.1	Unit	6	380	25	7	Positive
SM	SM 41:1	FALSE	801.7	Unit	184.1	Unit	6	380	25	7	Positive
SM	SM 41:0	FALSE	803.7	Unit	184.1	Unit	6	380	25	7	Positive
SM	SM 42:3	FALSE	811.6	Unit	184.1	Unit	6	380	25	7	Positive
SM	SM 42:2	FALSE	813.6	Unit	184.1	Unit	6	380	25	7	Positive
SM	SM 42:1	FALSE	815.7	Unit	184.1	Unit	6	380	25	7	Positive
SM	SM 42:0	FALSE	817.9	Unit	184.1	Unit	6	380	25	7	Positive
SM	SM 43:0	FALSE	831.9	Unit	184.1	Unit	6	380	25	7	Positive
SM	SM 43:1	FALSE	829.9	Unit	184.1	Unit	6	380	25	7	Positive
SM	SM 43:2	FALSE	827.9	Unit	184.1	Unit	6	380	25	7	Positive
SM	SM 44:2	FALSE	841.9	Unit	184.1	Unit	6	380	25	7	Positive
SM	SM 44:1	FALSE	843.9	Unit	184.1	Unit	6	380	25	7	Positive
SM	SM 44:0	FALSE	845.9	Unit	184.1	Unit	6	380	25	7	Positive
PS	PS 28:0 (IS)	TRUE	678.6	Unit	591.5	Unit	6	380	25	7	Negative
PS	PS 36:5	FALSE	780.6	Unit	693.6	Unit	6	380	25	7	Negative
PS	PS 36:4	FALSE	782.6	Unit	695.6	Unit	6	380	25	7	Negative
PS	PS 36:3	FALSE	784.6	Unit	697.6	Unit	6	380	25	7	Negative
PS	PS 36:2	FALSE	786.6	Unit	699.6	Unit	6	380	25	7	Negative
PS	PS 36:1	FALSE	788.6	Unit	701.6	Unit	6	380	25	7	Negative
PS	PS 36:0	FALSE	790.6	Unit	703.6	Unit	6	380	25	7	Negative
PS	PS 38:6	FALSE	806.6	Unit	719.6	Unit	6	380	25	7	Negative
PS	PS 38:5	FALSE	808.6	Unit	721.6	Unit	6	380	25	7	Negative
PS	PS 38:4	FALSE	810.6	Unit	723.6	Unit	6	380	25	7	Negative
PS	PS 38:3	FALSE	812.6	Unit	725.6	Unit	6	380	25	7	Negative
PS	PS 38:2	FALSE	814.6	Unit	727.6	Unit	6	380	25	7	Negative
PS	PS 38:1	FALSE	816.6	Unit	729.6	Unit	6	380	25	7	Negative
PS	PS 38:0	FALSE	818.6	Unit	731.6	Unit	6	380	25	7	Negative
PS	PS 40:9	FALSE	828.5	Unit	741.5	Unit	6	380	25	7	Negative
PS	PS 40:8	FALSE	830.5	Unit	743.5	Unit	6	380	25	7	Negative
PS	PS 40:7	FALSE	832.5	Unit	745.5	Unit	6	380	25	7	Negative
PS	PS 40:6	FALSE	834.5	Unit	747.5	Unit	6	380	25	7	Negative
PS	PS 40:5	FALSE	836.5	Unit	749.5	Unit	6	380	25	7	Negative
PS	PS 40:4	FALSE	838.6	Unit	751.6	Unit	6	380	25	7	Negative
PS	PS 40:3	FALSE	840.6	Unit	753.6	Unit	6	380	25	7	Negative
PS	PS 40:2	FALSE	842.6	Unit	755.6	Unit	6	380	25	7	Negative
PS	PS 40:1	FALSE	844.6	Unit	757.6	Unit	6	380	25	7	Negative
PS	PS 40:0	FALSE	846.6	Unit	759.6	Unit	6	380	25	7	Negative
PS	PS 44:12	FALSE	878.5	Unit	791.5	Unit	6	380	25	7	Negative
PS	PS 42:8	FALSE	958.5	Unit	771.5	Unit	6	380	25	7	Negative
PS	PS 42:7	FALSE	960.5	Unit	773.5	Unit	6	380	25	7	Negative
PS	PS 42:6	FALSE	962.6	Unit	775.6	Unit	6	380	25	7	Negative
PS	PS 42:5	FALSE	964.6	Unit	777.6	Unit	6	380	25	7	Negative
PS	PS 42:4	FALSE	966.6	Unit	779.6	Unit	6	380	25	7	Negative
PS	PS 28:0 (IS)_Pos	TURE	680.5	Unit	495.5	Unit	6	380	20	7	Positive
PS	PS 36:5_Pos	FALSE	782.5	Unit	597.5	Unit	6	380	20	7	Positive
PS	PS 36:4_Pos	FALSE	784.5	Unit	599.5	Unit	6	380	20	7	Positive
PS	PS 36:3_Pos	FALSE	786.5	Unit	601.5	Unit	6	380	20	7	Positive
PS	PS 36:2_Pos	FALSE	788.5	Unit	603.5	Unit	6	380	20	7	Positive
PS	PS 36:1_Pos	FALSE	790.5	Unit	605.5	Unit	6	380	20	7	Positive
PS	PS 36:0_Pos	FALSE	792.5	Unit	607.5	Unit	6	380	20	7	Positive
PS	PS 38:6_Pos	FALSE	808.5	Unit	623.5	Unit	6	380	20	7	Positive
PS	PS 38:5_Pos	FALSE	810.5	Unit	625.5	Unit	6	380	20	7	Positive
PS	PS 38:4_Pos	FALSE	812.5	Unit	627.5	Unit	6	380	20	7	Positive
PS	PS 38:3_Pos	FALSE	814.5	Unit	629.5	Unit	6	380	20	7	Positive
PS	PS 38:2_Pos	FALSE	816.5	Unit	631.5	Unit	6	380	20	7	Positive
PS	PS 38:1_Pos	FALSE	818.5	Unit	633.5	Unit	6	380	20	7	Positive
PS	PS 38:0_Pos	FALSE	820.5	Unit	635.5	Unit	6	380	20	7	Positive
PS	PS 40:9_Pos	FALSE	830.4	Unit	645.4	Unit	6	380	20	7	Positive
PS	PS 40:8_Pos	FALSE	832.4	Unit	647.4	Unit	6	380	20	7	Positive
PS	PS 40:7_Pos	FALSE	834.4	Unit	649.4	Unit	6	380	20	7	Positive
PS	PS 40:6_Pos	FALSE	836.4	Unit	651.4	Unit	6	380	20	7	Positive
PS	PS 40:5_Pos	FALSE	838.4	Unit	653.4	Unit	6	380	20	7	Positive
PS	PS 40:4_Pos	FALSE	840.5	Unit	655.5	Unit	6	380	20	7	Positive
PS	PS 40:3_Pos	FALSE	842.5	Unit	657.5	Unit	6	380	20	7	Positive
PS	PS 40:2_Pos	FALSE	844.5	Unit	659.5	Unit	6	380	20	7	Positive
PS	PS 40:1_Pos	FALSE	846.5	Unit	661.5	Unit	6	380	20	7	Positive
PS	PS 40:0_Pos	FALSE	848.5	Unit	663.5	Unit	6	380	20	7	Positive
PS	PS 44:12_Pos	FALSE	880.4	Unit	695.4	Unit	6	380	20	7	Positive
PS	PS 42:8_Pos	FALSE	960.4	Unit	775.4	Unit	6	380	20	7	Positive
PS	PS 42:7_Pos	FALSE	962.4	Unit	777.4	Unit	6	380	20	7	Positive
PS	PS 42:6_Pos	FALSE	964.5	Unit	779.5	Unit	6	380	20	7	Positive
PS	PS 42:5_Pos	FALSE	966.5	Unit	781.5	Unit	6	380	20	7	Positive
PS	PS 42:4_Pos	FALSE	968.5	Unit	783.5	Unit	6	380	20	7	Positive

## Sheet: Acylcarnitine MRM
Compound Group	Compound Name	ISTD?	Precursor Ion	MS1 Res	Product Ion	MS2 Res	Dwell	Fragmentor	Collision Energy	Cell Accelerator Voltage	Polarity
AcylCarnitine	AcylCarnitine 16:0-d3 (IS)	TRUE	403.4	Unit	85	Unit	6	380	30	5	Positive
AcylCarnitine	AcylCarnitine 16:1	FALSE	398.3	Unit	85	Unit	6	380	30	5	Positive
AcylCarnitine	AcylCarnitine 16:0	FALSE	400.4	Unit	85	Unit	6	380	30	5	Positive
AcylCarnitine	AcylCarnitine 18:2	FALSE	424.3	Unit	85	Unit	6	380	30	5	Positive
AcylCarnitine	AcylCarnitine 18:1	FALSE	426.4	Unit	85	Unit	6	380	30	5	Positive
AcylCarnitine	AcylCarnitine 18:0	FALSE	428.4	Unit	85	Unit	6	380	30	5	Positive
AcylCarnitine	AcylCarnitine 20:4	FALSE	448.3	Unit	85	Unit	6	380	30	5	Positive
AcylCarnitine	AcylCarnitine 22:6	FALSE	472.3	Unit	85	Unit	6	380	30	5	Positive
