# Supplementary material for: Remodeling of whole-body lipid metabolism and a diabetic-like phenotype caused by loss of CDK1 and hepatocyte division
Source: eLife. 2020 Dec 21;9:e63835. doi: 10.7554/eLife.63835 (PMC7771968; doi:10.7554/eLife.63835)
Supplement: Supplementary file 9. [file elife-63835-supp9.xlsx]

## Sheet: Sheet1
	Gene	Forward	Reverse
	Acaca	CGATTCATAATTGGGTCTGT	TTTCTGTCTCGACCTTGTTT
	Acadm	AGGGTTTAGTTTTGAGTTGACGG	CCCCGCTTTTGTCATATTCCG
	Acadsb	GATGAAGCAGACAGTCAAAA	TTCAACTTCAATGCCCATCA
	Acadvl	CAGGGCAGAATCGAAGTC	TTCCTCAAAGAACCGGGC
	Acot1	GACAAGAAGAGCTTCATTCCCGTG	CATCAGCATAGAACTCGCTCTTCC
	Acot2	GTTGTGCCAACAGGATTGGAA	GCTCAGCGTCGCATTTGTC
	Cdkn1a	CCTTGTCGCTGTCTTGCACT	AATCTGTCAGGCTGGTCTGC
	Cdkn1b	GAAATCTCTTCGGCCCGGTC	CACTTGCGCTGACTCGCTTC
	Cdkn2a	TGGTGAAGTTCGTGCGATCC	GCCCATCATCATCACCTGGT
	Cidec	ATGGACTACGCCATGAAGTCT	CGGTGCTAACACGACAGGG
	Cpt1a	ATCTGGATGGCTATGGTC	CCTGCTCACGGTATCTTT
	Cpt2	CAGCACAGCATCGTACCCA	TCCCAATGCCGTTCTCAAAAT
	Dgat1	GCTTCAAGTGGGGCTGATCC	GGGGACCGCCAGCTTTAAGA
	Dgat2	GCGCTACTTCCGAGACTACTT	GGGCCTTATGCCAGGAAACT
	Eef2	CACTTACCATCCCCCGTCAC	CTTTGGGGTCGCAGCTCTTA
	Fasn	TGGAAAGATAACTGGGTGAC	TGCTGTCGTCTGTAGTCTTG
	Foxo1	CCCAGGCCGGAGTTTAACC	GTTGCTCATAAAGTCGGTGCT
	Foxq1	AAATTGGAGGTGTTCGTCCCA	TCCCCGTCTGAGCCTAAGG
	Fstl1	CACGGCGAGGAGGAACCTA	TCTTGCCATTACTGCCACACA
	Gem	CCCCTGCAACCTCCGAAAC	AGACTCAGAAGAGATGACCGAG
	Gpdx	CCTTCTTTAAAGCCACTCCA	TGAATGTTCTTGGTGACTGC
	Gpx1	GTCCACCGTGTATGCCTTCT	TCTGCAGATCGTTCATCTCG
	Gpx2	GCCTCAAGTATGTCCGACCTG	GGAGAACGGGTCATCATAAGGG
	Gpx3	ACCAATTTGGCAAACAGGAG	AGCGGATGTCATGGATCTTC
	Hadha	TGCATTTGCCGCAGCTTTAC	GTTGGCCCAGATTTCGTTCA
	Hadhb	ACTACATCAAAATGGGCTCTCAG	AGCAGAAATGGAATGCGGACC
	Igfbp7	AAGAGGCGGAAGGGTAAAGC	TGGGGTAGGTGATGCCGTT
	Ins2	GCTTCTTCTACACACCCATGTC	AGCACTGATCTACAATGCCAC
	Lipe	AAGGACTTGAGCAACTCAGA	CATGGGTCTCACTTCATCTT
	Lpin1	CATGCTTCGGAAAGTCCTTCA	GGTTATTCTTTGGCGTCAACCT
	Mgll	GCTACTGGCCACTGATCTAC	GTTCAGGAGGAAAGAGACCT
	Mogat1	TGGTGCCAGTTTGGTTCCAG	TGCTCTGAGGTCGGGTTCA
	Pnpla2	ATCCGTGGCTGTCTACTAAA	AGTACACCGGGATAAATGTG
	Ppara	AGAGCCCCATCTGTCCTCTC	ACTGGTAGTCTGCAAAACCAAA
	Scd1	AGATCTCCAGTTCTTACACGACCAC	CTTTCATTTCAGGACGGATGTCT
	ChIP	Forward	Reverse
	Pdk4 promoter	TAAGGCTATTTAGGCAGTTT	CCAGACTTGTCCTTGTTTAC
	Pnpla2 promoter	AGGTTTCTAGTTTAGGATTGAAG	ACCTGAGCAGTAGTTATATACAT
	Scd1 promoter	CAGGCCTGCCTTTACCTTTG	AGACCAAACTGGCCTCAAGC
	Srebf1 promoter	TTTCTCCCGGTGCTCTGAAT	ATGGTCCAGGCAAGTTCTGG
