# Supplementary material for: Remodeling of whole-body lipid metabolism and a diabetic-like phenotype caused by loss of CDK1 and hepatocyte division
Source: eLife. 2020 Dec 21;9:e63835. doi: 10.7554/eLife.63835 (PMC7771968; doi:10.7554/eLife.63835)
Supplement: Supplementary file 10. [file elife-63835-supp10.xlsx]

## Sheet: Figure 1B
		Control	Cdk1 cKO
	Hepatic triacylglycerides (μg/mg protein)	55.147	35.0335
		77.7326	21.4089
		79.1999	47.2301
		73.1177	36.3322
		80.6142	22.2026
		82.136	36.4007

## Sheet: Figure 1C
		Control	Cdk1 cKO
	Average daily food intake (g)	3.5625	3.325
		3.7125	3.7875
		3.5625	3.6375
		3.75	3.825
			3.6875

## Sheet: Figure 1D
		Control	Cdk1 cKO
	Hepatocyte triacylglyceride (μg/mg protein)	115.602	84.3824
		126.263	80.9155
		120.412	71.7483

## Sheet: Figure 1E
		Control	Cdk1 cKO
	Plasma triacylglyceride (mM)	0.618178	0.40977
		0.636561	0.274103
		0.859833	0.601658
		0.60055	0.414004
		0.67477	0.486072
		0.81327	0.578166

## Sheet: Figure 1F
		Control	Cdk1 cKO
	Plasma LDL/VLDL-C (mg/dL)	9.96085	5.01007
		18.6997	5.05298
		18.8042	6.93195
		15.7897	11.3085
		15.4963	7.32042
		14.7665	6.19069

## Sheet: Figure 1G
		Control	Cdk1 cKO
	Plasma HDL-C (mg/dL)	61.4702	180.961
		73.528	152.575
		67.5259	158.252
		31.4998	105.424
		31.2138	155.261
		30.2845	174.479

## Sheet: Figure 1H
		Genes	Control						Cdk1 cKO
	Relative gene expression	Acaca	0.786631	0.884483	0.98984	1.2397	1.44226	0.657085	1.1892	0.457105	1.6083	1.4702	1.58077	1.10952
		Fasn	0.852373	1.00987	0.622264	1.14728	1.72784	0.640375	0.819186	1.25359	1.77931	1.18472	1.34228	0.821893
		Scd1	0.499726	1.56078	1.35386	1.1122	0.773968	0.699463	1.27284	0.782935	1.0235	1.13673	1.25241	0.849396
		Mogat1	1.00085	1.20288	0.989862	1.03023	0.871794	0.904451	0.985979	0.759454	1.30572	1.03389	1.07918	1.08233
		Lpin1	1.05392	1.14015	0.903059	0.917259	0.975112	1.01052	0.919845	0.960169	1.12163	1.87582	1.01387	1.00905
		Dgat1	0.983963	1.2168	0.990428	1.1977	0.75829	0.852907	0.920153	0.81474	1.15252	1.02808	1.35481	1.49755
		Dgat2	1.11164	1.21672	0.696153	0.942938	1.04917	0.983351	1.39754	0.774202	1.44724	0.495174	0.683706	0.835851
		Pnpla2	1.06105	1.11987	1.15177	0.858863	0.913586	0.894865	1.92141	2.6101	1.81723	2.38986	2.08552	2.61735
		Lipe	1.09662	1.11166	1.01789	0.910914	1.16091	0.701993	0.674043	0.597145	0.756542	0.719682	0.98605	1.1161
		Mgll	0.997309	0.864069	1.1627	1.23103	0.989922	0.754968	1.28628	0.903301	0.585685	0.751464	0.95249	0.549022

## Sheet: Figure 1J
		Control	Cdk1 cKO
	Quantification of ATGL immunoblot	1.07887	1.90375
		1.01291	1.80433
		0.926172	1.86571
		0.982046	1.82296

## Sheet: Figure 1L
		Genes	Control					Cdk1 cKO
	Relative gene expression	Foxo1	0.856594	0.661026	0.716841	1.44406	1.32148	2.12076	1.53403	3.22171	1.63749	1.93027
		Foxq1	0.590033	1.02343	0.44029	1.62283	1.32342	0.742538	0.649603	1.53184	1.27233	2.14694

## Sheet: Figure 1N
		Control	Cdk1 cKO
	Quantification of FOXO1 immunoblot	1.04244	1.95295
		1.04993	2.63558
		0.850058	2.77054
		1.05757	1.98933

[truncated: 52 more sheets: Figure 1O, Figure 1 S1A, Figure 1 S1C, Figure 1 S1D, Figure 1 S1E, Figure 1 S1F, Figure 1 S1G, Figure 1 S1H, Figure 2C, Figure 2D, Figure 2E, Figure 2F, Figure 2H, Figure 3B, Figure 3C, Figure 3D, Figure 3E, Figure 3G, Figure 3H, Figure 3I …]
